# Supplementary material for: Metatranscriptome of human lung microbial communities in a cohort of mechanically ventilated COVID-19 Omicron patients
Source: PubMed Central journal article supplement (PMC10638395; doi:10.1038/s41392-023-01684-1), 2023-11-10
Supplement: 41392_2023_1684_MOESM1_ESM.pdf [file 41392_2023_1684_MOESM1_ESM.pdf]

# Supplementary Materials for

## Metatranscriptome of human lung microbial communities in a cohort of mechanically ventilated COVID-19 Omicron patients

Lin Wang<sup>#1</sup>, Jia-Bao Cao<sup>#2</sup>, Bin-Bin Xia<sup>#2,3</sup>, Yue-Juan Li<sup>2,3#</sup>, Xuan Zhang<sup>2,15</sup>, Guo-Xin Mo<sup>1</sup>, Rui-Juan Wang<sup>4</sup>, Si-Qi Guo<sup>2</sup>, Yu-Qing Zhang<sup>2,3</sup>, Kun Xiao<sup>1</sup>, Guang-Fa Zhu<sup>5</sup>, Peng-Fei Liu<sup>1</sup>, Li-Cheng Song<sup>1</sup>, Xi-Hui Ma<sup>6</sup>, Ping-Chao Xiang<sup>7</sup>, Jiang Wang<sup>1</sup>, Yu-Hong Liu<sup>1</sup>, Fei Xie<sup>1</sup>, Xu-Dong Zhang<sup>2,3</sup>, Xiang-Xin Li<sup>8</sup>, Wan-Lu Sun<sup>9</sup>, Yan Cao<sup>10</sup>, Kai-Fei Wang<sup>11</sup>, Wen-Hui Zhang<sup>2,3</sup>, Wei-Chao Zhao<sup>4</sup>, Peng Yan<sup>12</sup>, Ji-Chao Chen<sup>13</sup>, Yu-Wei Yang<sup>6</sup>, Zhong-Kuo Yu<sup>1</sup>, Jing-Si Tang<sup>2</sup>, Li Xiao<sup>6</sup>, Jie-Min Zhou<sup>14</sup>, Li-Xin Xie<sup>\$1</sup>, Jun Wang<sup>\$2,3</sup>

Correspondence to: junwang@im.ac.cn or xielx301@126.com

### **This PDF file includes:**

Figures. S1 to S8  
Tables S1 to S7

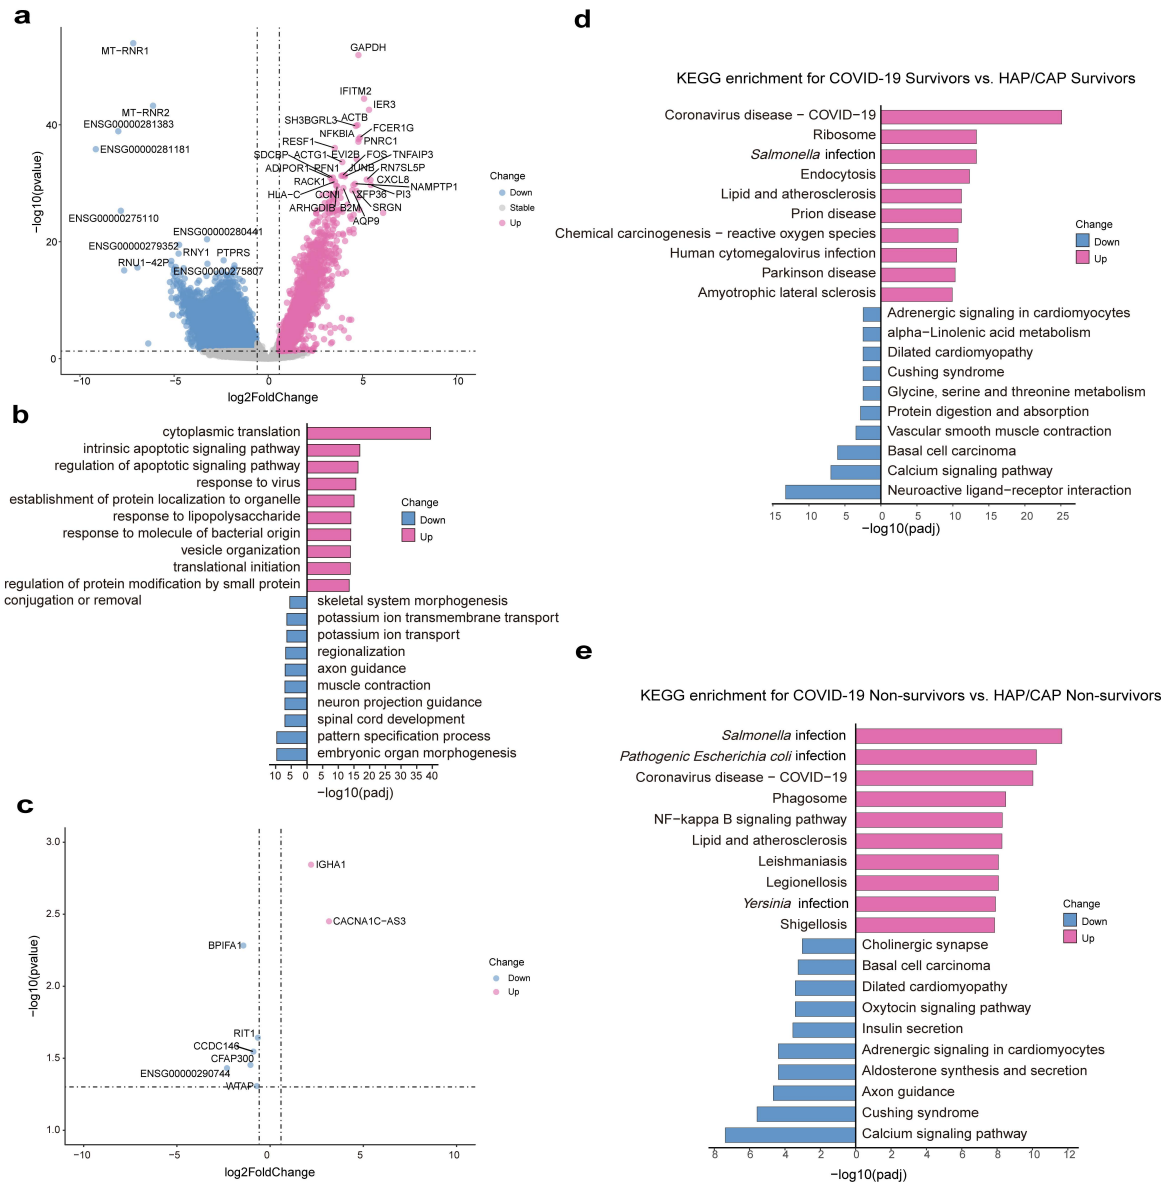

**Figure. S1. Gene Differential Expression Analysis in BALF of HAP/CAP Patients.**

(a) Volcano plot is presented to illustrate differential gene expression between invasive ventilated COVID-19 patients and HAP/CAP patients. The survival group exhibited up-regulation of 2324 genes and down-regulation of 33668 genes.

(b) Gene Ontology (Biological Process) enrichment analysis results for the differentially expressed genes identified in (a).

(c) The volcano plot shows the shared differentially expressed genes in HAP/CAP patients in both the survival and non-survival groups as well as the COVID-19 patient group, which survived, with matching directions of the differential expression. Down: down-regulated in survival group, Up: up-regulated in survival group.

(d) KEGG enrichment analysis for the differentially expressed genes identified in COVID-19 Survivors vs. HAP/CAP Survivors.

(e) KEGG enrichment analysis for the differentially expressed genes identified in COVID-19 Non-survivors vs. HAP/CAP Non-survivors. HAP/CAP patients (n=27), COVID-19 patients (n=63), non-survivors of the invasive ventilated COVID-19 patients (n=45), survivors of the invasive ventilated COVID-19 patients (n=18).

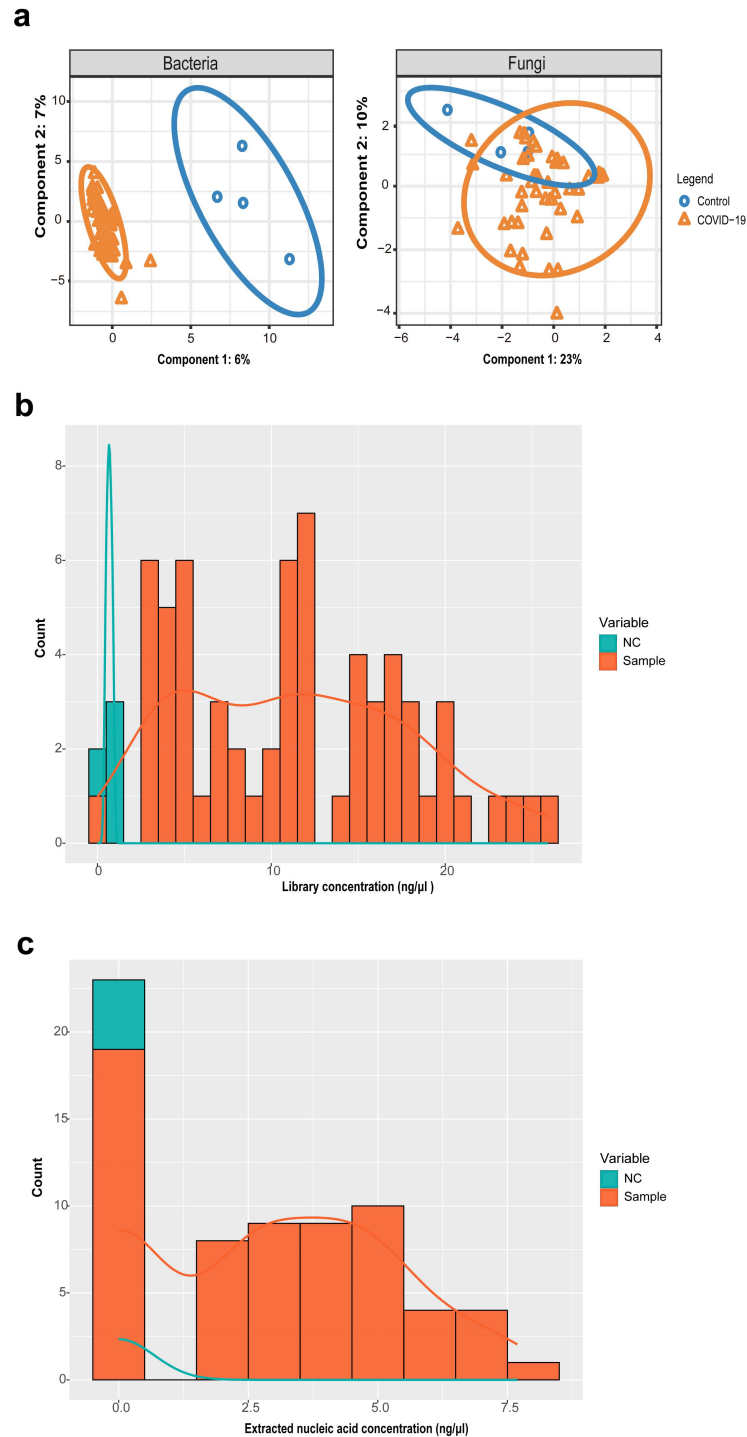

**Figure. S2. Comparison of BALF samples with Negative Controls.**

(a) Partial least squares discriminant analysis (PLS-DA) of COVID-19 and negative controls based on bacterial and fungal relative abundance. The left and right panels show significant differences in bacterial and fungal composition between COVID-19 and the negative reference, respectively. (b) The Library concentration of BALF samples with negative controls.

(c) The Extracted nucleic acid concentration of BALF samples and negative controls. COVID-19 patients (n=64), Negative Controls(n=4).

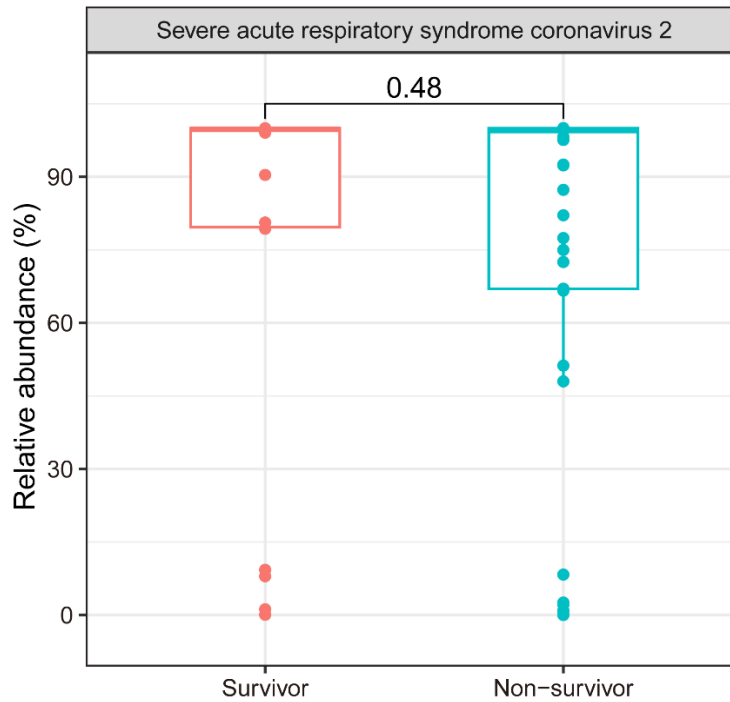

**Figure. S3. Comparison of SARS-CoV-2 abundance in survivors and non-survivors of invasive ventilated COVID-19.**

Box plot of SARS-CoV-2 relative abundance in survivors and non-survivors of invasive ventilated COVID-19. One-tailed wilcoxon rank-sum test was used for significance statistics. COVID-19 patients (n=63), non-survivors of the invasive ventilated COVID-19 patients (n=45), survivors of the invasive ventilated COVID-19 patients (n=18).

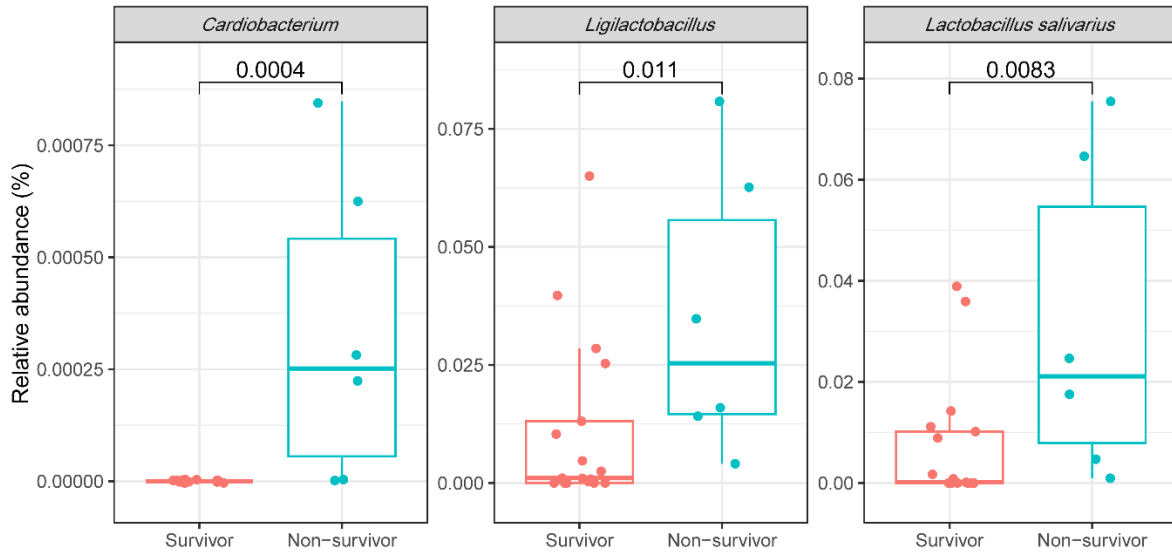

**Figure. S4. Significantly different bacteria between survivors and non-survivors of HAP/CAP patients.**

One-tailed Wilcoxon rank-sum test was used for significance statistics. HAP/CAP patients (n=27), non-survivors of the HAP/CAP patients (n=7), survivors of the HAP/CAP patients (n=20).

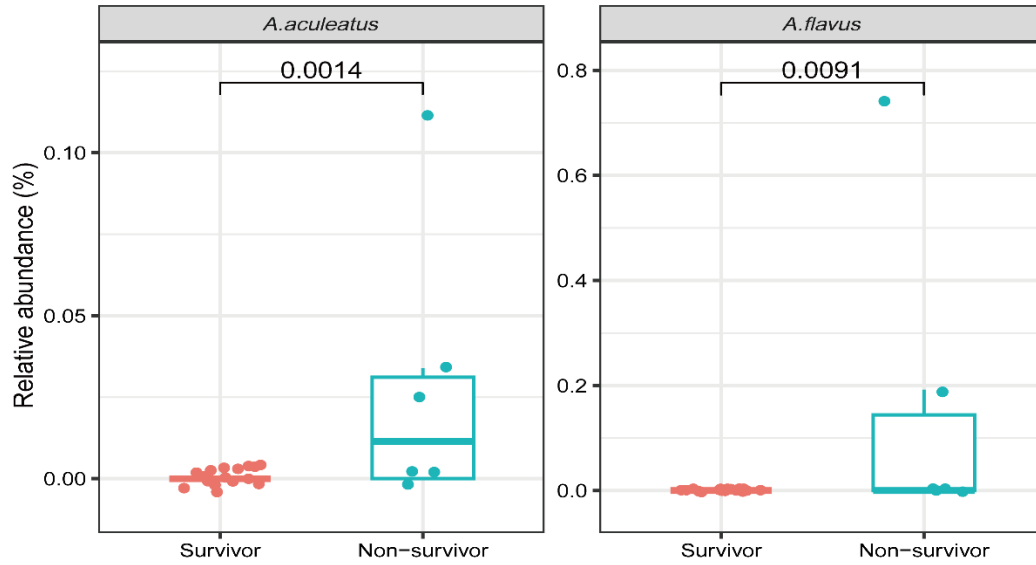

**Figure. S5. Significantly different fungi between survivors and non-survivors of HAP/CAP patients.**

One-tailed wilcoxon rank-sum test was used for significance statistics. HAP/CAP patients (n=27), non-survivors of the HAP/CAP patients (n=7), survivors of the HAP/CAP patients (n=20).



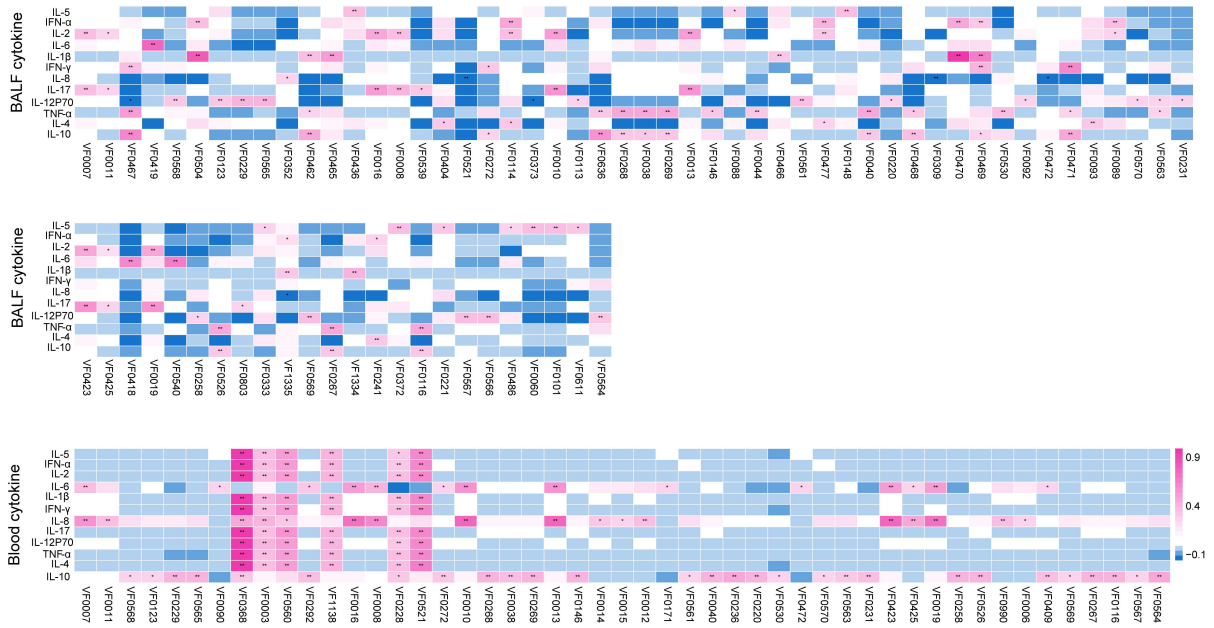

**Figure. S6. Heatmaps of cytokine levels with the common toxicity factors.**

Spearman correlation coefficients with adjusted p-values <0.05 are marked with an asterisk. COVID-19 patients (n=63).

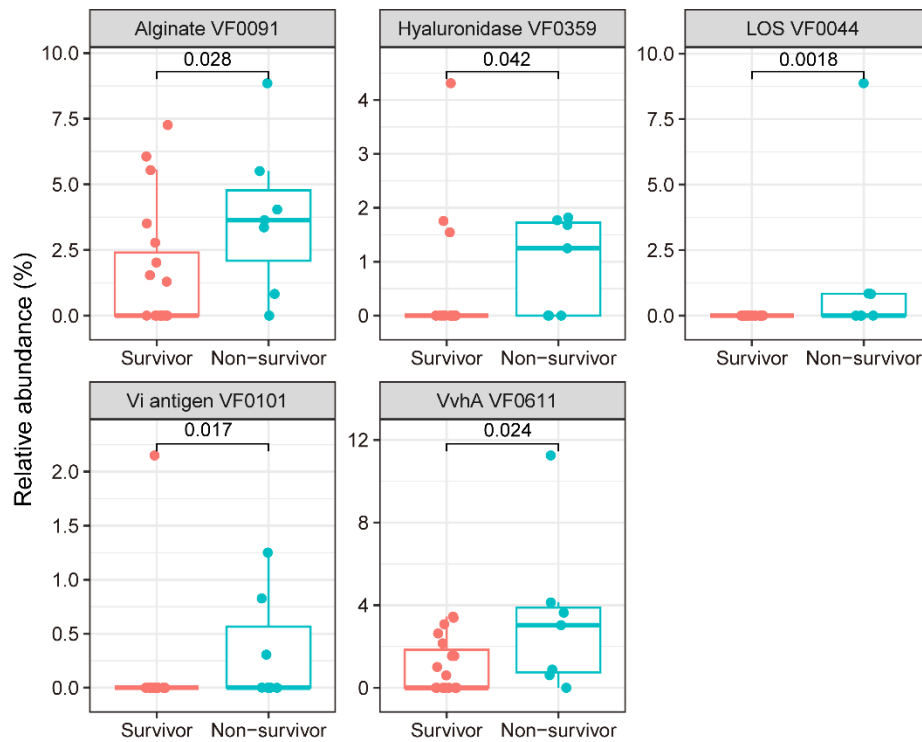

**Figure. S7. Significantly different virulence factors between survivors and non-survivors of HAP/CAP patients.**

One-tailed wilcoxon rank-sum test was used for significance statistics. HAP/CAP patients (n=27), non-survivors of the HAP/CAP patients (n=7), survivors of the HAP/CAP patients (n=20).

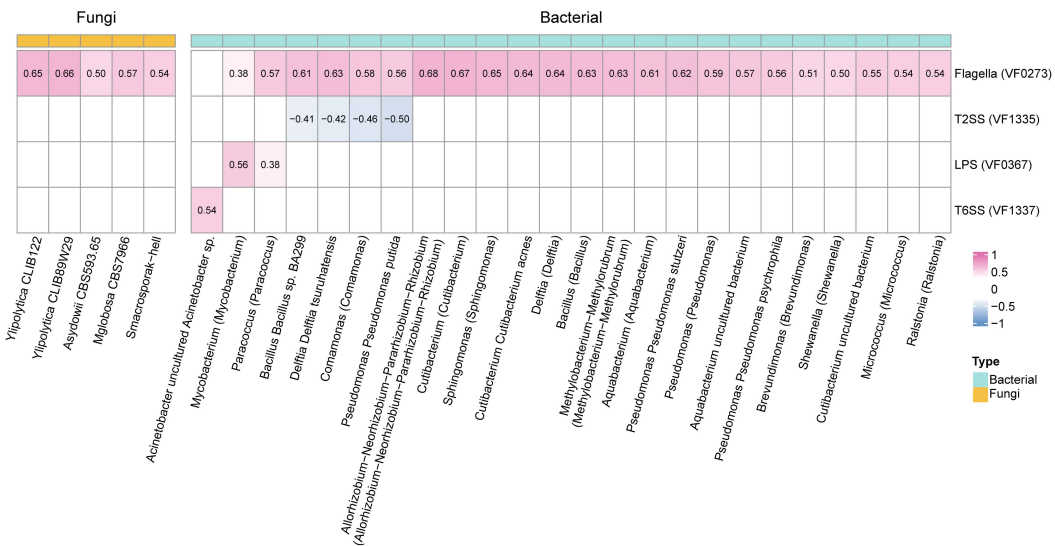

**Figure. S8. Correlation analysis between bacterial, fungi gene expression and virulence factors.**

Heatmap demonstrating correlation analysis between bacterial, fungi gene expression and virulence factors in invasive ventilated COVID-19 patients. The color-coded positions indicate adjusted  $p$ -values < 0.05 and the numbers within each grid represent Spearman correlation coefficients. Only absolute correlation coefficients greater than 0.5 are displayed. COVID-19 patients ( $n=63$ ).

**Table S1. Comparison of two cohorts**

|               | HAP/CAP(n=27)<br>Median (IQR) | COVID-19(n=64)<br>Median (IQR) | <i>P</i> value |
|---------------|-------------------------------|--------------------------------|----------------|
| Age, yr       | 71.00 (24.00)                 | 80.00 (15.00)                  | 0.08           |
| Sex           |                               |                                | 0.28           |
| Male, n (%)   | 23.00(85.19)                  | 48.00(75.00)                   |                |
| Female, n (%) | 4.00(14.81)                   | 16.00(25.00)                   |                |

HAP/CAP:Hospital/Community Acquired Pneumonia,IQR=interquartile range, *P* values were evaluated by Mann-Whitney test or Chi-square test ,Two-tailed degree of significance between groups was set at  $P < 0.05$ .

**Table S2. The statistics results of genome assembly of the SARS-CoV-2 strains**

| Samples | Contigs | Largest contig (bp) | Total length (bp) | GC (%) |
|---------|---------|---------------------|-------------------|--------|
| s10.fa  | 1       | 29984               | 29984             | 37.88  |
| s11.fa  | 1       | 29747               | 29747             | 37.85  |
| s12.fa  | 1       | 29871               | 29871             | 37.93  |
| s14.fa  | 1       | 29870               | 29870             | 37.86  |
| s16.fa  | 1       | 33717               | 33717             | 36.71  |
| s18.fa  | 1       | 24628               | 24628             | 37.37  |
| s1.fa   | 1       | 29943               | 29943             | 37.89  |
| s20.fa  | 1       | 29870               | 29870             | 37.82  |
| s22.fa  | 1       | 29869               | 29869             | 37.81  |
| s23.fa  | 1       | 29897               | 29897             | 37.92  |
| s24.fa  | 1       | 29870               | 29870             | 37.86  |
| s25.fa  | 1       | 29982               | 29982             | 37.83  |
| s28.fa  | 1       | 29870               | 29870             | 37.82  |
| s29.fa  | 1       | 29897               | 29897             | 38.03  |
| s2.fa   | 1       | 30006               | 30006             | 37.84  |
| s31.fa  | 1       | 23233               | 23233             | 37.58  |
| s34.fa  | 1       | 29870               | 29870             | 37.88  |
| s35.fa  | 1       | 28255               | 28255             | 37.49  |
| s3.fa   | 1       | 29795               | 29795             | 37.86  |
| s4.fa   | 1       | 29930               | 29930             | 37.89  |
| s5.fa   | 1       | 29870               | 29870             | 37.82  |
| s6.fa   | 1       | 29882               | 29882             | 37.82  |
| s7.fa   | 2       | 23279               | 41441             | 37.93  |
| s8.fa   | 1       | 29795               | 29795             | 37.87  |
| s9.fa   | 1       | 29935               | 29935             | 37.87  |
| ss11.fa | 1       | 23403               | 23403             | 37.57  |
| ss16.fa | 1       | 29839               | 29839             | 37.85  |
| ss18.fa | 1       | 23425               | 23425             | 37.55  |
| ss27.fa | 1       | 29861               | 29861             | 37.86  |
| ss28.fa | 1       | 29896               | 29896             | 37.88  |
| ss4.fa  | 1       | 29876               | 29876             | 38.16  |
| ss9.fa  | 1       | 29862               | 29862             | 37.83  |

**Table S3. The statistics results of single nucleotide polymorphism (SNPs) identified in our study**

| P<br>O<br>S | R<br>E<br>F | A<br>L<br>E<br>L | Q<br>U<br>A<br>L     | FI<br>L<br>T<br>E<br>R | INFO                                                                                                                                                          | FO<br>RM<br>AT                     | FOR<br>MAT_<br>value                                  | TY<br>PE | Reported<br>in 682<br>genomes |
|-------------|-------------|------------------|----------------------|------------------------|---------------------------------------------------------------------------------------------------------------------------------------------------------------|------------------------------------|-------------------------------------------------------|----------|-------------------------------|
| 44          | C           | T                | 10<br>11<br>2.0<br>6 | P<br>A<br>S<br>S       | AC=2;AF=1.00;AN=2;DP=371;ExcessHet=0.0000;FS=0.000;MLEAC=2;MLEAF=1.00;MQ=60.00;QD=28.33;SOR=0.855                                                             | GT<br>:A<br>D:<br>DP:<br>GQ<br>:PL | 1/1:0,<br>357:35<br>7:99:1<br>0126,1<br>071,0         | BA<br>.5 | yes                           |
| 21<br>0     | G           | T                | 42<br>37.<br>64      | P<br>A<br>S<br>S       | AC=1;AF=0.500;AN=2;BaseQRankSum=-2.200e+00;DP=888;ExcessHet=0.0000;FS=0.588;MLEAC=1;MLEAF=0.500;MQ=60.00;MQRankSum=0.00;QD=4.83;ReadPosRankSum=2.67;SOR=0.614 | GT<br>:A<br>D:<br>DP:<br>GQ<br>:PL | 0/1:63<br>0,247:<br>877:99<br>:4245,<br>0,2546<br>0   | BA<br>.5 | yes                           |
| 21<br>3     | G           | T                | 65<br>30<br>2.0<br>6 | P<br>A<br>S<br>S       | AC=2;AF=1.00;AN=2;DP=1609;ExcessHet=0.0000;FS=0.000;MLEAC=2;MLEAF=1.00;MQ=60.00;QD=25.36;SOR=0.928                                                            | GT<br>:A<br>D:<br>DP:<br>GQ<br>:PL | 1/1:0,<br>1586:1<br>586:99<br>:65316<br>,4770,<br>0   | BA<br>.5 | yes                           |
| 24<br>1     | C           | T                | 20<br>55<br>05.<br>1 | P<br>A<br>S<br>S       | AC=2;AF=1.00;AN=2;DP=5558;ExcessHet=0.0000;FS=0.000;MLEAC=2;MLEAF=1.00;MQ=60.00;QD=25.36;SOR=0.818                                                            | GT<br>:A<br>D:<br>DP:<br>GQ<br>:PL | 1/1:0,<br>5405:5<br>407:99<br>:20551<br>9,1624<br>6,0 | BA<br>.5 | yes                           |
| 40<br>7     | G           | T                | 37.<br>32            | P<br>A<br>S<br>S       | AC=2;AF=1.00;AN=2;DP=2;ExcessHet=0.0000;FS=0.000;MLEAC=1;MLEAF=0.500;MQ=60.00;QD=18.66;SOR=0.693                                                              | GT<br>:A<br>D:<br>DP:<br>GQ<br>:PL | 1/1:0,<br>2:2:6:<br>49,6,0                            | BA<br>.5 | no                            |
| 41<br>0     | G           | A                | 37.<br>32            | P<br>A<br>S<br>S       | AC=2;AF=1.00;AN=2;DP=2;ExcessHet=0.0000;FS=0.000;MLEAC=1;MLEAF=0.500;MQ=60.00;QD=18.66;SOR=0.693                                                              | GT<br>:A<br>D:<br>DP:<br>GQ<br>:PL | 1/1:0,<br>2:2:6:<br>49,6,0                            | BA<br>.5 | no                            |

|     |   |   |       |   |                                                                                                                                                                    |                                                                                                                      |          |    |
|-----|---|---|-------|---|--------------------------------------------------------------------------------------------------------------------------------------------------------------------|----------------------------------------------------------------------------------------------------------------------|----------|----|
| 628 | T | G | 43.64 | P | AC=1;AF=0.500;AN=2;BaseQRankSum=-4.970e-01;DP=15;ExcessHet=0.0000;FS=0.000;MLEAC=1;MLEAF=0.500;MQ=60.00;MQRankSum=0.00;QD=3.36;ReadPosRankSum=-2.093e+00;SOR=0.551 | GT<br>:A<br>D: 0 1:11,<br>2:13:5<br>DP: 1:0 1:6<br>GQ 28_T_<br>:PG G:51,0<br>T:P ,456:6<br>ID: 28<br>PL:<br>PS<br>GT | BA<br>.5 | no |
| 631 | T | A | 43.64 | P | AC=1;AF=0.500;AN=2;BaseQRankSum=-6.740e-01;DP=13;ExcessHet=0.0000;FS=0.000;MLEAC=1;MLEAF=0.500;MQ=60.00;MQRankSum=0.00;QD=3.36;ReadPosRankSum=-2.093e+00;SOR=0.551 | GT<br>:A<br>D: 0 1:11,<br>2:13:5<br>DP: 1:0 1:6<br>GQ 28_T_<br>:PG G:51,0<br>T:P ,456:6<br>ID: 28<br>PL:<br>PS<br>GT | BA<br>.5 | no |
| 633 | T | G | 43.64 | P | AC=1;AF=0.500;AN=2;BaseQRankSum=-6.740e-01;DP=13;ExcessHet=0.0000;FS=0.000;MLEAC=1;MLEAF=0.500;MQ=60.00;MQRankSum=0.00;QD=3.36;ReadPosRankSum=-2.102e+00;SOR=0.551 | GT<br>:A<br>D: 0 1:11,<br>2:13:5<br>DP: 1:0 1:6<br>GQ 28_T_<br>:PG G:51,0<br>T:P ,456:6<br>ID: 28<br>PL:<br>PS<br>GT | BA<br>.5 | no |
| 638 | A | T | 35.48 | P | AC=2;AF=1.00;AN=2;DP=1;ExcessHet=0.0000;FS=0.000;MLEAC=1;MLEAF=0.500;MQ=60.00;QD=25.36;SOR=1.609                                                                   | GT<br>:A<br>D: 1 1:0,1<br>:1:3:1 <br>DP: 1:630_<br>GQ T_TG<br>:PG CC:45<br>T:P ,3,0:63<br>ID: 0<br>PL:<br>PS<br>GT   | BA<br>.5 | no |
| 640 | G | A | 35.48 | P | AC=2;AF=1.00;AN=2;DP=1;ExcessHet=0.0000;FS=0.000;MLEAC=1;MLEAF=0.500;MQ=60.00;QD=28.73;SOR=1.609                                                                   | GT<br>:A<br>D: 1 1:0,1<br>:1:3:1 <br>DP: 1:630_<br>GQ T_TG<br>:PG CC:45                                              | BA<br>.5 | no |

|    |   |   |     |   |                           |     |         |    |     |
|----|---|---|-----|---|---------------------------|-----|---------|----|-----|
| 64 | C | G | 35. | P | AC=2;AF=1.00;AN=2;DP=     | T:P | ,3,0:63 |    |     |
| 3  |   |   | 48  | A | 1;ExcessHet=0.0000;FS=0.0 | ID: | 0       |    |     |
|    |   |   |     | S | 00;MLEAC=1;MLEAF=0.5      | PL: |         |    |     |
|    |   |   |     | S | 00;MQ=60.00;QD=30.97;S    | PS  |         |    |     |
|    |   |   |     |   | OR=1.609                  | GT  |         |    |     |
|    |   |   |     |   |                           | :A  |         |    |     |
|    |   |   |     |   |                           | D:  | 1 1:0,1 |    |     |
|    |   |   |     |   |                           | DP: | :1:3:1  |    |     |
|    |   |   |     |   |                           | GQ  | 1:630_  | BA |     |
|    |   |   |     |   |                           | :PG | T_TG    | .5 | no  |
|    |   |   |     |   |                           | T:P | CC:45   |    |     |
|    |   |   |     |   |                           | ID: | ,3,0:63 |    |     |
|    |   |   |     |   |                           | PL: | 0       |    |     |
|    |   |   |     |   |                           | PS  |         |    |     |
|    |   |   |     |   | AC=2;AF=1.00;AN=2;Base    |     |         |    |     |
|    |   |   |     |   | QRankSum=4.07;DP=5984;    | GT  | 1/1:1,  |    |     |
| 67 | T | G | 22  | P | ExcessHet=0.0000;FS=0.00  | :A  | 5811:5  |    |     |
| 0  |   |   | 86  | A | 0;MLEAC=2;MLEAF=1.00;     | D:  | 829:99  | BA |     |
|    |   |   | 12. | S | MQ=60.00;MQRankSum=-      | DP: | :22862  | .5 | yes |
|    |   |   | 1   | S | 4.400e-                   | GQ  | 6,1748  |    |     |
|    |   |   |     |   | 02;QD=28.73;ReadPosRank   | :PL | 4,0     |    |     |
|    |   |   |     |   | Sum=1.39;SOR=0.353        |     |         |    |     |
|    |   |   |     |   |                           | GT  | 1/1:0,  |    |     |
|    |   |   |     |   |                           | :A  | 1111:1  |    |     |
| 70 | C | T | 31  | P | AC=2;AF=1.00;AN=2;DP=     | D:  | 111:99  | BA |     |
| 6  |   |   | 26  | A | 1140;ExcessHet=0.0000;FS  | DP: | :31275  | .5 | no  |
|    |   |   | 1.0 | S | =0.000;MLEAC=2;MLEAF      | GQ  | ,3332,  |    |     |
|    |   |   | 6   | S | =1.00;MQ=60.00;QD=28.14   | :PL | 0       |    |     |
|    |   |   |     |   | ;SOR=0.739                | GT  |         |    |     |
|    |   |   |     |   |                           | :A  |         |    |     |
|    |   |   |     |   |                           | D:  | 1 1:0,1 |    |     |
|    |   |   |     |   |                           | DP: | :1:3:1  |    |     |
|    |   |   |     |   |                           | GQ  | 1:767_  | BA |     |
|    |   |   |     |   |                           | :PG | G_A:4   | .5 | no  |
|    |   |   |     |   |                           | T:P | 5,3,0:7 |    |     |
|    |   |   |     |   |                           | ID: | 67      |    |     |
|    |   |   |     |   |                           | PL: |         |    |     |
|    |   |   |     |   |                           | PS  |         |    |     |
|    |   |   |     |   |                           | GT  |         |    |     |
|    |   |   |     |   |                           | :A  | 1 1:0,1 |    |     |
|    |   |   |     |   |                           | D:  | :1:3:1  |    |     |
|    |   |   |     |   |                           | DP: | 1:767_  | BA |     |
| 77 | T | A | 35. | P | AC=2;AF=1.00;AN=2;DP=     | GQ  | G_A:4   | .5 | no  |
| 1  |   |   | 48  | A | 1;ExcessHet=0.0000;FS=0.0 | :PG | 5,3,0:7 |    |     |
|    |   |   |     | S | 00;MLEAC=1;MLEAF=0.5      | T:P | 67      |    |     |
|    |   |   |     | S | 00;MQ=60.00;QD=30.97;S    | ID: |         |    |     |
|    |   |   |     |   | OR=1.609                  |     |         |    |     |



|    |   |   |     |   |                                                     |                         |    |  |     |
|----|---|---|-----|---|-----------------------------------------------------|-------------------------|----|--|-----|
| 85 | T | C | 32. | P | AC=1;AF=0.500;AN=2;BaseQRankSum=-9.670e-            | PL:<br>PS               |    |  |     |
| 1  |   |   | 64  | A | 01;DP=3;ExcessHet=0.0000                            | GT                      |    |  |     |
|    |   |   |     | S | ;FS=0.000;MLEAC=1;MLEAF=0.500;MQ=60.00;MQR          | :A 0/1:1,<br>D: 2:3:33  | BA |  | no  |
|    |   |   |     | S | ankSum=0.00;QD=10.88;ReadPosRankSum=0.967;SOR=0.223 | DP: :40,0,3<br>GQ 3     | .5 |  |     |
|    |   |   |     |   |                                                     | :PL                     |    |  |     |
| 10 | T | A | 35. | P | AC=2;AF=1.00;AN=2;DP=                               | GT                      |    |  |     |
| 12 |   |   | 48  | A | 1;ExcessHet=0.0000;FS=0.0                           | :A 1 1:0,1<br>D: :1:3:1 |    |  |     |
|    |   |   |     | S | 00;MLEAC=1;MLEAF=0.5                                | DP: 1:1007              | BA |  | no  |
|    |   |   |     | S | 00;MQ=60.00;QD=30.62;SOR=1.609                      | GQ _AG_<br>:PG A:45,3   | .5 |  |     |
|    |   |   |     |   |                                                     | T:P ,0:100<br>ID: 7     |    |  |     |
|    |   |   |     |   |                                                     | PL:                     |    |  |     |
|    |   |   |     |   |                                                     | PS                      |    |  |     |
|    |   |   |     |   |                                                     | GT                      |    |  |     |
| 10 | G | C | 35. | P | AC=2;AF=1.00;AN=2;DP=                               | :A 1 1:0,1<br>D: :1:3:1 |    |  |     |
| 13 |   |   | 48  | A | 1;ExcessHet=0.0000;FS=0.0                           | DP: 1:1007              | BA |  | no  |
|    |   |   |     | S | 00;MLEAC=1;MLEAF=0.5                                | GQ _AG_<br>:PG A:45,3   | .5 |  |     |
|    |   |   |     | S | 00;MQ=60.00;QD=28.17;SOR=1.609                      | T:P ,0:100<br>ID: 7     |    |  |     |
|    |   |   |     |   |                                                     | PL:                     |    |  |     |
|    |   |   |     |   |                                                     | PS                      |    |  |     |
|    |   |   |     |   |                                                     | GT                      |    |  |     |
| 10 | A | T | 35. | P | AC=2;AF=1.00;AN=2;DP=                               | :A 1 1:0,1<br>D: :1:3:1 |    |  |     |
| 15 |   |   | 48  | A | 1;ExcessHet=0.0000;FS=0.0                           | DP: 1:1007              | BA |  | no  |
|    |   |   |     | S | 00;MLEAC=1;MLEAF=0.5                                | GQ _AG_<br>:PG A:45,3   | .5 |  |     |
|    |   |   |     | S | 00;MQ=60.00;QD=26.80;SOR=1.609                      | T:P ,0:100<br>ID: 7     |    |  |     |
|    |   |   |     |   |                                                     | PL:                     |    |  |     |
|    |   |   |     |   |                                                     | PS                      |    |  |     |
| 10 | G | T | 36  | P | AC=1;AF=0.500;AN=2;BaseQRankSum=-                   | GT 0/1:66               |    |  |     |
| 85 |   |   | 85. | A | 1.051e+00;DP=897;Excess                             | :A 5,224:               |    |  |     |
|    |   |   | 64  | S | Het=0.0000;FS=0.610;MLE                             | D: 889:99               | BA |  | yes |
|    |   |   |     | S | AC=1;MLEAF=0.500;MQ=                                | DP: :3693,              | .5 |  |     |
|    |   |   |     |   | 60.00;MQRankSum=0.00;Q                              | GQ 0,1658               |    |  |     |
|    |   |   |     |   |                                                     | :PL 0                   |    |  |     |

D=4.15;ReadPosRankSum=0.274;SOR=0.762

|          |        |           |                  |                                                                                                                                                              |                                                                                                                                                                                                                                                                                                                                                                                                                                                                                                                                                 |
|----------|--------|-----------|------------------|--------------------------------------------------------------------------------------------------------------------------------------------------------------|-------------------------------------------------------------------------------------------------------------------------------------------------------------------------------------------------------------------------------------------------------------------------------------------------------------------------------------------------------------------------------------------------------------------------------------------------------------------------------------------------------------------------------------------------|
| 12<br>07 | A<br>T | 35.<br>48 | P<br>A<br>S<br>S | AC=2;AF=1.00;AN=2;DP=1;ExcessHet=0.0000;FS=0.00;MLEAC=1;MLEAF=0.500;MQ=60.00;QD=26.00;SOR=1.609                                                              | GT<br>:A<br>D: 1 1:0,1<br>DP: :1:3:1 <br>GQ 1:1207 BA<br>:PG _A_T: .5 no<br>T:P 45,3,0<br>ID: 1207<br>PL:<br>PS<br>GT<br>:A<br>D: 1 1:0,1<br>DP: :1:3:1 <br>GQ 1:1207 BA<br>:PG _A_T: .5 no<br>T:P 45,3,0<br>ID: 1207<br>PL:<br>PS<br>GT<br>:A<br>D: 0 1:3,2<br>DP: :5:75:<br>GQ 0 1:14 BA<br>:PG 68_T_ .5 no<br>G:75,0<br>T:P ,100:1<br>ID: 468<br>PL:<br>PS<br>GT<br>:A<br>D: 1 1:0,1<br>DP: :1:3:1 <br>GQ 1:1495 BA<br>:PG _G_A: .5 no<br>T:P 45,3,0<br>ID: 1495<br>PL:<br>PS<br>GT 1 1:0,1<br>:A :1:3:1  BA<br>D: 1:1495 .5 no<br>DP: _G_A: |
| 12<br>10 | G<br>A | 35.<br>48 | P<br>A<br>S<br>S | AC=2;AF=1.00;AN=2;DP=1;ExcessHet=0.0000;FS=0.00;MLEAC=1;MLEAF=0.500;MQ=60.00;QD=30.02;SOR=1.609                                                              |                                                                                                                                                                                                                                                                                                                                                                                                                                                                                                                                                 |
| 14<br>68 | T<br>G | 67.<br>64 | P<br>A<br>S<br>S | AC=1;AF=0.500;AN=2;BaseQRankSum=0.00;DP=5;ExcessHet=0.0000;FS=0.000;MLEAC=1;MLEAF=0.500;MQ=60.00;MQRankSum=0.00;QD=13.53;ReadPosRankSum=-6.740e-01;SOR=0.368 |                                                                                                                                                                                                                                                                                                                                                                                                                                                                                                                                                 |
| 14<br>95 | G<br>A | 35.<br>48 | P<br>A<br>S<br>S | AC=2;AF=1.00;AN=2;DP=1;ExcessHet=0.0000;FS=0.00;MLEAC=1;MLEAF=0.500;MQ=60.00;QD=31.98;SOR=1.609                                                              |                                                                                                                                                                                                                                                                                                                                                                                                                                                                                                                                                 |
| 14<br>98 | C<br>T | 35.<br>48 | P<br>A<br>S<br>S | AC=2;AF=1.00;AN=2;DP=1;ExcessHet=0.0000;FS=0.00;MLEAC=1;MLEAF=0.500;MQ=60.00;QD=31.98;SOR=1.609                                                              |                                                                                                                                                                                                                                                                                                                                                                                                                                                                                                                                                 |

|          |     |           |                  |                                                                                                                                                                                          |                                                                                                                                                                                                                                                                                                                                                                                                                                                                                                                                                                                                                                                                               |
|----------|-----|-----------|------------------|------------------------------------------------------------------------------------------------------------------------------------------------------------------------------------------|-------------------------------------------------------------------------------------------------------------------------------------------------------------------------------------------------------------------------------------------------------------------------------------------------------------------------------------------------------------------------------------------------------------------------------------------------------------------------------------------------------------------------------------------------------------------------------------------------------------------------------------------------------------------------------|
|          |     |           |                  | 00;MQ=60.00;QD=27.51;S<br>OR=1.609                                                                                                                                                       | GQ 45,3,0:<br>:PG 1495<br>T:P<br>ID:<br>PL:<br>PS<br>GT<br>:A<br>D: 1 1:0,1<br>DP: :1:3:1 <br>GQ 1:1495 BA<br>:PG _G_A: .5 no<br>T:P 45,3,0:<br>ID: 1495<br>PL:<br>PS<br>GT<br>:A<br>D: 0 1:2,2<br>DP: :4:78:<br>GQ 0 1:15 BA<br>:PG 09_G_ .5 no<br>A:78,0<br>T:P ,78:15<br>ID: 09<br>PL:<br>PS<br>GT<br>:A<br>D: 0 1:2,2<br>DP: :4:78:<br>GQ 0 1:15 BA<br>:PG 09_G_ .5 no<br>A:78,0<br>T:P ,78:15<br>ID: 09<br>PL:<br>PS<br>GT<br>:A<br>D: 0 1:2,2<br>DP: :4:78:<br>GQ 0 1:15 BA<br>:PG 09_G_ .5 no<br>A:78,0<br>T:P ,78:15<br>ID: 09<br>PL:<br>PS<br>GT<br>:A<br>D: 0 1:2,2<br>DP: :4:78:<br>GQ 0 1:15 BA<br>:PG 09_G_ .5 no<br>A:78,0<br>T:P ,78:15<br>ID: 09<br>PL:<br>PS |
| 14<br>99 | T C | 35.<br>48 | P<br>A<br>S<br>S | AC=2;AF=1.00;AN=2;DP=<br>1;ExcessHet=0.0000;FS=0.0<br>00;MLEAC=1;MLEAF=0.5<br>00;MQ=60.00;QD=29.11;S<br>OR=1.609                                                                         |                                                                                                                                                                                                                                                                                                                                                                                                                                                                                                                                                                                                                                                                               |
| 15<br>09 | G A | 70.<br>64 | P<br>A<br>S<br>S | AC=1;AF=0.500;AN=2;Bas<br>eQRankSum=0.00;DP=4;Ex<br>cessHet=0.0000;FS=0.000;<br>MLEAC=1;MLEAF=0.500;<br>MQ=60.00;MQRankSum=0.<br>00;QD=17.66;ReadPosRank<br>Sum=1.38;SOR=0.693           |                                                                                                                                                                                                                                                                                                                                                                                                                                                                                                                                                                                                                                                                               |
| 15<br>12 | G C | 70.<br>64 | P<br>A<br>S<br>S | AC=1;AF=0.500;AN=2;Bas<br>eQRankSum=0.00;DP=4;Ex<br>cessHet=0.0000;FS=0.000;<br>MLEAC=1;MLEAF=0.500;<br>MQ=60.00;MQRankSum=0.<br>00;QD=17.66;ReadPosRank<br>Sum=-<br>1.383e+00;SOR=0.693 |                                                                                                                                                                                                                                                                                                                                                                                                                                                                                                                                                                                                                                                                               |
| 15<br>15 | A T | 70.<br>64 | P<br>A<br>S<br>S | AC=1;AF=0.500;AN=2;Bas<br>eQRankSum=0.00;DP=4;Ex<br>cessHet=0.0000;FS=0.000;<br>MLEAC=1;MLEAF=0.500;<br>MQ=60.00;MQRankSum=0.<br>00;QD=17.66;ReadPosRank<br>Sum=-<br>1.383e+00;SOR=0.693 |                                                                                                                                                                                                                                                                                                                                                                                                                                                                                                                                                                                                                                                                               |

|          |        |                      |                  |                                                                                                                                                                                 |                                                                           |                                                          |          |     |
|----------|--------|----------------------|------------------|---------------------------------------------------------------------------------------------------------------------------------------------------------------------------------|---------------------------------------------------------------------------|----------------------------------------------------------|----------|-----|
| 16<br>27 | C<br>T | 20<br>50<br>94.<br>1 | P<br>A<br>S<br>S | AC=2;AF=1.00;AN=2;Base<br>QRankSum=1.38;DP=5876;<br>ExcessHet=0.0000;FS=0.00<br>0;MLEAC=2;MLEAF=1.00;<br>MQ=60.00;MQRankSum=0.<br>00;QD=30.97;ReadPosRank<br>Sum=2.85;SOR=0.381 | GT<br>:A<br>D:<br>DP:<br>GQ<br>:PL                                        | 1/1:5,<br>3760:3<br>781:99<br>:20510<br>8,1590<br>0,0    | BA<br>.5 | yes |
| 17<br>99 | A<br>G | 35.<br>48            | P<br>A<br>S<br>S | AC=2;AF=1.00;AN=2;DP=<br>1;ExcessHet=0.0000;FS=0.0<br>00;MLEAC=1;MLEAF=0.5<br>00;MQ=60.00;QD=28.08;S<br>OR=1.609                                                                | GT<br>:A<br>D:<br>DP:<br>GQ<br>:PG<br>T:P<br>ID:<br>PL:<br>PS<br>GT<br>:A | 1 1:0,1<br>:1:3:1 <br>1:1799<br>_A_G:<br>45,3,0:<br>1799 | BA<br>.5 | no  |
| 18<br>01 | A<br>T | 35.<br>48            | P<br>A<br>S<br>S | AC=2;AF=1.00;AN=2;DP=<br>1;ExcessHet=0.0000;FS=0.0<br>00;MLEAC=1;MLEAF=0.5<br>00;MQ=60.00;QD=23.23;S<br>OR=1.609                                                                | GT<br>:A<br>D:<br>DP:<br>GQ<br>:PG<br>T:P<br>ID:<br>PL:<br>PS<br>GT<br>:A | 1 1:0,1<br>:1:3:1 <br>1:1799<br>_A_G:<br>45,3,0:<br>1799 | BA<br>.5 | no  |
| 19<br>17 | C<br>T | 30<br>1.0<br>6       | P<br>A<br>S<br>S | AC=2;AF=1.00;AN=2;DP=<br>13;ExcessHet=0.0000;FS=0.<br>000;MLEAC=2;MLEAF=1.<br>00;MQ=60.00;QD=27.37;S<br>OR=1.270                                                                | GT<br>:A<br>D:<br>DP:<br>GQ<br>:PL<br>GT<br>:A                            | 1/1:0,<br>11:11:<br>33:315<br>,33,0                      | BA<br>.5 | no  |
| 22<br>45 | C<br>A | 78.<br>32            | P<br>A<br>S<br>S | AC=2;AF=1.00;AN=2;DP=<br>2;ExcessHet=0.0000;FS=0.0<br>00;MLEAC=1;MLEAF=0.5<br>00;MQ=60.00;QD=27.24;S<br>OR=0.693                                                                | GT<br>:A<br>D:<br>DP:<br>GQ<br>:PG<br>T:P<br>ID:<br>PL:<br>PS<br>GT<br>:A | 1 1:0,2<br>:2:6:1 <br>1:2245<br>_C_A:<br>90,6,0:<br>2245 | BA<br>.5 | no  |
| 22<br>47 | G<br>T | 78.<br>32            | P<br>A           | AC=2;AF=1.00;AN=2;DP=<br>2;ExcessHet=0.0000;FS=0.0<br>00;MLEAC=1;MLEAF=0.5                                                                                                      | GT<br>:A<br>D:                                                            | 1 1:0,2<br>:2:6:1 <br>1:2245                             | BA<br>.5 | no  |

|    |     |     |   |                           |             |    |    |
|----|-----|-----|---|---------------------------|-------------|----|----|
|    |     |     | S | 00;MQ=60.00;QD=28.20;S    | DP: _C_A:   |    |    |
|    |     |     | S | OR=0.693                  | GQ 90,6,0:  |    |    |
|    |     |     |   |                           | :PG 2245    |    |    |
|    |     |     |   |                           | T:P         |    |    |
|    |     |     |   |                           | ID:         |    |    |
|    |     |     |   |                           | PL:         |    |    |
|    |     |     |   |                           | PS          |    |    |
|    |     |     |   |                           | GT          |    |    |
|    |     |     |   |                           | :A          |    |    |
|    |     |     |   |                           | D: 1 1:0,2  |    |    |
| 22 | G A | 78. | P | AC=2;AF=1.00;AN=2;DP=     | DP: :2:6:1  |    |    |
| 50 |     | 32  | A | 2;ExcessHet=0.0000;FS=0.0 | GQ 1:2245   | BA | no |
|    |     |     | S | 00;MLEAC=1;MLEAF=0.5      | :PG _C_A:   | .5 |    |
|    |     |     | S | 00;MQ=60.00;QD=25.00;S    | T:P 90,6,0: |    |    |
|    |     |     |   | OR=0.693                  | ID: 2245    |    |    |
|    |     |     |   |                           | PL:         |    |    |
|    |     |     |   |                           | PS          |    |    |
|    |     |     |   |                           | GT          |    |    |
|    |     |     |   |                           | :A          |    |    |
|    |     |     |   |                           | D: 1 1:0,2  |    |    |
| 22 | C G | 78. | P | AC=2;AF=1.00;AN=2;DP=     | DP: :2:6:1  |    |    |
| 52 |     | 32  | A | 2;ExcessHet=0.0000;FS=0.0 | GQ 1:2245   | BA | no |
|    |     |     | S | 00;MLEAC=1;MLEAF=0.5      | :PG _C_A:   | .5 |    |
|    |     |     | S | 00;MQ=60.00;QD=29.56;S    | T:P 90,6,0: |    |    |
|    |     |     |   | OR=0.693                  | ID: 2245    |    |    |
|    |     |     |   |                           | PL:         |    |    |
|    |     |     |   |                           | PS          |    |    |
|    |     |     |   |                           | GT          |    |    |
|    |     |     |   |                           | :A          |    |    |
|    |     |     |   |                           | D: 1 1:0,1  |    |    |
| 24 | A T | 35. | P | AC=2;AF=1.00;AN=2;DP=     | DP: :1:3:1  |    |    |
| 44 |     | 48  | A | 1;ExcessHet=0.0000;FS=0.0 | GQ 1:2444   | BA | no |
|    |     |     | S | 00;MLEAC=1;MLEAF=0.5      | :PG _A_T:   | .5 |    |
|    |     |     | S | 00;MQ=60.00;QD=29.03;S    | T:P 45,3,0: |    |    |
|    |     |     |   | OR=1.609                  | ID: 2444    |    |    |
|    |     |     |   |                           | PL:         |    |    |
|    |     |     |   |                           | PS          |    |    |
|    |     |     |   |                           | GT          |    |    |
|    |     |     |   |                           | :A 1 1:0,1  |    |    |
|    |     |     |   |                           | D: :1:3:1   |    |    |
| 24 | C T | 35. | P | AC=2;AF=1.00;AN=2;DP=     | DP: 1:2450  | BA | no |
| 50 |     | 48  | A | 1;ExcessHet=0.0000;FS=0.0 | GQ _C_T:    | .5 |    |
|    |     |     | S | 00;MLEAC=1;MLEAF=0.5      | :PG 45,3,0: |    |    |
|    |     |     | S | 00;MQ=60.00;QD=28.73;S    | T:P 2450    |    |    |
|    |     |     |   | OR=1.609                  | ID:         |    |    |

|    |   |   |     |   |                           |     |         |    |  |     |
|----|---|---|-----|---|---------------------------|-----|---------|----|--|-----|
| 25 | A | T | 35. | P | AC=2;AF=1.00;AN=2;DP=     | PL: |         |    |  |     |
| 42 |   |   | 48  | A | 1;ExcessHet=0.0000;FS=0.0 | PS  |         |    |  |     |
|    |   |   |     | S | 00;MLEAC=1;MLEAF=0.5      | GT  |         |    |  |     |
|    |   |   |     | S | 00;MQ=60.00;QD=34.42;S    | :A  | 1 1:0,1 |    |  |     |
|    |   |   |     |   | OR=1.609                  | D:  | :1:3:1  |    |  |     |
|    |   |   |     |   |                           | DP: | 1:2532  | BA |  | yes |
|    |   |   |     |   |                           | GQ  | _TTG    | .5 |  |     |
|    |   |   |     |   |                           | :PG | TC_T:   |    |  |     |
|    |   |   |     |   |                           | T:P | 45,3,0: |    |  |     |
|    |   |   |     |   |                           | ID: | 2532    |    |  |     |
|    |   |   |     |   |                           | PL: |         |    |  |     |
|    |   |   |     |   |                           | PS  |         |    |  |     |
|    |   |   |     |   | AC=2;AF=1.00;AN=2;Base    |     |         |    |  |     |
|    |   |   |     |   | QRankSum=-                | GT  | 1/1:6,  |    |  |     |
|    |   |   |     |   | 1.562e+00;DP=5481;Excess  | :A  | 5249:5  |    |  |     |
| 27 | C | T | 20  | P | Het=0.0000;FS=0.000;MLE   | D:  | 300:99  | BA |  | yes |
| 10 |   |   | 17. | A | AC=2;MLEAF=1.00;MQ=6      | DP: | :20103  | .5 |  |     |
|    |   |   | 1   | S | 0.00;MQRankSum=-2.840e-   | GQ  | 1,1487  |    |  |     |
|    |   |   |     | S | 01;QD=27.24;ReadPosRank   | :PL | 4,0     |    |  |     |
|    |   |   |     |   | Sum=-                     |     |         |    |  |     |
|    |   |   |     |   | 1.641e+00;SOR=0.434       |     |         |    |  |     |
|    |   |   |     |   | AC=2;AF=1.00;AN=2;Base    |     |         |    |  |     |
|    |   |   |     |   | QRankSum=-5.310e-         | GT  | 1/1:1,  |    |  |     |
|    |   |   |     |   | 01;DP=5275;ExcessHet=0.0  | :A  | 4995:5  |    |  |     |
| 27 | C | T | 19  | P | 000;FS=0.000;MLEAC=2;     | D:  | 000:99  | BA |  | yes |
| 90 |   |   | 31  | A | MLEAF=1.00;MQ=60.00;M     | DP: | :19313  | .5 |  |     |
|    |   |   | 22. | S | QRankSum=-5.690e-         | GQ  | 6,1514  |    |  |     |
|    |   |   | 1   | S | 01;QD=28.20;ReadPosRank   | :PL | 7,0     |    |  |     |
|    |   |   |     |   | Sum=1.75;SOR=0.262        |     |         |    |  |     |
|    |   |   |     |   | AC=1;AF=0.500;AN=2;Bas    | GT  |         |    |  |     |
|    |   |   |     |   | eQRankSum=-6.740e-        | :A  | 0 1:1,1 |    |  |     |
|    |   |   |     |   | 01;DP=2;ExcessHet=0.0000  | D:  | :2:39:  |    |  |     |
| 28 | C | A | 31. | P | ;FS=0.000;MLEAC=1;MLE     | DP: | 0 1:28  | BA |  | no  |
| 22 |   |   | 64  | A | AF=0.500;MQ=60.00;MQR     | GQ  | 21_A_   | .5 |  |     |
|    |   |   |     | S | ankSum=0.00;QD=15.82;Re   | :PG | AT:39   |    |  |     |
|    |   |   |     | S | adPosRankSum=-6.740e-     | T:P | ,0,39:2 |    |  |     |
|    |   |   |     |   | 01;SOR=0.693              | ID: | 821     |    |  |     |
|    |   |   |     |   |                           | PL: |         |    |  |     |
|    |   |   |     |   |                           | PS  |         |    |  |     |
|    |   |   |     |   | AC=2;AF=1.00;AN=2;Base    | GT  | 1/1:2,  |    |  |     |
|    |   |   |     |   | QRankSum=-6.890e-         | :A  | 5586:5  |    |  |     |
| 30 | C | T | 21  | P | 01;DP=5743;ExcessHet=0.0  | D:  | 588:99  | BA |  | yes |
| 37 |   |   | 48  | A | 000;FS=0.000;MLEAC=2;     | DP: | :21485  | .5 |  |     |
|    |   |   | 44. | S | MLEAF=1.00;MQ=60.00;M     | GQ  | 8,1675  |    |  |     |
|    |   |   | 1   | S | QRankSum=-5.660e-         | :PL | 4,0     |    |  |     |

|    |   |   |     |                                               |                                                                              |     |         |    |
|----|---|---|-----|-----------------------------------------------|------------------------------------------------------------------------------|-----|---------|----|
|    |   |   |     | 01;QD=25.00;ReadPosRank<br>Sum=2.26;SOR=0.142 |                                                                              |     |         |    |
| 35 | T | C | 64. | P                                             | AC=1;AF=0.500;AN=2;Bas<br>eQRankSum=0.00;DP=6;Ex<br>cessHet=0.0000;FS=0.000; | GT  |         |    |
| 37 |   |   | 64  | A                                             | MLEAC=1;MLEAF=0.500;                                                         | :A  | 0 1:4,2 |    |
|    |   |   |     | S                                             | MQ=60.00;MQRankSum=0.                                                        | D:  | :6:72:  |    |
|    |   |   |     | S                                             | 00;QD=10.77;ReadPosRank<br>Sum=-                                             | DP: | 0 1:35  | BA |
|    |   |   |     |                                               | 1.834e+00;SOR=0.693                                                          | GQ  | 37_T_   | .5 |
|    |   |   |     |                                               |                                                                              | :PG | C:72,0  | no |
|    |   |   |     |                                               |                                                                              | T:P | ,162:3  |    |
|    |   |   |     |                                               |                                                                              | ID: | 537     |    |
|    |   |   |     |                                               |                                                                              | PL: |         |    |
|    |   |   |     |                                               |                                                                              | PS  |         |    |
|    |   |   |     |                                               |                                                                              | GT  |         |    |
| 35 | G | A | 64. | P                                             | AC=1;AF=0.500;AN=2;Bas<br>eQRankSum=0.00;DP=6;Ex<br>cessHet=0.0000;FS=0.000; | :A  | 0 1:4,2 |    |
| 39 |   |   | 64  | A                                             | MLEAC=1;MLEAF=0.500;                                                         | D:  | :6:72:  |    |
|    |   |   |     | S                                             | MQ=60.00;MQRankSum=0.                                                        | DP: | 0 1:35  | BA |
|    |   |   |     | S                                             | 00;QD=10.77;ReadPosRank<br>Sum=-                                             | GQ  | 37_T_   | .5 |
|    |   |   |     |                                               | 1.834e+00;SOR=0.693                                                          | :PG | C:72,0  | no |
|    |   |   |     |                                               |                                                                              | T:P | ,162:3  |    |
|    |   |   |     |                                               |                                                                              | ID: | 537     |    |
|    |   |   |     |                                               |                                                                              | PL: |         |    |
|    |   |   |     |                                               |                                                                              | PS  |         |    |
|    |   |   |     |                                               |                                                                              | GT  |         |    |
| 37 | C | A | 37. | P                                             | AC=2;AF=1.00;AN=2;DP=<br>2;ExcessHet=0.0000;FS=0.0                           | :A  | 1 1:0,  | BA |
| 73 |   |   | 32  | A                                             | 00;MLEAC=1;MLEAF=0.5                                                         | D:  | 2:2:6:  | .5 |
|    |   |   |     | S                                             | 00;MQ=60.00;QD=18.66;S                                                       | DP: | 49,6,0  | no |
|    |   |   |     | S                                             | OR=0.693                                                                     | GQ  |         |    |
|    |   |   |     |                                               |                                                                              | :PL |         |    |
|    |   |   |     |                                               |                                                                              | GT  |         |    |
|    |   |   |     |                                               |                                                                              | :A  |         |    |
|    |   |   |     |                                               |                                                                              | D:  | 1 1:0,1 |    |
| 39 | T | A | 35. | P                                             | AC=2;AF=1.00;AN=2;DP=<br>1;ExcessHet=0.0000;FS=0.0                           | DP: | :1:3:1  | BA |
| 49 |   |   | 48  | A                                             | 00;MLEAC=1;MLEAF=0.5                                                         | GQ  | 1:3949  | .5 |
|    |   |   |     | S                                             | 00;MQ=60.00;QD=28.53;S                                                       | :PG | _T_A:   | no |
|    |   |   |     | S                                             | OR=1.609                                                                     | T:P | 45,3,0: |    |
|    |   |   |     |                                               |                                                                              | ID: | 3949    |    |
|    |   |   |     |                                               |                                                                              | PL: |         |    |
|    |   |   |     |                                               |                                                                              | PS  |         |    |
|    |   |   |     |                                               |                                                                              | GT  |         |    |
|    |   |   |     |                                               |                                                                              | :A  | 1 1:0,1 |    |
| 39 | G | A | 35. | P                                             | AC=2;AF=1.00;AN=2;DP=<br>1;ExcessHet=0.0000;FS=0.0                           | D:  | :1:3:1  | BA |
| 50 |   |   | 48  | A                                             | 00;MLEAC=1;MLEAF=0.5                                                         | DP: | 1:3949  | .5 |
|    |   |   |     | S                                             | 00;MQ=60.00;QD=27.23;S                                                       | GQ  | _T_A:   | no |
|    |   |   |     | S                                             | OR=1.609                                                                     | :PG | 45,3,0: |    |
|    |   |   |     |                                               |                                                                              | T:P | 3949    |    |
|    |   |   |     |                                               |                                                                              | ID: |         |    |

|    |   |   |     |   |                           |             |    |    |  |
|----|---|---|-----|---|---------------------------|-------------|----|----|--|
| 39 | T | A | 35. | P | AC=2;AF=1.00;AN=2;DP=     | PL:         |    |    |  |
| 67 |   |   | 48  | A | 1;ExcessHet=0.0000;FS=0.0 | PS          |    |    |  |
|    |   |   |     | S | 00;MLEAC=1;MLEAF=0.5      | GT          |    |    |  |
|    |   |   |     | S | 00;MQ=60.00;QD=28.17;S    | :A          |    |    |  |
|    |   |   |     |   | OR=1.609                  | D: 1 1:0,1  |    |    |  |
|    |   |   |     |   |                           | DP: :1:3:1  |    |    |  |
|    |   |   |     |   |                           | GQ 1:3967   | BA |    |  |
|    |   |   |     |   |                           | :PG _T_A:   | .5 | no |  |
|    |   |   |     |   |                           | T:P 45,3,0: |    |    |  |
|    |   |   |     |   |                           | ID: 3967    |    |    |  |
|    |   |   |     |   |                           | PL:         |    |    |  |
|    |   |   |     |   |                           | PS          |    |    |  |
|    |   |   |     |   |                           | GT          |    |    |  |
|    |   |   |     |   |                           | :A          |    |    |  |
| 39 | G | T | 35. | P | AC=2;AF=1.00;AN=2;DP=     | D: 1 1:0,1  |    |    |  |
| 69 |   |   | 48  | A | 1;ExcessHet=0.0000;FS=0.0 | DP: :1:3:1  |    |    |  |
|    |   |   |     | S | 00;MLEAC=1;MLEAF=0.5      | GQ 1:3967   | BA |    |  |
|    |   |   |     | S | 00;MQ=60.00;QD=26.80;S    | :PG _T_A:   | .5 | no |  |
|    |   |   |     |   | OR=1.609                  | T:P 45,3,0: |    |    |  |
|    |   |   |     |   |                           | ID: 3967    |    |    |  |
|    |   |   |     |   |                           | PL:         |    |    |  |
|    |   |   |     |   |                           | PS          |    |    |  |
|    |   |   |     |   |                           | GT          |    |    |  |
|    |   |   |     |   |                           | :A          |    |    |  |
| 39 | T | A | 35. | P | AC=2;AF=1.00;AN=2;DP=     | D: 1 1:0,1  |    |    |  |
| 70 |   |   | 48  | A | 1;ExcessHet=0.0000;FS=0.0 | DP: :1:3:1  |    |    |  |
|    |   |   |     | S | 00;MLEAC=1;MLEAF=0.5      | GQ 1:3967   | BA |    |  |
|    |   |   |     | S | 00;MQ=60.00;QD=26.00;S    | :PG _T_A:   | .5 | no |  |
|    |   |   |     |   | OR=1.609                  | T:P 45,3,0: |    |    |  |
|    |   |   |     |   |                           | ID: 3967    |    |    |  |
|    |   |   |     |   |                           | PL:         |    |    |  |
|    |   |   |     |   |                           | PS          |    |    |  |
|    |   |   |     |   |                           | GT          |    |    |  |
|    |   |   |     |   |                           | :A          |    |    |  |
| 39 | G | A | 35. | P | AC=2;AF=1.00;AN=2;DP=     | D: 1 1:0,1  |    |    |  |
| 71 |   |   | 48  | A | 1;ExcessHet=0.0000;FS=0.0 | DP: :1:3:1  |    |    |  |
|    |   |   |     | S | 00;MLEAC=1;MLEAF=0.5      | GQ 1:3967   | BA |    |  |
|    |   |   |     | S | 00;MQ=60.00;QD=30.02;S    | :PG _T_A:   | .5 | no |  |
|    |   |   |     |   | OR=1.609                  | T:P 45,3,0: |    |    |  |
|    |   |   |     |   |                           | ID: 3967    |    |    |  |
|    |   |   |     |   |                           | PL:         |    |    |  |
|    |   |   |     |   |                           | PS          |    |    |  |
|    |   |   |     |   |                           | GT          |    |    |  |
|    |   |   |     |   |                           | :A          |    |    |  |
| 39 | A | G | 78. | P | AC=2;AF=1.00;AN=2;DP=     | GT 1 1:0,2  |    |    |  |
| 89 |   |   | 32  | A | 2;ExcessHet=0.0000;FS=0.0 | :A :2:6:1   | BA |    |  |
|    |   |   |     | S | 00;MLEAC=1;MLEAF=0.5      | D: 1:3989   | .5 | no |  |
|    |   |   |     | S |                           | DP: _A_G:   |    |    |  |



|          |     |                      |                  |                                                                                                                                                                                                |                                                                                                                                                                                                                                                                                           |
|----------|-----|----------------------|------------------|------------------------------------------------------------------------------------------------------------------------------------------------------------------------------------------------|-------------------------------------------------------------------------------------------------------------------------------------------------------------------------------------------------------------------------------------------------------------------------------------------|
|          |     |                      |                  | 00;MQ=60.00;QD=31.98;S<br>OR=0.693                                                                                                                                                             | GQ 90,6,0:<br>:PG 3989<br>T:P<br>ID:<br>PL:<br>PS<br>GT<br>:A<br>D: 1 1:0,2<br>DP: :2:6:1 <br>GQ 1:3989 BA<br>:PG _A_G: .5 no<br>T:P 90,6,0:<br>ID: 3989<br>PL:<br>PS<br>GT<br>:A<br>D: 1 1:0,2<br>DP: :2:6:1 <br>GQ 1:3989 BA<br>:PG _A_G: .5 no<br>T:P 90,6,0:<br>ID: 3989<br>PL:<br>PS |
| 39<br>92 | C T | 78.<br>32            | P<br>A<br>S<br>S | AC=2;AF=1.00;AN=2;DP=<br>2;ExcessHet=0.0000;FS=0.0<br>00;MLEAC=1;MLEAF=0.5<br>00;MQ=60.00;QD=29.11;S<br>OR=0.693                                                                               |                                                                                                                                                                                                                                                                                           |
| 39<br>96 | A C | 78.<br>32            | P<br>A<br>S<br>S | AC=2;AF=1.00;AN=2;DP=<br>2;ExcessHet=0.0000;FS=0.0<br>00;MLEAC=1;MLEAF=0.5<br>00;MQ=60.00;QD=28.08;S<br>OR=0.693                                                                               |                                                                                                                                                                                                                                                                                           |
| 41<br>84 | G A | 19<br>63<br>61.<br>1 | P<br>A<br>S<br>S | AC=2;AF=1.00;AN=2;Base<br>QRankSum=-9.850e-<br>01;DP=5373;ExcessHet=0.0<br>000;FS=0.000;MLEAC=2;<br>MLEAF=1.00;MQ=60.00;M<br>QRankSum=0.00;QD=29.56<br>;ReadPosRankSum=0.770;S<br>OR=0.870     | GT 1/1:2,<br>:A 4481:4<br>D: 485:99 BA<br>DP: :19637 .5 yes<br>GQ 5,1546<br>:PL 0,0                                                                                                                                                                                                       |
| 42<br>99 | T G | 67.<br>64            | P<br>A<br>S<br>S | AC=1;AF=0.500;AN=2;Bas<br>eQRankSum=-5.240e-<br>01;DP=5;ExcessHet=0.0000<br>;FS=0.000;MLEAC=1;MLE<br>AF=0.500;MQ=60.00;MQR<br>ankSum=0.00;QD=13.53;Re<br>adPosRankSum=-<br>1.645e+00;SOR=0.368 | GT<br>:A<br>D: 0 1:3,2<br>DP: :5:75:<br>0 1:42<br>GQ 99_T_ BA<br>:PG G:75,0 .5 no<br>T:P ,120:4<br>ID: 299<br>PL:<br>PS                                                                                                                                                                   |
| 43<br>21 | C T | 18<br>51             | P<br>A           | AC=2;AF=1.00;AN=2;Base<br>QRankSum=4.10;DP=5184;                                                                                                                                               | GT 1/1:16 BA<br>:A ,4975: .5 yes                                                                                                                                                                                                                                                          |

|    |   |   |     |   |                           |        |         |    |    |
|----|---|---|-----|---|---------------------------|--------|---------|----|----|
|    |   |   | 32. | S | ExcessHet=0.0000;FS=0.00  | D:     | 4998:9  |    |    |
|    |   |   | 1   | S | 0;MLEAC=2;MLEAF=1.00;     | DP:    | 9:1851  |    |    |
|    |   |   |     |   | MQ=60.00;MQRankSum=0.     | GQ     | 46,141  |    |    |
|    |   |   |     |   | 141;QD=30.62;ReadPosRan   | :PL    | 14,0    |    |    |
|    |   |   |     |   | kSum=5.64;SOR=0.130       |        |         |    |    |
|    |   |   |     |   |                           | GT     |         |    |    |
|    |   |   |     |   |                           | :A     | 1 1:0,4 |    |    |
|    |   |   |     |   |                           | D:     | 490:44  |    |    |
|    |   |   |     |   |                           | DP:    | 90:99:  |    |    |
| 43 | C | A | 17  | P | AC=2;AF=1.00;AN=2;DP=     | DP:    | 1 1:43  | BA | no |
| 91 |   |   | 80  | A | 4576;ExcessHet=0.0000;FS  | GQ     | 21_C_   | .5 |    |
|    |   |   | 83. | S | =0.000;MLEAC=2;MLEAF      | :PG    | T:178   |    |    |
|    |   |   | 1   | S | =1.00;MQ=60.00;QD=29.56   | T:P    | 097,13  |    |    |
|    |   |   |     |   | ;SOR=0.986                | ID:    | 500,0:  |    |    |
|    |   |   |     |   |                           | PL:    | 4321    |    |    |
|    |   |   |     |   |                           | PS     |         |    |    |
|    |   |   |     |   |                           | GT     |         |    |    |
|    |   |   |     |   | AC=1;AF=0.500;AN=2;Bas    | :A     | 0 1:1,1 |    |    |
|    |   |   |     |   | eQRankSum=-6.740e-        | :2:39: |         |    |    |
|    |   |   |     |   | 01;DP=2;ExcessHet=0.0000  | D:     | 0 1:44  |    |    |
| 44 | G | C | 31. | P | ;FS=0.000;MLEAC=1;MLE     | DP:    | 46_A_   | BA | no |
| 54 |   |   | 64  | A | AF=0.500;MQ=60.00;MQR     | GQ     | AACT    | .5 |    |
|    |   |   |     | S | ankSum=0.00;QD=15.82;Re   | :PG    | GTGA    |    |    |
|    |   |   |     | S | adPosRankSum=-6.740e-     | T:P    | GTC:3   |    |    |
|    |   |   |     |   | 01;SOR=0.693              | ID:    | 9,0,39: |    |    |
|    |   |   |     |   |                           | PL:    | 4446    |    |    |
|    |   |   |     |   |                           | PS     |         |    |    |
|    |   |   |     |   |                           | GT     |         |    |    |
|    |   |   |     |   |                           | :A     |         |    |    |
|    |   |   |     |   |                           | D:     | 1 1:0,2 |    |    |
| 45 | G | C | 78. | P | AC=2;AF=1.00;AN=2;DP=     | DP:    | :2:6:1  | BA | no |
| 02 |   |   | 32  | A | 2;ExcessHet=0.0000;FS=0.0 | GQ     | 1:4502  | .5 |    |
|    |   |   |     | S | 00;MLEAC=1;MLEAF=0.5      | :PG    | _G_C:   |    |    |
|    |   |   |     | S | 00;MQ=60.00;QD=29.52;S    | T:P    | 90,6,0: |    |    |
|    |   |   |     |   | OR=0.693                  | ID:    | 4502    |    |    |
|    |   |   |     |   |                           | PL:    |         |    |    |
|    |   |   |     |   |                           | PS     |         |    |    |
|    |   |   |     |   |                           | GT     |         |    |    |
|    |   |   |     |   |                           | :A     |         |    |    |
|    |   |   |     |   |                           | D:     | 1 1:0,2 |    |    |
| 45 | G | A | 78. | P | AC=2;AF=1.00;AN=2;DP=     | DP:    | :2:6:1  | BA | no |
| 05 |   |   | 32  | A | 2;ExcessHet=0.0000;FS=0.0 | GQ     | 1:4502  | .5 |    |
|    |   |   |     | S | 00;MLEAC=1;MLEAF=0.5      | :PG    | _G_C:   |    |    |
|    |   |   |     | S | 00;MQ=60.00;QD=33.47;S    | T:P    | 90,6,0: |    |    |
|    |   |   |     |   | OR=0.693                  | ID:    | 4502    |    |    |
|    |   |   |     |   |                           | PL:    |         |    |    |
|    |   |   |     |   |                           | PS     |         |    |    |

|    |   |   |     |   |                           |             |         |    |  |
|----|---|---|-----|---|---------------------------|-------------|---------|----|--|
| 45 | G | A | 78. | P | AC=2;AF=1.00;AN=2;DP=     | GT          |         |    |  |
| 11 |   |   | 32  | A | 2;ExcessHet=0.0000;FS=0.0 | :A          |         |    |  |
|    |   |   |     | S | 00;MLEAC=1;MLEAF=0.5      | D: 1 1:0,2  |         |    |  |
|    |   |   |     | S | 00;MQ=60.00;QD=32.91;S    | DP: :2:6:1  |         |    |  |
|    |   |   |     |   | OR=0.693                  | GQ 1:4502   | BA      | no |  |
|    |   |   |     |   |                           | :PG _G_C:   | .5      |    |  |
|    |   |   |     |   |                           | T:P 90,6,0: |         |    |  |
|    |   |   |     |   |                           | ID: 4502    |         |    |  |
|    |   |   |     |   |                           | PL:         |         |    |  |
|    |   |   |     |   |                           | PS          |         |    |  |
| 46 | T | A | 64. | P | AC=1;AF=0.500;AN=2;Bas    | GT          |         |    |  |
| 95 |   |   | 64  | A | eQRankSum=0.00;DP=6;Ex    | :A 0/1:4,   |         |    |  |
|    |   |   |     | S | cessHet=0.0000;FS=0.000;  | D: 2:6:72   | BA      | no |  |
|    |   |   |     | S | MQ=60.00;MQRankSum=0.     | DP: :72,0,1 | .5      |    |  |
|    |   |   |     |   | 00;QD=10.77;ReadPosRank   | GQ 62       |         |    |  |
|    |   |   |     |   | Sum=-                     | :PL         |         |    |  |
|    |   |   |     |   | 1.834e+00;SOR=0.693       |             |         |    |  |
| 47 | C | G | 70. | P | AC=1;AF=0.500;AN=2;DP     | GT          | 0 1:2,2 |    |  |
| 03 |   |   | 64  | A | =4;ExcessHet=0.0000;FS=0. | :A :4:38:   |         |    |  |
|    |   |   |     | S | 000;MLEAC=1;MLEAF=0.      | D: 0 1:46   |         |    |  |
|    |   |   |     | S | 500;MQ=60.00;MQRankSu     | DP: 99_T_   |         |    |  |
|    |   |   |     |   | m=0.00;QD=17.66;SOR=0.    | GQ TTGA     | BA      | no |  |
|    |   |   |     |   | 693                       | :PG GGG     | .5      |    |  |
|    |   |   |     |   |                           | T:P AAA     |         |    |  |
|    |   |   |     |   |                           | ID: ACA     |         |    |  |
|    |   |   |     |   |                           | PL: GGG:    |         |    |  |
|    |   |   |     |   |                           | PS 78,0,3   |         |    |  |
|    |   |   |     |   |                           |             |         |    |  |
|    |   |   |     |   |                           |             |         |    |  |
| 47 | C | T | 78. | P | AC=2;AF=1.00;AN=2;DP=     | GT          | 1 1:0,2 |    |  |
| 04 |   |   | 32  | A | 2;ExcessHet=0.0000;FS=0.0 | :A :2:6:1   |         |    |  |
|    |   |   |     | S | 00;MLEAC=1;MLEAF=0.5      | D: 1:4699   |         |    |  |
|    |   |   |     | S | 00;MQ=60.00;QD=31.45;S    | DP: _T_T    |         |    |  |
|    |   |   |     |   | OR=0.693                  | GQ TGAG     | BA      | no |  |
|    |   |   |     |   |                           | :PG GGA     | .5      |    |  |
|    |   |   |     |   |                           | T:P AAA     |         |    |  |
|    |   |   |     |   |                           | ID: CAG     |         |    |  |
|    |   |   |     |   |                           | PL: GG:90   |         |    |  |
|    |   |   |     |   |                           | PS ,6,0:46  |         |    |  |
|    |   |   |     |   |                           |             |         |    |  |
|    |   |   |     |   |                           |             |         |    |  |
| 47 | G | C | 78. | P | AC=2;AF=1.00;AN=2;DP=     | GT          | 1 1:0,2 |    |  |
| 06 |   |   | 32  | A | 2;ExcessHet=0.0000;FS=0.0 | :A :2:6:1   |         |    |  |
|    |   |   |     | S | 00;MLEAC=1;MLEAF=0.5      | D: 1:4699   | BA      | no |  |
|    |   |   |     | S | 00;MQ=60.00;QD=33.27;S    | DP: _T_T    | .5      |    |  |
|    |   |   |     |   | OR=0.693                  | GQ TGAG     |         |    |  |
|    |   |   |     |   |                           | :PG GGA     |         |    |  |

|    |   |   |     |   |                           |  |  |  |     |         |    |  |    |
|----|---|---|-----|---|---------------------------|--|--|--|-----|---------|----|--|----|
|    |   |   |     |   |                           |  |  |  | T:P | AAA     |    |  |    |
|    |   |   |     |   |                           |  |  |  | ID: | CAG     |    |  |    |
|    |   |   |     |   |                           |  |  |  | PL: | GG:90   |    |  |    |
|    |   |   |     |   |                           |  |  |  | PS  | ,6,0:46 |    |  |    |
|    |   |   |     |   |                           |  |  |  |     | 99      |    |  |    |
|    |   |   |     |   |                           |  |  |  | GT  |         |    |  |    |
| 48 | C | T | 31. | P |                           |  |  |  | :A  | 0/1:13  |    |  |    |
| 15 |   |   | 64  | A | AC=1;AF=0.500;AN=2;Bas    |  |  |  | D:  | ,2:15:  | BA |  |    |
|    |   |   |     | S | eQRankSum=2.36;DP=15;E    |  |  |  | DP: | 39:39,  | .5 |  | no |
|    |   |   |     | S | xcessHet=0.0000;FS=3.310; |  |  |  | GQ  | 0,315   |    |  |    |
|    |   |   |     |   | MLEAC=1;MLEAF=0.500;      |  |  |  | :PL |         |    |  |    |
|    |   |   |     |   | MQ=60.00;MQRankSum=0.     |  |  |  |     |         |    |  |    |
|    |   |   |     |   | 00;QD=2.11;ReadPosRankS   |  |  |  |     |         |    |  |    |
|    |   |   |     |   | um=1.62;SOR=2.279         |  |  |  |     |         |    |  |    |
|    |   |   |     |   |                           |  |  |  | GT  | 0 1:2,2 |    |  |    |
|    |   |   |     |   |                           |  |  |  | :A  | :4:78:  |    |  |    |
| 49 | A | G | 70. | P | AC=1;AF=0.500;AN=2;Bas    |  |  |  | D:  | 0 1:49  |    |  |    |
| 26 |   |   | 64  | A | eQRankSum=0.00;DP=4;Ex    |  |  |  | DP: | 22_T_   |    |  |    |
|    |   |   |     | S | cessHet=0.0000;FS=0.000;  |  |  |  | GQ  | TGAT    | BA |  |    |
|    |   |   |     | S | MLEAC=1;MLEAF=0.500;      |  |  |  | :PG | TTCA    | .5 |  | no |
|    |   |   |     |   | MQ=60.00;MQRankSum=0.     |  |  |  | T:P | GAG     |    |  |    |
|    |   |   |     |   | 00;QD=17.66;ReadPosRank   |  |  |  | ID: | AGC:    |    |  |    |
|    |   |   |     |   | Sum=-                     |  |  |  | PL: | 78,0,7  |    |  |    |
|    |   |   |     |   | 1.383e+00;SOR=0.693       |  |  |  | PS  | 8:4922  |    |  |    |
|    |   |   |     |   |                           |  |  |  | GT  | 0 1:2,2 |    |  |    |
|    |   |   |     |   |                           |  |  |  | :A  | :4:78:  |    |  |    |
| 49 | A | G | 70. | P | AC=1;AF=0.500;AN=2;Bas    |  |  |  | D:  | 0 1:49  |    |  |    |
| 28 |   |   | 64  | A | eQRankSum=0.00;DP=6;Ex    |  |  |  | DP: | 22_T_   |    |  |    |
|    |   |   |     | S | cessHet=0.0000;FS=0.000;  |  |  |  | GQ  | TGAT    | BA |  |    |
|    |   |   |     | S | MLEAC=1;MLEAF=0.500;      |  |  |  | :PG | TTCA    | .5 |  | no |
|    |   |   |     |   | MQ=60.00;MQRankSum=0.     |  |  |  | T:P | GAG     |    |  |    |
|    |   |   |     |   | 00;QD=17.66;ReadPosRank   |  |  |  | ID: | AGC:    |    |  |    |
|    |   |   |     |   | Sum=-                     |  |  |  | PL: | 78,0,7  |    |  |    |
|    |   |   |     |   | 1.383e+00;SOR=0.693       |  |  |  | PS  | 8:4922  |    |  |    |
|    |   |   |     |   |                           |  |  |  | GT  | 0 1:2,2 |    |  |    |
|    |   |   |     |   |                           |  |  |  | :A  | :4:78:  |    |  |    |
| 53 | C | T | 65. | P | AC=1;AF=0.500;AN=2;Bas    |  |  |  | D:  | 0 1:49  |    |  |    |
| 10 |   |   | 64  | A | eQRankSum=0.00;DP=6;Ex    |  |  |  | DP: | 22_T_   |    |  |    |
|    |   |   |     | S | cessHet=0.0000;FS=0.000;  |  |  |  | GQ  | TGAT    | BA |  |    |
|    |   |   |     | S | MLEAC=1;MLEAF=0.500;      |  |  |  | :PG | TTCA    | .5 |  | no |
|    |   |   |     |   | MQ=60.00;MQRankSum=0.     |  |  |  | T:P | GAG     |    |  |    |
|    |   |   |     |   | 00;QD=10.94;ReadPosRank   |  |  |  | ID: | AGC:    |    |  |    |
|    |   |   |     |   | Sum=0.598;SOR=0.693       |  |  |  | PL: | 78,0,7  |    |  |    |
|    |   |   |     |   |                           |  |  |  | PS  | 8:4922  |    |  |    |
|    |   |   |     |   |                           |  |  |  | GT  |         |    |  |    |
|    |   |   |     |   |                           |  |  |  | :A  | 0/1:3,  |    |  |    |
|    |   |   |     |   |                           |  |  |  | D:  | 3:6:73  | BA |  |    |
|    |   |   |     |   |                           |  |  |  | DP: | :73,0,7 | .5 |  | no |
|    |   |   |     |   |                           |  |  |  | GQ  | 3       |    |  |    |
|    |   |   |     |   |                           |  |  |  | :PL |         |    |  |    |
|    |   |   |     |   |                           |  |  |  | GT  | 0 1:7,2 |    |  |    |
|    |   |   |     |   |                           |  |  |  | :A  | :9:63:  |    |  |    |
| 53 | C | T | 55. | P | AC=1;AF=0.500;AN=2;Bas    |  |  |  | D:  | 0 1:53  |    |  |    |
| 14 |   |   | 64  | A | eQRankSum=-2.820e-        |  |  |  | DP: | 14_C_   |    |  |    |
|    |   |   |     | S | 01;DP=9;ExcessHet=0.0000  |  |  |  | GQ  | T:63,0  | BA |  |    |
|    |   |   |     | S | ;FS=0.000;MLEAC=1;MLE     |  |  |  | :PG | ,288:5  | .5 |  | no |
|    |   |   |     |   | AF=0.500;MQ=60.00;MQR     |  |  |  | T:P | 314     |    |  |    |
|    |   |   |     |   | ankSum=0.00;QD=6.18;Rea   |  |  |  |     |         |    |  |    |

|          |     |                |                  |                                                                                                                                                              |                                                                                                                                                                                                                                       |                                                               |          |    |
|----------|-----|----------------|------------------|--------------------------------------------------------------------------------------------------------------------------------------------------------------|---------------------------------------------------------------------------------------------------------------------------------------------------------------------------------------------------------------------------------------|---------------------------------------------------------------|----------|----|
|          |     |                |                  | dPosRankSum=-8.120e-01;SOR=0.495                                                                                                                             | ID:<br>PL:<br>PS<br>GT                                                                                                                                                                                                                |                                                               |          |    |
| 55<br>19 | T G | 37.<br>32      | P<br>A<br>S<br>S | AC=2;AF=1.00;AN=2;DP=2;ExcessHet=0.0000;FS=0.00;MLEAC=1;MLEAF=0.500;MQ=60.00;QD=18.66;SOR=0.693                                                              | :A<br>D:<br>DP:<br>GQ<br>:PL<br>GT<br>:A<br>D:<br>DP:<br>GQ<br>:PG<br>T:P<br>ID:<br>PL:<br>PS<br>GT<br>:A<br>D:<br>DP:<br>GQ<br>:PG<br>T:P<br>ID:<br>PL:<br>PS<br>GT<br>:A<br>D:<br>DP:<br>GQ<br>:PG<br>T:P<br>ID:<br>PL:<br>PS<br>GT | 1 1:0,<br>2:2:6:<br>49,6,0                                    | BA<br>.5 | no |
| 55<br>74 | A G | 78.<br>32      | P<br>A<br>S<br>S | AC=2;AF=1.00;AN=2;DP=2;ExcessHet=0.0000;FS=0.00;MLEAC=1;MLEAF=0.500;MQ=60.00;QD=27.08;SOR=0.693                                                              | :A<br>D:<br>DP:<br>GQ<br>:PG<br>T:P<br>ID:<br>PL:<br>PS<br>GT<br>:A<br>D:<br>DP:<br>GQ<br>:PG<br>T:P<br>ID:<br>PL:<br>PS<br>GT<br>:A<br>D:<br>DP:<br>GQ<br>:PG<br>T:P<br>ID:<br>PL:<br>PS<br>GT                                       | 1 1:0,2<br>:2:6:1 <br>1:5566<br>_T_T<br>G:90,6<br>,0:556<br>6 | BA<br>.5 | no |
| 55<br>75 | C T | 78.<br>32      | P<br>A<br>S<br>S | AC=2;AF=1.00;AN=2;DP=2;ExcessHet=0.0000;FS=0.00;MLEAC=1;MLEAF=0.500;MQ=60.00;QD=25.42;SOR=0.693                                                              | :A<br>D:<br>DP:<br>GQ<br>:PG<br>T:P<br>ID:<br>PL:<br>PS<br>GT<br>:A<br>D:<br>DP:<br>GQ<br>:PG<br>T:P<br>ID:<br>PL:<br>PS<br>GT<br>:A<br>D:<br>DP:<br>GQ<br>:PG<br>T:P<br>ID:<br>PL:<br>PS<br>GT                                       | 1 1:0,2<br>:2:6:1 <br>1:5566<br>_T_T<br>G:90,6<br>,0:556<br>6 | BA<br>.5 | no |
| 55<br>76 | A G | 78.<br>32      | P<br>A<br>S<br>S | AC=2;AF=1.00;AN=2;DP=2;ExcessHet=0.0000;FS=0.00;MLEAC=1;MLEAF=0.500;MQ=60.00;QD=27.65;SOR=0.693                                                              | :A<br>D:<br>DP:<br>GQ<br>:PG<br>T:P<br>ID:<br>PL:<br>PS<br>GT<br>:A<br>D:<br>DP:<br>GQ<br>:PG<br>T:P<br>ID:<br>PL:<br>PS<br>GT<br>:A<br>D:<br>DP:<br>GQ<br>:PG<br>T:P<br>ID:<br>PL:<br>PS<br>GT                                       | 1 1:0,2<br>:2:6:1 <br>1:5566<br>_T_T<br>G:90,6<br>,0:556<br>6 | BA<br>.5 | no |
| 57<br>65 | G A | 25<br>1.6<br>4 | P<br>A<br>S<br>S | AC=1;AF=0.500;AN=2;BaseQRankSum=1.79;DP=47;ExcessHet=0.0000;FS=0.000;MLEAC=1;MLEAF=0.500;MQ=60.00;MQRankSum=0.00;QD=5.59;ReadPosRankSum=-4.345e+00;SOR=0.892 | GT<br>:A<br>D:<br>DP:<br>GQ<br>:PG<br>T:P<br>ID:<br>PL:<br>PS<br>GT<br>:A<br>D:<br>DP:<br>GQ<br>:PG<br>T:P<br>ID:<br>PL:<br>PS<br>GT<br>:A<br>D:<br>DP:<br>GQ<br>:PG<br>T:P<br>ID:<br>PL:<br>PS<br>GT                                 | 0 1:36,<br>9:45:9<br>9:0 1:5<br>765_G<br>_A:25<br>9,0,14      | BA<br>.5 | no |

|    |     |     |   |                                                                                                                                                               |                                                                                                                              |
|----|-----|-----|---|---------------------------------------------------------------------------------------------------------------------------------------------------------------|------------------------------------------------------------------------------------------------------------------------------|
| 57 | G C | 25  | P | AC=1;AF=0.500;AN=2;BaseQRankSum=0.295;DP=45;ExcessHet=0.0000;FS=0.000;MLEAC=1;MLEAF=0.500;MQ=60.00;MQRankSum=0.00;QD=5.59;ReadPosRankSum=-4.342e+00;SOR=0.892 | :A 0 1:36,<br>D: 9:45:9<br>DP: 9:0 1:5<br>GQ 765_G BA<br>_A:25 .5 no<br>:PG<br>T:P 9,0,14<br>ID: 59:576<br>PL: 5<br>PS<br>GT |
| 58 | C T | 18  | P | AC=2;AF=1.00;AN=2;DP=10;ExcessHet=0.0000;FS=0.000;MLEAC=2;MLEAF=1.00;MQ=60.00;QD=23.00;SOR=0.693                                                              | :A 1/1:0,<br>D: 8:8:24 BA<br>DP: :198,2 .5 no<br>GQ 4,0<br>:PL<br>GT                                                         |
| 66 | C T | 60. | P | AC=2;AF=1.00;AN=2;DP=3;ExcessHet=0.0000;FS=0.000;MLEAC=1;MLEAF=0.500;MQ=60.00;QD=20.28;SOR=1.179                                                              | :A 1/1:0,<br>D: 3:3:9 BA<br>DP: 74,9,0 .5 yes<br>GQ<br>:PL<br>GT                                                             |
| 67 | C A | 40  | P | AC=2;AF=1.00;AN=2;BaseQRankSum=0.631;DP=1434;ExcessHet=0.0000;FS=0.000;MLEAC=2;MLEAF=1.00;MQ=60.00;MQRankSum=0.00;QD=30.14;ReadPosRankSum=0.501;SOR=0.278     | GT 1/1:1,<br>:A 1347:1 BA<br>D: 348:99 .5 yes<br>DP: :40639<br>GQ ,4004,<br>:PL 0<br>GT                                      |
| 67 | C A | 78. | P | AC=2;AF=1.00;AN=2;DP=2;ExcessHet=0.0000;FS=0.000;MLEAC=1;MLEAF=0.500;MQ=60.00;QD=30.67;SOR=0.693                                                              | :A 1 1:0,2<br>D: :2:6:1 <br>DP: 1:6792 BA<br>GQ _T_T .5 no<br>:PG A:90,6<br>T:P ,0:679<br>ID: 2<br>PL:<br>PS                 |
| 69 | T G | 10  | P | AC=1;AF=0.500;AN=2;BaseQRankSum=-3.190e-01;DP=8;ExcessHet=0.0000;FS=0.000;MLEAC=1;MLE                                                                         | GT 0/1:3,<br>:A 5:8:67 BA<br>D: :116,0, .5 no<br>DP: 67                                                                      |

|    |     |     |   |  |                           |     |         |    |     |
|----|-----|-----|---|--|---------------------------|-----|---------|----|-----|
|    |     |     |   |  | AF=0.500;MQ=60.00;MQR     | GQ  |         |    |     |
|    |     |     |   |  | ankSum=0.00;QD=13.58;Re   | :PL |         |    |     |
|    |     |     |   |  | adPosRankSum=-            |     |         |    |     |
|    |     |     |   |  | 1.292e+00;SOR=0.799       |     |         |    |     |
|    |     |     |   |  | AC=2;AF=1.00;AN=2;Base    |     |         |    |     |
|    |     |     |   |  | QRankSum=-                | GT  | 1/1:10  |    |     |
| 70 |     | 13  | P |  | 2.040e+00;DP=4081;Excess  | :A  | ,3798:  |    |     |
| 29 | C T | 24  | A |  | Het=0.0000;FS=0.000;MLE   | D:  | 3813:9  | BA |     |
|    |     | 91. | S |  | AC=2;MLEAF=1.00;MQ=6      | DP: | 9:1325  | .5 | yes |
|    |     | 1   | S |  | 0.00;MQRankSum=0.00;QD    | GQ  | 05,110  |    |     |
|    |     |     |   |  | =34.79;ReadPosRankSum=0   | :PL | 13,0    |    |     |
|    |     |     |   |  | .685;SOR=0.168            |     |         |    |     |
|    |     |     |   |  | AC=2;AF=1.00;AN=2;DP=     | GT  |         |    |     |
| 74 |     |     | P |  | 5;ExcessHet=0.0000;FS=0.0 | :A  | 1/1:0,  |    |     |
| 71 | C T | 85. | A |  | 00;MLEAC=2;MLEAF=1.0      | D:  | 4:4:12  | BA |     |
|    |     | 14  | S |  | 0;MQ=60.00;QD=21.29;SO    | DP: | :99,12, | .5 | no  |
|    |     |     | S |  | R=0.693                   | GQ  | 0       |    |     |
|    |     |     |   |  | AC=1;AF=0.500;AN=2;Bas    | GT  | 0/1:50  |    |     |
|    |     |     | P |  | eQRankSum=-7.310e-        | :A  | 0,187:  |    |     |
| 75 |     | 30  | A |  | 01;DP=700;ExcessHet=0.00  | D:  | 687:99  | BA |     |
| 28 | C T | 81. | S |  | 00;FS=1.247;MLEAC=1;M     | DP: | :3089,  | .5 | yes |
|    |     | 64  | S |  | LEAF=0.500;MQ=60.00;M     | GQ  | 0,1211  |    |     |
|    |     |     |   |  | QRankSum=0.00;QD=4.49;    | :PL | 9       |    |     |
|    |     |     |   |  | ReadPosRankSum=0.977;S    |     |         |    |     |
|    |     |     |   |  | OR=0.842                  |     |         |    |     |
|    |     |     |   |  | AC=2;AF=1.00;AN=2;Base    | GT  |         |    |     |
|    |     |     | P |  | QRankSum=0.933;DP=262;    | :A  | 1/1:2,  |    |     |
| 78 |     | 70  | A |  | ExcessHet=0.0000;FS=0.00  | D:  | 238:24  | BA |     |
| 51 | C T | 35. | S |  | 0;MLEAC=2;MLEAF=1.00;     | DP: | 0:99:7  | .5 | no  |
|    |     | 06  | S |  | MQ=60.00;MQRankSum=0.     | GQ  | 049,67  |    |     |
|    |     |     |   |  | 00;QD=29.31;ReadPosRank   | :PL | 1,0     |    |     |
|    |     |     |   |  | Sum=-2.610e-              |     |         |    |     |
|    |     |     |   |  | 01;SOR=1.019              |     |         |    |     |
|    |     |     |   |  | AC=1;AF=0.500;AN=2;Bas    | GT  |         |    |     |
|    |     |     | P |  | eQRankSum=-2.820e-        | :A  | 0 1:7,2 |    |     |
| 82 |     |     | A |  | 01;DP=9;ExcessHet=0.0000  | D:  | :9:63:  |    |     |
| 55 | G A | 55. | S |  | ;FS=0.000;MLEAC=1;MLE     | DP: | 0 1:82  | BA |     |
|    |     | 64  | S |  | AF=0.500;MQ=60.00;MQR     | GQ  | 55_G_   | .5 | no  |
|    |     |     | S |  | ankSum=0.00;QD=6.18;Rea   | :PG | A:63,0  |    |     |
|    |     |     |   |  | dPosRankSum=-2.820e-      | T:P | ,288:8  |    |     |
|    |     |     |   |  | 01;SOR=0.495              | ID: | 255     |    |     |
|    |     |     |   |  |                           | PL: |         |    |     |
|    |     |     |   |  |                           | PS  |         |    |     |
| 82 |     | 55. | P |  | AC=1;AF=0.500;AN=2;Bas    | GT  | 0 1:7,2 | BA |     |
| 62 | C T | 64  | A |  | eQRankSum=-2.820e-        | :A  | :9:63:  | .5 | no  |

|    |   |   |     |   |                                                                                                   |     |         |    |    |
|----|---|---|-----|---|---------------------------------------------------------------------------------------------------|-----|---------|----|----|
|    |   |   |     | S | 01;DP=9;ExcessHet=0.0000                                                                          | D:  | 0 1:82  |    |    |
|    |   |   |     | S | ;FS=0.000;MLEAC=1;MLEAF=0.500;MQ=60.00;MQRankSum=0.00;QD=6.18;ReadPosRankSum=-1.383e+00;SOR=0.495 | DP: | 55_G_   |    |    |
|    |   |   |     |   |                                                                                                   | GQ  | A:63,0  |    |    |
|    |   |   |     |   |                                                                                                   | :PG | ,288:8  |    |    |
|    |   |   |     |   |                                                                                                   | T:P | 255     |    |    |
|    |   |   |     |   |                                                                                                   | ID: |         |    |    |
|    |   |   |     |   |                                                                                                   | PL: |         |    |    |
|    |   |   |     |   |                                                                                                   | PS  |         |    |    |
|    |   |   |     |   |                                                                                                   | GT  |         |    |    |
|    |   |   |     |   |                                                                                                   | :A  |         |    |    |
|    |   |   |     |   |                                                                                                   | D:  | 1 1:0,2 |    |    |
| 82 | T | A | 78. | P | AC=2;AF=1.00;AN=2;DP=                                                                             | DP: | :2:6:1  |    |    |
| 89 |   |   | 32  | A | 2;ExcessHet=0.0000;FS=0.00;MLEAC=1;MLEAF=0.500;MQ=60.00;QD=28.20;SOR=0.693                        | GQ  | 1:8289  | BA | no |
|    |   |   |     | S |                                                                                                   | :PG | _T_A:   | .5 |    |
|    |   |   |     | S |                                                                                                   | T:P | 90,6,0: |    |    |
|    |   |   |     |   |                                                                                                   | ID: | 8289    |    |    |
|    |   |   |     |   |                                                                                                   | PL: |         |    |    |
|    |   |   |     |   |                                                                                                   | PS  |         |    |    |
|    |   |   |     |   |                                                                                                   | GT  |         |    |    |
|    |   |   |     |   |                                                                                                   | :A  |         |    |    |
|    |   |   |     |   |                                                                                                   | D:  | 1 1:0,2 |    |    |
| 82 | C | T | 78. | P | AC=2;AF=1.00;AN=2;DP=                                                                             | DP: | :2:6:1  |    |    |
| 92 |   |   | 32  | A | 2;ExcessHet=0.0000;FS=0.00;MLEAC=1;MLEAF=0.500;MQ=60.00;QD=25.00;SOR=0.693                        | GQ  | 1:8289  | BA | no |
|    |   |   |     | S |                                                                                                   | :PG | _T_A:   | .5 |    |
|    |   |   |     | S |                                                                                                   | T:P | 90,6,0: |    |    |
|    |   |   |     |   |                                                                                                   | ID: | 8289    |    |    |
|    |   |   |     |   |                                                                                                   | PL: |         |    |    |
|    |   |   |     |   |                                                                                                   | PS  |         |    |    |
|    |   |   |     |   |                                                                                                   | GT  |         |    |    |
|    |   |   |     |   |                                                                                                   | :A  |         |    |    |
|    |   |   |     |   |                                                                                                   | D:  | 1 1:0,2 |    |    |
| 82 | A | C | 78. | P | AC=2;AF=1.00;AN=2;DP=                                                                             | DP: | :2:6:1  |    |    |
| 95 |   |   | 32  | A | 2;ExcessHet=0.0000;FS=0.00;MLEAC=1;MLEAF=0.500;MQ=60.00;QD=29.56;SOR=0.693                        | GQ  | 1:8289  | BA | no |
|    |   |   |     | S |                                                                                                   | :PG | _T_A:   | .5 |    |
|    |   |   |     | S |                                                                                                   | T:P | 90,6,0: |    |    |
|    |   |   |     |   |                                                                                                   | ID: | 8289    |    |    |
|    |   |   |     |   |                                                                                                   | PL: |         |    |    |
|    |   |   |     |   |                                                                                                   | PS  |         |    |    |
|    |   |   |     |   |                                                                                                   | GT  |         |    |    |
|    |   |   |     |   |                                                                                                   | :A  |         |    |    |
|    |   |   |     |   |                                                                                                   | D:  | 1 1:0,4 |    |    |
| 84 | C | A | 16  | P | AC=2;AF=1.00;AN=2;DP=                                                                             | DP: | :4:12:  |    |    |
| 63 |   |   | 6.1 | A | 4;ExcessHet=0.0000;FS=0.00;MLEAC=2;MLEAF=1.00;MQ=60.00;QD=33.63;SOR=0.693                         | D:  | 1 1:84  | BA | no |
|    |   |   | 4   | S |                                                                                                   | DP: | 52_A    | .5 |    |
|    |   |   |     | S |                                                                                                   | GQ  | CGTA    |    |    |
|    |   |   |     |   |                                                                                                   | :PG | GTG_    |    |    |
|    |   |   |     |   |                                                                                                   | T:P | A:180,  |    |    |
|    |   |   |     |   |                                                                                                   | ID: |         |    |    |



|    |   |   |     |   |                           |             |    |    |
|----|---|---|-----|---|---------------------------|-------------|----|----|
| 84 | T | G | 16  | P | AC=2;AF=1.00;AN=2;DP=     | PL: 12,0:8  |    |    |
| 64 |   |   | 6.1 | A | 4;ExcessHet=0.0000;FS=0.0 | PS 452      |    |    |
|    |   |   | 4   | S | 00;MLEAC=2;MLEAF=1.0      | GT 1 1:0,4  |    |    |
|    |   |   |     | S | 0;MQ=60.00;QD=30.55;SO    | :A :4:12:   |    |    |
|    |   |   |     |   | R=0.693                   | D: 1 1:84   |    |    |
|    |   |   |     |   |                           | DP: 52_A    | BA | no |
|    |   |   |     |   |                           | GQ CGTA     | .5 |    |
|    |   |   |     |   |                           | :PG GTG_    |    |    |
|    |   |   |     |   |                           | T:P A:180,  |    |    |
|    |   |   |     |   |                           | ID: 12,0:8  |    |    |
|    |   |   |     |   |                           | PL: 452     |    |    |
|    |   |   |     |   |                           | PS          |    |    |
|    |   |   |     |   |                           | GT          |    |    |
|    |   |   |     |   |                           | :A 0 1:27,  |    |    |
| 85 | T | G | 16  | P | AC=1;AF=0.500;AN=2;Bas    | D: 6:33:9   |    |    |
| 92 |   |   | 3.6 | A | eQRankSum=3.03;DP=33;E    | DP: 9:0 1:8 |    |    |
|    |   |   | 4   | S | xcessHet=0.0000;FS=4.263; | GQ 581_G    | BA | no |
|    |   |   |     | S | MLEAC=1;MLEAF=0.500;      | :PG TT_G:   | .5 |    |
|    |   |   |     |   | MQ=60.00;MQRankSum=0.     | T:P 171,0,  |    |    |
|    |   |   |     |   | 00;QD=4.96;ReadPosRankS   | ID: 1116:8  |    |    |
|    |   |   |     |   | um=-1.059e+00;SOR=1.187   | PL: 581     |    |    |
|    |   |   |     |   |                           | PS          |    |    |
|    |   |   |     |   |                           | GT          |    |    |
|    |   |   |     |   |                           | :A 0 1:27,  |    |    |
| 85 | T | A | 16  | P | AC=1;AF=0.500;AN=2;Bas    | D: 6:33:9   |    |    |
| 93 |   |   | 3.6 | A | eQRankSum=2.78;DP=33;E    | DP: 9:0 1:8 |    |    |
|    |   |   | 4   | S | xcessHet=0.0000;FS=4.263; | GQ 581_G    | BA | no |
|    |   |   |     | S | MLEAC=1;MLEAF=0.500;      | :PG TT_G:   | .5 |    |
|    |   |   |     |   | MQ=60.00;MQRankSum=0.     | T:P 171,0,  |    |    |
|    |   |   |     |   | 00;QD=4.96;ReadPosRankS   | ID: 1116:8  |    |    |
|    |   |   |     |   | um=-1.059e+00;SOR=1.187   | PL: 581     |    |    |
|    |   |   |     |   |                           | PS          |    |    |
|    |   |   |     |   |                           | GT          |    |    |
|    |   |   |     |   |                           | :A 0 1:29,  |    |    |
| 85 | T | A | 15  | P | AC=1;AF=0.500;AN=2;Bas    | D: 6:35:9   |    |    |
| 98 |   |   | 7.6 | A | eQRankSum=2.92;DP=35;E    | DP: 9:0 1:8 |    |    |
|    |   |   | 4   | S | xcessHet=0.0000;FS=4.212; | GQ 581_G    | BA | no |
|    |   |   |     | S | MLEAC=1;MLEAF=0.500;      | :PG TT_G:   | .5 |    |
|    |   |   |     |   | MQ=60.00;MQRankSum=0.     | T:P 165,0,  |    |    |
|    |   |   |     |   | 00;QD=4.50;ReadPosRankS   | ID: 1200:8  |    |    |
|    |   |   |     |   | um=-4.630e-01;SOR=1.194   | PL: 581     |    |    |
|    |   |   |     |   |                           | PS          |    |    |
|    |   |   |     |   |                           | GT 0 1:29,  |    |    |
| 85 | T | A | 15  | P | AC=1;AF=0.500;AN=2;Bas    | :A 6:35:9   | BA | no |
| 99 |   |   | 7.6 | A | eQRankSum=2.92;DP=35;E    | D: 9:0 1:8  | .5 |    |
|    |   |   | 4   | S | xcessHet=0.0000;FS=4.212; | DP: 581_G   |    |    |
|    |   |   |     | S | MLEAC=1;MLEAF=0.500;      |             |    |    |

|    |   |   |     |   |                                                                                                                                                                    |     |         |    |    |
|----|---|---|-----|---|--------------------------------------------------------------------------------------------------------------------------------------------------------------------|-----|---------|----|----|
|    |   |   |     |   | MQ=60.00;MQRankSum=0.00;QD=4.50;ReadPosRankSum=-8.160e-01;SOR=1.194                                                                                                | GQ  | TT_G:   |    |    |
|    |   |   |     |   |                                                                                                                                                                    | :PG | 165,0,  |    |    |
|    |   |   |     |   |                                                                                                                                                                    | T:P | 1200:8  |    |    |
|    |   |   |     |   |                                                                                                                                                                    | ID: | 581     |    |    |
|    |   |   |     |   |                                                                                                                                                                    | PL: |         |    |    |
|    |   |   |     |   |                                                                                                                                                                    | PS  |         |    |    |
|    |   |   |     |   |                                                                                                                                                                    | GT  |         |    |    |
|    |   |   |     |   | AC=1;AF=0.500;AN=2;BaseQRankSum=3.03;DP=36;ExcessHet=0.0000;FS=4.077;MLEAC=1;MLEAF=0.500;MQ=60.00;MQRankSum=0.00;QD=4.30;ReadPosRankSum=-1.081e+00;SOR=1.219       | :A  | 0 1:30, |    |    |
|    |   |   |     |   |                                                                                                                                                                    | D:  | 6:36:9  |    |    |
|    |   |   |     |   |                                                                                                                                                                    | DP: | 9:0 1:8 |    |    |
| 86 | T | A | 15  | P |                                                                                                                                                                    | GQ  | 581_G   | BA |    |
| 04 |   |   | 4.6 | A |                                                                                                                                                                    | :PG | TT_G:   | .5 | no |
|    |   |   |     | S |                                                                                                                                                                    | T:P | 162,0,  |    |    |
|    |   |   |     | S |                                                                                                                                                                    | ID: | 1242:8  |    |    |
|    |   |   |     |   |                                                                                                                                                                    | PL: | 581     |    |    |
|    |   |   |     |   |                                                                                                                                                                    | PS  |         |    |    |
|    |   |   |     |   |                                                                                                                                                                    | GT  |         |    |    |
|    |   |   |     |   | AC=1;AF=0.500;AN=2;BaseQRankSum=3.05;DP=36;ExcessHet=0.0000;FS=4.077;MLEAC=1;MLEAF=0.500;MQ=60.00;MQRankSum=0.00;QD=4.30;ReadPosRankSum=-9.200e-01;SOR=1.219       | :A  | 0 1:30, |    |    |
|    |   |   |     |   |                                                                                                                                                                    | D:  | 6:36:9  |    |    |
|    |   |   |     |   |                                                                                                                                                                    | DP: | 9:0 1:8 |    |    |
| 86 | C | A | 15  | P |                                                                                                                                                                    | GQ  | 581_G   | BA |    |
| 05 |   |   | 4.6 | A |                                                                                                                                                                    | :PG | TT_G:   | .5 | no |
|    |   |   |     | S |                                                                                                                                                                    | T:P | 162,0,  |    |    |
|    |   |   |     | S |                                                                                                                                                                    | ID: | 1242:8  |    |    |
|    |   |   |     |   |                                                                                                                                                                    | PL: | 581     |    |    |
|    |   |   |     |   |                                                                                                                                                                    | PS  |         |    |    |
|    |   |   |     |   |                                                                                                                                                                    | GT  |         |    |    |
|    |   |   |     |   | AC=1;AF=0.500;AN=2;BaseQRankSum=-6.740e-01;DP=2;ExcessHet=0.0000;FS=0.000;MLEAC=1;MLEAF=0.500;MQ=60.00;MQRankSum=0.00;QD=15.82;ReadPosRankSum=-6.740e-01;SOR=1.447 | :A  | 0 1:1,1 |    |    |
|    |   |   |     |   |                                                                                                                                                                    | D:  | :2:39:  |    |    |
|    |   |   |     |   |                                                                                                                                                                    | DP: | 0 1:86  |    |    |
| 86 | T | A | 31. | P |                                                                                                                                                                    | GQ  | 05_C    | BA |    |
| 09 |   |   | 64  | A |                                                                                                                                                                    | :PG | CTT_    | .5 | no |
|    |   |   |     | S |                                                                                                                                                                    | T:P | C:39,0  |    |    |
|    |   |   |     | S |                                                                                                                                                                    | ID: | ,39:86  |    |    |
|    |   |   |     |   |                                                                                                                                                                    | PL: | 05      |    |    |
|    |   |   |     |   |                                                                                                                                                                    | PS  |         |    |    |
|    |   |   |     |   |                                                                                                                                                                    | GT  |         |    |    |
|    |   |   |     |   | AC=1;AF=0.500;AN=2;BaseQRankSum=-6.740e-01;DP=2;ExcessHet=0.0000;FS=0.000;MLEAC=1;MLEAF=0.500;MQ=60.00;MQRankSum=0.00;QD=15.82;ReadPosRankSum=-6.740e-01;SOR=1.447 | :A  | 0 1:1,1 |    |    |
|    |   |   |     |   |                                                                                                                                                                    | D:  | :2:39:  |    |    |
|    |   |   |     |   |                                                                                                                                                                    | DP: | 0 1:86  |    |    |
| 86 | T | G | 31. | P |                                                                                                                                                                    | GQ  | 05_C    | BA |    |
| 14 |   |   | 64  | A |                                                                                                                                                                    | :PG | CTT_    | .5 | no |
|    |   |   |     | S |                                                                                                                                                                    | T:P | C:39,0  |    |    |
|    |   |   |     | S |                                                                                                                                                                    | ID: | ,39:86  |    |    |
|    |   |   |     |   |                                                                                                                                                                    | PL: | 05      |    |    |
|    |   |   |     |   |                                                                                                                                                                    | PS  |         |    |    |

|          |   |   |                      |                  |                                                                                                                                                                     |                                                               |                                                                       |          |     |
|----------|---|---|----------------------|------------------|---------------------------------------------------------------------------------------------------------------------------------------------------------------------|---------------------------------------------------------------|-----------------------------------------------------------------------|----------|-----|
| 86<br>16 | C | A | 31.<br>64            | P<br>A<br>S<br>S | AC=1;AF=0.500;AN=2;BaseQRankSum=-6.740e-01;DP=2;ExcessHet=0.0000;FS=0.000;MLEAC=1;MLEAF=0.500;MQ=60.00;MQRankSum=0.00;QD=15.82;ReadPosRankSum=-6.740e-01;SOR=1.447  | GT<br>:A<br>D:<br>DP:<br>GQ<br>:PG<br>T:P<br>ID:<br>PL:<br>PS | 0 1:1,1<br>:2:39:<br>0 1:86<br>05_C<br>CTT_<br>C:39,0<br>,39:86<br>05 | BA<br>.5 | no  |
| 86<br>26 | C | T | 20<br>27<br>00.<br>1 | P<br>A<br>S<br>S | AC=2;AF=1.00;AN=2;BaseQRankSum=-2.572e+00;DP=5593;ExcessHet=0.0000;FS=0.000;MLEAC=2;MLEAF=1.00;MQ=60.00;MQRankSum=0.00;QD=28.17;ReadPosRankSum=-2.250e-01;SOR=0.816 | GT<br>:A<br>D:<br>DP:<br>GQ<br>:PL                            | 1/1:21<br>,5372:<br>5393:9<br>9:2027<br>14,152<br>62,0                | BA<br>.5 | yes |
| 86<br>98 | T | C | 35.<br>48            | P<br>A<br>S<br>S | AC=2;AF=1.00;AN=2;DP=1;ExcessHet=0.0000;FS=0.000;MLEAC=1;MLEAF=0.500;MQ=60.00;QD=32.62;SOR=1.609                                                                    | GT<br>:A<br>D:<br>DP:<br>GQ<br>:PG<br>T:P<br>ID:<br>PL:<br>PS | 1 1:0,1<br>:1:3:1 <br>1:8698<br>_T_C:<br>45,3,0:<br>8698              | BA<br>.5 | no  |
| 87<br>00 | T | A | 35.<br>48            | P<br>A<br>S<br>S | AC=2;AF=1.00;AN=2;DP=1;ExcessHet=0.0000;FS=0.000;MLEAC=1;MLEAF=0.500;MQ=60.00;QD=29.33;SOR=1.609                                                                    | GT<br>:A<br>D:<br>DP:<br>GQ<br>:PG<br>T:P<br>ID:<br>PL:<br>PS | 1 1:0,1<br>:1:3:1 <br>1:8698<br>_T_C:<br>45,3,0:<br>8698              | BA<br>.5 | no  |
| 87<br>06 | G | C | 35.<br>48            | P<br>A<br>S<br>S | AC=2;AF=1.00;AN=2;DP=1;ExcessHet=0.0000;FS=0.000;MLEAC=1;MLEAF=0.500;MQ=60.00;QD=35.36;SOR=1.609                                                                    | GT<br>:A<br>D:<br>DP:<br>GQ<br>:PG<br>T:P<br>ID:              | 1 1:0,1<br>:1:3:1 <br>1:8698<br>_T_C:<br>45,3,0:<br>8698              | BA<br>.5 | no  |

|          |     |                      |                  |                                                                                                    |                                                                                                                              |          |     |
|----------|-----|----------------------|------------------|----------------------------------------------------------------------------------------------------|------------------------------------------------------------------------------------------------------------------------------|----------|-----|
| 91<br>30 | G T | 26<br>29<br>1.0<br>6 | P<br>A<br>S<br>S | AC=2;AF=1.00;AN=2;DP=1060;ExcessHet=0.0000;FS=0.000;MLEAC=2;MLEAF=1.00;MQ=60.00;QD=28.12;SOR=0.907 | PL:<br>PS<br>GT<br>:A 1/1:0,<br>D: 935:93<br>DP: 5:99:2<br>GQ 6305,2<br>:PL 804,0                                            | BA<br>.5 | no  |
| 91<br>60 | T A | 13<br>74.<br>06      | P<br>A<br>S<br>S | AC=2;AF=1.00;AN=2;DP=52;ExcessHet=0.0000;FS=0.000;MLEAC=2;MLEAF=1.00;MQ=60.00;QD=26.42;SOR=0.941   | GT<br>:A 1/1:0,<br>D: 52:52:<br>DP: 99:138<br>GQ 8,156,<br>:PL 0                                                             | BA<br>.5 | yes |
| 92<br>35 | A G | 37.<br>32            | P<br>A<br>S<br>S | AC=2;AF=1.00;AN=2;DP=2;ExcessHet=0.0000;FS=0.000;MLEAC=1;MLEAF=0.500;MQ=60.00;QD=18.66;SOR=0.693   | GT<br>:A 1/1:0,<br>D: 2:2:6:<br>DP: 49,6,0<br>GQ<br>:PL                                                                      | BA<br>.5 | no  |
| 92<br>60 | T G | 78.<br>32            | P<br>A<br>S<br>S | AC=2;AF=1.00;AN=2;DP=2;ExcessHet=0.0000;FS=0.000;MLEAC=1;MLEAF=0.500;MQ=60.00;QD=34.30;SOR=0.693   | GT<br>:A<br>D: 1 1:0,2<br>DP: :2:6:1 <br>GQ 1:9260<br>:PG _T_G:<br>T:P 90,6,0:<br>ID: 9260<br>PL:<br>PS<br>GT                | BA<br>.5 | no  |
| 93<br>44 | C T | 18<br>06<br>00.<br>1 | P<br>A<br>S<br>S | AC=2;AF=1.00;AN=2;DP=4770;ExcessHet=0.0000;FS=0.000;MLEAC=2;MLEAF=1.00;MQ=60.00;QD=26.80;SOR=1.118 | :A 1 1:0,4<br>D: 649:46<br>DP: 49:99:<br>GQ 1 1:93<br>:PG 44_C_<br>T:180<br>T:P 614,13<br>ID: 977,0:<br>PL: 9344<br>PS<br>GT | BA<br>.5 | yes |
| 94<br>06 | A G | 78.<br>32            | P<br>A<br>S<br>S | AC=2;AF=1.00;AN=2;DP=2;ExcessHet=0.0000;FS=0.000;MLEAC=1;MLEAF=0.500;MQ=60.00;QD=35.92;SOR=0.693   | :A 1 1:0,2<br>D: :2:6:1 <br>DP: 1:9402<br>GQ _CTA<br>:PG _C:90,                                                              | BA<br>.5 | no  |

|    |   |   |     |   |                           |     |         |    |     |
|----|---|---|-----|---|---------------------------|-----|---------|----|-----|
| 94 | G | A | 78. | P | AC=2;AF=1.00;AN=2;DP=     | T:P | 6,0:94  |    |     |
| 14 |   |   | 32  | A | 2;ExcessHet=0.0000;FS=0.0 | ID: | 02      |    |     |
|    |   |   |     | S | 00;MLEAC=1;MLEAF=0.5      | PL: |         |    |     |
|    |   |   |     | S | 00;MQ=60.00;QD=29.94;S    | PS  |         |    |     |
|    |   |   |     |   | OR=0.693                  | GT  |         |    |     |
|    |   |   |     |   |                           | :A  |         |    |     |
|    |   |   |     |   |                           | D:  | 1 1:0,2 |    |     |
|    |   |   |     |   |                           | DP: | :2:6:1  |    |     |
|    |   |   |     |   |                           | GQ  | 1:9402  | BA |     |
|    |   |   |     |   |                           | :PG | _CTA    | .5 | no  |
|    |   |   |     |   |                           | T:P | _C:90,  |    |     |
|    |   |   |     |   |                           | ID: | 6,0:94  |    |     |
|    |   |   |     |   |                           | PL: | 02      |    |     |
|    |   |   |     |   |                           | PS  |         |    |     |
|    |   |   |     |   |                           | GT  |         |    |     |
|    |   |   |     |   |                           | :A  |         |    |     |
|    |   |   |     |   | AC=1;AF=0.500;AN=2;Bas    | D:  | 0 1:29, |    |     |
|    |   |   |     |   | eQRankSum=-4.670e-        | DP: | 4:33:8  |    |     |
|    |   |   |     |   | 01;DP=35;ExcessHet=0.000  | GQ  | 1:0 1:9 | BA |     |
| 94 | G | T | 73. | A | 0;FS=0.000;MLEAC=1;ML     | :PG | 417_G   | .5 | no  |
| 17 |   |   | 64  | S | EAF=0.500;MQ=60.00;MQ     | T:P | _T:81,  |    |     |
|    |   |   |     | S | RankSum=0.00;QD=2.23;R    | ID: | 0,1206  |    |     |
|    |   |   |     |   | eadPosRankSum=-           | PL: | :9417   |    |     |
|    |   |   |     |   | 1.413e+00;SOR=0.631       | PS  |         |    |     |
|    |   |   |     |   |                           | GT  |         |    |     |
|    |   |   |     |   |                           | :A  |         |    |     |
|    |   |   |     |   | AC=1;AF=0.500;AN=2;Bas    | D:  | 0 1:29, |    |     |
|    |   |   |     |   | eQRankSum=-               | DP: | 4:33:8  |    |     |
|    |   |   |     |   | 1.880e+00;DP=33;ExcessHe  | GQ  | 1:0 1:9 | BA |     |
| 94 | A | T | 73. | A | t=0.0000;FS=0.000;MLEAC   | :PG | 417_G   | .5 | no  |
| 19 |   |   | 64  | S | =1;MLEAF=0.500;MQ=60.     | T:P | _T:81,  |    |     |
|    |   |   |     | S | 00;MQRankSum=0.00;QD=     | ID: | 0,1206  |    |     |
|    |   |   |     |   | 2.23;ReadPosRankSum=-     | PL: | :9417   |    |     |
|    |   |   |     |   | 1.411e+00;SOR=0.631       | PS  |         |    |     |
|    |   |   |     |   |                           | GT  |         |    |     |
|    |   |   |     |   |                           | :A  |         |    |     |
|    |   |   |     |   | AC=1;AF=0.500;AN=2;Bas    | D:  | 0 1:29, |    |     |
|    |   |   |     |   | eQRankSum=-4.840e-        | DP: | 4:33:8  |    |     |
|    |   |   |     |   | 01;DP=33;ExcessHet=0.000  | GQ  | 1:0 1:9 | BA |     |
| 94 | T | G | 73. | A | 0;FS=0.000;MLEAC=1;ML     | :PG | 417_G   | .5 | no  |
| 20 |   |   | 64  | S | EAF=0.500;MQ=60.00;MQ     | T:P | _T:81,  |    |     |
|    |   |   |     | S | RankSum=0.00;QD=2.23;R    | ID: | 0,1206  |    |     |
|    |   |   |     |   | eadPosRankSum=-           | PL: | :9417   |    |     |
|    |   |   |     |   | 1.747e+00;SOR=0.631       | PS  |         |    |     |
|    |   |   |     |   |                           | GT  |         |    |     |
|    |   |   |     |   |                           | :A  |         |    |     |
|    |   |   |     |   | AC=2;AF=1.00;AN=2;Base    | GT  | 1 1:14, | BA |     |
| 94 | A | G | 17  | P | QRankSum=-8.300e-         | :A  | 4451:4  | .5 | yes |
| 24 |   |   | 41  | A |                           |     |         |    |     |

|    |   |     |   |  |                           |       |         |    |     |
|----|---|-----|---|--|---------------------------|-------|---------|----|-----|
|    |   | 27. | S |  | 01;DP=4659;ExcessHet=0.0  | D:    | 465:99  |    |     |
|    |   | 1   | S |  | 000;FS=0.000;MLEAC=2;     | DP:   | :1 1:93 |    |     |
|    |   |     |   |  | MLEAF=1.00;MQ=60.00;M     | GQ    | 44_C_   |    |     |
|    |   |     |   |  | QRankSum=0.00;QD=26.00    | :PG   | T:174   |    |     |
|    |   |     |   |  | ;ReadPosRankSum=2.27;SO   | T:P   | 141,12  |    |     |
|    |   |     |   |  | R=0.275                   | ID:   | 818,0:  |    |     |
|    |   |     |   |  |                           | PL:   | 9344    |    |     |
|    |   |     |   |  |                           | PS    |         |    |     |
|    |   |     |   |  | AC=2;AF=1.00;AN=2;Base    |       |         |    |     |
|    |   |     |   |  | QRankSum=-5.870e-         | GT    | 1/1:1,  |    |     |
|    |   | 18  | P |  | 01;DP=5088;ExcessHet=0.0  | :A    | 4898:4  |    |     |
| 95 | C | 33  | A |  | 000;FS=0.000;MLEAC=2;     | D:    | 906:99  | BA |     |
| 34 | T | 98. | S |  | MLEAF=1.00;MQ=60.00;M     | DP:   | :18341  | .5 | yes |
|    |   | 1   | S |  | QRankSum=0.524;QD=30.0    | GQ    | 2,1468  |    |     |
|    |   |     |   |  | 2;ReadPosRankSum=-        | :PL   | 8,0     |    |     |
|    |   |     |   |  | 1.486e+00;SOR=0.262       |       |         |    |     |
|    |   |     |   |  |                           | GT    |         |    |     |
|    |   |     |   |  |                           | :A    |         |    |     |
|    |   |     |   |  | AC=2;AF=1.00;AN=2;DP=     | D:    | 1 1:0,1 |    |     |
| 95 | T | 35. | A |  | 1;ExcessHet=0.0000;FS=0.0 | DP:   | :1:3:1  |    |     |
| 35 | A | 48  | S |  | 00;MLEAC=1;MLEAF=0.5      | GQ    | 1:9533  | BA |     |
|    |   |     | S |  | 00;MQ=60.00;QD=28.86;S    | :PG   | _A_A    | .5 | no  |
|    |   |     |   |  | OR=1.609                  | TTG:4 |         |    |     |
|    |   |     |   |  |                           | T:P   | 5,3,0:9 |    |     |
|    |   |     |   |  |                           | ID:   | 533     |    |     |
|    |   |     |   |  |                           | PL:   |         |    |     |
|    |   |     |   |  |                           | PS    |         |    |     |
|    |   |     |   |  |                           | GT    |         |    |     |
|    |   |     |   |  |                           | :A    |         |    |     |
|    |   |     |   |  | AC=2;AF=1.00;AN=2;DP=     | D:    | 1 1:0,1 |    |     |
| 95 | G | 35. | A |  | 1;ExcessHet=0.0000;FS=0.0 | DP:   | :1:3:1  |    |     |
| 43 | T | 48  | S |  | 00;MLEAC=1;MLEAF=0.5      | GQ    | 1:9533  | BA |     |
|    |   |     | S |  | 00;MQ=60.00;QD=31.11;S    | :PG   | _A_A    | .5 | no  |
|    |   |     |   |  | OR=1.609                  | TTG:4 |         |    |     |
|    |   |     |   |  |                           | T:P   | 5,3,0:9 |    |     |
|    |   |     |   |  |                           | ID:   | 533     |    |     |
|    |   |     |   |  |                           | PL:   |         |    |     |
|    |   |     |   |  |                           | PS    |         |    |     |
|    |   |     |   |  |                           | GT    |         |    |     |
|    |   |     |   |  |                           | :A    |         |    |     |
|    |   |     |   |  | AC=2;AF=1.00;AN=2;DP=     | D:    | 1 1:0,1 |    |     |
| 95 | T | 35. | A |  | 1;ExcessHet=0.0000;FS=0.0 | DP:   | :1:3:1  |    |     |
| 45 | A | 48  | S |  | 00;MLEAC=1;MLEAF=0.5      | GQ    | 1:9533  | BA |     |
|    |   |     | S |  | 00;MQ=60.00;QD=34.66;S    | :PG   | _A_A    | .5 | no  |
|    |   |     |   |  | OR=1.609                  | TTG:4 |         |    |     |
|    |   |     |   |  |                           | T:P   | 5,3,0:9 |    |     |
|    |   |     |   |  |                           | ID:   | 533     |    |     |
|    |   |     |   |  |                           | PL:   |         |    |     |
|    |   |     |   |  |                           | PS    |         |    |     |

|    |     |     |   |                           |             |    |     |  |
|----|-----|-----|---|---------------------------|-------------|----|-----|--|
| 95 | T A | 78. | P | AC=2;AF=1.00;AN=2;DP=     | GT          |    |     |  |
| 89 |     | 32  | A | 2;ExcessHet=0.0000;FS=0.0 | :A          |    |     |  |
|    |     |     | S | 00;MLEAC=1;MLEAF=0.5      | D: 1 1:0,2  |    |     |  |
|    |     |     | S | 00;MQ=60.00;QD=29.40;S    | DP: :2:6:1  |    |     |  |
|    |     |     |   | OR=0.693                  | GQ 1:9589   | BA | no  |  |
|    |     |     |   |                           | :PG _T_A:   | .5 |     |  |
|    |     |     |   |                           | T:P 90,6,0: |    |     |  |
|    |     |     |   |                           | ID: 9589    |    |     |  |
|    |     |     |   |                           | PL:         |    |     |  |
|    |     |     |   |                           | PS          |    |     |  |
|    |     |     |   |                           | GT          |    |     |  |
|    |     |     |   |                           | :A          |    |     |  |
|    |     |     |   |                           | D: 1 1:0,2  |    |     |  |
|    |     |     |   |                           | DP: :2:6:1  |    |     |  |
| 95 | C G | 78. | P | AC=2;AF=1.00;AN=2;DP=     | GQ 1:9589   | BA | no  |  |
| 92 |     | 32  | A | 2;ExcessHet=0.0000;FS=0.0 | :PG _T_A:   | .5 |     |  |
|    |     |     | S | 00;MLEAC=1;MLEAF=0.5      | T:P 90,6,0: |    |     |  |
|    |     |     | S | 00;MQ=60.00;QD=36.76;S    | ID: 9589    |    |     |  |
|    |     |     |   | OR=0.693                  | PL:         |    |     |  |
|    |     |     |   |                           | PS          |    |     |  |
|    |     |     |   |                           | GT          |    |     |  |
|    |     |     |   |                           | :A          |    |     |  |
|    |     |     |   |                           | D: 1 1:0,2  |    |     |  |
|    |     |     |   |                           | DP: :2:6:1  |    |     |  |
| 95 | G A | 78. | P | AC=2;AF=1.00;AN=2;DP=     | GQ 1:9589   | BA | no  |  |
| 95 |     | 32  | A | 2;ExcessHet=0.0000;FS=0.0 | :PG _T_A:   | .5 |     |  |
|    |     |     | S | 00;MLEAC=1;MLEAF=0.5      | T:P 90,6,0: |    |     |  |
|    |     |     | S | 00;MQ=60.00;QD=30.54;S    | ID: 9589    |    |     |  |
|    |     |     |   | OR=0.693                  | PL:         |    |     |  |
|    |     |     |   |                           | PS          |    |     |  |
|    |     |     |   |                           | GT          |    |     |  |
|    |     |     |   |                           | :A          |    |     |  |
|    |     |     |   |                           | D: 1 1:0,2  |    |     |  |
|    |     |     |   |                           | DP: :2:6:1  |    |     |  |
| 95 | C T | 78. | P | AC=2;AF=1.00;AN=2;DP=     | GQ 1:9589   | BA | yes |  |
| 98 |     | 32  | A | 2;ExcessHet=0.0000;FS=0.0 | :PG _T_A:   | .5 |     |  |
|    |     |     | S | 00;MLEAC=1;MLEAF=0.5      | T:P 90,6,0: |    |     |  |
|    |     |     | S | 00;MQ=60.00;QD=21.53;S    | ID: 9589    |    |     |  |
|    |     |     |   | OR=0.693                  | PL:         |    |     |  |
|    |     |     |   |                           | PS          |    |     |  |
|    |     |     |   |                           | GT 1 1:0,2  |    |     |  |
|    |     |     |   |                           | :A :2:6:1   |    |     |  |
|    |     |     |   |                           | D: 1:9589   | BA | no  |  |
| 95 | T A | 78. | P | AC=2;AF=1.00;AN=2;DP=     | DP: _T_A:   | .5 |     |  |
| 99 |     | 32  | A | 2;ExcessHet=0.0000;FS=0.0 | GQ 90,6,0:  |    |     |  |
|    |     |     | S | 00;MLEAC=1;MLEAF=0.5      | :PG 9589    |    |     |  |
|    |     |     | S | 00;MQ=60.00;QD=34.87;S    |             |    |     |  |
|    |     |     |   | OR=0.693                  |             |    |     |  |

|    |   |   |     |   |                           |     |         |    |     |
|----|---|---|-----|---|---------------------------|-----|---------|----|-----|
| 96 | T | A | 78. | P | AC=2;AF=1.00;AN=2;DP=     | T:P |         |    |     |
| 07 |   |   | 32  | A | 2;ExcessHet=0.0000;FS=0.0 | ID: |         |    |     |
|    |   |   |     | S | 00;MLEAC=1;MLEAF=0.5      | PL: |         |    |     |
|    |   |   |     | S | 00;MQ=60.00;QD=34.17;S    | PS  |         |    |     |
|    |   |   |     |   | OR=0.693                  | GT  |         |    |     |
|    |   |   |     |   |                           | :A  |         |    |     |
|    |   |   |     |   |                           | D:  | 1 1:0,2 |    |     |
|    |   |   |     |   |                           | DP: | :2:6:1  |    |     |
|    |   |   |     |   |                           | GQ  | 1:9589  | BA |     |
|    |   |   |     |   |                           | :PG | _T_A:   | .5 | no  |
|    |   |   |     |   |                           | T:P | 90,6,0: |    |     |
|    |   |   |     |   |                           | ID: | 9589    |    |     |
|    |   |   |     |   |                           | PL: |         |    |     |
|    |   |   |     |   |                           | PS  |         |    |     |
|    |   |   |     |   | AC=2;AF=1.00;AN=2;Base    |     |         |    |     |
|    |   |   |     |   | QRankSum=-                | GT  | 1/1:6,  |    |     |
| 10 |   |   | 19  | P | 1.323e+00;DP=5359;Excess  | :A  | 4814:4  |    |     |
| 02 | C | T | 36  | A | Het=0.0000;FS=0.000;MLE   | D:  | 871:99  | BA |     |
| 9  |   |   | 34. | S | AC=2;MLEAF=1.00;MQ=6      | DP: | :19364  | .5 | yes |
|    |   |   | 1   | S | 0.00;MQRankSum=0.00;QD    | GQ  | 8,1481  |    |     |
|    |   |   |     |   | =31.98;ReadPosRankSum=0   | :PL | 5,0     |    |     |
|    |   |   |     |   | .805;SOR=0.279            |     |         |    |     |
|    |   |   |     |   | AC=2;AF=1.00;AN=2;Base    |     |         |    |     |
|    |   |   |     |   | QRankSum=2.04;DP=5901;    | GT  | 1/1:6,  |    |     |
| 10 |   |   | 21  | P | ExcessHet=0.0000;FS=0.00  | :A  | 5628:5  |    |     |
| 19 | C | T | 78  | A | 0;MLEAC=2;MLEAF=1.00;     | D:  | 644:99  | BA |     |
| 8  |   |   | 85. | S | MQ=60.00;MQRankSum=-      | DP: | :21789  | .5 | yes |
|    |   |   | 1   | S | 3.340e-                   | GQ  | 9,1673  |    |     |
|    |   |   |     |   | 01;QD=27.51;ReadPosRank   | :PL | 2,0     |    |     |
|    |   |   |     |   | Sum=4.00;SOR=0.722        |     |         |    |     |
|    |   |   |     |   | AC=2;AF=1.00;AN=2;DP=     | GT  | 1/1:4,  |    |     |
| 10 |   |   | 19  | P | 4486;ExcessHet=0.0000;FS  | :A  | 4287:4  |    |     |
| 44 | G | A | 19  | A | =0.000;MLEAC=2;MLEAF      | D:  | 291:99  | BA |     |
| 7  |   |   | 66. | S | =1.00;MQ=60.00;QD=27.51   | DP: | :19198  | .5 | yes |
|    |   |   | 1   | S | ;SOR=1.144                | GQ  | 0,1274  |    |     |
|    |   |   |     |   |                           | :PL | 4,0     |    |     |
|    |   |   |     |   |                           | GT  | 1/1:0,  |    |     |
| 10 |   |   | 24  | P | AC=2;AF=1.00;AN=2;DP=     | :A  | 4451:4  |    |     |
| 44 | C | A | 06  | A | 5512;ExcessHet=0.0000;FS  | D:  | 530:99  | BA |     |
| 9  |   |   | 12. | S | =0.000;MLEAC=2;MLEAF      | DP: | :24062  | .5 | yes |
|    |   |   | 1   | S | =1.00;MQ=60.00;QD=28.08   | GQ  | 6,1615  |    |     |
|    |   |   |     |   | ;SOR=1.141                | :PL | 3,0     |    |     |
|    |   |   |     |   | AC=1;AF=0.500;AN=2;Bas    | GT  | 0/1:11  |    |     |
| 10 |   |   | 97  | P | eQRankSum=0.328;DP=179    | :A  | 98,519  | BA |     |
| 56 | T | A | 27. | A | 2;ExcessHet=0.0000;FS=0.0 | D:  | :1717:  | .5 | no  |
| 1  |   |   | 64  | S | 00;MLEAC=1;MLEAF=0.5      | DP: | 99:973  |    |     |



|    |     |     |   |                          |     |         |         |    |
|----|-----|-----|---|--------------------------|-----|---------|---------|----|
|    |     |     |   | 00;MQ=60.00;MQRankSum    | GQ  | 5,0,29  |         |    |
|    |     |     |   | =0.00;QD=5.67;ReadPosRa  | :PL | 440     |         |    |
|    |     |     |   | nkSum=0.235;SOR=0.654    |     |         |         |    |
|    |     |     |   |                          |     |         | 0 1:13, |    |
|    |     |     |   |                          |     |         | 4:17:9  |    |
|    |     |     |   |                          |     |         | 9:0 1:1 |    |
|    |     |     |   |                          |     |         | 0482_   |    |
|    |     |     |   |                          |     |         | GTTC    |    |
|    |     |     |   |                          |     |         | ATGT    |    |
|    |     |     |   | AC=1;AF=0.500;AN=2;Bas   | GT  | GGTA    |         |    |
|    |     |     |   | eQRankSum=-9.420e-       | :A  | GTGT    |         |    |
|    |     |     |   | 01;DP=17;ExcessHet=0.000 | D:  | TGGT    |         |    |
| 10 |     | 12  | P | 0;FS=0.000;MLEAC=1;ML    | DP: | TTTA    |         |    |
| 56 | G C | 1.6 | A | EAF=0.500;MQ=60.00;MQ    | GQ  | ACAT    | BA      | no |
| 5  |     | 4   | S | RankSum=0.00;QD=7.16;R   | :PG | AGAT    | .5      |    |
|    |     |     | S | eadPosRankSum=-          | T:P | TATG    |         |    |
|    |     |     |   | 2.001e+00;SOR=0.569      | ID: | ACTG    |         |    |
|    |     |     |   |                          | PL: | TGTC    |         |    |
|    |     |     |   |                          | PS  | TCTT    |         |    |
|    |     |     |   |                          |     | TTTG    |         |    |
|    |     |     |   |                          |     | TTAC    |         |    |
|    |     |     |   |                          |     | A_G:1   |         |    |
|    |     |     |   |                          |     | 29,0,5  |         |    |
|    |     |     |   |                          |     | 34:104  |         |    |
|    |     |     |   |                          |     | 82      |         |    |
|    |     |     |   |                          |     | 0 1:13, |         |    |
|    |     |     |   |                          |     | 4:17:9  |         |    |
|    |     |     |   |                          |     | 9:0 1:1 |         |    |
|    |     |     |   |                          |     | 0482_   |         |    |
|    |     |     |   |                          |     | GTTC    |         |    |
|    |     |     |   |                          | GT  | ATGT    |         |    |
|    |     |     |   | AC=1;AF=0.500;AN=2;Bas   | :A  | GGTA    |         |    |
|    |     |     |   | eQRankSum=-9.420e-       | D:  | GTGT    |         |    |
|    |     |     |   | 01;DP=17;ExcessHet=0.000 | DP: | TGGT    |         |    |
| 10 |     | 12  | P | 0;FS=0.000;MLEAC=1;ML    | GQ  | TTTA    | BA      | no |
| 56 | C G | 1.6 | A | EAF=0.500;MQ=60.00;MQ    | :PG | ACAT    | .5      |    |
| 8  |     | 4   | S | RankSum=0.00;QD=7.16;R   | T:P | AGAT    |         |    |
|    |     |     | S | eadPosRankSum=-          | ID: | TATG    |         |    |
|    |     |     |   | 2.459e+00;SOR=0.569      | PL: | ACTG    |         |    |
|    |     |     |   |                          | PS  | TGTC    |         |    |
|    |     |     |   |                          |     | TCTT    |         |    |
|    |     |     |   |                          |     | TTTG    |         |    |
|    |     |     |   |                          |     | TTAC    |         |    |
|    |     |     |   |                          |     | A_G:1   |         |    |
|    |     |     |   |                          |     | 29,0,5  |         |    |

|    |     |     |   |                           |     |         |    |  |        |  |     |  |
|----|-----|-----|---|---------------------------|-----|---------|----|--|--------|--|-----|--|
|    |     |     |   |                           |     |         |    |  | 34:104 |  |     |  |
|    |     |     |   |                           |     |         |    |  | 82     |  |     |  |
| 10 |     | 63  | P | AC=2;AF=1.00;AN=2;DP=     | GT  | 1 1:0,  |    |  |        |  |     |  |
| 61 | C T | 15  | A | 2314;ExcessHet=0.0000;FS  | :A  | 2110:2  |    |  |        |  |     |  |
| 5  |     | 6.0 | S | =0.000;MLEAC=2;MLEAF      | D:  | 112:99  | BA |  |        |  | yes |  |
|    |     | 6   | S | =1.00;MQ=60.00;QD=29.93   | DP: | :63170  | .5 |  |        |  |     |  |
|    |     |     |   | ;SOR=1.019                | GQ  | ,6380,  |    |  |        |  |     |  |
|    |     |     |   |                           | :PL | 0       |    |  |        |  |     |  |
|    |     |     |   |                           | GT  |         |    |  |        |  |     |  |
|    |     |     |   | AC=1;AF=0.500;AN=2;Bas    | :A  | 0 1:5,2 |    |  |        |  |     |  |
| 10 |     |     | P | eQRankSum=-3.660e-        | D:  | :7:69:  |    |  |        |  |     |  |
| 74 | A T | 61. | A | 01;DP=7;ExcessHet=0.0000  | DP: | 0 1:10  |    |  |        |  |     |  |
| 5  |     | 64  | S | ;FS=0.000;MLEAC=1;MLE     | GQ  | 740_A   | BA |  |        |  | no  |  |
|    |     |     | S | AF=0.500;MQ=60.00;MQR     | :PG | _AGA    | .5 |  |        |  |     |  |
|    |     |     | S | ankSum=0.00;QD=8.81;Rea   | T:P | TCTT    |    |  |        |  |     |  |
|    |     |     |   | dPosRankSum=-             | ID: | G:69,0  |    |  |        |  |     |  |
|    |     |     |   | 1.981e+00;SOR=0.446       | PL: | ,204:1  |    |  |        |  |     |  |
|    |     |     |   |                           | PS  | 0740    |    |  |        |  |     |  |
|    |     |     |   |                           | GT  |         |    |  |        |  |     |  |
|    |     |     |   | AC=1;AF=0.500;AN=2;Bas    | :A  | 0 1:5,2 |    |  |        |  |     |  |
| 10 |     |     | P | eQRankSum=-3.660e-        | D:  | :7:69:  |    |  |        |  |     |  |
| 74 | A C | 61. | A | 01;DP=7;ExcessHet=0.0000  | DP: | 0 1:10  |    |  |        |  |     |  |
| 6  |     | 64  | S | ;FS=0.000;MLEAC=1;MLE     | GQ  | 740_A   | BA |  |        |  | no  |  |
|    |     |     | S | AF=0.500;MQ=60.00;MQR     | :PG | _AGA    | .5 |  |        |  |     |  |
|    |     |     | S | ankSum=0.00;QD=8.81;Rea   | T:P | TCTT    |    |  |        |  |     |  |
|    |     |     |   | dPosRankSum=-             | ID: | G:69,0  |    |  |        |  |     |  |
|    |     |     |   | 1.981e+00;SOR=0.446       | PL: | ,204:1  |    |  |        |  |     |  |
|    |     |     |   |                           | PS  | 0740    |    |  |        |  |     |  |
|    |     |     |   |                           | GT  |         |    |  |        |  |     |  |
|    |     |     |   | AC=1;AF=0.500;AN=2;Bas    | :A  | 0 1:79  |    |  |        |  |     |  |
| 10 |     | 42  | P | eQRankSum=1.24;DP=270;    | D:  | ,176:2  |    |  |        |  |     |  |
| 80 | C T | 01. | A | ExcessHet=0.0000;FS=1.04  | DP: | 55:99:  | BA |  |        |  | no  |  |
| 9  |     | 64  | S | 0;MLEAC=1;MLEAF=0.50      | GQ  | 4209,0  | .5 |  |        |  |     |  |
|    |     |     | S | 0;MQ=60.00;MQRankSum=     | :PL | ,1373   |    |  |        |  |     |  |
|    |     |     |   | 0.00;QD=16.48;ReadPosRa   | GT  |         |    |  |        |  |     |  |
|    |     |     |   | nkSum=-8.770e-            | :A  | 1 1:0,1 |    |  |        |  |     |  |
|    |     |     |   | 01;SOR=0.785              | D:  | :1:3:1  |    |  |        |  |     |  |
|    |     |     |   |                           | DP: | 1:1083  |    |  |        |  |     |  |
| 10 |     |     | P | AC=2;AF=1.00;AN=2;DP=     | GQ  | 4_C_    | BA |  |        |  | no  |  |
| 83 | G A | 35. | A | 1;ExcessHet=0.0000;FS=0.0 | :PG | CCAA    | .5 |  |        |  |     |  |
| 5  |     | 48  | S | 00;MLEAC=1;MLEAF=0.5      | T:P | CAAT    |    |  |        |  |     |  |
|    |     |     | S | 00;MQ=60.00;QD=30.20;S    | ID: | :45,3,0 |    |  |        |  |     |  |
|    |     |     |   | OR=1.609                  | PL: | :10834  |    |  |        |  |     |  |
|    |     |     |   |                           | PS  |         |    |  |        |  |     |  |

|               |     |                |                  |                                                                                                                                                              |                                                                                                                                                                                                                                                                                                                                                                                                                                                                                                                          |          |     |
|---------------|-----|----------------|------------------|--------------------------------------------------------------------------------------------------------------------------------------------------------------|--------------------------------------------------------------------------------------------------------------------------------------------------------------------------------------------------------------------------------------------------------------------------------------------------------------------------------------------------------------------------------------------------------------------------------------------------------------------------------------------------------------------------|----------|-----|
| 11<br>26<br>6 | G T | 15<br>0.9<br>7 | P<br>A<br>S<br>S | AC=2;AF=1.00;AN=2;DP=6;ExcessHet=0.0000;FS=0.000;MLEAC=2;MLEAF=1.00;MQ=60.00;QD=25.16;SOR=0.693                                                              | GT<br>:A 1 1:0,<br>D: 6:6:18<br>DP: :165,1<br>GQ 8,0<br>:PL<br>GT<br>:A<br>D: 1 1:0,1<br>DP: :1:3:1 <br>GQ 1:1137<br>:PG 8_G_<br>T:P GA:45<br>ID: ,3,0:11<br>PL: 378<br>PS<br>GT<br>:A<br>D: 1 1:0,1<br>DP: :1:3:1 <br>GQ 1:1137<br>:PG 8_G_<br>T:P GA:45<br>ID: ,3,0:11<br>PL: 378<br>PS<br>GT<br>:A<br>D: 0 1:2,2<br>DP: :4:78:<br>GQ 0 1:11<br>:PG 410_G_<br>T:P _C:78,<br>ID: 0,78:1<br>PL: 1410<br>PS<br>GT<br>:A<br>D: 1 1:0,1<br>DP: :1:3:1 <br>GQ 1:1177<br>:PG 9_C_<br>T:P A:45,3<br>ID: ,0:117<br>PL: 79<br>PS | BA<br>.5 | yes |
| 11<br>38<br>1 | A G | 35.<br>48      | P<br>A<br>S<br>S | AC=2;AF=1.00;AN=2;DP=1;ExcessHet=0.0000;FS=0.000;MLEAC=1;MLEAF=0.500;MQ=60.00;QD=31.67;SOR=1.609                                                             | GT<br>:A<br>D: 1 1:0,1<br>DP: :1:3:1 <br>GQ 1:1137<br>:PG 8_G_<br>T:P GA:45<br>ID: ,3,0:11<br>PL: 378<br>PS<br>GT<br>:A<br>D: 1 1:0,1<br>DP: :1:3:1 <br>GQ 1:1137<br>:PG 8_G_<br>T:P GA:45<br>ID: ,3,0:11<br>PL: 378<br>PS<br>GT<br>:A<br>D: 0 1:2,2<br>DP: :4:78:<br>GQ 0 1:11<br>:PG 410_G_<br>T:P _C:78,<br>ID: 0,78:1<br>PL: 1410<br>PS<br>GT<br>:A<br>D: 1 1:0,1<br>DP: :1:3:1 <br>GQ 1:1177<br>:PG 9_C_<br>T:P A:45,3<br>ID: ,0:117<br>PL: 79<br>PS                                                                | BA<br>.5 | no  |
| 11<br>38<br>2 | G T | 35.<br>48      | P<br>A<br>S<br>S | AC=2;AF=1.00;AN=2;DP=1;ExcessHet=0.0000;FS=0.000;MLEAC=1;MLEAF=0.500;MQ=60.00;QD=29.53;SOR=1.609                                                             | GT<br>:A<br>D: 1 1:0,1<br>DP: :1:3:1 <br>GQ 1:1137<br>:PG 8_G_<br>T:P GA:45<br>ID: ,3,0:11<br>PL: 378<br>PS<br>GT<br>:A<br>D: 1 1:0,1<br>DP: :1:3:1 <br>GQ 1:1137<br>:PG 8_G_<br>T:P GA:45<br>ID: ,3,0:11<br>PL: 378<br>PS<br>GT<br>:A<br>D: 0 1:2,2<br>DP: :4:78:<br>GQ 0 1:11<br>:PG 410_G_<br>T:P _C:78,<br>ID: 0,78:1<br>PL: 1410<br>PS<br>GT<br>:A<br>D: 1 1:0,1<br>DP: :1:3:1 <br>GQ 1:1177<br>:PG 9_C_<br>T:P A:45,3<br>ID: ,0:117<br>PL: 79<br>PS                                                                | BA<br>.5 | no  |
| 11<br>41<br>0 | G C | 70.<br>64      | P<br>A<br>S<br>S | AC=1;AF=0.500;AN=2;BaseQRankSum=1.38;DP=6;ExcessHet=0.0000;FS=0.000;MLEAC=1;MLEAF=0.500;MQ=60.00;MQRankSum=0.00;QD=17.66;ReadPosRankSum=-1.383e+00;SOR=2.303 | GT<br>:A<br>D: 0 1:2,2<br>DP: :4:78:<br>GQ 0 1:11<br>:PG 410_G_<br>T:P _C:78,<br>ID: 0,78:1<br>PL: 1410<br>PS<br>GT<br>:A<br>D: 1 1:0,1<br>DP: :1:3:1 <br>GQ 1:1177<br>:PG 9_C_<br>T:P A:45,3<br>ID: ,0:117<br>PL: 79<br>PS                                                                                                                                                                                                                                                                                              | BA<br>.5 | no  |
| 11<br>77<br>9 | C A | 35.<br>48      | P<br>A<br>S<br>S | AC=2;AF=1.00;AN=2;DP=1;ExcessHet=0.0000;FS=0.000;MLEAC=1;MLEAF=0.500;MQ=60.00;QD=27.97;SOR=1.609                                                             | GT<br>:A<br>D: 1 1:0,1<br>DP: :1:3:1 <br>GQ 1:1177<br>:PG 9_C_<br>T:P A:45,3<br>ID: ,0:117<br>PL: 79<br>PS                                                                                                                                                                                                                                                                                                                                                                                                               | BA<br>.5 | no  |

|               |        |                      |                  |                                                                                                                                                                |                                                                                                                                                                                                                                                                                                   |          |     |
|---------------|--------|----------------------|------------------|----------------------------------------------------------------------------------------------------------------------------------------------------------------|---------------------------------------------------------------------------------------------------------------------------------------------------------------------------------------------------------------------------------------------------------------------------------------------------|----------|-----|
| 11<br>78<br>4 | T<br>G | 35.<br>48            | P<br>A<br>S<br>S | AC=2;AF=1.00;AN=2;DP=1;ExcessHet=0.0000;FS=0.000;MLEAC=1;MLEAF=0.500;MQ=60.00;QD=35.21;SOR=1.609                                                               | GT<br>:A<br>D: 1 1:0,1<br>DP: :1:3:1 <br>GQ 1:1177<br>:PG 9_C_<br>T:P A:45,3<br>ID: ,0:117<br>PL: 79<br>PS<br>GT<br>:A 0 1:7,2<br>D: :9:63:<br>DP: 0 1:11<br>GQ 801_G<br>:PG _GTT<br>T:P AAA<br>ID: CA:63<br>PL: ,0,268:<br>PS 11801                                                              | BA<br>.5 | no  |
| 11<br>80<br>4 | G<br>T | 55.<br>64            | P<br>A<br>S<br>S | AC=1;AF=0.500;AN=2;BaseQRankSum=0.319;DP=9;ExcessHet=0.0000;FS=0.000;MLEAC=1;MLEAF=0.500;MQ=60.00;MQRankSum=0.00;QD=6.18;ReadPosRankSum=-1.383e+00;SOR=0.495   | GT 1/1:15<br>:A ,4683:<br>D: 4698:9<br>DP: 9:1741<br>GQ 14,134<br>:PL 88,0<br>GT<br>:A 1 1:0,1<br>D: :1:3:1 <br>DP: 1:1192<br>GQ 0_T_<br>:PG G:45,3<br>T:P ,0:119<br>ID: 20<br>PL:<br>PS<br>GT 0 1:4,2<br>:A :6:72:<br>D: 0 1:12<br>DP: 036_C<br>GQ _CAT<br>:PG CA:72<br>T:P ,0,162:<br>ID: 12036 | BA<br>.5 | no  |
| 11<br>82<br>4 | C<br>T | 17<br>41<br>00.<br>1 | P<br>A<br>S<br>S | AC=2;AF=1.00;AN=2;BaseQRankSum=-2.339e+00;DP=4938;ExcessHet=0.0000;FS=0.000;MLEAC=2;MLEAF=1.00;MQ=60.00;MQRankSum=0.106;QD=23.23;ReadPosRankSum=4.61;SOR=0.232 | GT 1/1:15<br>:A ,4683:<br>D: 4698:9<br>DP: 9:1741<br>GQ 14,134<br>:PL 88,0<br>GT<br>:A 1 1:0,1<br>D: :1:3:1 <br>DP: 1:1192<br>GQ 0_T_<br>:PG G:45,3<br>T:P ,0:119<br>ID: 20<br>PL:<br>PS<br>GT 0 1:4,2<br>:A :6:72:<br>D: 0 1:12<br>DP: 036_C<br>GQ _CAT<br>:PG CA:72<br>T:P ,0,162:<br>ID: 12036 | BA<br>.5 | yes |
| 11<br>92<br>0 | T<br>G | 35.<br>48            | P<br>A<br>S<br>S | AC=2;AF=1.00;AN=2;DP=1;ExcessHet=0.0000;FS=0.000;MLEAC=1;MLEAF=0.500;MQ=60.00;QD=29.59;SOR=1.609                                                               | GT<br>:A<br>D: 1 1:0,1<br>DP: :1:3:1 <br>GQ 1:1192<br>:PG 0_T_<br>T:P G:45,3<br>ID: ,0:119<br>PL: 20<br>PS<br>GT<br>:A 0 1:4,2<br>D: :6:72:<br>DP: 0 1:12<br>GQ 036_C<br>:PG _CAT<br>T:P CA:72<br>ID: ,0,162:<br>12036                                                                            | BA<br>.5 | no  |
| 12<br>03<br>8 | G<br>T | 64.<br>64            | P<br>A<br>S<br>S | AC=1;AF=0.500;AN=2;BaseQRankSum=0.00;DP=6;ExcessHet=0.0000;FS=0.000;MLEAC=1;MLEAF=0.500;MQ=60.00;MQRankSum=0.00;QD=10.77;ReadPosRankSum=-1.834e+00;SOR=0.693   | GT<br>:A<br>D: 1 1:0,1<br>DP: :1:3:1 <br>GQ 1:1177<br>:PG 9_C_<br>T:P A:45,3<br>ID: ,0:117<br>PL: 79<br>PS<br>GT<br>:A 0 1:7,2<br>D: :9:63:<br>DP: 0 1:11<br>GQ 801_G<br>:PG _GTT<br>T:P AAA<br>ID: CA:63<br>PL: ,0,268:<br>PS 11801                                                              | BA<br>.5 | no  |

|    |    |   |   |   |     |    |     |   |   |   |   |   |                                                                                                                                                                                            |                                                               |                                                                  |    |    |     |
|----|----|---|---|---|-----|----|-----|---|---|---|---|---|--------------------------------------------------------------------------------------------------------------------------------------------------------------------------------------------|---------------------------------------------------------------|------------------------------------------------------------------|----|----|-----|
| 12 | 16 | 0 | G | A | 19  | 76 | 96. | 1 | P | A | S | S | AC=2;AF=1.00;AN=2;Base<br>QRankSum=1.96;DP=5451;<br>ExcessHet=0.0000;FS=0.00<br>0;MLEAC=2;MLEAF=1.00;<br>MQ=60.00;MQRankSum=0.<br>00;QD=29.03;ReadPosRank<br>Sum=4.36;SOR=0.203            | GT<br>:A<br>D:<br>DP:<br>GQ<br>:PL                            | 1/1:11<br>,5256:<br>5267:9<br>9:1977<br>10,154<br>56,0           | BA | .5 | yes |
| 12 | 25 | 8 | A | C | 35. | 48 |     |   | P | A | S | S | AC=2;AF=1.00;AN=2;DP=<br>1;ExcessHet=0.0000;FS=0.0<br>00;MLEAC=1;MLEAF=0.5<br>00;MQ=60.00;QD=34.86;S<br>OR=1.609                                                                           | GT<br>:A<br>D:<br>DP:<br>GQ<br>:PL                            | 1/1:0,<br>1:1:3:<br>45,3,0                                       | BA | .5 | no  |
| 12 | 31 | 0 | G | A | 20  | 57 | 06. | 1 | P | A | S | S | AC=2;AF=1.00;AN=2;Base<br>QRankSum=-<br>1.296e+00;DP=5547;Excess<br>Het=0.0000;FS=0.000;MLE<br>AC=2;MLEAF=1.00;MQ=6<br>0.00;MQRankSum=0.00;QD<br>=29.03;ReadPosRankSum=0<br>.707;SOR=0.465 | GT<br>:A<br>D:<br>DP:<br>GQ<br>:PL                            | 1/1:4,<br>5283:5<br>291:99<br>:20572<br>0,1576<br>8,0            | BA | .5 | yes |
| 12 | 88 | 0 | C | T | 16  | 89 | 81. | 1 | P | A | S | S | AC=2;AF=1.00;AN=2;DP=<br>5126;ExcessHet=0.0000;FS<br>=0.000;MLEAC=2;MLEAF<br>=1.00;MQ=60.00;QD=30.67<br>;SOR=0.882                                                                         | GT<br>:A<br>D:<br>DP:<br>GQ<br>:PL                            | 1/1:0,<br>4603:4<br>606:99<br>:16899<br>5,1384<br>4,0            | BA | .5 | yes |
| 13 | 69 | 8 | T | A | 70. | 64 |     |   | P | A | S | S | AC=1;AF=0.500;AN=2;Bas<br>eQRankSum=0.00;DP=4;Ex<br>cessHet=0.0000;FS=0.000;<br>MLEAC=1;MLEAF=0.500;<br>MQ=60.00;MQRankSum=0.<br>00;QD=17.66;ReadPosRank<br>Sum=1.38;SOR=0.693             | GT<br>:A<br>D:<br>DP:<br>GQ<br>:PG<br>T:P<br>ID:<br>PL:<br>PS | 0 1:2,2<br>:4:78:<br>0 1:13<br>698_T<br>_*:78,<br>0,78:1<br>3698 | BA | .5 | no  |
| 13 | 70 | 0 | A | C | 70. | 64 |     |   | P | A | S | S | AC=1;AF=0.500;AN=2;Bas<br>eQRankSum=0.00;DP=4;Ex<br>cessHet=0.0000;FS=0.000;<br>MLEAC=1;MLEAF=0.500;<br>MQ=60.00;MQRankSum=0.<br>00;QD=17.66;ReadPosRank<br>Sum=1.38;SOR=0.693             | GT<br>:A<br>D:<br>DP:<br>GQ<br>:PG<br>T:P                     | 0 1:2,2<br>:4:78:<br>0 1:13<br>698_T<br>_*:78,<br>0,78:1<br>3698 | BA | .5 | no  |

|               |   |   |           |                  |                                                                                                                                                        |                                                                                       |                                                                  |          |    |
|---------------|---|---|-----------|------------------|--------------------------------------------------------------------------------------------------------------------------------------------------------|---------------------------------------------------------------------------------------|------------------------------------------------------------------|----------|----|
| 13<br>70<br>8 | C | A | 70.<br>64 | P<br>A<br>S<br>S | AC=1;AF=0.500;AN=2;BaseQRankSum=0.00;DP=4;ExcessHet=0.0000;FS=0.000;MLEAC=1;MLEAF=0.500;MQ=60.00;MQRankSum=0.00;QD=17.66;ReadPosRankSum=1.38;SOR=0.693 | ID:<br>PL:<br>PS<br>GT<br>:A<br>D:<br>DP:<br>GQ<br>:PG<br>T:P<br>ID:<br>PL:           | 0 1:2,2<br>:4:78:<br>0 1:13<br>698_T<br>_*:78,<br>0,78:1<br>3698 | BA<br>.5 | no |
| 13<br>79<br>1 | A | C | 37.<br>32 | P<br>A<br>S<br>S | AC=2;AF=1.00;AN=2;DP=2;ExcessHet=0.0000;FS=0.000;MLEAC=1;MLEAF=0.500;MQ=60.00;QD=18.66;SOR=0.693                                                       | ID:<br>PL:<br>PS<br>GT<br>:A<br>D:<br>DP:<br>GQ<br>:PL<br>GT<br>:A<br>D:<br>DP:<br>GQ | 1/1:0,<br>2:2:6:<br>49,6,0                                       | BA<br>.5 | no |
| 13<br>87<br>6 | C | A | 78.<br>32 | P<br>A<br>S<br>S | AC=2;AF=1.00;AN=2;DP=2;ExcessHet=0.0000;FS=0.000;MLEAC=1;MLEAF=0.500;MQ=60.00;QD=28.53;SOR=0.693                                                       | ID:<br>PL:<br>PS<br>GT<br>:A<br>D:<br>DP:<br>GQ<br>:PG<br>T:P<br>ID:<br>PL:           | 1 1:0,2<br>:2:6:1 <br>1:1387<br>6_C_<br>A:90,6<br>,0:138<br>76   | BA<br>.5 | no |
| 13<br>87<br>8 | T | C | 78.<br>32 | P<br>A<br>S<br>S | AC=2;AF=1.00;AN=2;DP=2;ExcessHet=0.0000;FS=0.000;MLEAC=1;MLEAF=0.500;MQ=60.00;QD=27.23;SOR=0.693                                                       | ID:<br>PL:<br>PS<br>GT<br>:A<br>D:<br>DP:<br>GQ<br>:PG<br>T:P<br>ID:<br>PL:           | 1 1:0,2<br>:2:6:1 <br>1:1387<br>6_C_<br>A:90,6<br>,0:138<br>76   | BA<br>.5 | no |
| 13<br>87<br>9 | G | A | 78.<br>32 | P<br>A<br>S<br>S | AC=2;AF=1.00;AN=2;DP=2;ExcessHet=0.0000;FS=0.000;MLEAC=1;MLEAF=0.500;MQ=60.00;QD=29.52;SOR=0.693                                                       | ID:<br>PL:<br>PS<br>GT<br>:A<br>D:<br>DP:<br>GQ<br>:PG<br>T:P                         | 1 1:0,2<br>:2:6:1 <br>1:1387<br>6_C_<br>A:90,6<br>,0:138<br>76   | BA<br>.5 | no |

| ID:           | PL: | PS                   |                  |                                                                                                                                                                |                                                               |                                                                           |          |     |
|---------------|-----|----------------------|------------------|----------------------------------------------------------------------------------------------------------------------------------------------------------------|---------------------------------------------------------------|---------------------------------------------------------------------------|----------|-----|
| 14<br>18<br>1 | G C | 35<br>90.<br>64      | P<br>A<br>S<br>S | AC=1;AF=0.500;AN=2;BaseQRankSum=0.100;DP=654;ExcessHet=0.0000;FS=1.190;MLEAC=1;MLEAF=0.500;MQ=60.00;MQRankSum=0.00;QD=5.75;ReadPosRankSum=2.76;SOR=0.632       | GT<br>:A<br>D:<br>DP:<br>GQ<br>:PL                            | 0/1:42<br>3,201:<br>624:99<br>:3598,<br>0,9674                            | BA<br>.5 | no  |
| 14<br>26<br>5 | C T | 28<br>70<br>3.0<br>6 | P<br>A<br>S<br>S | AC=2;AF=1.00;AN=2;DP=1070;ExcessHet=0.0000;FS=0.000;MLEAC=2;MLEAF=1.00;MQ=60.00;QD=27.98;SOR=0.705                                                             | GT<br>:A<br>D:<br>DP:<br>GQ<br>:PL                            | 1/1:0,<br>1026:1<br>026:99<br>:28717<br>,3074,<br>0                       | BA<br>.5 | yes |
| 14<br>35<br>9 | A G | 61.<br>64            | P<br>A<br>S<br>S | AC=1;AF=0.500;AN=2;BaseQRankSum=0.524;DP=10;ExcessHet=0.0000;FS=0.000;MLEAC=1;MLEAF=0.500;MQ=60.00;MQRankSum=0.00;QD=6.16;ReadPosRankSum=0.859;SOR=0.693       | GT<br>:A<br>D:<br>DP:<br>GQ<br>:PL                            | 0/1:6,<br>4:10:6<br>9:69,0,<br>104                                        | BA<br>.5 | no  |
| 14<br>39<br>5 | A G | 68<br>1.6<br>4       | P<br>A<br>S<br>S | AC=1;AF=0.500;AN=2;BaseQRankSum=-1.447e+00;DP=58;ExcessHet=0.0000;FS=1.022;MLEAC=1;MLEAF=0.500;MQ=60.00;MQRankSum=0.00;QD=11.96;ReadPosRankSum=0.073;SOR=0.495 | GT<br>:A<br>D:<br>DP:<br>GQ<br>:PG<br>T:P<br>ID:<br>PL:<br>PS | 0 1:25,<br>32:57:<br>99:0 1:<br>14395<br>_A_G:<br>689,0,<br>567:14<br>395 | BA<br>.5 | no  |
| 14<br>40<br>8 | C T | 19<br>37<br>73.<br>1 | P<br>A<br>S<br>S | AC=2;AF=1.00;AN=2;BaseQRankSum=1.82;DP=5338;ExcessHet=0.0000;FS=0.000;MLEAC=2;MLEAF=1.00;MQ=60.00;MQRankSum=-5.940e-01;QD=26.61;ReadPosRankSum=0.703;SOR=0.297 | GT<br>:A<br>D:<br>DP:<br>GQ<br>:PL                            | 1/1:1,<br>5119:5<br>120:99<br>:19378<br>7,1536<br>3,0                     | BA<br>.5 | yes |
| 14<br>67<br>3 | A G | 77.<br>84            | P<br>A<br>S<br>S | AC=2;AF=1.00;AN=2;DP=4;ExcessHet=0.0000;FS=0.000;MLEAC=1;MLEAF=0.500;MQ=60.00;QD=25.95;SOR=1.179                                                               | GT<br>:A<br>D:<br>DP:                                         | 1/1:0,<br>3:3:9:<br>91,9,0                                                | BA<br>.5 | yes |

|    |   |   |     |   |                                                                                                  |     |         |    |     |
|----|---|---|-----|---|--------------------------------------------------------------------------------------------------|-----|---------|----|-----|
| 14 | G | A | 31. | P | AC=1;AF=0.500;AN=2;BaseQRankSum=0.00;DP=2;ExcessHet=0.0000;FS=0.000;                             | GQ  |         |    |     |
| 87 |   |   | 64  | A | MLEAC=1;MLEAF=0.500;                                                                             | :PL |         |    |     |
| 4  |   |   |     | S | MQ=60.00;MQRankSum=0.00;QD=15.82;ReadPosRankSum=-6.740e-01;SOR=0.693                             | GT  |         |    |     |
|    |   |   |     | S |                                                                                                  | :A  | 0 1:1,1 |    |     |
|    |   |   |     |   |                                                                                                  | D:  | :2:39:  |    |     |
|    |   |   |     |   |                                                                                                  | DP: | 0 1:14  | BA | no  |
|    |   |   |     |   |                                                                                                  | GQ  | 874_G   | .5 |     |
|    |   |   |     |   |                                                                                                  | :PG | _A:39,  |    |     |
|    |   |   |     |   |                                                                                                  | T:P | 0,39:1  |    |     |
|    |   |   |     |   |                                                                                                  | ID: | 4874    |    |     |
|    |   |   |     |   |                                                                                                  | PL: |         |    |     |
|    |   |   |     |   |                                                                                                  | PS  |         |    |     |
|    |   |   |     |   |                                                                                                  | GT  |         |    |     |
| 14 | C | T | 31. | P | AC=1;AF=0.500;AN=2;BaseQRankSum=0.00;DP=2;ExcessHet=0.0000;FS=0.000;                             | :A  | 0 1:1,1 |    |     |
| 87 |   |   | 64  | A | MLEAC=1;MLEAF=0.500;                                                                             | D:  | :2:39:  |    |     |
| 7  |   |   |     | S | MQ=60.00;MQRankSum=0.00;QD=15.82;ReadPosRankSum=-6.740e-01;SOR=0.693                             | DP: | 0 1:14  | BA | yes |
|    |   |   |     | S |                                                                                                  | GQ  | 874_G   | .5 |     |
|    |   |   |     |   |                                                                                                  | :PG | _A:39,  |    |     |
|    |   |   |     |   |                                                                                                  | T:P | 0,39:1  |    |     |
|    |   |   |     |   |                                                                                                  | ID: | 4874    |    |     |
|    |   |   |     |   |                                                                                                  | PL: |         |    |     |
|    |   |   |     |   |                                                                                                  | PS  |         |    |     |
|    |   |   |     |   |                                                                                                  | GT  |         |    |     |
| 14 | G | T | 35. | P | AC=2;AF=1.00;AN=2;DP=1;ExcessHet=0.0000;FS=0.000;MLEAC=1;MLEAF=0.500;MQ=60.00;QD=29.95;SOR=1.609 | :A  | 1 1:0,1 |    |     |
| 88 |   |   | 48  | A |                                                                                                  | D:  | :1:3:1  |    |     |
| 5  |   |   |     | S |                                                                                                  | DP: | 1:1488  | BA | no  |
|    |   |   |     | S |                                                                                                  | GQ  | 3_T_T   | .5 |     |
|    |   |   |     |   |                                                                                                  | :PG | A:45,3  |    |     |
|    |   |   |     |   |                                                                                                  | T:P | ,0:148  |    |     |
|    |   |   |     |   |                                                                                                  | ID: | 83      |    |     |
|    |   |   |     |   |                                                                                                  | PL: |         |    |     |
|    |   |   |     |   |                                                                                                  | PS  |         |    |     |
|    |   |   |     |   |                                                                                                  | GT  |         |    |     |
| 14 | C | T | 35. | P | AC=2;AF=1.00;AN=2;DP=1;ExcessHet=0.0000;FS=0.000;MLEAC=1;MLEAF=0.500;MQ=60.00;QD=30.22;SOR=1.609 | :A  | 1 1:0,1 |    |     |
| 88 |   |   | 48  | A |                                                                                                  | D:  | :1:3:1  |    |     |
| 9  |   |   |     | S |                                                                                                  | DP: | 1:1488  | BA | no  |
|    |   |   |     | S |                                                                                                  | GQ  | 3_T_T   | .5 |     |
|    |   |   |     |   |                                                                                                  | :PG | A:45,3  |    |     |
|    |   |   |     |   |                                                                                                  | T:P | ,0:148  |    |     |
|    |   |   |     |   |                                                                                                  | ID: | 83      |    |     |
|    |   |   |     |   |                                                                                                  | PL: |         |    |     |
|    |   |   |     |   |                                                                                                  | PS  |         |    |     |
|    |   |   |     |   |                                                                                                  | GT  |         |    |     |
| 15 | G | T | 78. | P | AC=2;AF=1.00;AN=2;DP=2;ExcessHet=0.0000;FS=0.000;MLEAC=1;MLEAF=0.500                             | :A  | :2:6:1  | BA | no  |
| 26 |   |   | 32  | A |                                                                                                  | D:  | 1:1525  | .5 |     |
| 2  |   |   |     | S |                                                                                                  | DP: | 9_A_    |    |     |



|               |     |                      |                  |                                                                                                                                                                |                                                                                                                                                                                                                                                                                                                 |
|---------------|-----|----------------------|------------------|----------------------------------------------------------------------------------------------------------------------------------------------------------------|-----------------------------------------------------------------------------------------------------------------------------------------------------------------------------------------------------------------------------------------------------------------------------------------------------------------|
|               |     |                      |                  | 00;MQ=60.00;QD=31.18;S<br>OR=0.693                                                                                                                             | GQ ATAG<br>:PG GG:90<br>T:P ,6,0:15<br>ID: 259<br>PL:<br>PS<br>GT<br>:A 1 1:0,2<br>D: :2:6:1 <br>DP: 1:1525<br>GQ 9_A_ BA<br>:PG ATAG .5 no<br>T:P GG:90<br>ID: ,6,0:15<br>PL: 259<br>PS<br>GT<br>:A 1 1:0,2<br>D: :2:6:1 <br>DP: 1:1526<br>GQ 7_A_ BA<br>:PG G:90,6 .5 no<br>T:P ,0:152<br>ID: 67<br>PL:<br>PS |
| 15<br>26<br>3 | A T | 78.<br>32            | P<br>A<br>S<br>S | AC=2;AF=1.00;AN=2;DP=2;ExcessHet=0.0000;FS=0.000;MLEAC=1;MLEAF=0.500;MQ=60.00;QD=28.65;S<br>OR=0.693                                                           |                                                                                                                                                                                                                                                                                                                 |
| 15<br>26<br>7 | A G | 78.<br>32            | P<br>A<br>S<br>S | AC=2;AF=1.00;AN=2;DP=4;ExcessHet=0.0000;FS=0.000;MLEAC=1;MLEAF=0.500;MQ=60.00;QD=25.00;S<br>OR=0.693                                                           |                                                                                                                                                                                                                                                                                                                 |
| 15<br>34<br>2 | C T | 50<br>75<br>3.0<br>6 | P<br>A<br>S<br>S | AC=2;AF=1.00;AN=2;BaseQRankSum=2.04;DP=1953;ExcessHet=0.0000;FS=0.000;MLEAC=2;MLEAF=1.00;MQ=60.00;MQRankSum=0.000;QD=34.76;ReadPosRankSum=-4.700e-02;SOR=0.775 | GT 1/1:2,<br>:A 1458:1<br>D: 466:99 BA<br>DP: :50767 .5 no<br>GQ ,5346,<br>:PL 0                                                                                                                                                                                                                                |
| 15<br>35<br>2 | C T | 28<br>91<br>6.0<br>6 | P<br>A<br>S<br>S | AC=2;AF=1.00;AN=2;DP=1102;ExcessHet=0.0000;FS=0.000;MLEAC=2;MLEAF=1.00;MQ=60.00;QD=26.97;SOR=0.742                                                             | GT 1/1:0,<br>:A 1072:1<br>D: 072:99 BA<br>DP: :28930 .5 no<br>GQ ,3210,<br>:PL 0                                                                                                                                                                                                                                |
| 15<br>71<br>4 | C T | 20<br>67<br>70.<br>1 | P<br>A<br>S<br>S | AC=2;AF=1.00;AN=2;BaseQRankSum=-5.320e-01;DP=5762;ExcessHet=0.000;FS=0.000;MLEAC=2;MLEAF=1.00;MQ=60.00;MQRankSum=0.000;QD=29.20                                | GT 1/1:1,<br>:A 3007:3<br>D: 092:99 BA<br>DP: :20678 .5 yes<br>GQ 4,1649<br>:PL 3,0                                                                                                                                                                                                                             |

|               |        |                      |                  |                                                                                                                                                                                           |                                                               |                                                                   |          |     |
|---------------|--------|----------------------|------------------|-------------------------------------------------------------------------------------------------------------------------------------------------------------------------------------------|---------------------------------------------------------------|-------------------------------------------------------------------|----------|-----|
| 16<br>37<br>7 | G<br>A | 14<br>87<br>65.<br>1 | P<br>A<br>S<br>S | ;ReadPosRankSum=1.05;SOR=0.467<br>AC=2;AF=1.00;AN=2;BaseQRankSum=2.06;DP=4464;ExcessHet=0.0000;FS=0.000;MLEAC=2;MLEAF=1.00;MQ=60.00;MQRankSum=0.00;QD=30.62;ReadPosRankSum=1.72;SOR=0.371 | GT<br>:A<br>D:<br>DP:<br>GQ<br>:PL                            | 1/1:1,<br>3409:3<br>435:99<br>:14877<br>9,1261<br>5,0             | BA<br>.5 | no  |
| 16<br>45<br>6 | T<br>C | 16<br>7.9<br>7       | P<br>A<br>S<br>S | AC=2;AF=1.00;AN=2;DP=6;ExcessHet=0.0000;FS=0.000;MLEAC=2;MLEAF=1.00;MQ=60.00;QD=28.00;SOR=0.693                                                                                           | GT<br>:A<br>D:<br>DP:<br>GQ<br>:PL                            | 1/1:0,<br>6:6:18<br>:182,1<br>8,0                                 | BA<br>.5 | yes |
| 16<br>61<br>6 | C<br>A | 21<br>51<br>43.<br>1 | P<br>A<br>S<br>S | AC=2;AF=1.00;AN=2;DP=5666;ExcessHet=0.0000;FS=0.000;MLEAC=2;MLEAF=1.00;MQ=60.00;QD=28.55;SOR=0.943                                                                                        | GT<br>:A<br>D:<br>DP:<br>GQ<br>:PL                            | 1/1:0,<br>5381:5<br>409:99<br>:21515<br>7,1655<br>5,0             | BA<br>.5 | yes |
| 16<br>88<br>7 | C<br>T | 22<br>54<br>24.<br>1 | P<br>A<br>S<br>S | AC=2;AF=1.00;AN=2;BaseQRankSum=1.36;DP=5879;ExcessHet=0.0000;FS=0.000;MLEAC=2;MLEAF=1.00;MQ=60.00;MQRankSum=0.00;QD=34.42;ReadPosRankSum=4.16;SOR=0.201                                   | GT<br>:A<br>D:<br>DP:<br>GQ<br>:PL                            | 1/1:9,<br>4791:4<br>807:99<br>:22543<br>8,1681<br>9,0             | BA<br>.5 | yes |
| 17<br>13<br>0 | C<br>T | 90<br>09<br>0.0<br>6 | P<br>A<br>S<br>S | AC=2;AF=1.00;AN=2;BaseQRankSum=0.294;DP=2982;ExcessHet=0.0000;FS=0.000;MLEAC=2;MLEAF=1.00;MQ=60.00;MQRankSum=0.00;QD=31.51;ReadPosRankSum=0.138;SOR=0.435                                 | GT<br>:A<br>D:<br>DP:<br>GQ<br>:PL                            | 1/1:16<br>,2843:<br>2869:9<br>9:9010<br>4,7965<br>,0              | BA<br>.5 | yes |
| 17<br>18<br>6 | T<br>C | 58.<br>64            | P<br>A<br>S<br>S | AC=1;AF=0.500;AN=2;BaseQRankSum=0.319;DP=8;ExcessHet=0.0000;FS=0.000;MLEAC=1;MLEAF=0.500;MQ=60.00;MQRankSum=0.00;QD=7.33;ReadPosRankSum=2.10;SOR=0.693                                    | GT<br>:A<br>D:<br>DP:<br>GQ<br>:PG<br>T:P<br>ID:<br>PL:<br>PS | 0 1:6,2<br>:8:66:<br>0 1:17<br>186_T<br>_C:66,<br>0,246:<br>17186 | BA<br>.5 | no  |

|               |        |                      |                  |                                                                                                                                                                                           |                                                               |                                                                          |          |     |
|---------------|--------|----------------------|------------------|-------------------------------------------------------------------------------------------------------------------------------------------------------------------------------------------|---------------------------------------------------------------|--------------------------------------------------------------------------|----------|-----|
| 17<br>20<br>8 | T<br>C | 22<br>68<br>69.<br>1 | P<br>A<br>S<br>S | AC=2;AF=1.00;AN=2;Base<br>QRankSum=2.34;DP=5909;<br>ExcessHet=0.0000;FS=0.00<br>0;MLEAC=2;MLEAF=1.00;<br>MQ=60.00;MQRankSum=0.<br>00;QD=28.53;ReadPosRank<br>Sum=1.03;SOR=0.635           | GT<br>:A<br>D:<br>DP:<br>GQ<br>:PL                            | 1/1:5,<br>5746:5<br>751:99<br>:22688<br>3,1710<br>7,0                    | BA<br>.5 | yes |
| 17<br>41<br>0 | C<br>T | 20<br>79<br>96.<br>1 | P<br>A<br>S<br>S | AC=2;AF=1.00;AN=2;DP=<br>5545;ExcessHet=0.0000;FS<br>=0.000;MLEAC=2;MLEAF<br>=1.00;MQ=60.00;QD=27.23<br>;SOR=1.142                                                                        | GT<br>:A<br>D:<br>DP:<br>GQ<br>:PL                            | 1/1:0,<br>5301:5<br>305:99<br>:20801<br>0,1597<br>4,0                    | BA<br>.5 | yes |
| 17<br>74<br>6 | C<br>T | 83<br>13<br>2.0<br>6 | P<br>A<br>S<br>S | AC=2;AF=1.00;AN=2;DP=<br>2803;ExcessHet=0.0000;FS<br>=0.000;MLEAC=2;MLEAF<br>=1.00;MQ=60.00;QD=30.61<br>;SOR=0.972                                                                        | GT<br>:A<br>D:<br>DP:<br>GQ<br>:PL                            | 1/1:0,<br>2716:2<br>716:99<br>:83146<br>,8148,<br>0                      | BA<br>.5 | yes |
| 18<br>16<br>0 | G<br>A | 75<br>14<br>1.0<br>6 | P<br>A<br>S<br>S | AC=2;AF=1.00;AN=2;DP=<br>1801;ExcessHet=0.0000;FS<br>=0.000;MLEAC=2;MLEAF<br>=1.00;MQ=60.00;QD=29.56<br>;SOR=0.838                                                                        | GT<br>:A<br>D:<br>DP:<br>GQ<br>:PL                            | 1/1:0,<br>1722:1<br>740:99<br>:75155<br>,5190,<br>0                      | BA<br>.5 | yes |
| 18<br>16<br>3 | A<br>G | 18<br>98<br>40.<br>1 | P<br>A<br>S<br>S | AC=2;AF=1.00;AN=2;Base<br>QRankSum=-<br>1.072e+00;DP=5361;Excess<br>Het=0.0000;FS=0.000;MLE<br>AC=2;MLEAF=1.00;MQ=6<br>0.00;MQRankSum=0.00;QD<br>=29.52;ReadPosRankSum=3<br>.28;SOR=0.947 | GT<br>:A<br>D:<br>DP:<br>GQ<br>:PL                            | 1/1:4,<br>4983:4<br>987:99<br>:18985<br>4,1485<br>4,0                    | BA<br>.5 | yes |
| 18<br>20<br>6 | C<br>A | 35.<br>48            | P<br>A<br>S<br>S | AC=2;AF=1.00;AN=2;DP=<br>1;ExcessHet=0.0000;FS=0.0<br>00;MLEAC=1;MLEAF=0.5<br>00;MQ=60.00;QD=35.95;S<br>OR=1.609                                                                          | GT<br>:A<br>D:<br>DP:<br>GQ<br>:PG<br>T:P<br>ID:<br>PL:<br>PS | 1 1:0,1<br>:1:3:1 <br>1:1820<br>4_C_<br>CAGC<br>TTT:4<br>5,3,0:1<br>8204 | BA<br>.5 | no  |
| 18<br>26<br>1 | C<br>T | 47.<br>64            | P<br>A           | AC=1;AF=0.500;AN=2;Bas<br>eQRankSum=0.674;DP=12;<br>ExcessHet=0.0000;FS=0.00                                                                                                              | GT<br>:A<br>D:                                                | 0/1:9,<br>3:12:5                                                         | BA<br>.5 | no  |

|    |     |     |   |                           |             |    |  |    |
|----|-----|-----|---|---------------------------|-------------|----|--|----|
|    |     |     | S | 0;MLEAC=1;MLEAF=0.50      | DP: 5:55,0, |    |  |    |
|    |     |     | S | 0;MQ=60.00;MQRankSum=     | GQ 204      |    |  |    |
|    |     |     |   | 0.00;QD=3.97;ReadPosRan   | :PL         |    |  |    |
|    |     |     |   | kSum=-                    |             |    |  |    |
|    |     |     |   | 2.278e+00;SOR=0.941       |             |    |  |    |
| 18 |     | 15  | P | AC=2;AF=1.00;AN=2;DP=     | GT 1/1:0,   |    |  |    |
| 26 | G T | 99  | A | 601;ExcessHet=0.0000;FS=  | :A 577:57   |    |  |    |
| 6  |     | 0.0 | S | 0.000;MLEAC=2;MLEAF=      | D: 7:99:1   | BA |  | no |
|    |     | 6   | S | 1.00;MQ=60.00;QD=27.71;   | DP: 6004,1  | .5 |  |    |
|    |     |     |   | SOR=0.739                 | GQ 730,0    |    |  |    |
|    |     |     |   |                           | :PL         |    |  |    |
| 18 |     |     | P | AC=2;AF=1.00;AN=2;DP=     | GT          |    |  |    |
| 57 | G A | 37. | A | 2;ExcessHet=0.0000;FS=0.0 | :A 1/1:0,   |    |  |    |
| 4  |     | 32  | S | 00;MLEAC=1;MLEAF=0.5      | D: 2:2:6:   | BA |  | no |
|    |     |     | S | 00;MQ=60.00;QD=18.66;S    | DP: 49,6,0  | .5 |  |    |
|    |     |     |   | OR=0.693                  | GQ          |    |  |    |
|    |     |     |   |                           | :PL         |    |  |    |
| 18 |     |     | P | AC=1;AF=0.500;AN=2;Bas    | GT          |    |  |    |
| 68 | G C | 43. | A | eQRankSum=0.00;DP=8;Ex    | :A 0/1:5,   |    |  |    |
| 6  |     | 64  | S | cessHet=0.0000;FS=3.332;  | D: 3:8:51   | BA |  | no |
|    |     |     | S | MLEAC=1;MLEAF=0.500;      | DP: :51,0,1 | .5 |  |    |
|    |     |     |   | MQ=60.00;MQRankSum=0.     | GQ 02       |    |  |    |
|    |     |     |   | 00;QD=5.45;ReadPosRankS   | :PL         |    |  |    |
|    |     |     |   | um=0.272;SOR=2.303        |             |    |  |    |
| 19 |     |     | P | AC=2;AF=1.00;AN=2;Base    | GT 1/1:1,   |    |  |    |
| 01 | C T | 51  | A | QRankSum=-                | :A 1792:1   |    |  |    |
| 8  |     | 28  | S | 1.903e+00;DP=1843;Excess  | D: 793:99   | BA |  | no |
|    |     | 0.0 | S | Het=0.0000;FS=0.000;MLE   | DP: :51294  | .5 |  |    |
|    |     | 6   |   | AC=2;MLEAF=1.00;MQ=6      | GQ ,5336,   |    |  |    |
|    |     |     |   | 0.00;MQRankSum=0.00;QD    | :PL 0       |    |  |    |
|    |     |     |   | =28.60;ReadPosRankSum=-   |             |    |  |    |
|    |     |     |   | 1.644e+00;SOR=0.303       |             |    |  |    |
|    |     |     |   |                           | GT          |    |  |    |
| 19 |     |     | P | AC=1;AF=0.500;AN=2;Bas    | :A 0 1:8,2  |    |  |    |
| 04 | A T | 52. | A | eQRankSum=0.00;DP=10;E    | D: :10:60   |    |  |    |
| 6  |     | 64  | S | xcessHet=0.0000;FS=0.000; | DP: :0 1:19 |    |  |    |
|    |     |     | S | MLEAC=1;MLEAF=0.500;      | GQ 042_C    | BA |  | no |
|    |     |     |   | MQ=60.00;MQRankSum=0.     | :PG _CGG    | .5 |  |    |
|    |     |     |   | 00;QD=5.26;ReadPosRankS   | T:P :60,0,3 |    |  |    |
|    |     |     |   | um=-2.287e+00;SOR=0.693   | ID: 30:190  |    |  |    |
|    |     |     |   |                           | PL: 42      |    |  |    |
|    |     |     |   |                           | PS          |    |  |    |
| 19 |     | 81  | P | AC=1;AF=0.500;AN=2;Bas    | GT 0/1:69   |    |  |    |
| 59 | C T | 65. | A | eQRankSum=0.622;DP=120    | :A 5,388:   | BA |  | no |
| 6  |     | 64  | S | 8;ExcessHet=0.0000;FS=1.1 | D: 1083:9   | .5 |  |    |
|    |     |     | S | 52;MLEAC=1;MLEAF=0.5      | DP: 9:8173  |    |  |    |

|               |        |                      |                  |  |                                                                                                                                                                                             |                                                         |                                                                |          |     |
|---------------|--------|----------------------|------------------|--|---------------------------------------------------------------------------------------------------------------------------------------------------------------------------------------------|---------------------------------------------------------|----------------------------------------------------------------|----------|-----|
|               |        |                      |                  |  | 00;MQ=60.00;MQRankSum<br>=0.00;QD=7.54;ReadPosRa<br>nkSum=2.85;SOR=0.711                                                                                                                    | GQ<br>:PL                                               | ,0,169<br>23                                                   |          |     |
| 19<br>89<br>0 | A<br>G | 37.<br>32            | P<br>A<br>S<br>S |  | AC=2;AF=1.00;AN=2;DP=<br>2;ExcessHet=0.0000;FS=0.0<br>00;MLEAC=1;MLEAF=0.5<br>00;MQ=60.00;QD=18.66;S<br>OR=0.693                                                                            | GT<br>:A<br>D:<br>DP:<br>GQ<br>:PL                      | 1/1:0,<br>2:2:6:<br>49,6,0                                     | BA<br>.5 | no  |
| 19<br>95<br>5 | C<br>T | 21<br>97<br>06.<br>1 | P<br>A<br>S<br>S |  | AC=2;AF=1.00;AN=2;DP=<br>5728;ExcessHet=0.0000;FS<br>=0.000;MLEAC=2;MLEAF<br>=1.00;MQ=60.00;QD=33.47<br>;SOR=0.879                                                                          | GT<br>:A<br>D:<br>DP:<br>GQ<br>:PL                      | 1/1:0,<br>5619:5<br>619:99<br>:21972<br>0,1689<br>6,0          | BA<br>.5 | yes |
| 20<br>05<br>5 | A<br>G | 19<br>88<br>85.<br>1 | P<br>A<br>S<br>S |  | AC=2;AF=1.00;AN=2;Base<br>QRankSum=0.272;DP=5685<br>;ExcessHet=0.0000;FS=0.00<br>0;MLEAC=2;MLEAF=1.00;<br>MQ=60.00;MQRankSum=0.<br>089;QD=32.91;ReadPosRan<br>kSum=-5.190e-<br>01;SOR=0.416 | GT<br>:A<br>D:<br>DP:<br>GQ<br>:PL                      | 1/1:4,<br>4322:4<br>326:99<br>:19889<br>9,1547<br>8,0          | BA<br>.5 | yes |
| 20<br>45<br>6 | T<br>A | 35.<br>48            | P<br>A<br>S<br>S |  | AC=2;AF=1.00;AN=2;DP=<br>1;ExcessHet=0.0000;FS=0.0<br>00;MLEAC=1;MLEAF=0.5<br>00;MQ=60.00;QD=33.53;S<br>OR=1.609                                                                            | GT<br>:A<br>D:<br>DP:<br>GQ<br>:PG<br>T:P<br>ID:<br>PL: | 1 1:0,1<br>:1:3:1 <br>1:2045<br>6_T_<br>A:45,3<br>,0:204<br>56 | BA<br>.5 | no  |
| 20<br>45<br>7 | C<br>T | 77.<br>84            | P<br>A<br>S<br>S |  | AC=2;AF=1.00;AN=2;DP=<br>3;ExcessHet=0.0000;FS=0.0<br>00;MLEAC=1;MLEAF=0.5<br>00;MQ=60.00;QD=25.95;S<br>OR=1.179                                                                            | GT<br>:A<br>D:<br>DP:<br>GQ<br>:PL                      | 1/1:0,<br>3:3:9:<br>91,9,0                                     | BA<br>.5 | no  |
| 20<br>45<br>9 | T<br>A | 35.<br>48            | P<br>A<br>S<br>S |  | AC=2;AF=1.00;AN=2;DP=<br>1;ExcessHet=0.0000;FS=0.0<br>00;MLEAC=1;MLEAF=0.5<br>00;MQ=60.00;QD=36.33;S<br>OR=1.609                                                                            | GT<br>:A<br>D:<br>DP:<br>GQ<br>:PG<br>T:P               | 1 1:0,1<br>:1:3:1 <br>1:2045<br>6_T_<br>A:45,3<br>,0:204<br>56 | BA<br>.5 | no  |



| ID:   | PL: | PS | AC=1;AF=0.500;AN=2;BaseQRankSum=-4.550e-01;DP=336;ExcessHet=0.000;FS=0.877;MLEAC=1;MLEAF=0.500;MQ=60.00;MQRankSum=0.00;QD=11.67;ReadPosRankSum=-1.092e+00;SOR=0.639 | GT               | :A                                                                                                                                                                 | D: | DP: | GQ                                                                                                                  | :PL | BA  | no  |
|-------|-----|----|---------------------------------------------------------------------------------------------------------------------------------------------------------------------|------------------|--------------------------------------------------------------------------------------------------------------------------------------------------------------------|----|-----|---------------------------------------------------------------------------------------------------------------------|-----|-----|-----|
| 21306 | C   | A  | 3547.64                                                                                                                                                             | P<br>A<br>S<br>S |                                                                                                                                                                    |    |     |                                                                                                                     |     | .5  |     |
| 21536 | A   | C  | 31.64                                                                                                                                                               | P<br>A<br>S<br>S | AC=1;AF=0.500;AN=2;BaseQRankSum=-6.740e-01;DP=2;ExcessHet=0.0000;FS=0.000;MLEAC=1;MLEAF=0.500;MQ=60.00;MQRankSum=0.00;QD=15.82;ReadPosRankSum=-6.740e-01;SOR=0.693 | GT | :A  | D: 0 1:1,1<br>:2:39:<br>DP: 0 1:21<br>GQ 536_A<br>:PG _C:39,<br>T:P 0,39:2<br>ID: 1536<br>PL:                       | PS  | BA  | no  |
| 21538 | G   | C  | 31.64                                                                                                                                                               | P<br>A<br>S<br>S | AC=1;AF=0.500;AN=2;BaseQRankSum=-6.740e-01;DP=2;ExcessHet=0.0000;FS=0.000;MLEAC=1;MLEAF=0.500;MQ=60.00;MQRankSum=0.00;QD=15.82;ReadPosRankSum=-6.740e-01;SOR=0.693 | GT | :A  | D: 0 1:1,1<br>:2:39:<br>DP: 0 1:21<br>GQ 536_A<br>:PG _C:39,<br>T:P 0,39:2<br>ID: 1536<br>PL:                       | PS  | BA  | no  |
| 21575 | C   | T  | 49316.06                                                                                                                                                            | P<br>A<br>S<br>S | AC=2;AF=1.00;AN=2;DP=1377;ExcessHet=0.0000;FS=0.000;MLEAC=2;MLEAF=1.00;MQ=60.00;QD=28.20;SOR=0.850                                                                 | GT | :A  | D: 1 1:0,1<br>356:13<br>DP: 56:99:<br>GQ 1 1:21<br>:PG 575_C<br>_T:49<br>T:P 330,40<br>ID: 73,0:2<br>PL: 1575<br>PS | BA  | yes |     |
| 21618 | C   | T  | 174015.1                                                                                                                                                            | P<br>A<br>S<br>S | AC=2;AF=1.00;AN=2;DP=4174;ExcessHet=0.0000;FS=0.000;MLEAC=2;MLEAF=1.00;MQ=60.00;QD=31.45;SOR=0.973                                                                 | GT | :A  | D: 1/1:0,<br>4070:4<br>DP: 073:99<br>:17402                                                                         | PS  | BA  | yes |

|    |     |  |     |   |                                                                      |             |    |    |  |
|----|-----|--|-----|---|----------------------------------------------------------------------|-------------|----|----|--|
| 21 |     |  | 66  | P | AC=1;AF=0.500;AN=2;BaseQRankSum=0.076;DP=328;ExcessHet=0.0000;FS=1.8 | GQ 9,1226   |    |    |  |
| 71 | C T |  | 11  | A | 8;MLEAC=1;MLEAF=0.5                                                  | :PL 7,0     |    |    |  |
| 1  |     |  | 7.6 | S | 00;MQ=60.00;MQRankSum=0.00;QD=21.05;ReadPosRankSum=2.97;SOR=0.742    | GT 0/1:10   |    |    |  |
|    |     |  | 4   | S |                                                                      | :A 16,212   |    |    |  |
|    |     |  |     |   |                                                                      | D: 5:3141   | BA |    |  |
|    |     |  |     |   |                                                                      | DP: :99:66  | .5 | no |  |
|    |     |  |     |   |                                                                      | GQ 125,0,   |    |    |  |
|    |     |  |     |   |                                                                      | :PL 26661   |    |    |  |
|    |     |  |     |   |                                                                      | GT          |    |    |  |
|    |     |  |     |   |                                                                      | :A          |    |    |  |
| 21 |     |  | 78. | P | AC=2;AF=1.00;AN=2;DP=2;ExcessHet=0.0000;FS=0.0                       | D: 1 1:0,2  |    |    |  |
| 90 | T C |  | 32  | A | 00;MLEAC=1;MLEAF=0.5                                                 | DP: :2:6:1  |    |    |  |
| 8  |     |  |     | S | 00;MQ=60.00;QD=28.17;SOR=0.693                                       | GQ 1:2190   | BA |    |  |
|    |     |  |     | S |                                                                      | :PG 8_T_C   | .5 | no |  |
|    |     |  |     |   |                                                                      | T:P :90,6,0 |    |    |  |
|    |     |  |     |   |                                                                      | ID: :21908  |    |    |  |
|    |     |  |     |   |                                                                      | PL:         |    |    |  |
|    |     |  |     |   |                                                                      | PS          |    |    |  |
|    |     |  |     |   |                                                                      | GT          |    |    |  |
|    |     |  |     |   |                                                                      | :A          |    |    |  |
| 21 |     |  | 78. | P | AC=2;AF=1.00;AN=2;DP=2;ExcessHet=0.0000;FS=0.0                       | D: 1 1:0,2  |    |    |  |
| 91 | C T |  | 32  | A | 00;MLEAC=1;MLEAF=0.5                                                 | DP: :2:6:1  |    |    |  |
| 0  |     |  |     | S | 00;MQ=60.00;QD=26.80;SOR=0.693                                       | GQ 1:2190   | BA |    |  |
|    |     |  |     | S |                                                                      | :PG 8_T_C   | .5 | no |  |
|    |     |  |     |   |                                                                      | T:P :90,6,0 |    |    |  |
|    |     |  |     |   |                                                                      | ID: :21908  |    |    |  |
|    |     |  |     |   |                                                                      | PL:         |    |    |  |
|    |     |  |     |   |                                                                      | PS          |    |    |  |
|    |     |  |     |   |                                                                      | GT          |    |    |  |
|    |     |  |     |   |                                                                      | :A          |    |    |  |
| 21 |     |  | 70. | P | AC=1;AF=0.500;AN=2;BaseQRankSum=0.00;DP=4;ExcessHet=0.0000;FS=0.000; | D: 0 1:2,2  |    |    |  |
| 91 | A T |  | 64  | A | MLEAC=1;MLEAF=0.500;                                                 | DP: :4:68:  |    |    |  |
| 3  |     |  |     | S | MQ=60.00;MQRankSum=0.00;QD=17.66;ReadPosRankSum=1.38;SOR=0.693       | GQ 0 1:21   | BA |    |  |
|    |     |  |     | S |                                                                      | :PG 908_T   | .5 | no |  |
|    |     |  |     |   |                                                                      | T:P _C:78,  |    |    |  |
|    |     |  |     |   |                                                                      | ID: 0,68:2  |    |    |  |
|    |     |  |     |   |                                                                      | PL: 1908    |    |    |  |
|    |     |  |     |   |                                                                      | PS          |    |    |  |
|    |     |  |     |   |                                                                      | GT 0 1:2,2  |    |    |  |
|    |     |  |     |   |                                                                      | :A :4:68:   |    |    |  |
| 21 |     |  | 70. | P | AC=1;AF=0.500;AN=2;BaseQRankSum=0.00;DP=4;ExcessHet=0.0000;FS=0.000; | D: 0 1:21   |    |    |  |
| 91 | C A |  | 64  | A | MLEAC=1;MLEAF=0.500;                                                 | DP: 908_T   | BA |    |  |
| 4  |     |  |     | S | MQ=60.00;MQRankSum=0.00;QD=17.66;ReadPosRankSum=1.38;SOR=0.693       | GQ _C:78,   | .5 | no |  |
|    |     |  |     | S |                                                                      | :PG 0,68:2  |    |    |  |
|    |     |  |     |   |                                                                      | T:P 1908    |    |    |  |



| ID:           | PL: | PS                   | GT               | :A                                                                                                                                                             | D:      | DP:    | GQ     | :PL          | BA | yes |
|---------------|-----|----------------------|------------------|----------------------------------------------------------------------------------------------------------------------------------------------------------------|---------|--------|--------|--------------|----|-----|
| 21<br>98<br>7 | G A | 20<br>85<br>44.<br>1 | P<br>A<br>S<br>S | AC=2;AF=1.00;AN=2;DP=5743;ExcessHet=0.0000;FS=0.000;MLEAC=2;MLEAF=1.00;MQ=60.00;MQRankSum=-7.850e-01;QD=27.76;SOR=0.593                                        | 1/1:1,  | 5539:5 | 540:99 | :20855       | .5 | yes |
| 22<br>20<br>0 | T G | 20<br>45<br>88.<br>1 | P<br>A<br>S<br>S | AC=2;AF=1.00;AN=2;BaseQRankSum=4.86;DP=5704;ExcessHet=0.0000;FS=0.000;MLEAC=2;MLEAF=1.00;MQ=60.00;MQRankSum=0.00;QD=29.09;ReadPosRankSum=1.01;SOR=0.592        | 1/1:5,  | 5526:5 | 531:99 | :20460       | .5 | yes |
| 22<br>48<br>0 | C T | 23<br>69<br>6.0<br>6 | P<br>A<br>S<br>S | AC=2;AF=1.00;AN=2;DP=902;ExcessHet=0.0000;FS=0.000;MLEAC=2;MLEAF=1.00;MQ=60.00;QD=27.68;SOR=0.707                                                              | 1/1:0,  | 856:85 | 6:99:2 | 3710,2       | .5 | yes |
| 22<br>57<br>8 | G A | 15<br>67<br>59.<br>1 | P<br>A<br>S<br>S | AC=2;AF=1.00;AN=2;BaseQRankSum=-7.220e-01;DP=4295;ExcessHet=0.0000;FS=0.000;MLEAC=2;MLEAF=1.00;MQ=60.00;MQRankSum=0.024;QD=26.08;ReadPosRankSum=3.94;SOR=0.490 | 1/1:16  | ,4210: | 4226:9 | 9:1567       | .5 | yes |
| 22<br>59<br>9 | G C | 11<br>32<br>6.6<br>4 | P<br>A<br>S<br>S | AC=1;AF=0.500;AN=2;BaseQRankSum=1.56;DP=922;ExcessHet=0.0000;FS=0.000;MLEAC=1;MLEAF=0.500;MQ=60.00;MQRankSum=0.00;QD=12.73;ReadPosRankSum=-1.241e+00;SOR=0.696 | 0/1:38  | 6,504: | 890:99 | :11334       | .5 | yes |
| 22<br>67<br>4 | C T | 15<br>59<br>55.<br>1 | P<br>A<br>S<br>S | AC=2;AF=1.00;AN=2;BaseQRankSum=-6.360e-01;DP=3682;ExcessHet=0.0000;FS=0.000;MLEAC=2;MLEAF=1.00;MQ=60.00;MQRankSum=0.00;QD=33.85;ReadPosRankSum=1.70;SOR=0.318  | 1 1:1,3 | 497:34 | 98:99: | 1 1:22       | .5 | yes |
|               |     |                      |                  |                                                                                                                                                                |         |        |        | :PG<br>_T:15 |    |     |
|               |     |                      |                  |                                                                                                                                                                |         |        |        | T:P<br>ID:   |    |     |

|               |        |                      |                  |                                                                                                                                                              |                                                                                                                                                        |          |     |
|---------------|--------|----------------------|------------------|--------------------------------------------------------------------------------------------------------------------------------------------------------------|--------------------------------------------------------------------------------------------------------------------------------------------------------|----------|-----|
| 22<br>67<br>9 | T<br>C | 15<br>23<br>84.<br>1 | P<br>A<br>S<br>S | AC=2;AF=1.00;AN=2;DP=3393;ExcessHet=0.0000;FS=0.000;MLEAC=2;MLEAF=1.00;MQ=60.00;QD=27.08;SOR=0.891                                                           | PL: 0484,0<br>PS :22674<br>GT 1 1:0,3<br>:A 393:33<br>D: 93:99:<br>DP: 1 1:22<br>GQ 674_C<br>:PG _T:15<br>T:P 2398,1<br>ID: 0213,0<br>PL: :22674<br>PS | BA<br>.5 | yes |
| 22<br>68<br>3 | T<br>A | 30<br>5.6<br>4       | P<br>A<br>S<br>S | AC=1;AF=0.500;AN=2;BaseQRankSum=-6.730e-01;DP=69;ExcessHet=0.0000;FS=1.061;MLEAC=1;MLEAF=0.500;MQ=60.00;MQRankSum=0.00;QD=4.43;ReadPosRankSum=2.60;SOR=0.532 | GT 0/1:51<br>:A ,18:69<br>D: :99:31<br>DP: 3,0,13<br>GQ 55<br>:PL                                                                                      | BA<br>.5 | no  |
| 22<br>68<br>6 | C<br>T | 14<br>65<br>18.<br>1 | P<br>A<br>S<br>S | AC=2;AF=1.00;AN=2;BaseQRankSum=1.61;DP=3260;ExcessHet=0.0000;FS=0.000;MLEAC=2;MLEAF=1.00;MQ=60.00;MQRankSum=0.00;QD=25.42;ReadPosRankSum=1.35;SOR=0.162      | GT 1 1:2,3<br>:A 258:32<br>D: 60:99:<br>DP: 1 1:22<br>GQ 674_C<br>:PG _T:14<br>T:P 6532,9<br>ID: 756,0:<br>PL: 22674<br>PS                             | BA<br>.5 | yes |
| 22<br>68<br>8 | A<br>G | 14<br>29<br>16.<br>1 | P<br>A<br>S<br>S | AC=2;AF=1.00;AN=2;BaseQRankSum=2.06;DP=3194;ExcessHet=0.0000;FS=0.000;MLEAC=2;MLEAF=1.00;MQ=60.00;MQRankSum=0.00;QD=27.65;ReadPosRankSum=1.93;SOR=0.176      | GT 1/1:2,<br>:A 3128:3<br>D: 134:99<br>DP: :14293<br>GQ 0,9518<br>:PL ,0                                                                               | BA<br>.5 | yes |
| 22<br>77<br>5 | G<br>A | 10<br>94<br>33.<br>1 | P<br>A<br>S<br>S | AC=2;AF=1.00;AN=2;BaseQRankSum=1.09;DP=3179;ExcessHet=0.0000;FS=0.000;MLEAC=2;MLEAF=1.00;MQ=60.00;MQRankSum=0.00;QD=27.08;ReadPosRankSum=2.08;SOR=0.456      | GT 1/1:26<br>:A ,2987:<br>D: 3013:9<br>DP: 9:1094<br>GQ 47,824<br>:PL 5,0                                                                              | BA<br>.5 | yes |

|    |     |     |   |                                                                  |     |         |    |  |     |
|----|-----|-----|---|------------------------------------------------------------------|-----|---------|----|--|-----|
| 22 |     | 17  | P | AC=1;AF=0.500;AN=2;BaseQRankSum=7.25;DP=2222                     | GT  | 0/1:14  |    |  |     |
| 77 | A G | 80  | A | ;ExcessHet=0.0000;FS=1.85                                        | :A  | 15,698  |    |  |     |
| 6  |     | 5.6 | S | 3;MLEAC=1;MLEAF=0.50                                             | D:  | :2126:  | BA |  | no  |
|    |     | 4   | S | 0;MQ=60.00;MQRankSum=0.00;QD=8.43;ReadPosRankSum=10.34;SOR=0.852 | DP: | 99:178  | .5 |  |     |
|    |     |     |   |                                                                  | GQ  | 13,0,3  |    |  |     |
|    |     |     |   |                                                                  | :PL | 9342    |    |  |     |
| 22 |     | 13  | P | AC=2;AF=1.00;AN=2;BaseQRankSum=2.83;DP=3063;                     | GT  | 1/1:2,  |    |  |     |
| 78 | A C | 01  | A | ExcessHet=0.0000;FS=0.00                                         | :A  | 2995:2  |    |  |     |
| 6  |     | 33. | S | 0;MLEAC=2;MLEAF=1.00;                                            | D:  | 997:99  | BA |  | yes |
|    |     | 1   | S | MQ=60.00;MQRankSum=0.00;QD=25.42;ReadPosRankSum=0.012;SOR=0.108  | DP: | :13014  | .5 |  |     |
|    |     |     |   |                                                                  | GQ  | 7,8987  |    |  |     |
|    |     |     |   |                                                                  | :PL | ,0      |    |  |     |
| 22 |     | 15  | P | AC=2;AF=1.00;AN=2;DP=                                            | GT  | 1/1:0,  |    |  |     |
| 81 | G T | 62  | A | 3544;ExcessHet=0.0000;FS                                         | :A  | 3530:3  |    |  |     |
| 3  |     | 91. | S | =0.000;MLEAC=2;MLEAF                                             | D:  | 530:99  | BA |  | yes |
|    |     | 1   | S | =1.00;MQ=60.00;QD=27.65                                          | DP: | :15630  | .5 |  |     |
|    |     |     |   | ;SOR=0.739                                                       | GQ  | 5,1062  |    |  |     |
|    |     |     |   |                                                                  | :PL | 0,0     |    |  |     |
| 22 |     | 18  | P | AC=2;AF=1.00;AN=2;DP=                                            | GT  | 1/1:0,  |    |  |     |
| 88 | T G | 48  | A | 4220;ExcessHet=0.0000;FS                                         | :A  | 4205:4  |    |  |     |
| 2  |     | 91. | S | =0.000;MLEAC=2;MLEAF                                             | D:  | 205:99  | BA |  | yes |
|    |     | 1   | S | =1.00;MQ=60.00;QD=29.48                                          | DP: | :18490  | .5 |  |     |
|    |     |     |   | ;SOR=0.833                                                       | GQ  | 5,1265  |    |  |     |
|    |     |     |   |                                                                  | :PL | 2,0     |    |  |     |
| 22 |     | 18  | P | AC=2;AF=1.00;AN=2;BaseQRankSum=2.99;DP=4634;                     | GT  | 1/1:2,  |    |  |     |
| 91 | T G | 86  | A | ExcessHet=0.0000;FS=0.00                                         | :A  | 4052:4  |    |  |     |
| 7  |     | 41. | S | 0;MLEAC=2;MLEAF=1.00;                                            | D:  | 102:99  | BA |  | yes |
|    |     | 1   | S | MQ=60.00;MQRankSum=2.000e-                                       | DP: | :18865  | .5 |  |     |
|    |     |     |   | 03;QD=30.56;ReadPosRankSum=1.50;SOR=0.140                        | GQ  | 5,1356  |    |  |     |
|    |     |     |   |                                                                  | :PL | 8,0     |    |  |     |
| 22 |     | 50  | P | AC=2;AF=1.00;AN=2;DP=                                            | GT  |         |    |  |     |
| 97 | G C | 6.0 | A | 13;ExcessHet=0.0000;FS=0.                                        | :A  | 1 1:0,1 |    |  |     |
| 3  |     | 6   | S | 000;MLEAC=2;MLEAF=1.                                             | D:  | 3:13:3  |    |  |     |
|    |     |     | S | 00;MQ=60.00;QD=30.62;SOR=0.836                                   | DP: | 9:1 1:2 |    |  |     |
|    |     |     |   |                                                                  | GQ  | 2973_   | BA |  | no  |
|    |     |     |   |                                                                  | :PG | G_C:5   | .5 |  |     |
|    |     |     |   |                                                                  | T:P | 20,39,  |    |  |     |
|    |     |     |   |                                                                  | ID: | 0:2297  |    |  |     |
|    |     |     |   |                                                                  | PL: | 3       |    |  |     |
|    |     |     |   |                                                                  | PS  |         |    |  |     |

|    |     |     |   |                                             |                         |    |     |
|----|-----|-----|---|---------------------------------------------|-------------------------|----|-----|
| 22 |     | 15  | P | AC=2;AF=1.00;AN=2;Base<br>QRankSum=-5.170e- | GT 1/1:1,<br>:A 3570:3  |    |     |
| 99 | G A | 25  | A | 01;DP=4218;ExcessHet=0.0                    | :D: 575:99              | BA | yes |
| 2  |     | 22. | S | MLEAF=1.00;MQ=60.00;M                       | DP: :15253              | .5 |     |
|    |     | 1   | S | QRankSum=0.00;QD=33.63                      | GQ 6,1078               |    |     |
|    |     |     |   | ;ReadPosRankSum=-                           | :PL 0,0                 |    |     |
|    |     |     |   | 3.970e-01;SOR=0.415                         |                         |    |     |
| 22 |     | 14  | P | AC=2;AF=1.00;AN=2;DP=                       | GT 1/1:0,<br>:A 2901:2  |    |     |
| 99 | C A | 88  | A | 3322;ExcessHet=0.0000;FS                    | D: 902:99               | BA | yes |
| 5  |     | 79. | S | =0.000;MLEAC=2;MLEAF                        | DP: :14889              | .5 |     |
|    |     | 1   | S | =1.00;MQ=60.00;QD=29.52                     | GQ 3,9997               |    |     |
|    |     |     |   | ;SOR=1.078                                  | :PL ,0                  |    |     |
| 23 |     | 15  | P | AC=2;AF=1.00;AN=2;Base                      | GT 1/1:15               |    |     |
| 01 | A C | 36  | A | QRankSum=-                                  | :A ,3455:               |    |     |
| 3  |     | 24. | S | 1.794e+00;DP=3475;Excess                    | D: 3470:9               | BA | yes |
|    |     | 1   | S | Het=0.0000;FS=0.000;MLE                     | DP: 9:1536              | .5 |     |
|    |     |     |   | AC=2;MLEAF=1.00;MQ=6                        | GQ 38,100               |    |     |
|    |     |     |   | 0.00;MQRankSum=0.00;QD                      | :PL 93,0                |    |     |
|    |     |     |   | =32.62;ReadPosRankSum=0                     |                         |    |     |
|    |     |     |   | .934;SOR=0.509                              |                         |    |     |
| 23 |     | 13  | P | AC=2;AF=1.00;AN=2;DP=                       | GT 1/1:0,<br>:A 3028:3  |    |     |
| 01 | T G | 28  | A | 3256;ExcessHet=0.0000;FS                    | D: 028:99               | BA | yes |
| 8  |     | 47. | S | =0.000;MLEAC=2;MLEAF                        | DP: :13286              | .5 |     |
|    |     | 1   | S | =1.00;MQ=60.00;QD=29.33                     | GQ 1,9192               |    |     |
|    |     |     |   | ;SOR=1.011                                  | :PL ,0                  |    |     |
| 23 |     | 11  | P | AC=2;AF=1.00;AN=2;Base                      | GT 1 1:32,<br>:A 2523:2 |    |     |
| 05 | A G | 20  | A | QRankSum=-                                  | D: 555:99               |    |     |
| 5  |     | 12. | S | 2.387e+00;DP=2556;Excess                    | DP: :1 1:23             | BA | yes |
|    |     | 1   | S | Het=0.0000;FS=0.000;MLE                     | GQ 055_A                | .5 |     |
|    |     |     |   | AC=2;MLEAF=1.00;MQ=6                        | :PG _G:11               |    |     |
|    |     |     |   | 0.00;MQRankSum=0.00;QD                      | T:P 2026,6              |    |     |
|    |     |     |   | =35.36;ReadPosRankSum=-                     | ID: 306,0:              |    |     |
|    |     |     |   | 1.310e-01;SOR=0.025                         | PL: 23055               |    |     |
|    |     |     |   |                                             | PS                      |    |     |
| 23 |     | 10  | P | AC=2;AF=1.00;AN=2;Base                      | GT 1 1:31,<br>:A 2434:2 |    |     |
| 06 | A T | 75  | A | QRankSum=-                                  | D: 465:99               | BA | yes |
| 3  |     | 11. | S | 3.064e+00;DP=2465;Excess                    | DP: :1 1:23             | .5 |     |
|    |     | 1   | S | Het=0.0000;FS=0.000;MLE                     | GQ 055_A                |    |     |
|    |     |     |   | AC=2;MLEAF=1.00;MQ=6                        | :PG _G:10               |    |     |
|    |     |     |   | 0.00;MQRankSum=0.00;QD                      | T:P 7525,6              |    |     |
|    |     |     |   | =34.30;ReadPosRankSum=-                     | ID:                     |    |     |
|    |     |     |   | 6.910e-01;SOR=0.276                         |                         |    |     |

|    |   |   |     |   |                           |             |    |     |
|----|---|---|-----|---|---------------------------|-------------|----|-----|
| 23 |   |   | 10  | P | AC=2;AF=1.00;AN=2;Base    | PL: 033,0:  |    |     |
| 07 | T | C | 35  | A | QRankSum=-8.300e-         | PS 23055    |    |     |
| 5  |   |   | 40. | S | 01;DP=2451;ExcessHet=0.0  | GT 1 1:3,2  |    |     |
|    |   |   | 1   | S | 000;FS=0.000;MLEAC=2;     | :A 346:23   |    |     |
|    |   |   |     | S | MLEAF=1.00;MQ=60.00;M     | D: 49:99:   |    |     |
|    |   |   |     | S | QRankSum=0.00;QD=27.00    | DP: 1 1:23  | BA | yes |
|    |   |   |     | S | ;ReadPosRankSum=0.629;S   | GQ 055_A    | .5 |     |
|    |   |   |     | S | OR=0.102                  | :PG _G:10   |    |     |
|    |   |   |     | S |                           | T:P 3554,7  |    |     |
|    |   |   |     | S |                           | ID: 078,0:  |    |     |
|    |   |   |     | S |                           | PL: 23055   |    |     |
|    |   |   |     | S |                           | PS          |    |     |
| 23 |   |   | 86. | P | AC=1;AF=0.500;AN=2;Bas    | GT          |    |     |
| 08 | T | C | 64  | A | eQRankSum=1.82;DP=42;E    | :A 0/1:35   |    |     |
| 4  |   |   |     | S | xcessHet=0.0000;FS=0.000; | D: ,6:41:   | BA | no  |
|    |   |   |     | S | MLEAC=1;MLEAF=0.500;      | DP: 94:94,  | .5 |     |
|    |   |   |     | S | MQ=60.00;MQRankSum=0.     | GQ 0,912    |    |     |
|    |   |   |     | S | 00;QD=2.11;ReadPosRankS   | :PL         |    |     |
|    |   |   |     | S | um=0.742;SOR=0.641        |             |    |     |
| 23 |   |   | 37. | P | AC=2;AF=1.00;AN=2;DP=     | GT          |    |     |
| 15 | A | G | 32  | A | 2;ExcessHet=0.0000;FS=0.0 | :A 1/1:0,   |    |     |
| 6  |   |   |     | S | 00;MLEAC=1;MLEAF=0.5      | D: 2:2:6:   | BA | no  |
|    |   |   |     | S | 00;MQ=60.00;QD=18.66;S    | DP: 49,6,0  | .5 |     |
|    |   |   |     | S | OR=0.693                  | GQ          |    |     |
|    |   |   |     | S |                           | :PL         |    |     |
| 23 |   |   | 62  | P | AC=2;AF=1.00;AN=2;DP=     | GT 1/1:0,   |    |     |
| 19 | C | T | 59  | A | 2120;ExcessHet=0.0000;FS  | :A 2066:2   |    |     |
| 1  |   |   | 3.0 | S | =0.000;MLEAC=2;MLEAF      | D: 074:99   | BA | yes |
|    |   |   | 6   | S | =1.00;MQ=60.00;QD=30.30   | DP: :62607  | .5 |     |
|    |   |   |     | S | ;SOR=0.784                | GQ ,6198,   |    |     |
|    |   |   |     | S |                           | :PL 0       |    |     |
| 23 |   |   | 22  | P | AC=2;AF=1.00;AN=2;DP=     | GT          |    |     |
| 27 | G | T | 6.0 | A | 9;ExcessHet=0.0000;FS=0.0 | :A 1/1:0,   |    |     |
| 0  |   |   | 5   | S | 00;MLEAC=2;MLEAF=1.0      | D: 9:9:27   | BA | yes |
|    |   |   |     | S | 0;MQ=60.00;QD=25.12;SO    | DP: :240,2  | .5 |     |
|    |   |   |     | S | R=0.892                   | GQ 7,0      |    |     |
|    |   |   |     | S |                           | :PL         |    |     |
| 23 |   |   | 43. | P | AC=1;AF=0.500;AN=2;Bas    | GT          |    |     |
| 31 | C | T | 64  | A | eQRankSum=1.92;DP=15;E    | :A 0/1:9,   |    |     |
| 5  |   |   |     | S | xcessHet=0.0000;FS=3.424; | D: 2:11:5   | BA | no  |
|    |   |   |     | S | MLEAC=1;MLEAF=0.500;      | DP: 1:51,0, | .5 |     |
|    |   |   |     | S | MQ=60.00;MQRankSum=0.     | GQ 206      |    |     |
|    |   |   |     | S | 00;QD=3.97;ReadPosRankS   | :PL         |    |     |
|    |   |   |     | S | um=1.10;SOR=2.272         |             |    |     |

|               |        |                      |                  |                                                                                                                                                                     |                                                                                                                             |          |     |
|---------------|--------|----------------------|------------------|---------------------------------------------------------------------------------------------------------------------------------------------------------------------|-----------------------------------------------------------------------------------------------------------------------------|----------|-----|
| 23<br>40<br>3 | A<br>G | 22<br>59<br>95.<br>1 | P<br>A<br>S<br>S | AC=2;AF=1.00;AN=2;DP=5929;ExcessHet=0.0000;FS=0.000;MLEAC=2;MLEAF=1.00;MQ=60.00;QD=29.48;SOR=0.828                                                                  | GT 1/1:0,<br>:A 5754:5<br>D: 754:99<br>DP: :22600<br>GQ 9,1730<br>:PL 5,0                                                   | BA<br>.5 | yes |
| 23<br>52<br>0 | C<br>T | 12<br>37<br>29.<br>1 | P<br>A<br>S<br>S | AC=2;AF=1.00;AN=2;BaseQRankSum=2.44;DP=3657;ExcessHet=0.0000;FS=0.000;MLEAC=2;MLEAF=1.00;MQ=60.00;MQRankSum=0.00;QD=34.96;ReadPosRankSum=1.34;SOR=0.702             | GT 1/1:18<br>:A ,3521:<br>D: 3539:9<br>DP: 9:1237<br>GQ 43,100<br>:PL 93,0                                                  | BA<br>.5 | no  |
| 23<br>52<br>5 | C<br>T | 21<br>94<br>52.<br>1 | P<br>A<br>S<br>S | AC=2;AF=1.00;AN=2;BaseQRankSum=-4.170e-01;DP=5794;ExcessHet=0.0000;FS=0.000;MLEAC=2;MLEAF=1.00;MQ=60.00;MQRankSum=0.00;QD=30.56;ReadPosRankSum=1.26;SOR=0.474       | GT 1/1:1,<br>:A 3904:3<br>D: 911:99<br>DP: :21946<br>GQ 6,1689<br>:PL 3,0                                                   | BA<br>.5 | yes |
| 23<br>59<br>9 | T<br>G | 22<br>13<br>46.<br>1 | P<br>A<br>S<br>S | AC=2;AF=1.00;AN=2;DP=4975;ExcessHet=0.0000;FS=0.000;MLEAC=2;MLEAF=1.00;MQ=60.00;QD=35.92;SOR=1.243                                                                  | GT 1 1:0,4<br>:A 957:49<br>D: 57:99:<br>DP: 1 1:23<br>GQ 525_C<br>:PG _T:22<br>T:P 1360,1<br>ID: 4921,0<br>PL: :23525<br>PS | BA<br>.5 | yes |
| 23<br>60<br>4 | C<br>A | 21<br>40<br>33.<br>1 | P<br>A<br>S<br>S | AC=2;AF=1.00;AN=2;DP=4865;ExcessHet=0.0000;FS=0.000;MLEAC=2;MLEAF=1.00;MQ=60.00;QD=29.63;SOR=1.232                                                                  | GT 1/1:0,<br>:A 4742:4<br>D: 743:99<br>DP: :21404<br>GQ 7,1443<br>:PL 5,0                                                   | BA<br>.5 | yes |
| 23<br>85<br>4 | C<br>A | 12<br>49<br>08.<br>1 | P<br>A<br>S<br>S | AC=2;AF=1.00;AN=2;BaseQRankSum=-1.835e+00;DP=3997;ExcessHet=0.0000;FS=0.000;MLEAC=2;MLEAF=1.00;MQ=60.00;MQRankSum=0.00;QD=33.93;ReadPosRankSum=-9.450e-01;SOR=0.563 | GT 1/1:43<br>:A ,3638:<br>D: 3700:9<br>DP: 9:1249<br>GQ 22,949<br>:PL 2,0                                                   | BA<br>.5 | yes |

|    |   |     |   |                           |     |         |    |  |     |
|----|---|-----|---|---------------------------|-----|---------|----|--|-----|
| 23 |   | 45  | P | AC=2;AF=1.00;AN=2;Base    | GT  | 1/1:8,  |    |  |     |
| 93 | A | 80  | A | QRankSum=0.799;DP=1571    | :A  | 1430:1  |    |  |     |
| 3  | C | 4.0 | S | ;ExcessHet=0.0000;FS=0.00 | D:  | 438:99  | BA |  | no  |
|    |   | 6   | S | 0;MLEAC=2;MLEAF=1.00;     | DP: | :45818  | .5 |  |     |
|    |   |     |   | MQ=60.00;MQRankSum=0.     | GQ  | ,4082,  |    |  |     |
|    |   |     |   | 00;QD=31.85;ReadPosRank   | :PL | 0       |    |  |     |
|    |   |     |   | Sum=0.854;SOR=0.413       |     |         |    |  |     |
| 23 |   | 13  | P | AC=2;AF=1.00;AN=2;Base    | GT  | 1/1:2,  |    |  |     |
| 94 | G | 27  | A | QRankSum=2.93;DP=3837;    | :A  | 3680:3  |    |  |     |
| 8  | T | 67. | S | ExcessHet=0.0000;FS=0.00  | D:  | 692:99  | BA |  | yes |
|    |   | 1   | S | 0;MLEAC=2;MLEAF=1.00;     | DP: | :13278  | .5 |  |     |
|    |   |     |   | MQ=60.00;MQRankSum=0.     | GQ  | 1,1104  |    |  |     |
|    |   |     |   | 00;QD=28.76;ReadPosRank   | :PL | 1,0     |    |  |     |
|    |   |     |   | Sum=-                     |     |         |    |  |     |
|    |   |     |   | 2.023e+00;SOR=0.733       |     |         |    |  |     |
| 23 |   |     | P | AC=2;AF=1.00;AN=2;DP=     | GT  |         |    |  |     |
| 95 | T | 35. | A | 1;ExcessHet=0.0000;FS=0.0 | :A  | 1 1:0,1 |    |  |     |
| 9  | C | 48  | S | 00;MLEAC=1;MLEAF=0.5      | D:  | :1:3:1  |    |  |     |
|    |   |     | S | 00;MQ=60.00;QD=31.26;S    | DP: | 1:2395  |    |  |     |
|    |   |     |   | OR=1.609                  | GQ  | 7_G_    | BA |  | no  |
|    |   |     |   |                           | :PG | GA:45   | .5 |  |     |
|    |   |     |   |                           | T:P | ,3,0:23 |    |  |     |
|    |   |     |   |                           | ID: | 957     |    |  |     |
|    |   |     |   |                           | PL: |         |    |  |     |
|    |   |     |   |                           | PS  |         |    |  |     |
| 23 |   |     | P | AC=2;AF=1.00;AN=2;DP=     | GT  |         |    |  |     |
| 96 | T | 35. | A | 1;ExcessHet=0.0000;FS=0.0 | :A  | 1 1:0,1 |    |  |     |
| 0  | C | 48  | S | 00;MLEAC=1;MLEAF=0.5      | D:  | :1:3:1  |    |  |     |
|    |   |     | S | 00;MQ=60.00;QD=27.76;S    | DP: | 1:2395  |    |  |     |
|    |   |     |   | OR=1.609                  | GQ  | 7_G_    | BA |  | no  |
|    |   |     |   |                           | :PG | GA:45   | .5 |  |     |
|    |   |     |   |                           | T:P | ,3,0:23 |    |  |     |
|    |   |     |   |                           | ID: | 957     |    |  |     |
|    |   |     |   |                           | PL: |         |    |  |     |
|    |   |     |   |                           | PS  |         |    |  |     |
| 23 |   |     | P | AC=2;AF=1.00;AN=2;DP=     | GT  |         |    |  |     |
| 96 | T | 35. | A | 1;ExcessHet=0.0000;FS=0.0 | :A  | 1 1:0,1 |    |  |     |
| 1  | C | 48  | S | 00;MLEAC=1;MLEAF=0.5      | D:  | :1:3:1  |    |  |     |
|    |   |     | S | 00;MQ=60.00;QD=29.09;S    | DP: | 1:2395  |    |  |     |
|    |   |     |   | OR=1.609                  | GQ  | 7_G_    | BA |  | no  |
|    |   |     |   |                           | :PG | GA:45   | .5 |  |     |
|    |   |     |   |                           | T:P | ,3,0:23 |    |  |     |
|    |   |     |   |                           | ID: | 957     |    |  |     |
|    |   |     |   |                           | PL: |         |    |  |     |
|    |   |     |   |                           | PS  |         |    |  |     |

|    |   |     |   |                           |     |         |    |     |
|----|---|-----|---|---------------------------|-----|---------|----|-----|
| 24 |   | 17  | P | AC=2;AF=1.00;AN=2;DP=     | GT  |         |    |     |
| 21 | C | 6.0 | A | 7;ExcessHet=0.0000;FS=0.0 | :A  | 1/1:0,  |    |     |
| 0  | T | 2   | S | 00;MLEAC=2;MLEAF=1.0      | D:  | 7:7:21  | BA | yes |
|    |   |     | S | 0;MQ=60.00;QD=25.15;SO    | DP: | :190,2  | .5 |     |
|    |   |     |   | R=0.941                   | GQ  | 1,0     |    |     |
|    |   |     |   |                           | :PL |         |    |     |
| 24 |   | 23  | P | AC=2;AF=1.00;AN=2;DP=     | GT  | 1/1:0,  |    |     |
| 42 | A | 28  | A | 5665;ExcessHet=0.0000;FS  | :A  | 5508:5  |    |     |
| 4  | T | 54. | S | =0.000;MLEAC=2;MLEAF      | D:  | 513:99  | BA | yes |
|    |   | 1   | S | =1.00;MQ=60.00;QD=32.62   | DP: | :23286  | .5 |     |
|    |   |     |   | ;SOR=0.841                | GQ  | 8,1656  |    |     |
|    |   |     |   |                           | :PL | 4,0     |    |     |
| 24 |   | 90  | P | AC=2;AF=1.00;AN=2;Base    | GT  | 1 1:3,2 |    |     |
| 44 | C | 93  | A | QRankSum=-9.650e-         | :A  | 048:20  |    |     |
| 2  | T | 2.0 | S | 01;DP=2173;ExcessHet=0.0  | D:  | 51:99:  |    |     |
|    |   | 6   | S | 000;FS=0.000;MLEAC=2;     | DP: | 1 1:24  | BA | no  |
|    |   |     |   | MLEAF=1.00;MQ=60.00;M     | GQ  | 424_A   | .5 |     |
|    |   |     |   | QRankSum=0.00;QD=32.91    | :PG | _T:90   |    |     |
|    |   |     |   | ;ReadPosRankSum=1.69;SO   | T:P | 946,61  |    |     |
|    |   |     |   | R=0.403                   | ID: | 38,0:2  |    |     |
|    |   |     |   |                           | PL: | 4424    |    |     |
|    |   |     |   |                           | PS  |         |    |     |
| 24 |   | 23  | P | AC=2;AF=1.00;AN=2;Base    | GT  | 1/1:2,  |    |     |
| 46 | T | 08  | A | QRankSum=-5.040e-         | :A  | 5441:5  |    |     |
| 9  | A | 51. | S | 01;DP=5510;ExcessHet=0.0  | D:  | 446:99  | BA | yes |
|    |   | 1   | S | 000;FS=0.000;MLEAC=2;     | DP: | :23086  | .5 |     |
|    |   |     |   | MLEAF=1.00;MQ=60.00;M     | GQ  | 5,1632  |    |     |
|    |   |     |   | QRankSum=0.532;QD=29.3    | :PL | 1,0     |    |     |
|    |   |     |   | 3;ReadPosRankSum=1.01;S   |     |         |    |     |
|    |   |     |   | OR=0.149                  |     |         |    |     |
| 24 |   | 32. | P | AC=1;AF=0.500;AN=2;Bas    | GT  |         |    |     |
| 51 | G | 64  | A | eQRankSum=-9.670e-        | :A  | 0/1:1,  |    |     |
| 5  | A |     | S | 01;DP=3;ExcessHet=0.0000  | D:  | 2:3:33  | BA | no  |
|    |   |     | S | ;FS=0.000;MLEAC=1;MLE     | DP: | :40,0,3 | .5 |     |
|    |   |     |   | AF=0.500;MQ=60.00;MQR     | GQ  | 3       |    |     |
|    |   |     |   | ankSum=0.00;QD=10.88;Re   | :PL |         |    |     |
|    |   |     |   | adPosRankSum=-9.670e-     |     |         |    |     |
|    |   |     |   | 01;SOR=0.223              |     |         |    |     |
| 24 |   | 37. | P | AC=2;AF=1.00;AN=2;DP=     | GT  |         |    |     |
| 58 | T | 32  | A | 2;ExcessHet=0.0000;FS=0.0 | :A  | 1/1:0,  |    |     |
| 9  | C |     | S | 00;MLEAC=1;MLEAF=0.5      | D:  | 2:2:6:  | BA | no  |
|    |   |     | S | 00;MQ=60.00;QD=18.66;S    | DP: | 49,6,0  | .5 |     |
|    |   |     |   | OR=0.693                  | GQ  |         |    |     |
|    |   |     |   |                           | :PL |         |    |     |



|       |     |          |       |                  |                                                                                                                                                                 |                                                                                                               |          |     |
|-------|-----|----------|-------|------------------|-----------------------------------------------------------------------------------------------------------------------------------------------------------------|---------------------------------------------------------------------------------------------------------------|----------|-----|
| 24998 | G T | 257      | 5.9   | P<br>A<br>S<br>S | AC=2;AF=1.00;AN=2;DP=6;ExcessHet=0.0000;FS=0.000;MLEAC=2;MLEAF=1.00;MQ=60.00;QD=26.61;SOR=0.693                                                                 | GT<br>:A 1 1:0,6<br>D: :6:18:<br>DP: 1 1:24<br>GQ 998_G<br>:PG _T:27<br>T:P 0,18,0:<br>ID: 24998<br>PL:<br>PS | BA<br>.5 | no  |
| 25000 | C T | 199600.1 | 85.14 | P<br>A<br>S<br>S | AC=2;AF=1.00;AN=2;BaseQRankSum=2.27;DP=5372;ExcessHet=0.0000;FS=0.000;MLEAC=2;MLEAF=1.00;MQ=60.00;MQRankSum=-3.850e-01;QD=35.36;ReadPosRankSum=2.14;SOR=0.566   | GT 1/1:3,<br>:A 5221:5<br>D: 224:99<br>DP: :19961<br>GQ 4,1561<br>:PL 2,0                                     | BA<br>.5 | yes |
| 25169 | C T | 85.14    | 85.14 | P<br>A<br>S<br>S | AC=2;AF=1.00;AN=2;DP=6;ExcessHet=0.0000;FS=0.000;MLEAC=2;MLEAF=1.00;MQ=60.00;QD=21.29;SOR=0.693                                                                 | GT<br>:A 1/1:0,<br>D: 4:4:12<br>DP: :99,12,<br>GQ 0<br>:PL                                                    | BA<br>.5 | no  |
| 25290 | G T | 5239.64  | 39.64 | P<br>A<br>S<br>S | AC=1;AF=0.500;AN=2;BaseQRankSum=2.11;DP=582;ExcessHet=0.0000;FS=1.101;MLEAC=1;MLEAF=0.500;MQ=60.00;MQRankSum=0.00;QD=9.70;ReadPosRankSum=4.14;SOR=0.753         | GT<br>:A 0/1:29<br>D: 6,244:<br>DP: 540:99<br>GQ :5247,<br>:PL 0,6368                                         | BA<br>.5 | yes |
| 25350 | C T | 34499.06 | 9.06  | P<br>A<br>S<br>S | AC=2;AF=1.00;AN=2;BaseQRankSum=-1.949e+00;DP=1286;ExcessHet=0.0000;FS=0.000;MLEAC=2;MLEAF=1.00;MQ=60.00;MQRankSum=0.00;QD=-28.42;ReadPosRankSum=0.074;SOR=0.236 | GT 1/1:1,<br>:A 1213:1<br>D: 214:99<br>DP: :34513<br>GQ ,3596,<br>:PL 0                                       | BA<br>.5 | no  |
| 25584 | C T | 214267.1 | 67.1  | P<br>A<br>S<br>S | AC=2;AF=1.00;AN=2;BaseQRankSum=1.31;DP=5821;ExcessHet=0.0000;FS=0.000;MLEAC=2;MLEAF=1.00;MQ=60.00;MQRankSum=0.00;QD=34.30;ReadPosRankSum=0.542;SOR=0.652        | GT 1/1:3,<br>:A 5623:5<br>D: 627:99<br>DP: :21428<br>GQ 1,1684<br>:PL 6,0                                     | BA<br>.5 | yes |

|               |     |                      |                  |                                                                                                                                                                    |                                                                                                                                                                      |                                                                    |          |     |
|---------------|-----|----------------------|------------------|--------------------------------------------------------------------------------------------------------------------------------------------------------------------|----------------------------------------------------------------------------------------------------------------------------------------------------------------------|--------------------------------------------------------------------|----------|-----|
| 26<br>02<br>2 | C T | 37.<br>32            | P<br>A<br>S<br>S | AC=2;AF=1.00;AN=2;DP=2;ExcessHet=0.0000;FS=0.00;MLEAC=1;MLEAF=0.500;MQ=60.00;QD=18.66;SOR=0.693                                                                    | GT<br>:A<br>D:<br>DP:<br>GQ<br>:PL<br>GT<br>:A<br>D:<br>DP:<br>GQ<br>:PG<br>T:P<br>ID:<br>PL:<br>PS<br>GT<br>:A<br>D:<br>DP:<br>GQ<br>:PG<br>T:P<br>ID:<br>PL:<br>PS | 1/1:0,<br>2:2:6:<br>49,6,0                                         | BA<br>.5 | yes |
| 26<br>04<br>2 | C T | 52.<br>64            | P<br>A<br>S<br>S | AC=1;AF=0.500;AN=2;BaseQRankSum=-2.530e-01;DP=10;ExcessHet=0.0000;FS=3.310;MLEAC=1;MLEAF=0.500;MQ=60.00;MQRankSum=0.00;QD=5.26;ReadPosRankSum=0.00;SOR=2.303       | :A<br>D:<br>DP:<br>GQ<br>:PG<br>T:P<br>ID:<br>PL:<br>PS<br>GT<br>:A<br>D:<br>DP:<br>GQ<br>:PG<br>T:P<br>ID:<br>PL:<br>PS                                             | 0 1:8,2<br>:10:60<br>:0 1:26<br>042_C<br>_T:60,<br>0,330:<br>26042 | BA<br>.5 | no  |
| 26<br>04<br>4 | C G | 52.<br>64            | P<br>A<br>S<br>S | AC=1;AF=0.500;AN=2;BaseQRankSum=-1.348e+00;DP=10;ExcessHet=0.0000;FS=3.310;MLEAC=1;MLEAF=0.500;MQ=60.00;MQRankSum=0.00;QD=5.26;ReadPosRankSum=0.00;SOR=2.303       | :A<br>D:<br>DP:<br>GQ<br>:PG<br>T:P<br>ID:<br>PL:<br>PS                                                                                                              | 0 1:8,2<br>:10:60<br>:0 1:26<br>042_C<br>_T:60,<br>0,330:<br>26042 | BA<br>.5 | no  |
| 26<br>04<br>6 | A G | 52.<br>64            | P<br>A<br>S<br>S | AC=1;AF=0.500;AN=2;BaseQRankSum=-3.190e-01;DP=10;ExcessHet=0.0000;FS=3.332;MLEAC=1;MLEAF=0.500;MQ=60.00;MQRankSum=0.00;QD=6.58;ReadPosRankSum=-6.190e-01;SOR=2.303 | GT<br>:A<br>D:<br>DP:<br>GQ<br>:PL                                                                                                                                   | 0/1:6,<br>2:8:60<br>:60,0,3<br>30                                  | BA<br>.5 | no  |
| 26<br>06<br>0 | C T | 22<br>67<br>65.<br>1 | P<br>A<br>S<br>S | AC=2;AF=1.00;AN=2;BaseQRankSum=9.29;DP=5981;ExcessHet=0.0000;FS=0.000;MLEAC=2;MLEAF=1.00;MQ=60.00;MQRankSum=0.00;QD=27.00;ReadPosRankSum=4.62;SOR=0.214            | GT<br>:A<br>D:<br>DP:<br>GQ<br>:PL                                                                                                                                   | 1/1:17<br>,5421:<br>5445:9<br>9:2267<br>79,168<br>63,0             | BA<br>.5 | yes |
| 26<br>19<br>2 | C T | 17<br>6.0<br>2       | P<br>A<br>S<br>S | AC=2;AF=1.00;AN=2;DP=7;ExcessHet=0.0000;FS=0.00;MLEAC=2;MLEAF=1.00;MQ=60.00;QD=25.15;SOR=0.941                                                                     | GT<br>:A<br>D:<br>DP:                                                                                                                                                | 1/1:0,<br>7:7:21<br>:190,2<br>1,0                                  | BA<br>.5 | no  |

| 26 |   |   | 22  | P | AC=2;AF=1.00;AN=2;Base    | GT  | 1/1:2, |    |  |     |  |  |
|----|---|---|-----|---|---------------------------|-----|--------|----|--|-----|--|--|
| 27 | C | T | 81  | A | QRankSum=3.79;DP=5939;    | :A  | 5749:5 |    |  |     |  |  |
| 0  |   |   | 38. | S | ExcessHet=0.0000;FS=0.00  | D:  | 753:99 | BA |  | yes |  |  |
|    |   |   | 1   | S | 0;MLEAC=2;MLEAF=1.00;     | DP: | :22815 | .5 |  |     |  |  |
|    |   |   |     |   | MQ=60.00;MQRankSum=0.     | GQ  | 2,1724 |    |  |     |  |  |
|    |   |   |     |   | 00;QD=30.82;ReadPosRank   | :PL | 0,0    |    |  |     |  |  |
|    |   |   |     |   | Sum=2.41;SOR=1.208        |     |        |    |  |     |  |  |
| 26 |   |   |     | P | AC=2;AF=1.00;AN=2;DP=     | GT  |        |    |  |     |  |  |
| 50 | G | A | 32. | A | 1;ExcessHet=0.0000;FS=0.0 | :A  | 1/1:0, |    |  |     |  |  |
| 5  |   |   | 48  | S | 00;MLEAC=1;MLEAF=0.5      | D:  | 1:1:3: | BA |  | no  |  |  |
|    |   |   |     | S | 00;MQ=60.00;QD=32.48;S    | DP: | 42,3,0 | .5 |  |     |  |  |
|    |   |   |     |   | OR=1.609                  | GQ  |        |    |  |     |  |  |
|    |   |   |     |   |                           | :PL |        |    |  |     |  |  |
| 26 |   |   | 23  | P | AC=2;AF=1.00;AN=2;Base    | GT  | 1/1:2, |    |  |     |  |  |
| 52 | G | A | 67  | A | QRankSum=0.081;DP=5608    | :A  | 5523:5 |    |  |     |  |  |
| 9  |   |   | 00. | S | ;ExcessHet=0.0000;FS=0.00 | D:  | 525:99 | BA |  | yes |  |  |
|    |   |   | 1   | S | 0;MLEAC=2;MLEAF=1.00;     | DP: | :23671 | .5 |  |     |  |  |
|    |   |   |     |   | MQ=60.00;MQRankSum=0.     | GQ  | 4,1656 |    |  |     |  |  |
|    |   |   |     |   | 00;QD=29.27;ReadPosRank   | :PL | 4,0    |    |  |     |  |  |
|    |   |   |     |   | Sum=0.997;SOR=0.594       |     |        |    |  |     |  |  |
| 26 |   |   | 24  | P | AC=2;AF=1.00;AN=2;DP=     | GT  | 1/1:4, |    |  |     |  |  |
| 57 | C | G | 80  | A | 5865;ExcessHet=0.0000;FS  | :A  | 5791:5 |    |  |     |  |  |
| 7  |   |   | 09. | S | =0.000;MLEAC=2;MLEAF      | D:  | 798:99 | BA |  | yes |  |  |
|    |   |   | 1   | S | =1.00;MQ=60.00;MQRankS    | DP: | :24802 | .5 |  |     |  |  |
|    |   |   |     |   | um=0.00;QD=35.92;SOR=0    | GQ  | 3,1730 |    |  |     |  |  |
|    |   |   |     |   | .741                      | :PL | 3,0    |    |  |     |  |  |
|    |   |   |     |   |                           |     |        |    |  |     |  |  |
| 26 |   |   | 23  | P | AC=2;AF=1.00;AN=2;Base    | GT  | 1/1:5, |    |  |     |  |  |
| 70 | G | A | 06  | A | QRankSum=3.15;DP=5971;    | :A  | 5792:5 |    |  |     |  |  |
| 9  |   |   | 94. | S | ExcessHet=0.0000;FS=0.00  | D:  | 797:99 | BA |  | yes |  |  |
|    |   |   | 1   | S | 0;MLEAC=2;MLEAF=1.00;     | DP: | :23070 | .5 |  |     |  |  |
|    |   |   |     |   | MQ=60.00;MQRankSum=-      | GQ  | 8,1731 |    |  |     |  |  |
|    |   |   |     |   | 2.000e-                   | :PL | 3,0    |    |  |     |  |  |
|    |   |   |     |   | 03;QD=29.63;ReadPosRank   |     |        |    |  |     |  |  |
|    |   |   |     |   | Sum=3.46;SOR=0.461        |     |        |    |  |     |  |  |
|    |   |   |     |   |                           |     |        |    |  |     |  |  |
| 27 |   |   | 21  | P | AC=2;AF=1.00;AN=2;Base    | GT  | 1/1:5, |    |  |     |  |  |
| 01 | C | T | 60  | A | QRankSum=0.160;DP=5784    | :A  | 5535:5 |    |  |     |  |  |
| 2  |   |   | 80. | S | ;ExcessHet=0.0000;FS=0.00 | D:  | 540:99 | BA |  | yes |  |  |
|    |   |   | 1   | S | 0;MLEAC=2;MLEAF=1.00;     | DP: | :21609 | .5 |  |     |  |  |
|    |   |   |     |   | MQ=60.00;MQRankSum=-      | GQ  | 4,1652 |    |  |     |  |  |
|    |   |   |     |   | 3.510e-                   | :PL | 3,0    |    |  |     |  |  |
|    |   |   |     |   | 01;QD=28.76;ReadPosRank   |     |        |    |  |     |  |  |
|    |   |   |     |   | Sum=2.69;SOR=0.266        |     |        |    |  |     |  |  |

|    |   |     |   |                                                                                      |     |        |    |     |
|----|---|-----|---|--------------------------------------------------------------------------------------|-----|--------|----|-----|
| 27 |   | 14  | P | AC=1;AF=0.500;AN=2;BaseQRankSum=-3.900e-                                             | GT  | 0/1:39 |    |     |
| 03 | A | 19  | A | 01;DP=1033;ExcessHet=0.000;FS=0.526;MLEAC=1;                                         | :A  | 7,567: | BA | yes |
| 8  | G | 3.6 | S | MLEAF=0.500;MQ=60.00;                                                                | D:  | 964:99 | .5 |     |
|    |   | 4   | S | MQRankSum=0.00;QD=14.72;ReadPosRankSum=3.22;SOR=0.733                                | DP: | :14201 |    |     |
|    |   |     |   |                                                                                      | GQ  | ,0,911 |    |     |
|    |   |     |   |                                                                                      | :PL | 2      |    |     |
| 27 |   | 39  | P | AC=1;AF=0.500;AN=2;BaseQRankSum=-                                                    | GT  | 0/1:14 |    |     |
| 33 | C | 2.6 | A | 1.163e+00;DP=175;ExcessHet=0.0000;FS=0.767;MLE                                       | :A  | 3,29:1 | BA | no  |
| 5  | T | 4   | S | AC=1;MLEAF=0.500;MQ=60.00;MQRankSum=0.00;QD=2.28;ReadPosRankSum=-4.711e+00;SOR=0.849 | D:  | 72:99: | .5 |     |
|    |   |     | S |                                                                                      | DP: | 0/1:27 |    |     |
|    |   |     |   |                                                                                      | GQ  | 335_C  |    |     |
|    |   |     |   |                                                                                      | :PG | _T:40  |    |     |
|    |   |     |   |                                                                                      | T:P | 0,0,55 |    |     |
|    |   |     |   |                                                                                      | ID: | 35:273 |    |     |
|    |   |     |   |                                                                                      | PL: | 35     |    |     |
|    |   |     |   |                                                                                      | PS  |        |    |     |
| 27 |   | 48  | P | AC=2;AF=1.00;AN=2;DP=1781;ExcessHet=0.0000;FS                                        | GT  | 1/1:0, |    |     |
| 43 | T | 33  | A | =0.000;MLEAC=2;MLEAF=1.00;MQ=60.00;QD=28.20;SOR=0.722                                | :A  | 1714:1 | BA | yes |
| 8  | C | 8.0 | S |                                                                                      | D:  | 714:99 | .5 |     |
|    |   | 6   | S |                                                                                      | DP: | :48352 |    |     |
|    |   |     |   |                                                                                      | GQ  | ,5130, |    |     |
|    |   |     |   |                                                                                      | :PL | 0      |    |     |
| 27 |   | 97  | P | AC=2;AF=1.00;AN=2;BaseQRankSum=-                                                     | GT  | 1/1:14 |    |     |
| 47 | C | 11  | A | 4.188e+00;DP=2545;ExcessHet=0.0000;FS=0.000;MLE                                      | :A  | ,2173: | BA | yes |
| 6  | T | 7.0 | S | AC=2;MLEAF=1.00;MQ=60.00;MQRankSum=0.00;QD=26.08;ReadPosRankSum=2.80;SOR=0.004       | D:  | 2187:9 | .5 |     |
|    |   | 6   | S |                                                                                      | DP: | 9:9713 |    |     |
|    |   |     |   |                                                                                      | GQ  | 1,6843 |    |     |
|    |   |     |   |                                                                                      | :PL | ,0     |    |     |
| 27 |   | 20  | P | AC=2;AF=1.00;AN=2;BaseQRankSum=-4.290e-                                              | GT  | 1/1:2, |    |     |
| 51 | C | 60  | A | 01;DP=5426;ExcessHet=0.000;FS=0.000;MLEAC=2;                                         | :A  | 5258:5 | BA | yes |
| 3  | T | 59. | S | MLEAF=1.00;MQ=60.00;MQRankSum=-4.820e-                                               | D:  | 260:99 | .5 |     |
|    |   | 1   | S | 01;QD=29.94;ReadPosRankSum=1.61;SOR=0.726                                            | DP: | :20607 |    |     |
|    |   |     |   |                                                                                      | GQ  | 3,1573 |    |     |
|    |   |     |   |                                                                                      | :PL | 2,0    |    |     |
| 27 |   | 65  | P | AC=1;AF=0.500;AN=2;BaseQRankSum=1.20;DP=460;                                         | GT  | 0/1:16 |    |     |
| 53 | C | 74. | A | ExcessHet=0.0000;FS=1.148;MLEAC=1;MLEAF=0.50                                         | :A  | 3,274: | BA | yes |
| 2  | T | 64  | S | 0;MQ=60.00;MQRankSum=                                                                | D:  | 437:99 | .5 |     |
|    |   |     | S |                                                                                      | DP: | :6582, |    |     |
|    |   |     |   |                                                                                      | GQ  | 0,3345 |    |     |
|    |   |     |   |                                                                                      | :PL |        |    |     |

|    |   |     |   |                                                                                                                                                                   |     |         |    |    |     |
|----|---|-----|---|-------------------------------------------------------------------------------------------------------------------------------------------------------------------|-----|---------|----|----|-----|
| 27 |   | 22  | P | 0.00;QD=15.04;ReadPosRankSum=0.836;SOR=0.589                                                                                                                      | GT  | 1/1:1,  |    |    |     |
| 80 | C | 57  | A | AC=2;AF=1.00;AN=2;BaseQRankSum=-3.750e-01;DP=5934;ExcessHet=0.000;FS=0.000;MLEAC=2;                                                                               | :A  | 4299:4  |    |    |     |
| 7  | T | 90. | S | MLEAF=1.00;MQ=60.00;MQRankSum=0.00;QD=31.54                                                                                                                       | D:  | 326:99  | BA | .5 | yes |
|    |   | 1   | S | ;ReadPosRankSum=0.330;SOR=0.242                                                                                                                                   | DP: | :22580  |    |    |     |
|    |   |     |   |                                                                                                                                                                   | GQ  | 4,1711  |    |    |     |
|    |   |     |   |                                                                                                                                                                   | :PL | 3,0     |    |    |     |
| 27 |   | 22  | P | AC=2;AF=1.00;AN=2;BaseQRankSum=4.02;DP=5954;                                                                                                                      | GT  | 1/1:6,  |    |    |     |
| 88 | C | 96  | A | ExcessHet=0.0000;FS=0.000;MLEAC=2;MLEAF=1.00;                                                                                                                     | :A  | 5776:5  |    |    |     |
| 9  | T | 49. | S | MQ=60.00;MQRankSum=0.351;QD=28.86;ReadPosRankSum=2.66;SOR=1.138                                                                                                   | D:  | 782:99  | BA | .5 | yes |
|    |   | 1   | S | AC=1;AF=0.500;AN=2;BaseQRankSum=-3.960e-01;DP=13;ExcessHet=0.000;FS=0.000;MLEAC=1;MLEAF=0.500;MQ=60.00;MQRankSum=0.00;QD=4.05;ReadPosRankSum=0.362;SOR=0.527      | DP: | :22966  |    |    |     |
|    |   |     |   |                                                                                                                                                                   | GQ  | 3,1720  |    |    |     |
|    |   |     |   |                                                                                                                                                                   | :PL | 8,0     |    |    |     |
| 27 |   | 52. | P | AC=1;AF=0.500;AN=2;BaseQRankSum=-8.210e-01;DP=2312;ExcessHet=0.000;FS=0.546;MLEAC=1;MLEAF=0.500;MQ=60.00;MQRankSum=0.00;QD=7.74;ReadPosRankSum=0.413;SOR=0.768    | GT  | 0/1:9,  |    |    |     |
| 99 | C | 64  | A | AC=1;AF=0.500;AN=2;BaseQRankSum=-1.760e-01;DP=19;ExcessHet=0.000;FS=0.000;MLEAC=1;MLEAF=0.500;MQ=60.00;MQRankSum=0.00;QD=3.72;ReadPosRankSum=-2.081e+00;SOR=1.179 | :A  | 4:13:6  | BA | .5 | no  |
| 8  | T |     | S |                                                                                                                                                                   | D:  | 0:60,0, |    |    |     |
|    |   |     | S |                                                                                                                                                                   | DP: | 201     |    |    |     |
|    |   |     |   |                                                                                                                                                                   | GQ  |         |    |    |     |
|    |   |     |   |                                                                                                                                                                   | :PL |         |    |    |     |
| 28 |   | 16  | P | AC=1;AF=0.500;AN=2;BaseQRankSum=-1.760e-01;DP=19;ExcessHet=0.000;FS=0.000;MLEAC=1;MLEAF=0.500;MQ=60.00;MQRankSum=0.00;QD=3.72;ReadPosRankSum=-2.081e+00;SOR=1.179 | GT  | 0/1:14  |    |    |     |
| 08 | T | 99  | A | AC=1;AF=0.500;AN=2;BaseQRankSum=-1.760e-01;DP=19;ExcessHet=0.000;FS=0.000;MLEAC=1;MLEAF=0.500;MQ=60.00;MQRankSum=0.00;QD=3.72;ReadPosRankSum=-2.081e+00;SOR=1.179 | :A  | 39,757  |    |    |     |
| 8  | C | 7.6 | S | AC=1;AF=0.500;AN=2;BaseQRankSum=-1.760e-01;DP=19;ExcessHet=0.000;FS=0.000;MLEAC=1;MLEAF=0.500;MQ=60.00;MQRankSum=0.00;QD=3.72;ReadPosRankSum=-2.081e+00;SOR=1.179 | D:  | :2196:  | BA | .5 | no  |
|    |   | 4   | S |                                                                                                                                                                   | DP: | 99:170  |    |    |     |
|    |   |     |   |                                                                                                                                                                   | GQ  | 05,0,3  |    |    |     |
|    |   |     |   |                                                                                                                                                                   | :PL | 8930    |    |    |     |
| 28 |   | 70. | P | AC=1;AF=0.500;AN=2;BaseQRankSum=-1.760e-01;DP=19;ExcessHet=0.000;FS=0.000;MLEAC=1;MLEAF=0.500;MQ=60.00;MQRankSum=0.00;QD=3.72;ReadPosRankSum=-2.081e+00;SOR=1.179 | GT  | 0 1:16, |    |    |     |
| 25 | T | 64  | A | AC=1;AF=0.500;AN=2;BaseQRankSum=-1.760e-01;DP=19;ExcessHet=0.000;FS=0.000;MLEAC=1;MLEAF=0.500;MQ=60.00;MQRankSum=0.00;QD=3.72;ReadPosRankSum=-2.081e+00;SOR=1.179 | :A  | 3:19:7  |    |    |     |
| 1  | G |     | S |                                                                                                                                                                   | D:  | 8:0 1:2 | BA | .5 | no  |
|    |   |     | S |                                                                                                                                                                   | GQ  | 8251_   |    |    |     |
|    |   |     |   |                                                                                                                                                                   | :PG | T_G:7   |    |    |     |
|    |   |     |   |                                                                                                                                                                   | T:P | 8,0,66  |    |    |     |
|    |   |     |   |                                                                                                                                                                   | ID: | 2:2825  |    |    |     |
|    |   |     |   |                                                                                                                                                                   | PL: | 1       |    |    |     |
|    |   |     |   |                                                                                                                                                                   | PS  |         |    |    |     |
| 28 |   | 70. | P | AC=1;AF=0.500;AN=2;BaseQRankSum=-1.760e-01;DP=20;ExcessHet=0.000                                                                                                  | GT  | 0 1:16, |    |    |     |
| 25 | T | 64  | A | AC=1;AF=0.500;AN=2;BaseQRankSum=-1.760e-01;DP=20;ExcessHet=0.000                                                                                                  | :A  | 3:19:7  | BA | .5 | no  |
| 2  | A |     | A |                                                                                                                                                                   | D:  | 8:0 1:2 |    |    |     |

|    |   |   |     |                          |                           |         |         |     |
|----|---|---|-----|--------------------------|---------------------------|---------|---------|-----|
|    |   |   | S   | 0;FS=0.000;MLEAC=1;ML    | DP:                       | 8251_   |         |     |
|    |   |   | S   | EAF=0.500;MQ=60.00;MQ    | GQ                        | T_G:7   |         |     |
|    |   |   |     | RankSum=0.00;QD=3.72;R   | :PG                       | 8,0,66  |         |     |
|    |   |   |     | eadPosRankSum=-          | T:P                       | 2:2825  |         |     |
|    |   |   |     | 1.971e+00;SOR=1.179      | ID:                       | 1       |         |     |
|    |   |   |     |                          | PL:                       |         |         |     |
|    |   |   |     |                          | PS                        |         |         |     |
|    |   |   |     |                          | GT                        |         |         |     |
|    |   |   |     | AC=1;AF=0.500;AN=2;Bas   | :A                        | 0 1:16, |         |     |
|    |   |   |     | eQRankSum=-5.240e-       | D:                        | 3:19:7  |         |     |
| 28 |   |   | P   | 01;DP=20;ExcessHet=0.000 | DP:                       | 8:0 1:2 |         |     |
| 25 | C | A | 70. | A                        | 0;FS=0.000;MLEAC=1;ML     | GQ      | 8251_   | BA  |
| 3  |   |   | 64  | S                        | EAF=0.500;MQ=60.00;MQ     | :PG     | T_G:7   | .5  |
|    |   |   |     | S                        | RankSum=0.00;QD=3.72;R    | T:P     | 8,0,66  | no  |
|    |   |   |     |                          | eadPosRankSum=-           | ID:     | 2:2825  |     |
|    |   |   |     |                          | 1.631e+00;SOR=1.179       | PL:     | 1       |     |
|    |   |   |     |                          | PS                        |         |         |     |
|    |   |   |     |                          | GT                        |         |         |     |
|    |   |   |     | AC=2;AF=1.00;AN=2;Base   | :A                        | 1 1:1,5 |         |     |
|    |   |   |     | QRankSum=-4.060e-        | D:                        | 661:56  |         |     |
| 28 |   |   | 23  | P                        | 01;DP=5985;ExcessHet=0.0  | DP:     | 62:99:  |     |
| 27 | A | T | 84  | A                        | 000;FS=0.000;MLEAC=2;     | GQ      | 1 1:28  | BA  |
| 1  |   |   | 37. | S                        | MLEAF=1.00;MQ=60.00;M     | :PG     | 271_A   | .5  |
|    |   |   | 1   | S                        | QRankSum=0.825;QD=29.4    | T:P     | _T:23   | yes |
|    |   |   |     |                          | 1;ReadPosRankSum=0.046;   | ID:     | 8451,1  |     |
|    |   |   |     |                          | SOR=0.416                 | PL:     | 7084,0  |     |
|    |   |   |     |                          |                           | PS      | :28271  |     |
|    |   |   |     |                          |                           | GT      |         |     |
|    |   |   |     | AC=2;AF=1.00;AN=2;Base   | :A                        | 1 1:1,5 |         |     |
|    |   |   |     | QRankSum=-4.950e-        | D:                        | 654:56  |         |     |
| 28 |   |   | 25  | P                        | 01;DP=5656;ExcessHet=0.0  | DP:     | 55:99:  |     |
| 31 | C | T | 30  | A                        | 000;FS=0.000;MLEAC=2;     | GQ      | 1 1:28  | BA  |
| 1  |   |   | 00. | S                        | MLEAF=1.00;MQ=60.00;M     | :PG     | 271_A   | .5  |
|    |   |   | 1   | S                        | QRankSum=0.00;QD=31.11    | T:P     | _T:25   | yes |
|    |   |   |     |                          | ;ReadPosRankSum=1.31;SO   | ID:     | 3014,1  |     |
|    |   |   |     |                          | R=0.292                   | PL:     | 6975,0  |     |
|    |   |   |     |                          |                           | PS      | :28271  |     |
|    |   |   |     |                          |                           | GT      |         |     |
|    |   |   |     | AC=2;AF=1.00;AN=2;DP=    | :A                        | 1/1:0,  |         |     |
| 28 |   |   | 24  | P                        | 5383;ExcessHet=0.0000;FS  | D:      | 5164:5  |     |
| 33 | A | G | 03  | A                        | =0.000;MLEAC=2;MLEAF      | DP:     | 167:99  | BA  |
| 0  |   |   | 37. | S                        | =1.00;MQ=60.00;QD=34.66   | GQ      | :24035  | .5  |
|    |   |   | 1   | S                        | ;SOR=0.807                | :PL     | 7,0     | yes |
|    |   |   |     |                          |                           | GT      |         |     |
| 28 |   |   | 35. | P                        | AC=2;AF=1.00;AN=2;DP=     | :A      | 1 1:0,1 | BA  |
| 34 | C | T | 48  | A                        | 1;ExcessHet=0.0000;FS=0.0 | D:      | :1:3:1  | .5  |
| 4  |   |   |     |                          | 00;MLEAC=1;MLEAF=0.5      | ID:     | 1:2834  | no  |

|    |     |     |   |                           |               |  |     |
|----|-----|-----|---|---------------------------|---------------|--|-----|
|    |     |     | S | 00;MQ=60.00;QD=25.41;S    | DP: 1_C_      |  |     |
|    |     |     | S | OR=1.609                  | GQ CA:45      |  |     |
|    |     |     |   |                           | :PG ,3,0:28   |  |     |
|    |     |     |   |                           | T:P 341       |  |     |
|    |     |     |   |                           | ID:           |  |     |
|    |     |     |   |                           | PL:           |  |     |
|    |     |     |   |                           | PS            |  |     |
|    |     |     |   |                           | GT            |  |     |
|    |     |     |   |                           | :A            |  |     |
|    |     |     |   |                           | D: 1 1:0,1    |  |     |
|    |     |     |   |                           | :1:3:1        |  |     |
| 28 |     |     | P | AC=2;AF=1.00;AN=2;DP=     | DP: 1:2834    |  |     |
| 34 | A C | 35. | A | 1;ExcessHet=0.0000;FS=0.0 | GQ 1_C_ BA    |  |     |
| 9  |     | 48  | S | 00;MLEAC=1;MLEAF=0.5      | :PG CA:45 .5  |  | no  |
|    |     |     | S | 00;MQ=60.00;QD=28.50;S    | T:P ,3,0:28   |  |     |
|    |     |     |   | OR=1.609                  | ID: 341       |  |     |
|    |     |     |   |                           | PL:           |  |     |
|    |     |     |   |                           | PS            |  |     |
|    |     |     |   |                           | GT            |  |     |
|    |     |     |   |                           | :A 1/1:5,     |  |     |
|    |     |     |   |                           | D: 2453:2     |  |     |
| 28 |     | 74  | P | AC=2;AF=1.00;AN=2;Base    | D: 458:99 BA  |  |     |
| 50 | G T | 47  | A | QRankSum=3.97;DP=2609;    | DP: :74492 .5 |  | yes |
| 9  |     | 8.0 | S | ExcessHet=0.0000;FS=0.00  | GQ ,7296,     |  |     |
|    |     | 6   | S | 0;MLEAC=2;MLEAF=1.00;     | :PL 0         |  |     |
|    |     |     |   | MQ=60.00;MQRankSum=0.     |               |  |     |
|    |     |     |   | 00;QD=30.30;ReadPosRank   |               |  |     |
|    |     |     |   | Sum=1.28;SOR=0.029        |               |  |     |
|    |     |     |   | AC=2;AF=1.00;AN=2;Base    |               |  |     |
|    |     |     |   | QRankSum=-                | GT 1/1:17     |  |     |
| 28 |     | 20  | P | 1.608e+00;DP=4835;Excess  | :A ,4650:     |  |     |
| 88 | G A | 79  | A | Het=0.0000;FS=0.000;MLE   | D: 4671:9 BA  |  |     |
| 1  |     | 32. | S | AC=2;MLEAF=1.00;MQ=6      | DP: 9:2079 .5 |  | yes |
|    |     | 1   | S | 0.00;MQRankSum=0.090;Q    | GQ 46,127     |  |     |
|    |     |     |   | D=36.76;ReadPosRankSum    | :PL 77,0      |  |     |
|    |     |     |   | =4.16;SOR=0.079           |               |  |     |
|    |     |     |   | AC=2;AF=1.00;AN=2;Base    |               |  |     |
|    |     |     |   | QRankSum=-1.000e-         | GT 1/1:25     |  |     |
| 28 |     | 18  | P | 01;DP=4815;ExcessHet=0.0  | :A ,4608:     |  |     |
| 88 | G A | 07  | A | 000;FS=0.000;MLEAC=2;     | D: 4635:9 BA  |  |     |
| 2  |     | 09. | S | MLEAF=1.00;MQ=60.00;M     | DP: 9:2083 .5 |  | yes |
|    |     | 1   | S | QRankSum=0.00;QD=30.54    | GQ 15,128     |  |     |
|    |     |     |   | ;ReadPosRankSum=1.16;SO   | :PL 06,0      |  |     |
|    |     |     |   | R=0.165                   |               |  |     |
|    |     |     |   | AC=2;AF=1.00;AN=2;Base    | GT 1/1:16     |  |     |
| 28 |     | 20  | P | QRankSum=1.57;DP=4736;    | :A ,4612:     |  |     |
| 88 | G C | 81  | A | ExcessHet=0.0000;FS=0.00  | D: 4645:9 BA  |  |     |
| 3  |     | 33. | S | 0;MLEAC=2;MLEAF=1.00;     | DP: 9:2082 .5 |  | yes |
|    |     | 1   | S | MQ=60.00;MQRankSum=-      | GQ 08,130     |  |     |
|    |     |     |   | 9.300e-                   | :PL 21,0      |  |     |

|    |   |     |   |                                                                                       |             |    |     |  |
|----|---|-----|---|---------------------------------------------------------------------------------------|-------------|----|-----|--|
| 28 |   | 15  | P | 02;QD=21.53;ReadPosRank<br>Sum=4.93;SOR=0.079<br>AC=2;AF=1.00;AN=2;Base<br>QRankSum=- | GT 1/1:12   |    |     |  |
| 99 | C | 93  | A | 1.003e+00;DP=4294;Excess                                                              | :A ,4164:   |    |     |  |
| 4  | A | 09. | S | Het=0.0000;FS=0.000;MLE                                                               | D: 4176:9   | BA | yes |  |
|    |   | 1   | S | AC=2;MLEAF=1.00;MQ=6                                                                  | DP: 9:1593  | .5 |     |  |
|    |   |     | S | 0.00;MQRankSum=0.00;QD                                                                | GQ 23,120   |    |     |  |
|    |   |     |   | =29.53;ReadPosRankSum=2                                                               | :PL 50,0    |    |     |  |
|    |   |     |   | .87;SOR=0.465                                                                         |             |    |     |  |
|    |   |     |   |                                                                                       | GT          |    |     |  |
| 29 |   |     | P | AC=1;AF=0.500;AN=2;Bas                                                                | :A 0 1:1,1  |    |     |  |
| 02 | T | 31. | A | eQRankSum=-6.740e-                                                                    | D: :2:39:   |    |     |  |
| 9  | C | 64  | S | 01;DP=2;ExcessHet=0.0000                                                              | DP: 0 1:29  | BA | no  |  |
|    |   |     | S | ;FS=0.000;MLEAC=1;MLE                                                                 | GQ 029_T    | .5 |     |  |
|    |   |     | S | AF=0.500;MQ=60.00;MQR                                                                 | :PG _C:39,  |    |     |  |
|    |   |     |   | ankSum=0.00;QD=15.82;Re                                                               | T:P 0,39:2  |    |     |  |
|    |   |     |   | adPosRankSum=0.674;SOR                                                                | ID: 9029    |    |     |  |
|    |   |     |   | =1.447                                                                                | PL:         |    |     |  |
|    |   |     |   |                                                                                       | PS          |    |     |  |
|    |   |     |   |                                                                                       | GT          |    |     |  |
| 29 |   |     | P | AC=1;AF=0.500;AN=2;Bas                                                                | :A 0 1:1,1  |    |     |  |
| 03 | A | 31. | A | eQRankSum=-6.740e-                                                                    | D: :2:39:   |    |     |  |
| 9  | T | 64  | S | 01;DP=2;ExcessHet=0.0000                                                              | DP: 0 1:29  | BA | no  |  |
|    |   |     | S | ;FS=0.000;MLEAC=1;MLE                                                                 | GQ 029_T    | .5 |     |  |
|    |   |     | S | AF=0.500;MQ=60.00;MQR                                                                 | :PG _C:39,  |    |     |  |
|    |   |     |   | ankSum=0.00;QD=15.82;Re                                                               | T:P 0,39:2  |    |     |  |
|    |   |     |   | adPosRankSum=0.674;SOR                                                                | ID: 9029    |    |     |  |
|    |   |     |   | =1.447                                                                                | PL:         |    |     |  |
|    |   |     |   |                                                                                       | PS          |    |     |  |
|    |   |     |   |                                                                                       | GT          |    |     |  |
| 29 |   |     | P | AC=2;AF=1.00;AN=2;DP=                                                                 | D: 1 1:0,1  |    |     |  |
| 04 | G | 35. | A | 1;ExcessHet=0.0000;FS=0.0                                                             | DP: :1:3:1  |    |     |  |
| 9  | A | 48  | S | 00;MLEAC=1;MLEAF=0.5                                                                  | GQ 1:2902   | BA | no  |  |
|    |   |     | S | 00;MQ=60.00;QD=31.31;S                                                                | :PG 9_T_C   | .5 |     |  |
|    |   |     |   | OR=1.609                                                                              | T:P :45,3,0 |    |     |  |
|    |   |     |   |                                                                                       | ID: :29029  |    |     |  |
|    |   |     |   |                                                                                       | PL:         |    |     |  |
|    |   |     |   |                                                                                       | PS          |    |     |  |
|    |   |     |   |                                                                                       | GT 1/1:0,   |    |     |  |
| 29 |   | 67  | P | AC=2;AF=1.00;AN=2;DP=                                                                 | :A 2158:2   |    |     |  |
| 09 | G | 65  | A | 2228;ExcessHet=0.0000;FS                                                              | D: 158:99   | BA | yes |  |
| 0  | T | 5.0 | S | =0.000;MLEAC=2;MLEAF                                                                  | DP: :67669  | .5 |     |  |
|    |   | 6   | S | =1.00;MQ=60.00;QD=31.35                                                               | GQ ,6475,   |    |     |  |
|    |   |     |   | ;SOR=0.903                                                                            | :PL 0       |    |     |  |



|    |     |                      |   |                                                                                                                                                               |                                                                           |          |     |
|----|-----|----------------------|---|---------------------------------------------------------------------------------------------------------------------------------------------------------------|---------------------------------------------------------------------------|----------|-----|
| 29 | C T | 37.<br>64            | P | AC=1;AF=0.500;AN=2;BaseQRankSum=-9.340e-01;DP=16;ExcessHet=0.000                                                                                              | GT :A 0 1:13,<br>D: 2:15:4<br>DP: 5:0 1:2                                 | BA<br>.5 | no  |
| 18 |     |                      | A | 0;FS=0.000;MLEAC=1;MLEAF=0.500;MQ=60.00;MQRankSum=0.00;QD=2.51;ReadPosRankSum=-1.791e+00;SOR=0.569                                                            | GQ 9187_<br>:PG C_T:4<br>T:P 5,0,54<br>ID: 0:2918<br>PL: 7<br>PS<br>GT    |          |     |
| 7  |     |                      | S |                                                                                                                                                               |                                                                           |          |     |
|    |     |                      | S |                                                                                                                                                               |                                                                           |          |     |
|    |     |                      |   |                                                                                                                                                               |                                                                           |          |     |
| 29 | A G | 37.<br>64            | P | AC=1;AF=0.500;AN=2;BaseQRankSum=-9.340e-01;DP=15;ExcessHet=0.000                                                                                              | GT :A 0 1:13,<br>D: 2:15:4<br>DP: 5:0 1:2                                 | BA<br>.5 | no  |
| 18 |     |                      | A | 0;FS=0.000;MLEAC=1;MLEAF=0.500;MQ=60.00;MQRankSum=0.00;QD=2.51;ReadPosRankSum=-1.967e+00;SOR=0.569                                                            | GQ 9187_<br>:PG C_T:4<br>T:P 5,0,54<br>ID: 0:2918<br>PL: 7<br>PS<br>GT    |          |     |
| 8  |     |                      | S |                                                                                                                                                               |                                                                           |          |     |
|    |     |                      | S |                                                                                                                                                               |                                                                           |          |     |
|    |     |                      |   |                                                                                                                                                               |                                                                           |          |     |
| 29 | A C | 20<br>76<br>58.<br>1 | P | AC=2;AF=1.00;AN=2;BaseQRankSum=3.92;DP=5606;ExcessHet=0.0000;FS=0.00                                                                                          | GT 1/1:4,<br>:A 5290:5<br>D: 294:99<br>DP: :20767<br>GQ 2,1581<br>:PL 7,0 | BA<br>.5 | yes |
| 51 |     |                      | A | 0;MLEAC=2;MLEAF=1.00;MQ=60.00;MQRankSum=0.347;QD=34.87;ReadPosRankSum=3.36;SOR=0.420                                                                          |                                                                           |          |     |
| 0  |     |                      | S |                                                                                                                                                               |                                                                           |          |     |
|    |     |                      | S |                                                                                                                                                               |                                                                           |          |     |
|    |     |                      |   |                                                                                                                                                               |                                                                           |          |     |
| 29 | C T | 94<br>15<br>2.0<br>6 | P | AC=2;AF=1.00;AN=2;DP=2735;ExcessHet=0.0000;FS=0.0000;MLEAC=2;MLEAF=1.00;MQ=60.00;QD=26.08;SOR=1.010                                                           | GT 1/1:0,<br>:A 2588:2<br>D: 589:99<br>DP: :94166<br>GQ ,8038,<br>:PL 0   | BA<br>.5 | yes |
| 61 |     |                      | A |                                                                                                                                                               |                                                                           |          |     |
| 4  |     |                      | S |                                                                                                                                                               |                                                                           |          |     |
|    |     |                      | S |                                                                                                                                                               |                                                                           |          |     |
|    |     |                      |   |                                                                                                                                                               |                                                                           |          |     |
| 29 | C T | 35<br>95<br>3.0<br>6 | P | AC=2;AF=1.00;AN=2;BaseQRankSum=-6.040e-01;DP=1437;ExcessHet=0.0000;FS=0.000;MLEAC=2;MLEAF=1.00;MQ=60.00;MQRankSum=0.00;QD=26.57;ReadPosRankSum=1.32;SOR=0.849 | GT 1/1:29<br>:A ,1324:<br>D: 1356:9<br>DP: 9:3596<br>GQ 7,2754<br>:PL ,0  | BA<br>.5 | yes |
| 63 |     |                      | A |                                                                                                                                                               |                                                                           |          |     |
| 2  |     |                      | S |                                                                                                                                                               |                                                                           |          |     |
|    |     |                      | S |                                                                                                                                                               |                                                                           |          |     |
|    |     |                      |   |                                                                                                                                                               |                                                                           |          |     |
| 29 | C T | 54<br>99<br>8.0<br>6 | P | AC=2;AF=1.00;AN=2;DP=1539;ExcessHet=0.0000;FS=0.000;MLEAC=2;MLEAF=1.00;MQ=60.00;QD=33.85;SOR=0.978                                                            | GT 1/1:0,<br>:A 1513:1<br>D: 513:99<br>DP: :55012                         | BA<br>.5 | yes |
| 66 |     |                      | A |                                                                                                                                                               |                                                                           |          |     |
| 6  |     |                      | S |                                                                                                                                                               |                                                                           |          |     |
|    |     |                      | S |                                                                                                                                                               |                                                                           |          |     |
|    |     |                      |   |                                                                                                                                                               |                                                                           |          |     |

|               |     |                      |                  |                                                                                                    |                                                                                                                                                                                                                                                                                                                                                                                                                                                                                                                                                                               |     |
|---------------|-----|----------------------|------------------|----------------------------------------------------------------------------------------------------|-------------------------------------------------------------------------------------------------------------------------------------------------------------------------------------------------------------------------------------------------------------------------------------------------------------------------------------------------------------------------------------------------------------------------------------------------------------------------------------------------------------------------------------------------------------------------------|-----|
| 29<br>81<br>0 | G T | 85.<br>14            | P<br>A<br>S<br>S | AC=2;AF=1.00;AN=2;DP=4;ExcessHet=0.0000;FS=0.000;MLEAC=2;MLEAF=1.00;MQ=60.00;QD=21.29;SOR=0.693    | GQ ,4539,<br>:PL 0<br>GT<br>:A 1/1:0,<br>D: 4:4:12 BA<br>DP: :99,12, .5<br>GQ 0<br>:PL<br>GT<br>:A 1/1:0,<br>D: 29:29: BA<br>DP: 87:890 .5<br>GQ ,87,0<br>:PL<br>GT<br>:A 1 1:0,3<br>D: :3:9:1 <br>DP: 1:2986<br>GQ 8_G_ BA<br>:PG A:132, .5<br>T:P 9,0:29<br>ID: 868<br>PL:<br>PS<br>GT<br>:A 1/1:0,<br>D: 801:80 BF.<br>DP: 1:99:2 7<br>GQ 7607,2<br>:PL 403,0<br>GT<br>:A 1 1:0,5<br>D: 246:52<br>DP: 46:99:<br>GQ 1 1:21 BF.<br>:PG 0_G_ 7<br>T:P T:225<br>ID: 758,15<br>PL: 783,0:<br>PS 210<br>GT<br>:A 1/1:0,<br>D: 172:17 BF.<br>DP: 2:99:4 7<br>GQ 811,51<br>:PL 6,0 | yes |
| 29<br>86<br>8 | G A | 87<br>6.0<br>6       | P<br>A<br>S<br>S | AC=2;AF=1.00;AN=2;DP=35;ExcessHet=0.0000;FS=0.000;MLEAC=2;MLEAF=1.00;MQ=60.00;QD=30.21;SOR=1.460   | yes                                                                                                                                                                                                                                                                                                                                                                                                                                                                                                                                                                           |     |
| 29<br>87<br>1 | A T | 11<br>8.8<br>4       | P<br>A<br>S<br>S | AC=2;AF=1.00;AN=2;DP=3;ExcessHet=0.0000;FS=0.000;MLEAC=1;MLEAF=0.500;MQ=60.00;QD=35.36;SOR=1.179   | no                                                                                                                                                                                                                                                                                                                                                                                                                                                                                                                                                                            |     |
| 44            | C T | 27<br>59<br>3.0<br>6 | P<br>A<br>S<br>S | AC=2;AF=1.00;AN=2;DP=850;ExcessHet=0.0000;FS=0.000;MLEAC=2;MLEAF=1.00;MQ=60.00;QD=34.45;SOR=1.076  | yes                                                                                                                                                                                                                                                                                                                                                                                                                                                                                                                                                                           |     |
| 21<br>0       | G T | 22<br>57<br>44.<br>1 | P<br>A<br>S<br>S | AC=2;AF=1.00;AN=2;DP=5307;ExcessHet=0.0000;FS=0.000;MLEAC=2;MLEAF=1.00;MQ=60.00;QD=25.36;SOR=0.848 | yes                                                                                                                                                                                                                                                                                                                                                                                                                                                                                                                                                                           |     |
| 21<br>3       | G T | 47<br>97.<br>06      | P<br>A<br>S<br>S | AC=2;AF=1.00;AN=2;DP=175;ExcessHet=0.0000;FS=0.000;MLEAC=2;MLEAF=1.00;MQ=60.00;QD=27.89;SOR=0.815  | yes                                                                                                                                                                                                                                                                                                                                                                                                                                                                                                                                                                           |     |

|          |        |                      |                  |                                                                                                                                                         |                                                                                                                                |                                                                    |          |     |
|----------|--------|----------------------|------------------|---------------------------------------------------------------------------------------------------------------------------------------------------------|--------------------------------------------------------------------------------------------------------------------------------|--------------------------------------------------------------------|----------|-----|
| 24<br>1  | C<br>T | 24<br>22<br>53.<br>1 | P<br>A<br>S<br>S | AC=2;AF=1.00;AN=2;DP=5858;ExcessHet=0.0000;FS=0.000;MLEAC=2;MLEAF=1.00;MQ=60.00;QD=28.73;SOR=0.974                                                      | GT<br>:A<br>D:<br>DP:<br>GQ<br>:PL<br>GT<br>:A<br>D:<br>DP:<br>GQ<br>:PL                                                       | 1/1:0,<br>5793:5<br>793:99<br>:24226<br>7,1742<br>1,0              | BF.<br>7 | yes |
| 67<br>0  | T<br>G | 23<br>47<br>16.<br>1 | P<br>A<br>S<br>S | AC=2;AF=1.00;AN=2;DP=6101;ExcessHet=0.0000;FS=0.000;MLEAC=2;MLEAF=1.00;MQ=60.00;QD=30.97;SOR=0.725                                                      | GT<br>:A<br>D:<br>DP:<br>GQ<br>:PL                                                                                             | 1/1:0,<br>5920:5<br>948:99<br>:23473<br>0,1779<br>9,0              | BF.<br>7 | yes |
| 10<br>85 | G<br>T | 21<br>52<br>36.<br>1 | P<br>A<br>S<br>S | AC=2;AF=1.00;AN=2;DP=5615;ExcessHet=0.0000;FS=0.000;MLEAC=2;MLEAF=1.00;MQ=60.00;QD=27.24;SOR=0.793                                                      | GT<br>:A<br>D:<br>DP:<br>GQ<br>:PL                                                                                             | 1/1:0,<br>5436:5<br>438:99<br>:21525<br>0,1661<br>2,0              | BF.<br>7 | yes |
| 14<br>27 | C<br>T | 13<br>09.<br>06      | P<br>A<br>S<br>S | AC=2;AF=1.00;AN=2;DP=55;ExcessHet=0.0000;FS=0.000;MLEAC=2;MLEAF=1.00;MQ=60.00;QD=26.72;SOR=0.733                                                        | GT<br>:A<br>D:<br>DP:<br>GQ<br>:PL                                                                                             | 1/1:0,<br>49:49:<br>99:132<br>3,147,<br>0                          | BF.<br>7 | no  |
| 14<br>44 | G<br>A | 78.<br>32            | P<br>A<br>S<br>S | AC=2;AF=1.00;AN=2;DP=2;ExcessHet=0.0000;FS=0.000;MLEAC=1;MLEAF=0.500;MQ=60.00;QD=28.17;SOR=0.693                                                        | GT<br>:A<br>D:<br>DP:<br>GQ<br>:PG<br>T:P<br>ID:<br>PL:<br>PS<br>GT<br>:A<br>D:<br>DP:<br>GQ<br>:PG<br>T:P<br>ID:<br>PL:<br>PS | 1 1:0,2<br>:2:6:1 <br>1:1434<br>_A_A<br>GT:90<br>,6,0:14<br>34     | BF.<br>7 | no  |
| 14<br>74 | T<br>A | 34.<br>64            | P<br>A<br>S<br>S | AC=1;AF=0.500;AN=2;BaseQRankSum=0.00;DP=16;ExcessHet=0.0000;FS=0.000;MLEAC=1;MLEAF=0.500;MQ=60.00;MQRankSum=0.00;QD=2.16;ReadPosRankSum=0.828;SOR=0.693 | GT<br>:A<br>D:<br>DP:<br>GQ<br>:PG<br>T:P<br>ID:<br>PL:<br>PS                                                                  | 0 1:14,<br>2:16:4<br>2:0 1:1<br>472_A<br>_AG:4<br>2,0,58<br>2:1472 | BF.<br>7 | no  |
| 14<br>79 | C<br>G | 34.<br>64            | P<br>A           | AC=1;AF=0.500;AN=2;BaseQRankSum=0.00;DP=16;E                                                                                                            | GT<br>:A                                                                                                                       | 0 1:14,<br>2:16:4                                                  | BF.<br>7 | no  |

|    |   |   |     |                           |     |         |     |     |
|----|---|---|-----|---------------------------|-----|---------|-----|-----|
|    |   |   | S   | xcessHet=0.0000;FS=0.000; | D:  | 2:0 1:1 |     |     |
|    |   |   | S   | MLEAC=1;MLEAF=0.500;      | DP: | 472_A   |     |     |
|    |   |   |     | MQ=60.00;MQRankSum=0.     | GQ  | _AG:4   |     |     |
|    |   |   |     | 00;QD=2.16;ReadPosRankS   | :PG | 2,0,58  |     |     |
|    |   |   |     | um=-1.526e+00;SOR=0.693   | T:P | 2:1472  |     |     |
|    |   |   |     |                           | ID: |         |     |     |
|    |   |   |     |                           | PL: |         |     |     |
|    |   |   |     |                           | PS  |         |     |     |
|    |   |   |     |                           | GT  |         |     |     |
|    |   |   |     | AC=1;AF=0.500;AN=2;Bas    | :A  | 0 1:14, |     |     |
|    |   |   |     | eQRankSum=0.00;DP=16;E    | D:  | 2:16:4  |     |     |
| 14 | C | T | 34. | xcessHet=0.0000;FS=0.000; | DP: | 2:0 1:1 | BF. | no  |
| 80 |   |   | 64  | MLEAC=1;MLEAF=0.500;      | GQ  | 472_A   | 7   |     |
|    |   |   |     | MQ=60.00;MQRankSum=0.     | :PG | _AG:4   |     |     |
|    |   |   |     | 00;QD=2.16;ReadPosRankS   | T:P | 2,0,58  |     |     |
|    |   |   |     | um=-2.135e+00;SOR=0.693   | ID: | 2:1472  |     |     |
|    |   |   |     |                           | PL: |         |     |     |
|    |   |   |     |                           | PS  |         |     |     |
|    |   |   |     | AC=2;AF=1.00;AN=2;Base    | GT  | 1/1:4,  |     |     |
|    |   |   |     | QRankSum=0.148;DP=5902    | :A  | 4385:4  |     |     |
| 16 | C | T | 21  | ;ExcessHet=0.0000;FS=0.00 | D:  | 393:99  | BF. | yes |
| 27 |   |   | 61  | 0;MLEAC=2;MLEAF=1.00;     | DP: | :21615  | 7   |     |
|    |   |   | 43. | MQ=60.00;MQRankSum=0.     | GQ  | 7,1673  |     |     |
|    |   |   | 1   | 00;QD=28.20;ReadPosRank   | :PL | 8,0     |     |     |
|    |   |   |     | Sum=2.69;SOR=0.293        |     |         |     |     |
|    |   |   |     |                           | GT  |         |     |     |
|    |   |   |     |                           | :A  |         |     |     |
|    |   |   |     | AC=2;AF=1.00;AN=2;DP=     | D:  | 1 1:0,1 |     |     |
|    |   |   |     | 1;ExcessHet=0.0000;FS=0.0 | DP: | :1:3:1  |     |     |
| 17 | G | A | 35. | 00;MLEAC=1;MLEAF=0.5      | GQ  | 1:1727  | BF. | no  |
| 27 |   |   | 48  | 00;MQ=60.00;QD=26.80;S    | :PG | _G_A:   | 7   |     |
|    |   |   |     | OR=1.609                  | T:P | 45,3,0: |     |     |
|    |   |   |     |                           | ID: | 1727    |     |     |
|    |   |   |     |                           | PL: |         |     |     |
|    |   |   |     |                           | PS  |         |     |     |
|    |   |   |     |                           | GT  |         |     |     |
|    |   |   |     |                           | :A  |         |     |     |
|    |   |   |     | AC=2;AF=1.00;AN=2;DP=     | D:  | 1 1:0,1 |     |     |
|    |   |   |     | 1;ExcessHet=0.0000;FS=0.0 | DP: | :1:3:1  |     |     |
| 17 | A | G | 35. | 00;MLEAC=1;MLEAF=0.5      | GQ  | 1:1727  | BF. | no  |
| 33 |   |   | 48  | 00;MQ=60.00;QD=30.02;S    | :PG | _G_A:   | 7   |     |
|    |   |   |     | OR=1.609                  | T:P | 45,3,0: |     |     |
|    |   |   |     |                           | ID: | 1727    |     |     |
|    |   |   |     |                           | PL: |         |     |     |
|    |   |   |     |                           | PS  |         |     |     |

|    |   |   |     |   |                           |             |     |    |  |
|----|---|---|-----|---|---------------------------|-------------|-----|----|--|
| 17 | C | A | 35. | P | AC=2;AF=1.00;AN=2;DP=     | GT          |     |    |  |
| 34 |   |   | 48  | A | 1;ExcessHet=0.0000;FS=0.0 | :A          |     |    |  |
|    |   |   |     | S | 00;MLEAC=1;MLEAF=0.5      | D: 1 1:0,1  |     |    |  |
|    |   |   |     | S | 00;MQ=60.00;QD=31.98;S    | DP: :1:3:1  |     |    |  |
|    |   |   |     |   | OR=1.609                  | GQ 1:1727   | BF. | no |  |
|    |   |   |     |   |                           | :PG _G_A:   | 7   |    |  |
|    |   |   |     |   |                           | T:P 45,3,0: |     |    |  |
|    |   |   |     |   |                           | ID: 1727    |     |    |  |
|    |   |   |     |   |                           | PL:         |     |    |  |
|    |   |   |     |   |                           | PS          |     |    |  |
|    |   |   |     |   |                           | GT          |     |    |  |
|    |   |   |     |   |                           | :A          |     |    |  |
| 17 | G | A | 35. | P | AC=2;AF=1.00;AN=2;DP=     | D: 1 1:0,1  |     |    |  |
| 36 |   |   | 48  | A | 1;ExcessHet=0.0000;FS=0.0 | DP: :1:3:1  |     |    |  |
|    |   |   |     | S | 00;MLEAC=1;MLEAF=0.5      | GQ 1:1727   | BF. | no |  |
|    |   |   |     | S | 00;MQ=60.00;QD=27.51;S    | :PG _G_A:   | 7   |    |  |
|    |   |   |     |   | OR=1.609                  | T:P 45,3,0: |     |    |  |
|    |   |   |     |   |                           | ID: 1727    |     |    |  |
|    |   |   |     |   |                           | PL:         |     |    |  |
|    |   |   |     |   |                           | PS          |     |    |  |
|    |   |   |     |   |                           | GT          |     |    |  |
|    |   |   |     |   |                           | :A          |     |    |  |
| 17 | G | A | 35. | P | AC=2;AF=1.00;AN=2;DP=     | D: 1 1:0,1  |     |    |  |
| 38 |   |   | 48  | A | 1;ExcessHet=0.0000;FS=0.0 | DP: :1:3:1  |     |    |  |
|    |   |   |     | S | 00;MLEAC=1;MLEAF=0.5      | GQ 1:1727   | BF. | no |  |
|    |   |   |     | S | 00;MQ=60.00;QD=29.11;S    | :PG _G_A:   | 7   |    |  |
|    |   |   |     |   | OR=1.609                  | T:P 45,3,0: |     |    |  |
|    |   |   |     |   |                           | ID: 1727    |     |    |  |
|    |   |   |     |   |                           | PL:         |     |    |  |
|    |   |   |     |   |                           | PS          |     |    |  |
|    |   |   |     |   |                           | GT          |     |    |  |
|    |   |   |     |   |                           | :A          |     |    |  |
| 17 | G | C | 35. | P | AC=2;AF=1.00;AN=2;DP=     | 1 1:0,1     |     |    |  |
| 96 |   |   | 48  | A | 1;ExcessHet=0.0000;FS=0.0 | GT :1:3:1   |     |    |  |
|    |   |   |     | S | 00;MLEAC=1;MLEAF=0.5      | :A 1:1769   |     |    |  |
|    |   |   |     | S | 00;MQ=60.00;QD=23.23;S    | D: _ATT     |     |    |  |
|    |   |   |     |   | OR=1.609                  | DP: GTTG    |     |    |  |
|    |   |   |     |   |                           | GQ AATC     | BF. | no |  |
|    |   |   |     |   |                           | :PG CTGT    | 7   |    |  |
|    |   |   |     |   |                           | T:P GGTA    |     |    |  |
|    |   |   |     |   |                           | ID: ATT_    |     |    |  |
|    |   |   |     |   |                           | PL: A:45,3  |     |    |  |
|    |   |   |     |   |                           | PS ,0:176   |     |    |  |
|    |   |   |     |   |                           | 9           |     |    |  |
| 17 | T | A | 35. | P | AC=2;AF=1.00;AN=2;DP=     | GT 1 1:0,1  |     |    |  |
| 98 |   |   | 48  | A | 1;ExcessHet=0.0000;FS=0.0 | :A :1:3:1   |     |    |  |
|    |   |   |     | S | 00;MLEAC=1;MLEAF=0.5      | D: 1:1769   | BF. | no |  |
|    |   |   |     | S |                           | DP: _ATT    | 7   |    |  |

|          |     |           |                  |                                                                                                                  |                                                                                                                                                                                                                                                                                                                                                                                                                                                                                                                                        |          |    |
|----------|-----|-----------|------------------|------------------------------------------------------------------------------------------------------------------|----------------------------------------------------------------------------------------------------------------------------------------------------------------------------------------------------------------------------------------------------------------------------------------------------------------------------------------------------------------------------------------------------------------------------------------------------------------------------------------------------------------------------------------|----------|----|
|          |     |           |                  | 00;MQ=60.00;QD=29.03;S<br>OR=1.609                                                                               | GQ GTTG<br>:PG AATC<br>T:P CTGT<br>ID: GGTA<br>PL: ATT_<br>PS A:45,3<br>0:176<br>9                                                                                                                                                                                                                                                                                                                                                                                                                                                     |          |    |
| 18<br>24 | C T | 78.<br>32 | P<br>A<br>S<br>S | AC=2;AF=1.00;AN=2;DP=<br>2;ExcessHet=0.0000;FS=0.0<br>00;MLEAC=1;MLEAF=0.5<br>00;MQ=60.00;QD=26.61;S<br>OR=0.693 | GT<br>:A<br>D: 1 1:0,2<br>DP: :2:6:1 <br>GQ 1:1824<br>:PG _C_T:<br>T:P 90,6,0:<br>ID: 1824<br>PL:<br>PS<br>GT<br>:A<br>D: 1 1:0,2<br>DP: :2:6:1 <br>GQ 1:1824<br>:PG _C_T:<br>T:P 90,6,0:<br>ID: 1824 | BF.<br>7 | no |
| 18<br>27 | G T | 78.<br>32 | P<br>A<br>S<br>S | AC=2;AF=1.00;AN=2;DP=<br>2;ExcessHet=0.0000;FS=0.0<br>00;MLEAC=1;MLEAF=0.5<br>00;MQ=60.00;QD=29.20;S<br>OR=0.693 |                                                                                                                                                                                                                                                                                                                                                                                                                                                                                                                                        | BF.<br>7 | no |
| 18<br>30 | A G | 78.<br>32 | P<br>A<br>S<br>S | AC=2;AF=1.00;AN=2;DP=<br>2;ExcessHet=0.0000;FS=0.0<br>00;MLEAC=1;MLEAF=0.5<br>00;MQ=60.00;QD=28.55;S<br>OR=0.693 |                                                                                                                                                                                                                                                                                                                                                                                                                                                                                                                                        | BF.<br>7 | no |
| 18<br>34 | T C | 78.<br>32 | P<br>A<br>S<br>S | AC=2;AF=1.00;AN=2;DP=<br>2;ExcessHet=0.0000;FS=0.0<br>00;MLEAC=1;MLEAF=0.5<br>00;MQ=60.00;QD=34.42;S<br>OR=0.693 |                                                                                                                                                                                                                                                                                                                                                                                                                                                                                                                                        | BF.<br>7 | no |

|    |   |   |     |   |                                                                                                                                                                     |                                                                                                                                                                                                                                                                                                                                               |          |     |
|----|---|---|-----|---|---------------------------------------------------------------------------------------------------------------------------------------------------------------------|-----------------------------------------------------------------------------------------------------------------------------------------------------------------------------------------------------------------------------------------------------------------------------------------------------------------------------------------------|----------|-----|
| 18 | A | G | 73. | P | AC=1;AF=0.500;AN=2;BaseQRankSum=-4.310e-01;DP=3;ExcessHet=0.0000;FS=0.000;MLEAC=1;MLEAF=0.500;MQ=60.00;MQRankSum=0.00;QD=24.55;ReadPosRankSum=-9.670e-01;SOR=0.223  | PL:<br>PS<br>GT<br>:A<br>D: 0 1:1,2<br>DP: :3:36:<br>GQ 0 1:18<br>:PG 24_C_<br>T:P T:81,0<br>ID: ,36:18<br>PL: 24<br>PS<br>GT<br>:A<br>D: 1 1:0,1<br>DP: :1:3:1 <br>GQ 1:1848<br>:PG _C_A:<br>T:P 45,3,0:<br>ID: 1848<br>PL:<br>PS<br>GT<br>:A<br>D: 1 1:0,1<br>DP: :1:3:1 <br>GQ 1:1848<br>:PG _C_A:<br>T:P 45,3,0:<br>ID: 1848<br>PL:<br>PS | BF.<br>7 | no  |
| 18 | C | A | 35. | P | AC=2;AF=1.00;AN=2;DP=3;ExcessHet=0.0000;FS=0.000;MLEAC=1;MLEAF=0.500;MQ=60.00;QD=28.53;SOR=1.609                                                                    | PL:<br>PS<br>GT<br>:A<br>D: 1 1:0,1<br>DP: :1:3:1 <br>GQ 1:1848<br>:PG _C_A:<br>T:P 45,3,0:<br>ID: 1848<br>PL:<br>PS<br>GT<br>:A<br>D: 1 1:0,1<br>DP: :1:3:1 <br>GQ 1:1848<br>:PG _C_A:<br>T:P 45,3,0:<br>ID: 1848<br>PL:<br>PS                                                                                                               | BF.<br>7 | no  |
| 18 | T | G | 35. | P | AC=2;AF=1.00;AN=2;DP=1;ExcessHet=0.0000;FS=0.000;MLEAC=1;MLEAF=0.500;MQ=60.00;QD=27.23;SOR=1.609                                                                    | PL:<br>PS<br>GT<br>:A<br>D: 1 1:0,1<br>DP: :1:3:1 <br>GQ 1:1848<br>:PG _C_A:<br>T:P 45,3,0:<br>ID: 1848<br>PL:<br>PS                                                                                                                                                                                                                          | BF.<br>7 | no  |
| 19 | C | T | 22  | P | AC=2;AF=1.00;AN=2;BaseQRankSum=-8.510e-01;DP=6012;ExcessHet=0.0000;FS=0.000;MLEAC=2;MLEAF=1.00;MQ=60.00;MQRankSum=-8.500e-02;QD=25.00;ReadPosRankSum=4.21;SOR=0.722 | GT 1/1:10<br>:A 2,5738<br>D: :5840:<br>DP: 99:220<br>GQ 926,13<br>:PL 503,0                                                                                                                                                                                                                                                                   | BF.<br>7 | yes |
| 21 | T | A | 35. | P | AC=2;AF=1.00;AN=2;DP=1;ExcessHet=0.0000;FS=0.000;MLEAC=1;MLEAF=0.500;MQ=60.00;QD=32.91;SOR=1.609                                                                    | GT 1 1:0,1<br>:A :1:3:1 <br>D: 1:2179<br>DP: _T_A:<br>GQ 45,3,0:<br>:PG 2179                                                                                                                                                                                                                                                                  | BF.<br>7 | no  |

|          |     |           |                  |                                                                                                                                                              |                                                                                                                                                                                                                                                                                                                                                                                                                                                                                                                                              |          |    |
|----------|-----|-----------|------------------|--------------------------------------------------------------------------------------------------------------------------------------------------------------|----------------------------------------------------------------------------------------------------------------------------------------------------------------------------------------------------------------------------------------------------------------------------------------------------------------------------------------------------------------------------------------------------------------------------------------------------------------------------------------------------------------------------------------------|----------|----|
| 21<br>80 | G A | 35.<br>48 | P<br>A<br>S<br>S | AC=2;AF=1.00;AN=2;DP=1;ExcessHet=0.0000;FS=0.000;MLEAC=1;MLEAF=0.500;MQ=60.00;QD=31.31;SOR=1.609                                                             | T:P<br>ID:<br>PL:<br>PS<br>GT<br>:A<br>D: 1 1:0,1<br>DP: :1:3:1 <br>GQ 1:2179<br>:PG _T_A:<br>T:P 45,3,0:<br>ID: 2179<br>PL:<br>PS<br>GT<br>:A<br>D: 0 1:12,<br>D: 3:15:4<br>DP: 9:0 1:2<br>GQ 359_T<br>:PG _C:49,<br>T:P 0,497:<br>ID: 2359<br>PL:<br>PS<br>GT 0 1:1,1<br>:A :2:39:<br>D: 0 1:24<br>DP: 22_G<br>GQ TGTG<br>:PG TTAA<br>T:P ATC_<br>ID: G:39,0<br>PL: ,39:24<br>PS 22<br>GT 0 1:1,1<br>:A :2:39:<br>D: 0 1:24<br>DP: 22_G<br>GQ TGTG<br>:PG TTAA<br>T:P ATC_<br>ID: G:39,0<br>PL: ,39:24<br>PS 22<br>GT 1 1:0,1<br>:A :1:3:1 | BF.<br>7 | no |
| 23<br>59 | T C | 41.<br>64 | P<br>A<br>S<br>S | AC=1;AF=0.500;AN=2;BaseQRankSum=2.83;DP=15;ExcessHet=0.0000;FS=6.990;MLEAC=1;MLEAF=0.500;MQ=60.00;MQRankSum=0.00;QD=2.78;ReadPosRankSum=-1.899e+00;SOR=2.807 | BF.<br>7                                                                                                                                                                                                                                                                                                                                                                                                                                                                                                                                     | no       |    |
| 24<br>38 | G C | 31.<br>64 | P<br>A<br>S<br>S | AC=1;AF=0.500;AN=2;BaseQRankSum=0.00;DP=2;ExcessHet=0.0000;FS=0.000;MLEAC=1;MLEAF=0.500;MQ=60.00;MQRankSum=0.00;QD=15.82;ReadPosRankSum=0.674;SOR=0.693      | BF.<br>7                                                                                                                                                                                                                                                                                                                                                                                                                                                                                                                                     | no       |    |
| 24<br>47 | G T | 31.<br>64 | P<br>A<br>S<br>S | AC=1;AF=0.500;AN=2;BaseQRankSum=0.00;DP=2;ExcessHet=0.0000;FS=0.000;MLEAC=1;MLEAF=0.500;MQ=60.00;MQRankSum=0.00;QD=15.82;ReadPosRankSum=0.674;SOR=0.693      | BF.<br>7                                                                                                                                                                                                                                                                                                                                                                                                                                                                                                                                     | no       |    |
| 24<br>51 | T C | 35.<br>48 | P<br>A           | AC=2;AF=1.00;AN=2;DP=1;ExcessHet=0.0000;FS=0.0                                                                                                               | BF.<br>7                                                                                                                                                                                                                                                                                                                                                                                                                                                                                                                                     | no       |    |



|    |   |     |   |                           |     |         |     |     |
|----|---|-----|---|---------------------------|-----|---------|-----|-----|
|    |   |     | S | 00;MLEAC=1;MLEAF=0.5      | D:  | 1:2422  |     |     |
|    |   |     | S | 00;MQ=60.00;QD=33.27;S    | DP: | _GTG    |     |     |
|    |   |     |   | OR=1.609                  | GQ  | TGTT    |     |     |
|    |   |     |   |                           | :PG | AAAT    |     |     |
|    |   |     |   |                           | T:P | C_G:4   |     |     |
|    |   |     |   |                           | ID: | 5,3,0:2 |     |     |
|    |   |     |   |                           | PL: | 422     |     |     |
|    |   |     |   |                           | PS  |         |     |     |
|    |   |     |   |                           | GT  |         |     |     |
|    |   |     |   |                           | :A  | 1 1:0,1 |     |     |
|    |   |     |   |                           | D:  | :1:3:1  |     |     |
|    |   |     | P | AC=2;AF=1.00;AN=2;DP=     | DP: | 1:2489  |     |     |
| 24 | A | C   | A | 1;ExcessHet=0.0000;FS=0.0 | GQ  | _T_T    | BF. | no  |
| 93 |   |     | S | 00;MLEAC=1;MLEAF=0.5      | :PG | ACCA    | 7   |     |
|    |   | 35. | S | 00;MQ=60.00;QD=29.09;S    | T:P | TCA:4   |     |     |
|    |   | 48  | S | OR=1.609                  | ID: | 5,3,0:2 |     |     |
|    |   |     |   |                           | PL: | 489     |     |     |
|    |   |     |   |                           | PS  |         |     |     |
|    |   |     |   | AC=2;AF=1.00;AN=2;Base    | GT  | 1/1:1,  |     |     |
|    |   |     |   | QRankSum=-4.500e-         | :A  | 5117:5  |     |     |
| 27 |   | 20  | P | 01;DP=5388;ExcessHet=0.0  | D:  | 118:99  | BF. | yes |
| 90 | C | 13  | A | 000;FS=0.000;MLEAC=2;     | DP: | :20138  | 7   |     |
|    |   | 70. | S | MLEAF=1.00;MQ=60.00;M     | GQ  | 4,1553  |     |     |
|    |   | 1   | S | QRankSum=0.622;QD=29.5    | :PL | 3,0     |     |     |
|    |   |     |   | 6;ReadPosRankSum=1.27;S   |     |         |     |     |
|    |   |     |   | OR=0.266                  |     |         |     |     |
|    |   |     |   |                           |     | 1 1:0,1 |     |     |
|    |   |     |   |                           | GT  | :1:3:1  |     |     |
|    |   |     |   |                           | :A  | 1:2817  |     |     |
|    |   |     |   |                           | D:  | _A_A    |     |     |
|    |   |     | P | AC=2;AF=1.00;AN=2;DP=     | DP: | AAA     |     |     |
| 28 | C | 35. | A | 1;ExcessHet=0.0000;FS=0.0 | GQ  | GAA     | BF. | no  |
| 22 |   | 48  | S | 00;MLEAC=1;MLEAF=0.5      | :PG | AAC     | 7   |     |
|    |   |     | S | 00;MQ=60.00;QD=33.85;S    | T:P | AGAT    |     |     |
|    |   |     |   | OR=1.609                  | ID: | ATAT    |     |     |
|    |   |     |   |                           | PL: | GTGA    |     |     |
|    |   |     |   |                           | PS  | GC:45   |     |     |
|    |   |     |   |                           |     | ,3,0:28 |     |     |
|    |   |     |   |                           |     | 17      |     |     |
|    |   |     |   |                           | GT  | 1 1:0,1 |     |     |
|    |   |     | P | AC=2;AF=1.00;AN=2;DP=     | :A  | :1:3:1  |     |     |
| 28 | T | 35. | A | 1;ExcessHet=0.0000;FS=0.0 | D:  | 1:2817  |     |     |
| 23 |   | 48  | S | 00;MLEAC=1;MLEAF=0.5      | DP: | _A_A    | BF. | no  |
|    |   |     | S | 00;MQ=60.00;QD=27.08;S    | GQ  | AAA     | 7   |     |
|    |   |     |   | OR=1.609                  | :PG | GAA     |     |     |
|    |   |     |   |                           | T:P | AAC     |     |     |

|    |     |     |   |                           |             |     |     |
|----|-----|-----|---|---------------------------|-------------|-----|-----|
|    |     |     |   |                           | ID: AGAT    |     |     |
|    |     |     |   |                           | PL: ATAT    |     |     |
|    |     |     |   |                           | PS GTGA     |     |     |
|    |     |     |   |                           | GC:45       |     |     |
|    |     |     |   |                           | ,3,0:28     |     |     |
|    |     |     |   |                           | 17          |     |     |
| 30 |     | 22  | P | AC=2;AF=1.00;AN=2;DP=     | GT 1/1:0,   |     |     |
| 37 | C T | 96  | A | 6036;ExcessHet=0.0000;FS  | :A 5808:5   |     |     |
|    |     | 01. | S | =0.000;MLEAC=2;MLEAF      | D: 811:99   | BF. | yes |
|    |     | 1   | S | =1.00;MQ=60.00;QD=30.62   | DP: :22961  | 7   |     |
|    |     |     |   | ;SOR=0.759                | GQ 5,1733   |     |     |
|    |     |     |   | AC=1;AF=0.500;AN=2;Bas    | :PL 4,0     |     |     |
|    |     |     |   | eQRankSum=-               | GT 0/1:10   |     |     |
| 33 |     | 17  | P | 1.055e+00;DP=189;Excess   | :A 2,82:1   |     |     |
| 15 | C T | 66. | A | Het=0.0000;FS=0.000;MLE   | D: 84:99:   | BF. | no  |
|    |     | 64  | S | AC=1;MLEAF=0.500;MQ=      | DP: 1774,0  | 7   |     |
|    |     |     | S | 60.00;MQRankSum=0.00;Q    | GQ ,2479    |     |     |
|    |     |     |   | D=9.60;ReadPosRankSum=    | :PL         |     |     |
|    |     |     |   | 0.177;SOR=0.721           | GT          |     |     |
|    |     |     |   |                           | :A 1 1:0,1  |     |     |
|    |     |     |   |                           | D: :1:3:1   |     |     |
| 35 |     | 35. | P | AC=2;AF=1.00;AN=2;DP=     | DP: 1:3555  |     |     |
| 59 | A G | 48  | A | 1;ExcessHet=0.0000;FS=0.0 | GQ _T_T     | BF. | no  |
|    |     |     | S | 00;MLEAC=1;MLEAF=0.5      | :PG GAC     | 7   |     |
|    |     |     | S | 00;MQ=60.00;QD=29.33;S    | T:P ATCC    |     |     |
|    |     |     |   | OR=1.609                  | ID: C:45,3  |     |     |
|    |     |     |   |                           | PL: ,0:355  |     |     |
|    |     |     |   |                           | PS 5        |     |     |
|    |     |     |   | AC=2;AF=1.00;AN=2;Base    | GT          |     |     |
|    |     |     |   | QRankSum=0.514;DP=21;E    | :A 1/1:1,   |     |     |
| 35 |     | 44  | P | xcessHet=0.0000;FS=3.245; | D: 18:19:   | BF. | no  |
| 71 | T A | 0.0 | A | MLEAC=2;MLEAF=1.00;       | DP: 32:454  | 7   |     |
|    |     | 6   | S | MQ=60.00;MQRankSum=0.     | GQ ,32,0    |     |     |
|    |     |     | S | 00;QD=23.16;ReadPosRank   | :PL         |     |     |
|    |     |     |   | Sum=-                     | GT          |     |     |
|    |     |     |   | 1.195e+00;SOR=0.556       | :A 1 1:0,1  |     |     |
|    |     |     |   |                           | D: :1:3:1   |     |     |
| 36 |     | 35. | P | AC=2;AF=1.00;AN=2;DP=     | DP: 1:3614  | BF. | no  |
| 14 | G C | 48  | A | 1;ExcessHet=0.0000;FS=0.0 | GQ _G_C:    | 7   |     |
|    |     |     | S | 00;MLEAC=1;MLEAF=0.5      | :PG 45,3,0: |     |     |
|    |     |     | S | 00;MQ=60.00;QD=35.36;S    | T:P 3614    |     |     |
|    |     |     |   | OR=1.609                  | ID:         |     |     |

|    |   |   |     |   |                           |             |     |    |  |
|----|---|---|-----|---|---------------------------|-------------|-----|----|--|
| 36 | A | T | 35. | P | AC=2;AF=1.00;AN=2;DP=     | PL:         |     |    |  |
| 35 |   |   | 48  | A | 1;ExcessHet=0.0000;FS=0.0 | PS          |     |    |  |
|    |   |   |     | S | 00;MLEAC=1;MLEAF=0.5      | GT          |     |    |  |
|    |   |   |     | S | 00;MQ=60.00;QD=27.00;S    | :A          |     |    |  |
|    |   |   |     |   | OR=1.609                  | D: 1 1:0,1  |     |    |  |
|    |   |   |     |   |                           | DP: :1:3:1  |     |    |  |
|    |   |   |     |   |                           | GQ 1:3635   | BF. |    |  |
|    |   |   |     |   |                           | :PG _A_T:   | 7   | no |  |
|    |   |   |     |   |                           | T:P 45,3,0: |     |    |  |
|    |   |   |     |   |                           | ID: 3635    |     |    |  |
|    |   |   |     |   |                           | PL:         |     |    |  |
|    |   |   |     |   |                           | PS          |     |    |  |
|    |   |   |     |   |                           | GT          |     |    |  |
|    |   |   |     |   |                           | :A          |     |    |  |
|    |   |   |     |   |                           | D: 1 1:0,1  |     |    |  |
|    |   |   |     |   |                           | DP: :1:3:1  |     |    |  |
|    |   |   |     |   |                           | GQ 1:3635   | BF. |    |  |
|    |   |   |     |   |                           | :PG _A_T:   | 7   | no |  |
|    |   |   |     |   |                           | T:P 45,3,0: |     |    |  |
|    |   |   |     |   |                           | ID: 3635    |     |    |  |
|    |   |   |     |   |                           | PL:         |     |    |  |
|    |   |   |     |   |                           | PS          |     |    |  |
|    |   |   |     |   |                           | GT          |     |    |  |
|    |   |   |     |   |                           | :A          |     |    |  |
|    |   |   |     |   |                           | D: 1 1:0,1  |     |    |  |
|    |   |   |     |   |                           | DP: :1:3:1  |     |    |  |
|    |   |   |     |   |                           | GQ 1:3635   | BF. |    |  |
|    |   |   |     |   |                           | :PG _A_T:   | 7   | no |  |
|    |   |   |     |   |                           | T:P 45,3,0: |     |    |  |
|    |   |   |     |   |                           | ID: 3635    |     |    |  |
|    |   |   |     |   |                           | PL:         |     |    |  |
|    |   |   |     |   |                           | PS          |     |    |  |
|    |   |   |     |   |                           | GT          |     |    |  |
|    |   |   |     |   |                           | :A          |     |    |  |
|    |   |   |     |   |                           | D: 1 1:0,1  |     |    |  |
|    |   |   |     |   |                           | DP: :1:3:1  |     |    |  |
|    |   |   |     |   |                           | GQ 1:3635   | BF. |    |  |
|    |   |   |     |   |                           | :PG _A_T:   | 7   | no |  |
|    |   |   |     |   |                           | T:P 45,3,0: |     |    |  |
|    |   |   |     |   |                           | ID: 3635    |     |    |  |
|    |   |   |     |   |                           | PL:         |     |    |  |
|    |   |   |     |   |                           | PS          |     |    |  |
|    |   |   |     |   |                           | GT          |     |    |  |
|    |   |   |     |   |                           | :A          |     |    |  |
|    |   |   |     |   |                           | D: 0/1:12   |     |    |  |
|    |   |   |     |   |                           | :A ,4:16:   | BF. |    |  |
|    |   |   |     |   |                           | D: 51:51,   | 7   | no |  |
|    |   |   |     |   |                           | DP: 0,283   |     |    |  |

|          |     |           |                                                                                                                                      |                                                                                                                                                                                                                                |          |    |
|----------|-----|-----------|--------------------------------------------------------------------------------------------------------------------------------------|--------------------------------------------------------------------------------------------------------------------------------------------------------------------------------------------------------------------------------|----------|----|
|          |     |           | EAF=0.500;MQ=60.00;MQ<br>RankSum=0.00;QD=2.73;R<br>eadPosRankSum=1.06;SOR<br>=0.446                                                  | GQ<br>:PL                                                                                                                                                                                                                      |          |    |
| 37<br>16 | G A | 78.<br>32 | P<br>A<br>S<br>S<br>AC=2;AF=1.00;AN=2;DP=<br>2;ExcessHet=0.0000;FS=0.0<br>00;MLEAC=1;MLEAF=0.5<br>00;MQ=60.00;QD=31.54;S<br>OR=0.693 | GT<br>:A<br>D: 1 1:0,2<br>DP: :2:6:1 <br>GQ 1:3716<br>:PG _G_A:<br>T:P 90,6,0:<br>ID: 3716<br>PL:<br>PS<br>GT<br>:A 1 1:0,1<br>D: :1:3:1 <br>DP: 1:3758<br>GQ _T_T<br>:PG CTCG<br>T:P GCTG<br>ID: G:45,3<br>PL: ,0:375<br>PS 8 | BF.<br>7 | no |
| 37<br>62 | T C | 35.<br>48 | P<br>A<br>S<br>S<br>AC=2;AF=1.00;AN=2;DP=<br>1;ExcessHet=0.0000;FS=0.0<br>00;MLEAC=1;MLEAF=0.5<br>00;MQ=60.00;QD=31.11;S<br>OR=1.609 | GT<br>:A 1 1:0,1<br>D: :1:3:1 <br>DP: 1:3758<br>GQ _T_T<br>:PG CTCG<br>T:P GCTG<br>ID: G:45,3<br>PL: ,0:375<br>PS 8                                                                                                            | BF.<br>7 | no |
| 37<br>65 | A T | 35.<br>48 | P<br>A<br>S<br>S<br>AC=2;AF=1.00;AN=2;DP=<br>1;ExcessHet=0.0000;FS=0.0<br>00;MLEAC=1;MLEAF=0.5<br>00;MQ=60.00;QD=34.66;S<br>OR=1.609 | GT<br>:A 1 1:0,1<br>D: :1:3:1 <br>DP: 1:3758<br>GQ _T_T<br>:PG CTCG<br>T:P GCTG<br>ID: G:45,3<br>PL: ,0:375<br>PS 8                                                                                                            | BF.<br>7 | no |
| 37<br>66 | T G | 35.<br>48 | P<br>A<br>S<br>S<br>AC=2;AF=1.00;AN=2;DP=<br>1;ExcessHet=0.0000;FS=0.0<br>00;MLEAC=1;MLEAF=0.5<br>00;MQ=60.00;QD=29.40;S<br>OR=1.609 | GT<br>:A 1 1:0,1<br>D: :1:3:1 <br>DP: 1:3758<br>GQ _T_T<br>:PG CTCG<br>T:P GCTG<br>ID: G:45,3<br>PL: ,0:375<br>PS 8                                                                                                            | BF.<br>7 | no |
| 37<br>67 | A G | 35.<br>48 | P<br>A<br>AC=2;AF=1.00;AN=2;DP=<br>1;ExcessHet=0.0000;FS=0.0                                                                         | GT<br>:A 1 1:0,1<br>:A :1:3:1                                                                                                                                                                                                  | BF.<br>7 | no |

|    |   |   |     |                                |                           |         |        |     |     |
|----|---|---|-----|--------------------------------|---------------------------|---------|--------|-----|-----|
|    |   |   | S   | 00;MLEAC=1;MLEAF=0.5           | D:                        | 1:3758  |        |     |     |
|    |   |   | S   | 00;MQ=60.00;QD=36.76;SOR=1.609 | DP:                       | _T_T    |        |     |     |
|    |   |   |     |                                | GQ                        | CTCG    |        |     |     |
|    |   |   |     |                                | :PG                       | GCTG    |        |     |     |
|    |   |   |     |                                | T:P                       | G:45,3  |        |     |     |
|    |   |   |     |                                | ID:                       | ,0:375  |        |     |     |
|    |   |   |     |                                | PL:                       | 8       |        |     |     |
|    |   |   |     |                                | PS                        |         |        |     |     |
|    |   |   |     |                                | GT                        |         |        |     |     |
|    |   |   |     |                                | :A                        | 0 1:1,1 |        |     |     |
|    |   |   |     | AC=1;AF=0.500;AN=2;DP          | D:                        | :2:39:  |        |     |     |
|    |   |   | P   | =2;ExcessHet=0.0000;FS=0.      | DP:                       | 0 1:38  |        |     |     |
| 38 | C | A | 31. | A                              | 000;MLEAC=1;MLEAF=0.      | GQ      | 18_A_  | BF. | no  |
| 21 |   |   | 64  | S                              | 500;MQ=60.00;MQRankSu     | :PG     | AATC   | 7   |     |
|    |   |   |     | S                              | m=0.00;QD=15.82;SOR=0.    | T:P     | T:39,0 |     |     |
|    |   |   |     |                                | 693                       | ID:     | ,39:38 |     |     |
|    |   |   |     |                                |                           | PL:     | 18     |     |     |
|    |   |   |     |                                |                           | PS      |        |     |     |
|    |   |   |     |                                | AC=2;AF=1.00;AN=2;Base    | GT      |        |     |     |
|    |   |   |     |                                | QRankSum=0.00;DP=21;Ex    | :A      | 1/1:1, |     |     |
| 40 | T | C | 45  | P                              | cessHet=0.0000;FS=0.000;  | D:      | 20:21: | BF. | no  |
| 57 |   |   | 6.0 | A                              | MLEAC=2;MLEAF=1.00;       | DP:     | 38:470 | 7   |     |
|    |   |   | 6   | S                              | MQ=60.00;MQRankSum=0.     | GQ      | ,38,0  |     |     |
|    |   |   |     | S                              | 00;QD=21.72;ReadPosRank   | :PL     |        |     |     |
|    |   |   |     |                                | Sum=-                     |         |        |     |     |
|    |   |   |     |                                | 1.079e+00;SOR=0.223       |         |        |     |     |
|    |   |   |     |                                | AC=2;AF=1.00;AN=2;Base    | GT      | 1/1:30 |     |     |
|    |   |   |     |                                | QRankSum=0.721;DP=4035    | :A      | 6,3563 |     |     |
| 41 | T | C | 10  | P                              | ;ExcessHet=0.0000;FS=0.00 | D:      | :3869: | BF. | no  |
| 20 |   |   | 65  | A                              | 0;MLEAC=2;MLEAF=1.00;     | DP:     | 99:106 | 7   |     |
|    |   |   | 93. | S                              | MQ=60.00;MQRankSum=0.     | GQ      | 607,17 |     |     |
|    |   |   | 1   | S                              | 00;QD=27.55;ReadPosRank   | :PL     | 06,0   |     |     |
|    |   |   |     |                                | Sum=2.69;SOR=0.597        |         |        |     |     |
|    |   |   |     |                                | AC=2;AF=1.00;AN=2;Base    | GT      | 1/1:31 |     |     |
|    |   |   |     |                                | QRankSum=-                | :A      | ,2980: |     |     |
| 41 | G | A | 20  | P                              | 1.870e+00;DP=5580;Excess  | D:      | 3027:9 | BF. | yes |
| 84 |   |   | 66  | A                              | Het=0.0000;FS=0.000;MLE   | DP:     | 9:2066 | 7   |     |
|    |   |   | 78. | S                              | AC=2;MLEAF=1.00;MQ=6      | GQ      | 92,147 |     |     |
|    |   |   | 1   | S                              | 0.00;MQRankSum=0.00;QD    | :PL     | 84,0   |     |     |
|    |   |   |     |                                | =28.17;ReadPosRankSum=3   |         |        |     |     |
|    |   |   |     |                                | .82;SOR=0.028             |         |        |     |     |
|    |   |   |     |                                | AC=2;AF=1.00;AN=2;Base    | GT      | 1/1:25 |     |     |
| 43 | C | T | 20  | P                              | QRankSum=1.43;DP=5569;    | :A      | ,5383: | BF. | yes |
| 21 |   |   | 57  | A                              | ExcessHet=0.0000;FS=0.00  | D:      | 5408:9 | 7   |     |
|    |   |   | 51. | S                              | 0;MLEAC=2;MLEAF=1.00;     | DP:     | 9:2057 |     |     |
|    |   |   | 1   | S                              | MQ=60.00;MQRankSum=-      |         |        |     |     |

|          |     |                      |                  |  |                                                                                                                                                                   |                                                                                                                                                                                                                                                                                                                                                                                                                                                              |          |     |
|----------|-----|----------------------|------------------|--|-------------------------------------------------------------------------------------------------------------------------------------------------------------------|--------------------------------------------------------------------------------------------------------------------------------------------------------------------------------------------------------------------------------------------------------------------------------------------------------------------------------------------------------------------------------------------------------------------------------------------------------------|----------|-----|
|          |     |                      |                  |  | 1.460e-01;QD=26.80;ReadPosRankSum=7.94;SOR=0.769                                                                                                                  | GQ 65,154<br>:PL 49,0                                                                                                                                                                                                                                                                                                                                                                                                                                        |          |     |
| 49<br>01 | C T | 35.<br>48            | P<br>A<br>S<br>S |  | AC=2;AF=1.00;AN=2;DP=1;ExcessHet=0.0000;FS=0.00;MLEAC=1;MLEAF=0.50;MQ=60.00;QD=34.17;SOR=1.609                                                                    | GT<br>:A<br>D: 1 1:0,1<br>DP: :1:3:1 <br>GQ 1:4901<br>:PG _C_T:<br>T:P 45,3,0:<br>ID: 4901<br>PL:<br>PS<br>GT<br>:A<br>D: 1 1:0,1<br>DP: :1:3:1 <br>GQ 1:4901<br>:PG _C_T:<br>T:P 45,3,0:<br>ID: 4901<br>PL:<br>PS<br>GT<br>:A<br>D: 1 1:0,1<br>DP: :1:3:1 <br>GQ 1:4901<br>:PG _C_T:<br>T:P 45,3,0:<br>ID: 4901<br>PL:<br>PS<br>GT 0 1:9,2<br>:A :11:57<br>D: :0 1:53<br>DP: 25_A_<br>GQ AATT<br>:PG ACTT<br>T:P GCA<br>ID: AT:57<br>PL: ,0,372:<br>PS 5325 | BF.<br>7 | no  |
| 49<br>05 | A C | 35.<br>48            | P<br>A<br>S<br>S |  | AC=2;AF=1.00;AN=2;DP=1;ExcessHet=0.0000;FS=0.00;MLEAC=1;MLEAF=0.50;MQ=60.00;QD=28.60;SOR=1.609                                                                    | GT 0 1:9,2<br>:A :11:57<br>D: :0 1:53<br>DP: 25_A_<br>GQ AATT<br>:PG ACTT<br>T:P GCA<br>ID: AT:57<br>PL: ,0,372:<br>PS 5325                                                                                                                                                                                                                                                                                                                                  | BF.<br>7 | no  |
| 53<br>30 | A C | 49.<br>64            | P<br>A<br>S<br>S |  | AC=1;AF=0.500;AN=2;BaseQRankSum=-2.300e-01;DP=11;ExcessHet=0.000;FS=0.000;MLEAC=1;MLEAF=0.500;MQ=60.00;MQRankSum=0.00;QD=4.51;ReadPosRankSum=-2.362e+00;SOR=0.527 | GT 1/1:3,<br>:A 5540:5<br>D: 549:99<br>DP: :22507<br>GQ 3,1674<br>:PL 8,0                                                                                                                                                                                                                                                                                                                                                                                    | BF.<br>7 | no  |
| 55<br>12 | C T | 22<br>50<br>59.<br>1 | P<br>A<br>S<br>S |  | AC=2;AF=1.00;AN=2;BaseQRankSum=-3.600e-01;DP=5811;ExcessHet=0.000;FS=0.000;MLEAC=2;MLEAF=1.00;MQ=60.00;MQRankSum=0.00;QD=26.80;ReadPosRankSum=1.54;SOR=0.664      | GT 0/1:65<br>:A ,37:10<br>D: 2:99:7<br>DP: 61,0,1<br>ID: 355                                                                                                                                                                                                                                                                                                                                                                                                 | BF.<br>7 | yes |
| 56<br>28 | C T | 75<br>3.6<br>4       | P<br>A<br>S<br>S |  | AC=1;AF=0.500;AN=2;BaseQRankSum=2.72;DP=106;ExcessHet=0.0000;FS=0.772;MLEAC=1;MLEAF=0.500;MQ=60.00;MQRankSum=                                                     |                                                                                                                                                                                                                                                                                                                                                                                                                                                              | BF.<br>7 | no  |

|    |   |   |     |   |   |                                                                                                                                                         |     |     |         |         |     |
|----|---|---|-----|---|---|---------------------------------------------------------------------------------------------------------------------------------------------------------|-----|-----|---------|---------|-----|
| 56 | A | T | 73. |   |   | 0.00;QD=7.39;ReadPosRankSum=-1.250e-01;SOR=0.665                                                                                                        | GQ  |     |         |         |     |
| 95 |   |   | 64  | P | A | AC=1;AF=0.500;AN=2;BaseQRankSum=0.00;DP=3;ExcessHet=0.0000;FS=0.000;MLEAC=1;MLEAF=0.500;MQ=60.00;MQRankSum=0.00;QD=24.55;ReadPosRankSum=0.967;SOR=0.223 | :PL | GT  | :A      | 0 1:1,2 |     |
|    |   |   |     | S | S |                                                                                                                                                         |     | D:  | :3:36:  |         |     |
|    |   |   |     |   |   |                                                                                                                                                         |     | DP: | 0 1:56  | BF.     | no  |
|    |   |   |     |   |   |                                                                                                                                                         |     | GQ  | 95_A_   | 7       |     |
|    |   |   |     |   |   |                                                                                                                                                         |     | :PG | T:81,0  |         |     |
|    |   |   |     |   |   |                                                                                                                                                         |     | T:P | ,36:56  |         |     |
|    |   |   |     |   |   |                                                                                                                                                         |     | ID: | 95      |         |     |
|    |   |   |     |   |   |                                                                                                                                                         |     | PL: |         |         |     |
|    |   |   |     |   |   |                                                                                                                                                         |     | PS  |         |         |     |
|    |   |   |     |   |   |                                                                                                                                                         |     | GT  |         |         |     |
|    |   |   |     |   |   |                                                                                                                                                         |     | :A  | 0 1:1,2 |         |     |
|    |   |   |     |   |   |                                                                                                                                                         |     | D:  | :3:36:  |         |     |
|    |   |   |     |   |   |                                                                                                                                                         |     | DP: | 0 1:56  | BF.     | no  |
|    |   |   |     |   |   |                                                                                                                                                         |     | GQ  | 95_A_   | 7       |     |
|    |   |   |     |   |   |                                                                                                                                                         |     | :PG | T:81,0  |         |     |
|    |   |   |     |   |   |                                                                                                                                                         |     | T:P | ,36:56  |         |     |
|    |   |   |     |   |   |                                                                                                                                                         |     | ID: | 95      |         |     |
|    |   |   |     |   |   |                                                                                                                                                         |     | PL: |         |         |     |
|    |   |   |     |   |   |                                                                                                                                                         |     | PS  |         |         |     |
|    |   |   |     |   |   |                                                                                                                                                         |     | GT  |         |         |     |
|    |   |   |     |   |   |                                                                                                                                                         |     | :A  | 1/1:1,  |         |     |
|    |   |   |     |   |   |                                                                                                                                                         |     | D:  | 3954:4  |         |     |
|    |   |   |     |   |   |                                                                                                                                                         |     | DP: | 052:99  | BF.     | yes |
|    |   |   |     |   |   |                                                                                                                                                         |     | GQ  | :22405  | 7       |     |
|    |   |   |     |   |   |                                                                                                                                                         |     | :PL | 4,1718  |         |     |
|    |   |   |     |   |   |                                                                                                                                                         |     |     | 2,0     |         |     |
|    |   |   |     |   |   |                                                                                                                                                         |     | GT  |         |         |     |
|    |   |   |     |   |   |                                                                                                                                                         |     | :A  | 0 1:4,4 |         |     |
|    |   |   |     |   |   |                                                                                                                                                         |     | D:  | :8:99:  |         |     |
|    |   |   |     |   |   |                                                                                                                                                         |     | DP: | 0 1:62  | BF.     | no  |
|    |   |   |     |   |   |                                                                                                                                                         |     | GQ  | 66_G_   | 7       |     |
|    |   |   |     |   |   |                                                                                                                                                         |     | :PG | GA:11   |         |     |
|    |   |   |     |   |   |                                                                                                                                                         |     | T:P | 5,0,15  |         |     |
|    |   |   |     |   |   |                                                                                                                                                         |     | ID: | 6:6266  |         |     |
|    |   |   |     |   |   |                                                                                                                                                         |     | PL: |         |         |     |
|    |   |   |     |   |   |                                                                                                                                                         |     | PS  |         |         |     |
|    |   |   |     |   |   |                                                                                                                                                         |     | GT  | 0 1:5,4 |         |     |
|    |   |   |     |   |   |                                                                                                                                                         |     | :A  | :9:99:  |         |     |
|    |   |   |     |   |   |                                                                                                                                                         |     | D:  | 0 1:64  | BF.     | no  |
|    |   |   |     |   |   |                                                                                                                                                         |     | DP: | 04_G_   | 7       |     |
|    |   |   |     |   |   |                                                                                                                                                         |     | GQ  | T:153,  |         |     |

|    |   |   |     |                          |                        |         |     |    |
|----|---|---|-----|--------------------------|------------------------|---------|-----|----|
|    |   |   |     | ankSum=0.00;QD=16.18;Re  | :PG                    | 0,198:  |     |    |
|    |   |   |     | adPosRankSum=-           | T:P                    | 6404    |     |    |
|    |   |   |     | 1.803e+00;SOR=0.446      | ID:                    |         |     |    |
|    |   |   |     |                          | PL:                    |         |     |    |
|    |   |   |     |                          | PS                     |         |     |    |
|    |   |   |     |                          | GT                     |         |     |    |
|    |   |   |     | AC=1;AF=0.500;AN=2;Bas   | :A                     |         |     |    |
|    |   |   |     | eQRankSum=-5.890e-       | D:                     | 0 1:8,4 |     |    |
|    |   |   |     | 01;DP=12;ExcessHet=0.000 | DP:                    | :12:99  |     |    |
| 64 | T | G | 13  | P                        | 01;FS=0.000;MLEAC=1;ML | :0 1:64 |     |    |
| 07 |   |   | 6.6 | A                        | EAF=0.500;MQ=60.00;MQ  | GQ      | BF. | no |
|    |   |   | 4   | S                        | RankSum=0.00;QD=11.39; | :PG     | 7   |    |
|    |   |   |     | S                        | ReadPosRankSum=-       | T:144,  |     |    |
|    |   |   |     |                          | 1.803e+00;SOR=0.368    | T:P     |     |    |
|    |   |   |     |                          |                        | ID:     |     |    |
|    |   |   |     |                          |                        | 6404    |     |    |
|    |   |   |     |                          |                        | PL:     |     |    |
|    |   |   |     |                          |                        | PS      |     |    |
|    |   |   |     |                          |                        | GT      |     |    |
|    |   |   |     | AC=1;AF=0.500;AN=2;Bas   | :A                     |         |     |    |
|    |   |   |     | eQRankSum=-7.990e-       | D:                     | 0 1:8,4 |     |    |
|    |   |   |     | 01;DP=12;ExcessHet=0.000 | DP:                    | :12:99  |     |    |
| 64 | A | T | 13  | P                        | 01;FS=0.000;MLEAC=1;ML | :0 1:64 |     |    |
| 11 |   |   | 6.6 | A                        | EAF=0.500;MQ=60.00;MQ  | GQ      | BF. | no |
|    |   |   | 4   | S                        | RankSum=0.00;QD=11.39; | :PG     | 7   |    |
|    |   |   |     | S                        | ReadPosRankSum=-       | T:144,  |     |    |
|    |   |   |     |                          | 1.169e+00;SOR=0.368    | T:P     |     |    |
|    |   |   |     |                          |                        | ID:     |     |    |
|    |   |   |     |                          |                        | 6404    |     |    |
|    |   |   |     |                          |                        | PL:     |     |    |
|    |   |   |     |                          |                        | PS      |     |    |
|    |   |   |     |                          |                        | GT      |     |    |
|    |   |   |     | AC=1;AF=0.500;AN=2;Bas   | :A                     |         |     |    |
|    |   |   |     | eQRankSum=-7.990e-       | D:                     | 0 1:8,4 |     |    |
|    |   |   |     | 01;DP=12;ExcessHet=0.000 | DP:                    | :12:99  |     |    |
| 64 | A | C | 13  | P                        | 01;FS=0.000;MLEAC=1;ML | :0 1:64 |     |    |
| 14 |   |   | 6.6 | A                        | EAF=0.500;MQ=60.00;MQ  | GQ      | BF. | no |
|    |   |   | 4   | S                        | RankSum=0.00;QD=11.39; | :PG     | 7   |    |
|    |   |   |     | S                        | ReadPosRankSum=-       | T:144,  |     |    |
|    |   |   |     |                          | 3.087e+00;SOR=0.368    | T:P     |     |    |
|    |   |   |     |                          |                        | ID:     |     |    |
|    |   |   |     |                          |                        | 6404    |     |    |
|    |   |   |     |                          |                        | PL:     |     |    |
|    |   |   |     |                          |                        | PS      |     |    |
|    |   |   |     |                          |                        | GT      |     |    |
|    |   |   |     | AC=1;AF=0.500;AN=2;Bas   | :A                     | :9:99:  |     |    |
|    |   |   |     | eQRankSum=-              | D:                     | 0 1:67  |     |    |
|    |   |   |     | 1.085e+00;DP=9;ExcessHet | DP:                    | 18_T_   |     |    |
| 67 | A | G | 14  | P                        | =0.0000;FS=0.000;MLEAC | GQ      | BF. | no |
| 29 |   |   | 5.6 | A                        | =1;MLEAF=0.500;MQ=60.  | TAGT    | 7   |    |
|    |   |   | 4   | S                        | 00;MQRankSum=0.00;QD=  | :PG     |     |    |
|    |   |   |     | S                        | 16.18;ReadPosRankSum=- | TGTA    |     |    |
|    |   |   |     |                          | 1.803e+00;SOR=0.446    | T:P     |     |    |
|    |   |   |     |                          |                        | CTA:1   |     |    |
|    |   |   |     |                          |                        | ID:     |     |    |
|    |   |   |     |                          |                        | 53,0,1  |     |    |
|    |   |   |     |                          |                        | PL:     |     |    |
|    |   |   |     |                          |                        | 98:671  |     |    |
|    |   |   |     |                          |                        | PS      |     |    |
|    |   |   |     |                          |                        | 8       |     |    |



|    |   |   |     |   |                           |     |         |     |     |
|----|---|---|-----|---|---------------------------|-----|---------|-----|-----|
| 67 | C | T | 37  | P | AC=2;AF=1.00;AN=2;Base    | GT  |         |     |     |
| 30 |   |   | 5.7 | A | QRankSum=0.514;DP=21;E    | :A  | 1/1:2,  |     |     |
|    |   |   | 4   | S | xcessHet=0.0000;FS=0.000; | D:  | 17:19:  | BF. | no  |
|    |   |   |     | S | MLEAC=1;MLEAF=0.500;      | DP: | 7:388,  | 7   |     |
|    |   |   |     | S | MQ=60.00;MQRankSum=0.     | GQ  | 7,0     |     |     |
|    |   |   |     | S | 00;QD=19.78;ReadPosRank   | :PL |         |     |     |
|    |   |   |     |   | Sum=-                     |     |         |     |     |
|    |   |   |     |   | 1.951e+00;SOR=0.804       |     |         |     |     |
| 67 | T | A | 47. | P | AC=1;AF=0.500;AN=2;DP     | GT  |         |     |     |
| 79 |   |   | 08  | A | =2;ExcessHet=0.0000;FS=0. | :A  | 0/1:0,  |     |     |
|    |   |   |     | S | 000;MLEAC=1;MLEAF=0.      | D:  | 1:2:14  | BF. | no  |
|    |   |   |     | S | 500;MQ=60.00;QD=30.36;S   | DP: | :39,0,1 | 7   |     |
|    |   |   |     | S | OR=0.693                  | GQ  | 4       |     |     |
|    |   |   |     |   |                           | :PL |         |     |     |
| 67 | A | G | 52. | P | AC=1;AF=0.500;AN=2;Bas    | GT  |         |     |     |
| 85 |   |   | 64  | A | eQRankSum=-8.440e-        | :A  | 0/1:22  |     |     |
|    |   |   |     | S | 01;DP=25;ExcessHet=0.000  | D:  | ,3:25:  | BF. | no  |
|    |   |   |     | S | 0;FS=0.000;MLEAC=1;ML     | DP: | 60:60,  | 7   |     |
|    |   |   |     | S | EAF=0.500;MQ=60.00;MQ     | GQ  | 0,889   |     |     |
|    |   |   |     | S | RankSum=0.00;QD=2.11;R    | :PL |         |     |     |
|    |   |   |     | S | eadPosRankSum=0.378;SO    |     |         |     |     |
|    |   |   |     |   | R=1.179                   |     |         |     |     |
| 68 | G | A | 12  | P | AC=1;AF=0.500;AN=2;Bas    | GT  | 0/1:37  |     |     |
| 50 |   |   | 81  | A | eQRankSum=1.27;DP=4752    | :A  | 87,738  |     |     |
|    |   |   | 0.6 | S | ;ExcessHet=0.0000;FS=1.53 | D:  | :4525:  | BF. | no  |
|    |   |   | 4   | S | 0;MQ=60.00;MQRankSum=     | DP: | 99:128  | 7   |     |
|    |   |   |     | S | 0.00;QD=2.83;ReadPosRan   | GQ  | 18,0,1  |     |     |
|    |   |   |     | S | kSum=-                    | :PL | 20599   |     |     |
|    |   |   |     |   | 5.467e+00;SOR=0.842       |     |         |     |     |
| 70 | G | A | 47  | P | AC=2;AF=1.00;AN=2;Base    | GT  | 1/1:2,  |     |     |
| 58 |   |   | 75. | A | QRankSum=0.696;DP=198;    | :A  | 172:17  |     |     |
|    |   |   | 06  | S | ExcessHet=0.0000;FS=0.00  | D:  | 4:99:4  | BF. | no  |
|    |   |   |     | S | 0;MLEAC=2;MLEAF=1.00;     | DP: | 789,47  | 7   |     |
|    |   |   |     | S | MQ=60.00;MQRankSum=0.     | GQ  | 2,0     |     |     |
|    |   |   |     | S | 00;QD=27.44;ReadPosRank   | :PL |         |     |     |
|    |   |   |     |   | Sum=-                     |     |         |     |     |
|    |   |   |     |   | 1.208e+00;SOR=0.693       |     |         |     |     |
| 75 | C | T | 23  | P | AC=2;AF=1.00;AN=2;Base    | GT  | 1/1:99  |     |     |
| 28 |   |   | 13  | A | QRankSum=0.838;DP=6152    | :A  | ,4495:  |     |     |
|    |   |   | 52. | S | ;ExcessHet=0.0000;FS=0.00 | D:  | 4606:9  | BF. | yes |
|    |   |   | 1   | S | 0;MLEAC=2;MLEAF=1.00;     | DP: | 9:2313  | 7   |     |
|    |   |   |     | S | MQ=60.00;MQRankSum=0.     | GQ  | 66,140  |     |     |
|    |   |   |     | S | 033;QD=26.00;ReadPosRan   | :PL | 88,0    |     |     |
|    |   |   |     | S | kSum=6.57;SOR=0.658       |     |         |     |     |

|          |        |                 |                  |                                                                                                                                                        |                                                                                                                                                                                                                                                                                                                                                                         |                                                                                 |          |     |
|----------|--------|-----------------|------------------|--------------------------------------------------------------------------------------------------------------------------------------------------------|-------------------------------------------------------------------------------------------------------------------------------------------------------------------------------------------------------------------------------------------------------------------------------------------------------------------------------------------------------------------------|---------------------------------------------------------------------------------|----------|-----|
| 77<br>82 | A<br>G | 25<br>02.<br>06 | P<br>A<br>S<br>S | AC=2;AF=1.00;AN=2;DP=90;ExcessHet=0.0000;FS=0.000;MLEAC=2;MLEAF=1.00;MQ=60.00;QD=29.44;SOR=0.979                                                       | GT<br>:A<br>D:<br>DP:<br>GQ<br>:PL<br>GT<br>:A<br>D:<br>DP:<br>GQ<br>:PG<br>T:P<br>ID:<br>PL:<br>PS<br>GT<br>:A<br>D:<br>DP:<br>GQ<br>:PG<br>T:P<br>ID:<br>PL:<br>PS<br>GT<br>:A<br>D:<br>DP:<br>GQ<br>:PG<br>T:P<br>ID:<br>PL:<br>PS<br>GT<br>:A<br>D:<br>DP:<br>GQ<br>:PG<br>T:P<br>ID:<br>PL:<br>PS<br>GT<br>:A<br>D:<br>DP:<br>GQ<br>:PG<br>T:P<br>ID:<br>PL:<br>PS | 1 1:0,<br>85:85:<br>99:251<br>6,254,<br>0                                       | BF.<br>7 | yes |
| 78<br>40 | C<br>A | 78.<br>32       | P<br>A<br>S<br>S | AC=2;AF=1.00;AN=2;DP=2;ExcessHet=0.0000;FS=0.000;MLEAC=1;MLEAF=0.500;MQ=60.00;QD=35.18;SOR=0.693                                                       | GT<br>:A<br>D:<br>DP:<br>GQ<br>:PG<br>T:P<br>ID:<br>PL:<br>PS<br>GT<br>:A<br>D:<br>DP:<br>GQ<br>:PG<br>T:P<br>ID:<br>PL:<br>PS<br>GT<br>:A<br>D:<br>DP:<br>GQ<br>:PG<br>T:P<br>ID:<br>PL:<br>PS<br>GT<br>:A<br>D:<br>DP:<br>GQ<br>:PG<br>T:P<br>ID:<br>PL:<br>PS                                                                                                        | 1 1:0,2<br>:2:6:1 <br>1:7831<br>_TA_<br>T:90,6<br>,0:783<br>1                   | BF.<br>7 | no  |
| 79<br>69 | T<br>A | 78.<br>32       | P<br>A<br>S<br>S | AC=2;AF=1.00;AN=2;DP=4;ExcessHet=0.0000;FS=0.000;MLEAC=1;MLEAF=0.500;MQ=60.00;QD=34.86;SOR=0.693                                                       | GT<br>:A<br>D:<br>DP:<br>GQ<br>:PG<br>T:P<br>ID:<br>PL:<br>PS<br>GT<br>:A<br>D:<br>DP:<br>GQ<br>:PG<br>T:P<br>ID:<br>PL:<br>PS<br>GT<br>:A<br>D:<br>DP:<br>GQ<br>:PG<br>T:P<br>ID:<br>PL:<br>PS<br>GT<br>:A<br>D:<br>DP:<br>GQ<br>:PG<br>T:P<br>ID:<br>PL:<br>PS                                                                                                        | 1 1:0,2<br>:2:6:1 <br>1:7969<br>_T_A:<br>90,6,0:<br>7969                        | BF.<br>7 | no  |
| 79<br>72 | A<br>C | 78.<br>32       | P<br>A<br>S<br>S | AC=2;AF=1.00;AN=2;DP=2;ExcessHet=0.0000;FS=0.000;MLEAC=1;MLEAF=0.500;MQ=60.00;QD=29.05;SOR=0.693                                                       | GT<br>:A<br>D:<br>DP:<br>GQ<br>:PG<br>T:P<br>ID:<br>PL:<br>PS<br>GT<br>:A<br>D:<br>DP:<br>GQ<br>:PG<br>T:P<br>ID:<br>PL:<br>PS<br>GT<br>:A<br>D:<br>DP:<br>GQ<br>:PG<br>T:P<br>ID:<br>PL:<br>PS                                                                                                                                                                         | 1 1:0,2<br>:2:6:1 <br>1:7969<br>_T_A:<br>90,6,0:<br>7969                        | BF.<br>7 | no  |
| 79<br>98 | C<br>A | 73.<br>64       | P<br>A<br>S<br>S | AC=1;AF=0.500;AN=2;BaseQRankSum=0.00;DP=3;ExcessHet=0.0000;FS=0.000;MLEAC=1;MLEAF=0.500;MQ=60.00;MQRankSum=0.00;QD=24.55;ReadPosRankSum=0.00;SOR=0.223 | GT<br>:A<br>D:<br>DP:<br>GQ<br>:PG<br>T:P<br>ID:<br>PL:<br>PS<br>GT<br>:A<br>D:<br>DP:<br>GQ<br>:PG<br>T:P<br>ID:<br>PL:<br>PS                                                                                                                                                                                                                                          | 0 1:1,2<br>:3:36:<br>0 1:79<br>96_G_<br>GGG<br>ATTG<br>GTT:8<br>1,0,36:<br>7996 | BF.<br>7 | no  |

|               |     |                      |                  |                                                                                                                                                                |                                                                                                                                                                                                                                                                                                                             |
|---------------|-----|----------------------|------------------|----------------------------------------------------------------------------------------------------------------------------------------------------------------|-----------------------------------------------------------------------------------------------------------------------------------------------------------------------------------------------------------------------------------------------------------------------------------------------------------------------------|
| 82<br>26      | G T | 78.<br>32            | P<br>A<br>S<br>S | AC=2;AF=1.00;AN=2;DP=2;ExcessHet=0.0000;FS=0.00;MLEAC=1;MLEAF=0.500;MQ=60.00;QD=30.31;SOR=0.693                                                                | GT<br>:A<br>D: 1 1:0,2<br>DP: :2:6:1 <br>GQ 1:8226 BF.<br>:PG _G_T: 7 no<br>T:P 90,6,0:<br>ID: 8226<br>PL:<br>PS<br>GT<br>:A<br>D: 1 1:0,2<br>DP: :2:6:1 <br>GQ 1:8226 BF.<br>:PG _G_T: 7 no<br>T:P 90,6,0:<br>ID: 8226<br>PL:<br>PS<br>GT 1/1:0,<br>:A 5322:5<br>D: 322:99 BF.<br>DP: :21670 7 yes<br>GQ 1,1600<br>:PL 6,0 |
| 82<br>27      | T A | 78.<br>32            | P<br>A<br>S<br>S | AC=2;AF=1.00;AN=2;DP=2;ExcessHet=0.0000;FS=0.00;MLEAC=1;MLEAF=0.500;MQ=60.00;QD=29.84;SOR=0.693                                                                | GT 1/1:15<br>:A ,5125:<br>D: 5140:9 BF.<br>DP: 9:2107 7 yes<br>GQ 55,149<br>:PL 00,0                                                                                                                                                                                                                                        |
| 93<br>44      | C T | 21<br>66<br>87.<br>1 | P<br>A<br>S<br>S | AC=2;AF=1.00;AN=2;DP=5481;ExcessHet=0.0000;FS=0.0000;MLEAC=2;MLEAF=1.00;MQ=60.00;QD=30.02;SOR=0.945                                                            | GT 1/1:2,<br>:A 5408:5 BF.<br>D: 415:99 7 yes<br>DP: :20955<br>GQ 6,1620<br>:PL 6,0                                                                                                                                                                                                                                         |
| 94<br>24      | A G | 21<br>07<br>41.<br>1 | P<br>A<br>S<br>S | AC=2;AF=1.00;AN=2;BaseQRankSum=0.984;DP=5328;ExcessHet=0.0000;FS=0.000;MLEAC=2;MLEAF=1.00;MQ=60.00;MQRankSum=-1.620e-01;QD=31.98;ReadPosRankSum=2.64;SOR=0.022 | GT 1/1:3,<br>:A 5696:5 BF.<br>D: 699:99 7 yes<br>DP: :22548                                                                                                                                                                                                                                                                 |
| 95<br>34      | C T | 20<br>95<br>42.<br>1 | P<br>A<br>S<br>S | AC=2;AF=1.00;AN=2;BaseQRankSum=1.48;DP=5597;ExcessHet=0.0000;FS=0.000;MLEAC=2;MLEAF=1.00;MQ=60.00;MQRankSum=0.00;QD=27.51;ReadPosRankSum=1.67;SOR=0.733        | GT 1/1:3,<br>:A 5696:5 BF.<br>D: 699:99 7 yes<br>DP: :22548                                                                                                                                                                                                                                                                 |
| 10<br>02<br>9 | C T | 22<br>54<br>66.<br>1 | P<br>A<br>S<br>S | AC=2;AF=1.00;AN=2;BaseQRankSum=-1.400e+00;DP=5887;ExcessHet=0.0000;FS=0.000;MLEAC=2;MLEAF=1.00;MQ=6                                                            | GT 1/1:3,<br>:A 5696:5 BF.<br>D: 699:99 7 yes<br>DP: :22548                                                                                                                                                                                                                                                                 |

|    |   |   |     |   |                           |     |         |     |  |     |
|----|---|---|-----|---|---------------------------|-----|---------|-----|--|-----|
| 10 |   |   |     |   | 0.00;MQRankSum=0.00;QD    | GQ  | 0,1699  |     |  |     |
| 16 | T | G | 73. |   | =29.11;ReadPosRankSum=1   | :PL | 6,0     |     |  |     |
| 2  |   |   | 64  | P | .78;SOR=0.398             |     |         |     |  |     |
|    |   |   |     | A | AC=1;AF=0.500;AN=2;Bas    | GT  |         |     |  |     |
|    |   |   |     | S | eQRankSum=0.00;DP=3;Ex    | :A  | 0 1:1,2 |     |  |     |
|    |   |   |     | S | cessHet=0.0000;FS=0.000;  | D:  | :3:36:  |     |  |     |
|    |   |   |     |   | MLEAC=1;MLEAF=0.500;      | DP: | 0 1:10  |     |  |     |
|    |   |   |     |   | MQ=60.00;MQRankSum=0.     | GQ  | 157_G   | BF. |  | no  |
|    |   |   |     |   | 00;QD=24.55;ReadPosRank   | :PG | TA_G    | 7   |  |     |
|    |   |   |     |   | Sum=0.967;SOR=0.223       | T:P | :81,0,3 |     |  |     |
|    |   |   |     |   |                           | ID: | 6:1015  |     |  |     |
|    |   |   |     |   |                           | PL: | 7       |     |  |     |
|    |   |   |     |   |                           | PS  |         |     |  |     |
| 10 |   |   | 23  | P | AC=2;AF=1.00;AN=2;Base    | GT  | 1/1:4,  |     |  |     |
| 19 | C | T | 45  | A | QRankSum=2.76;DP=6147;    | :A  | 5899:5  |     |  |     |
| 8  |   |   | 21. | S | ExcessHet=0.0000;FS=0.00  | D:  | 916:99  | BF. |  | yes |
|    |   |   | 1   | S | MQ=60.00;MQRankSum=-      | DP: | :23453  | 7   |  |     |
|    |   |   |     |   | 4.510e-                   | GQ  | 5,1763  |     |  |     |
|    |   |   |     |   | 01;QD=28.08;ReadPosRank   | :PL | 7,0     |     |  |     |
|    |   |   |     |   | Sum=2.91;SOR=0.965        |     |         |     |  |     |
| 10 |   |   | 25  | P | AC=2;AF=1.00;AN=2;DP=     | GT  | 1/1:1,  |     |  |     |
| 44 | G | A | 35  | A | 6092;ExcessHet=0.0000;FS  | :A  | 4318:4  |     |  |     |
| 7  |   |   | 75. | S | =0.000;MLEAC=2;MLEAF      | D:  | 435:99  | BF. |  | yes |
|    |   |   | 1   | S | =1.00;MQ=60.00;MQRankS    | DP: | :25358  | 7   |  |     |
|    |   |   |     |   | um=0.254;QD=23.23;SOR=    | GQ  | 9,1706  |     |  |     |
|    |   |   |     |   | 1.073                     | :PL | 9,0     |     |  |     |
| 10 |   |   | 25  | P | AC=2;AF=1.00;AN=2;Base    | GT  | 1/1:31  |     |  |     |
| 44 | C | A | 08  | A | QRankSum=-8.140e-         | :A  | ,4303:  |     |  |     |
| 9  |   |   | 68. | S | 01;DP=5839;ExcessHet=0.0  | D:  | 4339:9  | BF. |  | yes |
|    |   |   | 1   | S | 000;FS=0.000;MLEAC=2;     | DP: | 9:2508  | 7   |  |     |
|    |   |   |     |   | MLEAF=1.00;MQ=60.00;M     | GQ  | 82,157  |     |  |     |
|    |   |   |     |   | QRankSum=0.00;QD=29.03    | :PL | 20,0    |     |  |     |
|    |   |   |     |   | ;ReadPosRankSum=5.43;SO   |     |         |     |  |     |
|    |   |   |     |   | R=0.227                   |     |         |     |  |     |
| 10 |   |   | 57  | P | AC=2;AF=1.00;AN=2;Base    | GT  | 1/1:3,  |     |  |     |
| 61 | C | T | 71. | A | QRankSum=0.621;DP=234;    | :A  | 219:22  |     |  |     |
| 5  |   |   | 06  | S | ExcessHet=0.0000;FS=0.00  | D:  | 2:99:5  | BF. |  | yes |
|    |   |   |     | S | 0;MLEAC=2;MLEAF=1.00;     | DP: | 785,59  | 7   |  |     |
|    |   |   |     |   | MQ=60.00;MQRankSum=0.     | GQ  | 0,0     |     |  |     |
|    |   |   |     |   | 00;QD=26.00;ReadPosRank   | :PL |         |     |  |     |
|    |   |   |     |   | Sum=-                     |     |         |     |  |     |
|    |   |   |     |   | 2.708e+00;SOR=0.396       |     |         |     |  |     |
| 10 |   |   | 78. | P | AC=2;AF=1.00;AN=2;DP=     | GT  | 1 1:0,2 |     |  |     |
| 79 | T | A | 32  | A | 2;ExcessHet=0.0000;FS=0.0 | :A  | :2:6:1  | BF. |  | no  |
| 2  |   |   |     |   | 00;MLEAC=1;MLEAF=0.5      | D:  | 1:1078  | 7   |  |     |

|    |     |     |   |                           |             |     |    |
|----|-----|-----|---|---------------------------|-------------|-----|----|
|    |     |     | S | 00;MQ=60.00;QD=28.65;S    | DP: 7_G_    |     |    |
|    |     |     | S | OR=0.693                  | GQ GACC     |     |    |
|    |     |     |   |                           | :PG CCTT    |     |    |
|    |     |     |   |                           | T:P AC:90   |     |    |
|    |     |     |   |                           | ID: ,6,0:10 |     |    |
|    |     |     |   |                           | PL: 787     |     |    |
|    |     |     |   |                           | PS          |     |    |
|    |     |     |   |                           | GT          |     |    |
|    |     |     |   |                           | :A 1 1:0,2  |     |    |
|    |     |     |   |                           | :2:6:1      |     |    |
|    |     |     |   |                           | D: 1:1078   |     |    |
| 10 |     |     | P | AC=2;AF=1.00;AN=2;DP=     | DP: 7_G_    |     |    |
| 79 | T G | 78. | A | 2;ExcessHet=0.0000;FS=0.0 | GQ GACC     | BF. | no |
| 4  |     | 32  | S | 00;MLEAC=1;MLEAF=0.5      | :PG CCTT    | 7   |    |
|    |     |     | S | 00;MQ=60.00;QD=28.44;S    | T:P AC:90   |     |    |
|    |     |     |   | OR=0.693                  | ID: ,6,0:10 |     |    |
|    |     |     |   |                           | PL: 787     |     |    |
|    |     |     |   |                           | PS          |     |    |
|    |     |     |   |                           | GT          |     |    |
|    |     |     |   |                           | :A 1 1:0,2  |     |    |
|    |     |     |   |                           | :2:6:1      |     |    |
|    |     |     |   |                           | D: 1:1078   |     |    |
| 10 |     |     | P | AC=2;AF=1.00;AN=2;DP=     | DP: 7_G_    |     |    |
| 79 | C A | 78. | A | 2;ExcessHet=0.0000;FS=0.0 | GQ GACC     | BF. | no |
| 8  |     | 32  | S | 00;MLEAC=1;MLEAF=0.5      | :PG CCTT    | 7   |    |
|    |     |     | S | 00;MQ=60.00;QD=35.95;S    | T:P AC:90   |     |    |
|    |     |     |   | OR=0.693                  | ID: ,6,0:10 |     |    |
|    |     |     |   |                           | PL: 787     |     |    |
|    |     |     |   |                           | PS          |     |    |
|    |     |     |   |                           | GT          |     |    |
|    |     |     |   |                           | :A 0 1:6,2  |     |    |
|    |     |     |   |                           | D: :8:66:   |     |    |
|    |     |     |   |                           | DP: 0 1:11  |     |    |
| 11 |     |     | P | AC=1;AF=0.500;AN=2;Bas    | GQ 202_C    | BF. | no |
| 20 | C G | 58. | A | eQRankSum=-3.660e-        | :PG _G:66,  | 7   |    |
| 2  |     | 64  | S | 01;DP=9;ExcessHet=0.0000  | T:P 0,246:  |     |    |
|    |     |     | S | ;FS=0.000;MLEAC=1;MLE     | PL: 11202   |     |    |
|    |     |     |   | AF=0.500;MQ=60.00;MQR     | PS          |     |    |
|    |     |     |   | ankSum=0.00;QD=7.33;Rea   | GT 1 1:0,1  |     |    |
|    |     |     |   | dPosRankSum=-             | :A :1:3:1   |     |    |
|    |     |     |   | 2.100e+00;SOR=0.307       | D: 1:1122   |     |    |
|    |     |     |   |                           | DP: 1_G_    |     |    |
| 11 |     |     | P | AC=2;AF=1.00;AN=2;DP=     | GQ GAAT     | BF. | no |
| 22 | C A | 30. | A | 2;ExcessHet=0.0000;FS=0.0 | :PG GTGT    | 7   |    |
| 4  |     | 48  | S | 00;MLEAC=1;MLEAF=0.5      | T:P A:40,3  |     |    |
|    |     |     |   | 00;MQ=60.00;QD=30.48;S    | ID: ,0:112  |     |    |
|    |     |     |   | OR=1.609                  | 21          |     |    |

|    |   |   |     |   |                           |     |         |     |    |
|----|---|---|-----|---|---------------------------|-----|---------|-----|----|
| 11 |   |   |     | P | AC=2;AF=1.00;AN=2;DP=     | PL: |         |     |    |
| 83 | G | C | 78. | A | 2;ExcessHet=0.0000;FS=0.0 | PS  |         |     |    |
| 1  |   |   | 32  | S | 00;MLEAC=1;MLEAF=0.5      | GT  |         |     |    |
|    |   |   |     | S | 00;MQ=60.00;QD=28.50;S    | :A  | 1 1:0,2 |     |    |
|    |   |   |     |   | OR=0.693                  | D:  | :2:6:1  |     |    |
|    |   |   |     |   |                           | DP: | 1:1183  | BF. | no |
|    |   |   |     |   |                           | GQ  | 1_G_    | 7   |    |
|    |   |   |     |   |                           | :PG | C:90,6  |     |    |
|    |   |   |     |   |                           | T:P | ,0:118  |     |    |
|    |   |   |     |   |                           | ID: | 31      |     |    |
|    |   |   |     |   |                           | PL: |         |     |    |
|    |   |   |     |   |                           | PS  |         |     |    |
|    |   |   |     |   |                           | GT  |         |     |    |
|    |   |   |     |   |                           | :A  | 1 1:0,1 |     |    |
| 11 |   |   |     | P | AC=2;AF=1.00;AN=2;DP=     | D:  | :1:3:1  |     |    |
| 85 | T | G | 35. | A | 1;ExcessHet=0.0000;FS=0.0 | DP: | 1:1185  | BF. | no |
| 9  |   |   | 48  | S | 00;MLEAC=1;MLEAF=0.5      | GQ  | 9_T_    | 7   |    |
|    |   |   |     | S | 00;MQ=60.00;QD=26.72;S    | :PG | G:45,3  |     |    |
|    |   |   |     |   | OR=1.609                  | T:P | ,0:118  |     |    |
|    |   |   |     |   |                           | ID: | 59      |     |    |
|    |   |   |     |   |                           | PL: |         |     |    |
|    |   |   |     |   |                           | PS  |         |     |    |
|    |   |   |     |   |                           | GT  |         |     |    |
|    |   |   |     |   |                           | :A  | 1 1:0,1 |     |    |
| 11 |   |   |     | P | AC=2;AF=1.00;AN=2;DP=     | D:  | :1:3:1  |     |    |
| 86 | A | C | 35. | A | 1;ExcessHet=0.0000;FS=0.0 | DP: | 1:1185  | BF. | no |
| 0  |   |   | 48  | S | 00;MLEAC=1;MLEAF=0.5      | GQ  | 9_T_    | 7   |    |
|    |   |   |     | S | 00;MQ=60.00;QD=24.84;S    | :PG | G:45,3  |     |    |
|    |   |   |     |   | OR=1.609                  | T:P | ,0:118  |     |    |
|    |   |   |     |   |                           | ID: | 59      |     |    |
|    |   |   |     |   |                           | PL: |         |     |    |
|    |   |   |     |   |                           | PS  |         |     |    |
|    |   |   |     |   |                           | GT  |         |     |    |
|    |   |   |     |   |                           | :A  | 1 1:0,1 |     |    |
| 11 |   |   |     | P | AC=2;AF=1.00;AN=2;DP=     | D:  | :1:3:1  |     |    |
| 86 | G | T | 35. | A | 1;ExcessHet=0.0000;FS=0.0 | DP: | 1:1185  | BF. | no |
| 3  |   |   | 48  | S | 00;MLEAC=1;MLEAF=0.5      | GQ  | 9_T_    | 7   |    |
|    |   |   |     | S | 00;MQ=60.00;QD=25.31;S    | :PG | G:45,3  |     |    |
|    |   |   |     |   | OR=1.609                  | T:P | ,0:118  |     |    |
|    |   |   |     |   |                           | ID: | 59      |     |    |
|    |   |   |     |   |                           | PL: |         |     |    |
|    |   |   |     |   |                           | PS  |         |     |    |
|    |   |   |     |   |                           | GT  | 0 1:1,1 |     |    |
| 12 |   |   |     | P | AC=1;AF=0.500;AN=2;Bas    | :A  | :2:39:  | BF. | no |
| 00 | C | A | 31. | A | eQRankSum=0.00;DP=2;Ex    | D:  | 0 1:12  | 7   |    |
| 5  |   |   | 64  | S | cessHet=0.0000;FS=0.000;  | DP: | 005_C   |     |    |
|    |   |   |     | S | MLEAC=1;MLEAF=0.500;      |     |         |     |    |

|    |   |   |   |                                                                                                                                                               |     |         |     |     |
|----|---|---|---|---------------------------------------------------------------------------------------------------------------------------------------------------------------|-----|---------|-----|-----|
|    |   |   |   | MQ=60.00;MQRankSum=0.00;QD=15.82;ReadPosRankSum=0.674;SOR=0.693                                                                                               | GQ  | _A:39,  |     |     |
|    |   |   |   |                                                                                                                                                               | :PG | 0,39:1  |     |     |
|    |   |   |   |                                                                                                                                                               | T:P | 2005    |     |     |
|    |   |   |   |                                                                                                                                                               | ID: |         |     |     |
|    |   |   |   |                                                                                                                                                               | PL: |         |     |     |
|    |   |   |   |                                                                                                                                                               | PS  |         |     |     |
|    |   |   |   |                                                                                                                                                               | GT  |         |     |     |
|    |   |   |   |                                                                                                                                                               | :A  |         |     |     |
|    |   |   |   |                                                                                                                                                               | D:  | 0 1:1,1 |     |     |
|    |   |   |   |                                                                                                                                                               | DP: | :2:39:  |     |     |
| 12 |   |   | P | AC=1;AF=0.500;AN=2;DP=2;ExcessHet=0.0000;FS=0.000;MLEAC=1;MLEAF=0.500;MQ=60.00;MQRankSum=0.00;QD=15.82;SOR=0.693                                              | DP: | 0 1:12  |     |     |
| 00 | T | C | A |                                                                                                                                                               | GQ  | 005_C   | BF. | no  |
| 6  |   |   | S |                                                                                                                                                               | :PG | _A:39,  | 7   |     |
|    |   |   | S |                                                                                                                                                               | T:P | 0,39:1  |     |     |
|    |   |   |   |                                                                                                                                                               | ID: | 2005    |     |     |
|    |   |   |   |                                                                                                                                                               | PL: |         |     |     |
|    |   |   |   |                                                                                                                                                               | PS  |         |     |     |
|    |   |   |   |                                                                                                                                                               | GT  |         |     |     |
|    |   |   |   |                                                                                                                                                               | :A  |         |     |     |
|    |   |   |   |                                                                                                                                                               | D:  | 1 1:0,1 |     |     |
|    |   |   |   |                                                                                                                                                               | DP: | :1:3:1  |     |     |
| 12 |   |   | P | AC=2;AF=1.00;AN=2;DP=1;ExcessHet=0.0000;FS=0.000;MLEAC=1;MLEAF=0.500;MQ=60.00;QD=31.63;SOR=1.609                                                              | GQ  | 1:1200  | BF. | no  |
| 00 | T | C | A |                                                                                                                                                               | :PG | 5_C_    | 7   |     |
| 9  |   |   | S |                                                                                                                                                               | T:P | A:45,3  |     |     |
|    |   |   |   |                                                                                                                                                               | ID: | ,0:120  |     |     |
|    |   |   |   |                                                                                                                                                               | PL: | 05      |     |     |
|    |   |   |   |                                                                                                                                                               | PS  |         |     |     |
|    |   |   |   |                                                                                                                                                               | GT  |         |     |     |
|    |   |   |   |                                                                                                                                                               | :A  |         |     |     |
|    |   |   |   |                                                                                                                                                               | D:  | 1/1:17  |     |     |
|    |   |   |   |                                                                                                                                                               | :A  | ,5957:  |     |     |
| 12 |   |   | P | AC=2;AF=1.00;AN=2;BaseQRankSum=1.39;DP=6233;ExcessHet=0.0000;FS=0.000;MLEAC=2;MLEAF=1.00;MQ=60.00;MQRankSum=-2.220e-01;QD=23.23;ReadPosRankSum=4.35;SOR=0.066 | D:  | 5976:9  | BF. | yes |
| 16 | G | A | A |                                                                                                                                                               | DP: | 9:2360  | 7   |     |
| 0  |   |   | S |                                                                                                                                                               | GQ  | 41,173  |     |     |
|    |   |   | S |                                                                                                                                                               | :PL | 36,0    |     |     |
|    |   |   |   |                                                                                                                                                               | GT  |         |     |     |
|    |   |   |   |                                                                                                                                                               | :A  | 1 1:0,1 |     |     |
|    |   |   |   |                                                                                                                                                               | D:  | :1:3:1  |     |     |
|    |   |   |   |                                                                                                                                                               | DP: | 1:1242  |     |     |
| 12 |   |   | P | AC=2;AF=1.00;AN=2;DP=1;ExcessHet=0.0000;FS=0.000;MLEAC=1;MLEAF=0.500;MQ=60.00;QD=32.70;SOR=1.609                                                              | GQ  | 8_G_    | BF. | no  |
| 43 | T | C | A |                                                                                                                                                               | :PG | GAAT    | 7   |     |
| 0  |   |   | S |                                                                                                                                                               | T:P | TA:45   |     |     |
|    |   |   |   |                                                                                                                                                               | ID: | ,3,0:12 |     |     |
|    |   |   |   |                                                                                                                                                               | PL: | 428     |     |     |
|    |   |   |   |                                                                                                                                                               | PS  |         |     |     |

|               |     |                      |                  |                                                                                                                                                                |                                                                                                                                                                                                                                           |          |     |
|---------------|-----|----------------------|------------------|----------------------------------------------------------------------------------------------------------------------------------------------------------------|-------------------------------------------------------------------------------------------------------------------------------------------------------------------------------------------------------------------------------------------|----------|-----|
| 12<br>64<br>0 | T A | 35.<br>48            | P<br>A<br>S<br>S | AC=2;AF=1.00;AN=2;DP=1;ExcessHet=0.0000;FS=0.00;MLEAC=1;MLEAF=0.500;MQ=60.00;QD=29.96;SOR=1.609                                                                | GT<br>:A 1 1:0,1<br>D: :1:3:1 <br>DP: 1:1263<br>GQ 8_C_<br>:PG CTT:4<br>T:P 5,3,0:1<br>ID: 2638<br>PL:<br>PS<br>GT 1 1:0,1<br>:A :1:3:1 <br>D: 1:1269<br>DP: 5_C_<br>GQ CACA<br>:PG CAG<br>T:P AGTC<br>ID: TA:45<br>PL: ,3,0:12<br>PS 695 | BF.<br>7 | no  |
| 12<br>69<br>7 | T A | 35.<br>48            | P<br>A<br>S<br>S | AC=2;AF=1.00;AN=2;DP=1;ExcessHet=0.0000;FS=0.00;MLEAC=1;MLEAF=0.500;MQ=60.00;QD=29.19;SOR=1.609                                                                | GT<br>:A 0/1:4,<br>D: 4:8:75<br>DP: :75,0,7<br>GQ 5<br>:PL                                                                                                                                                                                | BF.<br>7 | no  |
| 12<br>84<br>4 | G T | 67.<br>64            | P<br>A<br>S<br>S | AC=1;AF=0.500;AN=2;BaseQRankSum=0.00;DP=8;ExcessHet=0.0000;FS=0.000;MLEAC=1;MLEAF=0.500;MQ=60.00;MQRankSum=0.00;QD=8.45;ReadPosRankSum=0.816;SOR=0.693         | GT<br>:A 1/1:4,<br>D: 5070:5<br>D: 074:99<br>DP: :18889<br>GQ 0,1506<br>:PL 4,0                                                                                                                                                           | BF.<br>7 | yes |
| 12<br>88<br>0 | C T | 18<br>88<br>76.<br>1 | P<br>A<br>S<br>S | AC=2;AF=1.00;AN=2;BaseQRankSum=-1.492e+00;DP=5286;ExcessHet=0.0000;FS=0.000;MLEAC=2;MLEAF=1.00;MQ=60.00;MQRankSum=0.301;QD=29.20;ReadPosRankSum=2.40;SOR=1.006 | GT<br>:A 1 1:0,1<br>D: :1:3:1 <br>DP: 1:1317<br>GQ 1_T_T<br>:PG ATAG<br>T:P AA:45<br>ID: ,3,0:13<br>PL: 171<br>PS                                                                                                                         | BF.<br>7 | yes |
| 13<br>17<br>3 | G A | 35.<br>48            | P<br>A<br>S<br>S | AC=2;AF=1.00;AN=2;DP=1;ExcessHet=0.0000;FS=0.00;MLEAC=1;MLEAF=0.500;MQ=60.00;QD=30.34;SOR=1.609                                                                |                                                                                                                                                                                                                                           | BF.<br>7 | no  |



|               |        |                |                  |                                                                                                                                                                   |                                                                     |                                                                   |          |    |
|---------------|--------|----------------|------------------|-------------------------------------------------------------------------------------------------------------------------------------------------------------------|---------------------------------------------------------------------|-------------------------------------------------------------------|----------|----|
| 13<br>33<br>9 | T<br>G | 77<br>0.6<br>4 | P<br>A<br>S<br>S | AC=1;AF=0.500;AN=2;BaseQRankSum=0.348;DP=287;ExcessHet=0.0000;FS=1.797;MLEAC=1;MLEAF=0.500;MQ=60.00;MQRankSum=0.00;QD=2.71;ReadPosRankSum=1.34;SOR=0.861          | GT<br>:A<br>D:<br>DP:<br>GQ<br>:PL                                  | 0/1:22<br>5,59:2<br>84:99:<br>778,0,<br>5323                      | BF.<br>7 | no |
| 13<br>54<br>0 | G<br>A | 58.<br>64      | P<br>A<br>S<br>S | AC=1;AF=0.500;AN=2;BaseQRankSum=-2.100e+00;DP=9;ExcessHet=0.0000;FS=0.000;MLEAC=1;MLEAF=0.500;MQ=60.00;MQRankSum=0.00;QD=7.33;ReadPosRankSum=-1.242e+00;SOR=0.307 | GT<br>:A<br>D:<br>DP:<br>GQ<br>:PG<br>T:P<br>ID:<br>PL:<br>PS<br>GT | 0 1:6,2<br>:8:66:<br>0 1:13<br>540_G<br>_A:66,<br>0,246:<br>13540 | BF.<br>7 | no |
| 13<br>54<br>6 | G<br>A | 58.<br>64      | P<br>A<br>S<br>S | AC=1;AF=0.500;AN=2;BaseQRankSum=-2.100e+00;DP=8;ExcessHet=0.0000;FS=0.000;MLEAC=1;MLEAF=0.500;MQ=60.00;MQRankSum=0.00;QD=7.33;ReadPosRankSum=-1.242e+00;SOR=0.307 | GT<br>:A<br>D:<br>DP:<br>GQ<br>:PG<br>T:P<br>ID:<br>PL:<br>PS<br>GT | 0 1:6,2<br>:8:66:<br>0 1:13<br>540_G<br>_A:66,<br>0,246:<br>13540 | BF.<br>7 | no |
| 13<br>54<br>7 | A<br>C | 58.<br>64      | P<br>A<br>S<br>S | AC=1;AF=0.500;AN=2;BaseQRankSum=-2.100e+00;DP=8;ExcessHet=0.0000;FS=0.000;MLEAC=1;MLEAF=0.500;MQ=60.00;MQRankSum=0.00;QD=7.33;ReadPosRankSum=-2.100e+00;SOR=0.307 | GT<br>:A<br>D:<br>DP:<br>GQ<br>:PG<br>T:P<br>ID:<br>PL:<br>PS<br>GT | 0 1:6,2<br>:8:66:<br>0 1:13<br>540_G<br>_A:66,<br>0,246:<br>13540 | BF.<br>7 | no |
| 13<br>54<br>9 | A<br>T | 58.<br>64      | P<br>A<br>S<br>S | AC=1;AF=0.500;AN=2;BaseQRankSum=-2.100e+00;DP=8;ExcessHet=0.0000;FS=0.000;MLEAC=1;MLEAF=0.500;MQ=60.00;MQRankSum=0.00;QD=7.33;ReadPosRankSum=-2.100e+00;SOR=0.307 | GT<br>:A<br>D:<br>DP:<br>GQ<br>:PG<br>T:P<br>ID:                    | 0 1:6,2<br>:8:66:<br>0 1:13<br>540_G<br>_A:66,<br>0,246:<br>13540 | BF.<br>7 | no |

|    |   |     |   |  |                                   |            |     |  |     |
|----|---|-----|---|--|-----------------------------------|------------|-----|--|-----|
|    |   |     |   |  |                                   | PL:<br>PS  |     |  |     |
|    |   |     |   |  | AC=1;AF=0.500;AN=2;BaseQRankSum=- | GT 0/1:48  |     |  |     |
| 14 |   | 22  | P |  | 3.358e+00;DP=6062;Excess          | :A 34,106  |     |  |     |
| 12 | G | 51  | A |  | Het=0.0000;FS=0.000;MLE           | D: 8:5902  | BF. |  | no  |
| 6  | A | 8.6 | S |  | AC=1;MLEAF=0.500;MQ=              | DP: :99:22 | 7   |  |     |
|    |   | 4   | S |  | 60.00;MQRankSum=0.00;Q            | GQ 526,0,  |     |  |     |
|    |   |     |   |  | D=3.82;ReadPosRankSum=-           | :PL 16815  |     |  |     |
|    |   |     |   |  | -1.090e+00;SOR=0.712              | 6          |     |  |     |
|    |   |     |   |  | AC=2;AF=1.00;AN=2;DP=             | GT 1/1:0,  |     |  |     |
| 14 |   | 19  | P |  | 5320;ExcessHet=0.0000;FS          | :A 2777:2  |     |  |     |
| 18 | G | 34  | A |  | =0.000;MLEAC=2;MLEAF              | D: 904:99  | BF. |  | yes |
| 1  | C | 26. | S |  | =1.00;MQ=60.00;QD=30.67           | DP: :19344 | 7   |  |     |
|    |   | 1   | S |  | ;SOR=1.242                        | GQ 0,1520  |     |  |     |
|    |   |     |   |  | AC=2;AF=1.00;AN=2;Base            | :PL 4,0    |     |  |     |
|    |   |     |   |  | QRankSum=-5.540e-                 | GT 1/1:3,  |     |  |     |
| 14 |   | 47  | P |  | 01;DP=179;ExcessHet=0.00          | :A 169:17  |     |  |     |
| 26 | C | 06. | A |  | 00;FS=2.147;MLEAC=2;M             | D: 2:99:4  | BF. |  | no  |
| 5  | T | 06  | S |  | LEAF=1.00;MQ=60.00;MQ             | DP: 720,42 | 7   |  |     |
|    |   |     | S |  | RankSum=0.00;QD=27.36;            | GQ 8,0     |     |  |     |
|    |   |     |   |  | ReadPosRankSum=-2.690e-           | :PL        |     |  |     |
|    |   |     |   |  | 01;SOR=0.484                      |            |     |  |     |
|    |   |     |   |  | AC=2;AF=1.00;AN=2;Base            | GT 1/1:8,  |     |  |     |
| 14 |   | 21  | P |  | QRankSum=-1.810e-                 | :A 5449:5  |     |  |     |
| 40 | C | 16  | A |  | 01;DP=5754;ExcessHet=0.0          | D: 525:99  | BF. |  | yes |
| 8  | T | 46. | S |  | 000;FS=0.000;MLEAC=2;             | DP: :21166 | 7   |  |     |
|    |   | 1   | S |  | MLEAF=1.00;MQ=60.00;M             | GQ 0,1612  |     |  |     |
|    |   |     |   |  | QRankSum=0.285;QD=28.5            | :PL 9,0    |     |  |     |
|    |   |     |   |  | 5;ReadPosRankSum=0.849;           |            |     |  |     |
|    |   |     |   |  | SOR=0.577                         | GT         |     |  |     |
|    |   |     |   |  | AC=2;AF=1.00;AN=2;DP=             | :A 1 1:0,1 |     |  |     |
| 14 |   | 35. | P |  | 1;ExcessHet=0.0000;FS=0.0         | D: :1:3:1  |     |  |     |
| 97 | A | 48  | A |  | 00;MLEAC=1;MLEAF=0.5              | DP: 1:1497 | BF. |  | no  |
| 7  | G |     | S |  | 00;MQ=60.00;QD=26.13;S            | GQ 7_A_    | 7   |  |     |
|    |   |     | S |  | OR=1.609                          | :PG G:45,3 |     |  |     |
|    |   |     |   |  |                                   | T:P ,0:149 |     |  |     |
|    |   |     |   |  |                                   | ID: 77     |     |  |     |
|    |   |     |   |  |                                   | PL:        |     |  |     |
|    |   |     |   |  |                                   | PS         |     |  |     |
| 14 |   | 35. | P |  | AC=2;AF=1.00;AN=2;DP=             | GT 1 1:0,1 |     |  |     |
| 98 | T | 48  | A |  | 1;ExcessHet=0.0000;FS=0.0         | :A :1:3:1  | BF. |  | no  |
| 2  | A |     | S |  | 00;MLEAC=1;MLEAF=0.5              | D: 1:1497  | 7   |  |     |
|    |   |     | S |  |                                   | DP: 7_A_   |     |  |     |

|               |     |                      |                  |                                                                                                                                                                                 |                                                                                                                                                                                                                                     |          |     |
|---------------|-----|----------------------|------------------|---------------------------------------------------------------------------------------------------------------------------------------------------------------------------------|-------------------------------------------------------------------------------------------------------------------------------------------------------------------------------------------------------------------------------------|----------|-----|
|               |     |                      |                  | 00;MQ=60.00;QD=29.87;S<br>OR=1.609                                                                                                                                              | GQ G:45,3<br>:PG ,0:149<br>T:P 77<br>ID:<br>PL:<br>PS                                                                                                                                                                               |          |     |
| 15<br>44<br>4 | G T | 21<br>32<br>83.<br>1 | P<br>A<br>S<br>S | AC=2;AF=1.00;AN=2;Base<br>QRankSum=2.06;DP=5790;<br>ExcessHet=0.0000;FS=0.00<br>0;MLEAC=2;MLEAF=1.00;<br>MQ=60.00;MQRankSum=0.<br>00;QD=26.61;ReadPosRank<br>Sum=2.03;SOR=0.811 | GT 1/1:2,<br>:A 5584:5<br>D: 591:99<br>DP: :21329<br>GQ 7,1674<br>:PL 8,0                                                                                                                                                           | BF.<br>7 | no  |
| 15<br>45<br>1 | G A | 98<br>2.0<br>6       | P<br>A<br>S<br>S | AC=2;AF=1.00;AN=2;DP=<br>38;ExcessHet=0.0000;FS=0.<br>000;MLEAC=2;MLEAF=1.<br>00;MQ=60.00;QD=26.54;S<br>OR=0.746                                                                | GT<br>:A 1/1:0,<br>D: 37:37:<br>DP: 99:996<br>GQ ,111,0<br>:PL                                                                                                                                                                      | BF.<br>7 | no  |
| 15<br>71<br>4 | C T | 22<br>89<br>44.<br>1 | P<br>A<br>S<br>S | AC=2;AF=1.00;AN=2;Base<br>QRankSum=2.73;DP=6107;<br>ExcessHet=0.0000;FS=0.00<br>0;MLEAC=2;MLEAF=1.00;<br>MQ=60.00;MQRankSum=0.<br>00;QD=34.42;ReadPosRank<br>Sum=2.84;SOR=0.631 | GT 1/1:3,<br>:A 5254:5<br>D: 257:99<br>DP: :22895<br>GQ 8,1760<br>:PL 2,0                                                                                                                                                           | BF.<br>7 | yes |
| 15<br>86<br>5 | C A | 35.<br>48            | P<br>A<br>S<br>S | AC=2;AF=1.00;AN=2;DP=<br>1;ExcessHet=0.0000;FS=0.0<br>00;MLEAC=1;MLEAF=0.5<br>00;MQ=60.00;QD=28.89;S<br>OR=1.609                                                                | GT<br>:A 1 1:0,1<br>D: :1:3:1 <br>DP: 1:1585<br>GQ 6_AC<br>:PG T_A:4<br>T:P 5,3,0:1<br>ID: 5856<br>PL:<br>PS<br>GT<br>:A 1 1:0,1<br>D: :1:3:1 <br>DP: 1:1592<br>GQ 7_T_T<br>:PG TGAA<br>T:P CATG<br>ID: :45,3,0<br>PL: :15927<br>PS | BF.<br>7 | no  |
| 15<br>93<br>2 | A T | 35.<br>48            | P<br>A<br>S<br>S | AC=2;AF=1.00;AN=2;DP=<br>1;ExcessHet=0.0000;FS=0.0<br>00;MLEAC=1;MLEAF=0.5<br>00;MQ=60.00;QD=32.35;S<br>OR=1.609                                                                | GT<br>:A 1 1:0,1<br>D: :1:3:1 <br>DP: 1:1592<br>GQ 7_T_T<br>:PG TGAA<br>T:P CATG<br>ID: :45,3,0<br>PL: :15927<br>PS                                                                                                                 | BF.<br>7 | no  |

|    |   |   |     |   |                           |     |         |     |    |
|----|---|---|-----|---|---------------------------|-----|---------|-----|----|
| 16 |   |   |     | P | AC=2;AF=1.00;AN=2;DP=     | GT  |         |     |    |
| 09 | C | T | 35. | A | 1;ExcessHet=0.0000;FS=0.0 | :A  | 1 1:0,1 |     |    |
| 2  |   |   | 48  | S | 00;MLEAC=1;MLEAF=0.5      | D:  | :1:3:1  |     |    |
|    |   |   |     | S | 00;MQ=60.00;QD=29.61;S    | DP: | 1:1608  |     |    |
|    |   |   |     |   | OR=1.609                  | GQ  | 9_G_    | BF. | no |
|    |   |   |     |   |                           | :PG | GTCT    | 7   |    |
|    |   |   |     |   |                           | T:P | GGCT    |     |    |
|    |   |   |     |   |                           | ID: | :45,3,0 |     |    |
|    |   |   |     |   |                           | PL: | :16089  |     |    |
|    |   |   |     |   |                           | PS  |         |     |    |
| 16 |   |   | 11  | P | AC=2;AF=1.00;AN=2;Base    | GT  |         |     |    |
| 48 | A | G | 94  | A | QRankSum=1.29;DP=470;E    | :A  | 1/1:20  |     |    |
| 2  |   |   | 7.0 | S | xcessHet=0.0000;FS=0.000; | D:  | ,437:4  |     |    |
|    |   |   | 6   | S | MLEAC=2;MLEAF=1.00;       | DP: | 57:99:  | BF. | no |
|    |   |   |     |   | MQ=60.00;MQRankSum=0.     | GQ  | 11961,  | 7   |    |
|    |   |   |     |   | 00;QD=26.14;ReadPosRank   | :PL | 841,0   |     |    |
|    |   |   |     |   | Sum=1.72;SOR=0.698        |     |         |     |    |
|    |   |   |     |   |                           | GT  |         |     |    |
| 16 |   |   | 10  | P | AC=1;AF=0.500;AN=2;Bas    | :A  | 0 1:33, |     |    |
| 93 | G | T | 3.6 | A | eQRankSum=0.417;DP=39;    | D:  | 5:38:9  |     |    |
| 5  |   |   | 4   | S | ExcessHet=0.0000;FS=1.85  | DP: | 9:0 1:1 |     |    |
|    |   |   |     | S | 4;MLEAC=1;MLEAF=0.50      | GQ  | 6935_   | BF. | no |
|    |   |   |     |   | 00;MQ=60.00;MQRankSum=    | :PG | G_T:1   | 7   |    |
|    |   |   |     |   | 0.00;QD=2.73;ReadPosRan   | T:P | 11,0,1  |     |    |
|    |   |   |     |   | kSum=-                    | ID: | 290:16  |     |    |
|    |   |   |     |   | 1.823e+00;SOR=0.911       | PL: | 935     |     |    |
|    |   |   |     |   |                           | PS  |         |     |    |
| 16 |   |   | 78. | P | AC=2;AF=1.00;AN=2;DP=     | GT  |         |     |    |
| 98 | T | A | 31  | A | 2;ExcessHet=0.0000;FS=0.0 | :A  | 1/1:0,  |     |    |
| 6  |   |   |     | S | 00;MLEAC=1;MLEAF=0.5      | D:  | 2:2:6:  | BF. | no |
|    |   |   |     | S | 00;MQ=60.00;QD=31.78;S    | DP: | 90,6,0  | 7   |    |
|    |   |   |     |   | OR=0.693                  | GQ  |         |     |    |
|    |   |   |     |   |                           | :PL |         |     |    |
|    |   |   |     |   |                           | GT  |         |     |    |
| 16 |   |   | 78. | P | AC=2;AF=1.00;AN=2;DP=     | :A  | 1/1:0,  |     |    |
| 99 | C | G | 32  | A | 2;ExcessHet=0.0000;FS=0.0 | D:  | 2:2:6:  | BF. | no |
| 5  |   |   |     | S | 00;MLEAC=1;MLEAF=0.5      | DP: | 90,6,0  | 7   |    |
|    |   |   |     | S | 00;MQ=60.00;QD=31.99;S    | GQ  |         |     |    |
|    |   |   |     |   | OR=0.693                  | :PL |         |     |    |
|    |   |   |     |   |                           | GT  |         |     |    |
| 17 |   |   | 29  | P | AC=2;AF=1.00;AN=2;Base    | GT  | 1/1:5,  |     |    |
| 13 | C | T | 06  | A | QRankSum=0.185;DP=1052    | :A  | 1009:1  |     |    |
| 0  |   |   | 9.0 | S | ;ExcessHet=0.0000;FS=0.00 | D:  | 014:99  | BF. | no |
|    |   |   | 6   | S | 0;MLEAC=2;MLEAF=1.00;     | DP: | :29083  | 7   |    |
|    |   |   |     |   | MQ=60.00;MQRankSum=0.     | GQ  | ,2897,  |     |    |
|    |   |   |     |   | 00;QD=28.67;ReadPosRank   | :PL | 0       |     |    |
|    |   |   |     |   | Sum=0.457;SOR=0.553       |     |         |     |    |

|    |   |   |     |   |                           |     |         |     |     |
|----|---|---|-----|---|---------------------------|-----|---------|-----|-----|
| 17 |   |   |     |   | AC=2;AF=1.00;AN=2;Base    | GT  | 1/1:1,  |     |     |
| 41 | C | T | 22  | P | QRankSum=-3.640e-         | :A  | 5558:5  |     |     |
| 0  |   |   | 21  | A | 01;DP=5792;ExcessHet=0.0  | D:  | 562:99  | BF. | yes |
|    |   |   | 19. | S | 000;FS=0.000;MLEAC=2;     | DP: | :22213  | 7   |     |
|    |   |   | 1   | S | MLEAF=1.00;MQ=60.00;M     | GQ  | 3,1671  |     |     |
|    |   |   |     |   | QRankSum=0.793;QD=28.5    | :PL | 8,0     |     |     |
|    |   |   |     |   | 3;ReadPosRankSum=1.64;S   |     |         |     |     |
|    |   |   |     |   | OR=0.441                  |     |         |     |     |
| 17 |   |   |     |   |                           | GT  |         |     |     |
| 66 | T | C | 35. | P | AC=2;AF=1.00;AN=2;DP=     | :A  | 1 1:0,1 |     |     |
| 1  |   |   | 48  | A | 1;ExcessHet=0.0000;FS=0.0 | D:  | :1:3:1  |     |     |
|    |   |   |     | S | 00;MLEAC=1;MLEAF=0.5      | DP: | 1:1765  | BF. | no  |
|    |   |   |     | S | 00;MQ=60.00;QD=25.40;S    | GQ  | 8_G_    | 7   |     |
|    |   |   |     |   | OR=1.609                  | :PG | GAA:    |     |     |
|    |   |   |     |   |                           | T:P | 45,3,0: |     |     |
|    |   |   |     |   |                           | ID: | 17658   |     |     |
|    |   |   |     |   |                           | PL: |         |     |     |
|    |   |   |     |   |                           | PS  |         |     |     |
| 17 |   |   |     |   | AC=2;AF=1.00;AN=2;Base    | GT  | 1/1:1,  |     |     |
| 74 | C | T | 15  | P | QRankSum=-                | :A  | 577:58  |     |     |
| 6  |   |   | 46  | A | 2.651e+00;DP=592;Excess   | D:  | 0:99:1  | BF. | yes |
|    |   |   | 9.0 | S | Het=0.0000;FS=0.000;MLE   | DP: | 5483,1  | 7   |     |
|    |   |   | 6   | S | AC=2;MLEAF=1.00;MQ=6      | GQ  | 691,0   |     |     |
|    |   |   |     |   | 0.00;MQRankSum=0.00;QD    | :PL |         |     |     |
|    |   |   |     |   | =26.76;ReadPosRankSum=0   |     |         |     |     |
|    |   |   |     |   | .929;SOR=0.318            |     |         |     |     |
| 17 |   |   |     |   |                           | GT  |         |     |     |
| 88 | A | T | 31. | P | AC=2;AF=1.00;AN=2;DP=     | :A  | 1 1:0,1 |     |     |
| 0  |   |   | 63  | A | 2;ExcessHet=0.0000;FS=0.0 | D:  | :2:3:1  |     |     |
|    |   |   |     | S | 00;MLEAC=1;MLEAF=0.5      | DP: | 1:1788  | BF. | no  |
|    |   |   |     | S | 00;MQ=60.00;QD=31.63;S    | GQ  | 0_A_*   | 7   |     |
|    |   |   |     |   | OR=2.303                  | :PG | :45,3,0 |     |     |
|    |   |   |     |   |                           | T:P | :17880  |     |     |
|    |   |   |     |   |                           | ID: |         |     |     |
|    |   |   |     |   |                           | PL: |         |     |     |
|    |   |   |     |   |                           | PS  |         |     |     |
| 18 |   |   |     |   |                           | GT  |         |     |     |
| 16 | G | A | 14  | P | AC=2;AF=1.00;AN=2;DP=     | :A  | 1 1:0,3 |     |     |
| 0  |   |   | 28  | A | 330;ExcessHet=0.0000;FS=  | D:  | 28:328  |     |     |
|    |   |   | 8.0 | S | 0.000;MLEAC=2;MLEAF=      | DP: | :99:1 1 | BF. | no  |
|    |   |   | 6   | S | 1.00;MQ=60.00;QD=27.24;   | GQ  | :18160  | 7   |     |
|    |   |   |     |   | SOR=0.921                 | :PG | _G_A:   |     |     |
|    |   |   |     |   |                           | T:P | 14302,  |     |     |
|    |   |   |     |   |                           | ID: | 987,0:  |     |     |
|    |   |   |     |   |                           | PL: | 18160   |     |     |
|    |   |   |     |   |                           | PS  |         |     |     |

|               |        |                      |                  |                                                                                                                                                                                                |                                                                     |                                                                         |          |     |
|---------------|--------|----------------------|------------------|------------------------------------------------------------------------------------------------------------------------------------------------------------------------------------------------|---------------------------------------------------------------------|-------------------------------------------------------------------------|----------|-----|
| 18<br>16<br>3 | A<br>G | 21<br>49<br>34.<br>1 | P<br>A<br>S<br>S | AC=2;AF=1.00;AN=2;Base<br>QRankSum=0.586;DP=5681<br>;ExcessHet=0.0000;FS=0.00<br>0;MLEAC=2;MLEAF=1.00;<br>MQ=60.00;MQRankSum=0.<br>00;QD=27.23;ReadPosRank<br>Sum=1.50;SOR=0.955               | GT<br>:A<br>D:<br>DP:<br>GQ<br>:PL                                  | 1/1:2,<br>5482:5<br>484:99<br>:21494<br>8,1640<br>9,0                   | BF.<br>7 | yes |
| 18<br>24<br>9 | T<br>G | 34.<br>64            | P<br>A<br>S<br>S | AC=1;AF=0.500;AN=2;Bas<br>eQRankSum=-7.400e-<br>01;DP=17;ExcessHet=0.000<br>0;FS=0.000;MLEAC=1;ML<br>EAF=0.500;MQ=60.00;MQ<br>RankSum=0.00;QD=2.16;R<br>eadPosRankSum=-<br>1.209e+00;SOR=0.307 | GT<br>:A<br>D:<br>DP:<br>GQ<br>:PG<br>T:P<br>ID:<br>PL:<br>PS<br>GT | 0 1:14,<br>2:16:4<br>2:0 1:1<br>8249_<br>T_G:4<br>2,0,58<br>2:1824<br>9 | BF.<br>7 | no  |
| 18<br>25<br>0 | A<br>T | 34.<br>64            | P<br>A<br>S<br>S | AC=1;AF=0.500;AN=2;Bas<br>eQRankSum=-7.400e-<br>01;DP=16;ExcessHet=0.000<br>0;FS=0.000;MLEAC=1;ML<br>EAF=0.500;MQ=60.00;MQ<br>RankSum=0.00;QD=2.16;R<br>eadPosRankSum=-<br>1.865e+00;SOR=0.307 | :A<br>D:<br>DP:<br>GQ<br>:PG<br>T:P<br>ID:<br>PL:<br>PS<br>GT       | 0 1:14,<br>2:16:4<br>2:0 1:1<br>8249_<br>T_G:4<br>2,0,58<br>2:1824<br>9 | BF.<br>7 | no  |
| 18<br>31<br>1 | T<br>C | 94.<br>64            | P<br>A<br>S<br>S | AC=1;AF=0.500;AN=2;Bas<br>eQRankSum=0.00;DP=11;E<br>xcessHet=0.0000;FS=0.000;<br>MLEAC=1;MLEAF=0.500;<br>MQ=60.00;MQRankSum=0.<br>00;QD=8.60;ReadPosRankS<br>um=-2.029e+00;SOR=1.179           | :A<br>D:<br>DP:<br>GQ<br>:PG<br>T:P<br>ID:<br>PL:<br>PS<br>GT       | 0 1:8,3<br>:11:99<br>:0 1:18<br>311_T<br>_C:10<br>2,0,32<br>7:1831<br>1 | BF.<br>7 | no  |
| 18<br>31<br>3 | G<br>C | 94.<br>64            | P<br>A<br>S<br>S | AC=1;AF=0.500;AN=2;Bas<br>eQRankSum=0.00;DP=11;E<br>xcessHet=0.0000;FS=0.000;<br>MLEAC=1;MLEAF=0.500;<br>MQ=60.00;MQRankSum=0.<br>00;QD=8.60;ReadPosRankS<br>um=-1.922e+00;SOR=1.179           | GT<br>:A<br>D:<br>DP:<br>GQ<br>:PG<br>T:P<br>ID:                    | 0 1:8,3<br>:11:99<br>:0 1:18<br>311_T<br>_C:10<br>2,0,32<br>7:1831<br>1 | BF.<br>7 | no  |

|    |   |   |     |   |                                                                                                                                                               |                                                                     |     |   |    |
|----|---|---|-----|---|---------------------------------------------------------------------------------------------------------------------------------------------------------------|---------------------------------------------------------------------|-----|---|----|
| 18 |   |   |     | P | AC=1;AF=0.500;AN=2;BaseQRankSum=-4.300e-02;DP=55;ExcessHet=0.000                                                                                              | PL:<br>PS<br>GT<br>:A 0 1:45,<br>D: 7:52:9<br>DP: 9:0 1:1           |     |   |    |
| 66 | G | C | 15  | A | 0;FS=1.639;MLEAC=1;MLEAF=0.500;MQ=60.00;MQRankSum=0.00;QD=2.90;ReadPosRankSum=-1.225e+00;SOR=0.747                                                            | GQ 8668_<br>:PG G_C:1<br>T:P 58,0,1<br>ID: 869:18<br>PL: 668        | BF. | 7 | no |
| 8  |   |   | 4   | S |                                                                                                                                                               |                                                                     |     |   |    |
| 18 |   |   |     | P | AC=1;AF=0.500;AN=2;BaseQRankSum=-6.400e-02;DP=55;ExcessHet=0.000                                                                                              | PL:<br>PS<br>GT<br>:A 0 1:45,<br>D: 7:52:9<br>DP: 9:0 1:1           |     |   |    |
| 66 | T | A | 15  | A | 0;FS=1.639;MLEAC=1;MLEAF=0.500;MQ=60.00;MQRankSum=0.00;QD=2.90;ReadPosRankSum=-1.451e+00;SOR=0.747                                                            | GQ 8668_<br>:PG G_C:1<br>T:P 58,0,1<br>ID: 869:18<br>PL: 668        | BF. | 7 | no |
| 9  |   |   | 4   | S |                                                                                                                                                               |                                                                     |     |   |    |
| 18 |   |   |     | P | AC=1;AF=0.500;AN=2;BaseQRankSum=-6.400e-02;DP=52;ExcessHet=0.000                                                                                              | PL:<br>PS<br>GT<br>:A 0 1:45,<br>D: 7:52:9<br>DP: 9:0 1:1           |     |   |    |
| 67 | G | C | 15  | A | 0;FS=1.639;MLEAC=1;MLEAF=0.500;MQ=60.00;MQRankSum=0.00;QD=2.90;ReadPosRankSum=-1.775e+00;SOR=0.747                                                            | GQ 8668_<br>:PG G_C:1<br>T:P 58,0,1<br>ID: 868:18<br>PL: 668        | BF. | 7 | no |
| 0  |   |   | 4   | S |                                                                                                                                                               |                                                                     |     |   |    |
| 18 |   |   |     | P | AC=1;AF=0.500;AN=2;BaseQRankSum=1.32;DP=196;ExcessHet=0.0000;FS=2.197;MLEAC=1;MLEAF=0.500;MQ=60.00;MQRankSum=0.00;QD=4.05;ReadPosRankSum=-1.830e-01;SOR=0.672 | GT<br>:A 0/1:13<br>D: 5,44:1<br>DP: 79:99:<br>GQ 732,0,<br>:PL 3241 | BF. | 7 | no |
| 69 | T | C | 72  | A |                                                                                                                                                               |                                                                     |     |   |    |
| 6  |   |   | 4   | S |                                                                                                                                                               |                                                                     |     |   |    |
| 19 |   |   |     | P | AC=1;AF=0.500;AN=2;BaseQRankSum=0.00;DP=22;ExcessHet=0.0000;FS=0.000;MLEAC=1;MLEAF=0.500;MQ=60.00;MQRankSum=0.                                                | GT<br>:A 0/1:16<br>D: ,6:22:<br>DP: 82:82,<br>GQ 0,329<br>:PL       | BF. | 7 | no |
| 12 | A | G | 74. | A |                                                                                                                                                               |                                                                     |     |   |    |
| 4  |   |   | 64  | S |                                                                                                                                                               |                                                                     |     |   |    |

|    |   |   |        |                                                                                                                                                               |     |         |     |    |  |
|----|---|---|--------|---------------------------------------------------------------------------------------------------------------------------------------------------------------|-----|---------|-----|----|--|
|    |   |   |        | 00;QD=3.39;ReadPosRankSum=-4.240e-01;SOR=0.693                                                                                                                |     |         |     |    |  |
| 19 |   |   |        |                                                                                                                                                               | GT  |         |     |    |  |
| 13 |   |   |        | AC=1;AF=0.500;AN=2;BaseQRankSum=-8.100e-                                                                                                                      | :A  | 0 1:13, |     |    |  |
| 2  | G | T | 95.64  | 01;DP=17;ExcessHet=0.000                                                                                                                                      | D:  | 4:17:9  |     |    |  |
|    |   |   |        | 0;FS=2.197;MLEAC=1;MLEAF=0.500;MQ=60.00;MQRankSum=0.00;QD=5.63;ReadPosRankSum=1.09;SOR=1.402                                                                  | DP: | 9:0 1:1 |     |    |  |
|    |   |   |        |                                                                                                                                                               | GQ  | 9132_   | BF. |    |  |
|    |   |   |        |                                                                                                                                                               | :PG | G_T:1   | 7   | no |  |
|    |   |   |        |                                                                                                                                                               | T:P | 03,0,4  |     |    |  |
|    |   |   |        |                                                                                                                                                               | ID: | 62:191  |     |    |  |
|    |   |   |        |                                                                                                                                                               | PL: | 32      |     |    |  |
|    |   |   |        |                                                                                                                                                               | PS  |         |     |    |  |
|    |   |   |        |                                                                                                                                                               | GT  |         |     |    |  |
| 19 |   |   |        | AC=1;AF=0.500;AN=2;BaseQRankSum=-                                                                                                                             | :A  | 0 1:13, |     |    |  |
| 13 |   |   |        | 1.423e+00;DP=17;ExcessHet=0.0000;FS=2.197;MLEAC=1;MLEAF=0.500;MQ=60.00;MQRankSum=0.00;QD=5.63;ReadPosRankSum=0.789;SOR=1.402                                  | D:  | 4:17:9  |     |    |  |
| 7  | A | C | 95.64  |                                                                                                                                                               | DP: | 9:0 1:1 |     |    |  |
|    |   |   |        |                                                                                                                                                               | GQ  | 9132_   | BF. |    |  |
|    |   |   |        |                                                                                                                                                               | :PG | G_T:1   | 7   | no |  |
|    |   |   |        |                                                                                                                                                               | T:P | 03,0,4  |     |    |  |
|    |   |   |        |                                                                                                                                                               | ID: | 62:191  |     |    |  |
|    |   |   |        |                                                                                                                                                               | PL: | 32      |     |    |  |
|    |   |   |        |                                                                                                                                                               | PS  |         |     |    |  |
|    |   |   |        |                                                                                                                                                               | GT  |         |     |    |  |
| 19 |   |   |        | AC=1;AF=0.500;AN=2;BaseQRankSum=-4.520e-                                                                                                                      | :A  | 0 1:11, |     |    |  |
| 67 |   |   |        | 01;DP=17;ExcessHet=0.000                                                                                                                                      | D:  | 4:16:9  |     |    |  |
| 9  | G | T | 127.61 | 0;FS=5.119;MLEAC=1;MLEAF=0.500;MQ=60.00;MQRankSum=0.00;QD=8.51;ReadPosRankSum=-3.460e-01;SOR=1.944                                                            | DP: | 9:0 1:1 |     |    |  |
|    |   |   |        |                                                                                                                                                               | GQ  | 9679_   | BF. |    |  |
|    |   |   |        |                                                                                                                                                               | :PG | G_*:1   | 7   | no |  |
|    |   |   |        |                                                                                                                                                               | T:P | 35,0,4  |     |    |  |
|    |   |   |        |                                                                                                                                                               | ID: | 50:196  |     |    |  |
|    |   |   |        |                                                                                                                                                               | PL: | 79      |     |    |  |
|    |   |   |        |                                                                                                                                                               | PS  |         |     |    |  |
|    |   |   |        |                                                                                                                                                               | GT  |         |     |    |  |
| 19 |   |   |        | AC=1;AF=0.500;AN=2;BaseQRankSum=0.110;DP=16;ExcessHet=0.0000;FS=5.119;MLEAC=1;MLEAF=0.500;MQ=60.00;MQRankSum=0.00;QD=8.51;ReadPosRankSum=-2.900e-01;SOR=1.944 | :A  | 0 1:11, |     |    |  |
| 68 |   |   |        |                                                                                                                                                               | D:  | 4:16:9  |     |    |  |
| 0  | T | A | 127.58 |                                                                                                                                                               | DP: | 9:0 1:1 |     |    |  |
|    |   |   |        |                                                                                                                                                               | GQ  | 9679_   | BF. |    |  |
|    |   |   |        |                                                                                                                                                               | :PG | G_*:1   | 7   | no |  |
|    |   |   |        |                                                                                                                                                               | T:P | 35,0,4  |     |    |  |
|    |   |   |        |                                                                                                                                                               | ID: | 50:196  |     |    |  |
|    |   |   |        |                                                                                                                                                               | PL: | 79      |     |    |  |
|    |   |   |        |                                                                                                                                                               | PS  |         |     |    |  |
|    |   |   |        |                                                                                                                                                               | GT  |         |     |    |  |
| 19 |   |   |        | AC=2;AF=1.00;AN=2;DP=24;ExcessHet=0.0000;FS=0.000;MLEAC=2;MLEAF=1.                                                                                            | GT  | 1/1:0,  |     |    |  |
| 85 |   |   |        |                                                                                                                                                               | :A  | 22:22:  | BF. |    |  |
| 9  | C | T | 2.06   |                                                                                                                                                               | D:  | 66:626  | 7   | no |  |
|    |   |   |        |                                                                                                                                                               | DP: | ,66,0   |     |    |  |



|    |     |                      |                  |                                                                                                                                                                                            |                                                                                                  |
|----|-----|----------------------|------------------|--------------------------------------------------------------------------------------------------------------------------------------------------------------------------------------------|--------------------------------------------------------------------------------------------------|
| 19 | C T | 23<br>03<br>11.<br>1 | P<br>A<br>S<br>S | 00;MQ=60.00;QD=27.82;S<br>OR=0.874<br>AC=2;AF=1.00;AN=2;DP=<br>6010;ExcessHet=0.0000;FS<br>=0.000;MLEAC=2;MLEAF<br>=1.00;MQ=60.00;QD=28.53<br>;SOR=0.842                                   | GQ<br>:PL<br>GT 1/1:0,<br>:A 5897:5<br>D: 897:99 BF.<br>DP: :23032 7 yes<br>GQ 5,1772<br>:PL 6,0 |
| 20 | A G | 21<br>99<br>06.<br>1 | P<br>A<br>S<br>S | AC=2;AF=1.00;AN=2;Base<br>QRankSum=3.11;DP=5956;<br>ExcessHet=0.0000;FS=0.00<br>0;MLEAC=2;MLEAF=1.00;<br>MQ=60.00;MQRankSum=0.<br>00;QD=33.47;ReadPosRank<br>Sum=1.08;SOR=0.677            | GT 1/1:1,<br>:A 5643:5<br>D: 713:99 BF.<br>DP: :21992 7 yes<br>GQ 0,1692<br>:PL 4,0              |
| 20 | C T | 14<br>20<br>72.<br>1 | P<br>A<br>S<br>S | AC=2;AF=1.00;AN=2;Base<br>QRankSum=-4.110e-<br>01;DP=4236;ExcessHet=0.0<br>000;FS=0.000;MLEAC=2;<br>MLEAF=1.00;MQ=60.00;M<br>QRankSum=0.031;QD=34.1<br>4;ReadPosRankSum=1.31;S<br>OR=0.660 | GT 1/1:3,<br>:A 4159:4<br>D: 162:99 BF.<br>DP: :14208 7 yes<br>GQ 6,1241<br>:PL 9,0              |
| 21 | C T | 64<br>8.0<br>6       | P<br>A<br>S<br>S | AC=2;AF=1.00;AN=2;DP=<br>24;ExcessHet=0.0000;FS=0.<br>000;MLEAC=2;MLEAF=1.<br>00;MQ=60.00;QD=27.00;S<br>OR=0.859                                                                           | GT<br>:A 1/1:0,<br>D: 24:24: BF.<br>DP: 72:662 7 no<br>GQ ,72,0<br>:PL                           |
| 21 | A G | 12<br>92<br>86.<br>1 | P<br>A<br>S<br>S | AC=2;AF=1.00;AN=2;Base<br>QRankSum=1.88;DP=3840;<br>ExcessHet=0.0000;FS=0.00<br>0;MLEAC=2;MLEAF=1.00;<br>MQ=60.00;MQRankSum=0.<br>00;QD=32.91;ReadPosRank<br>Sum=1.73;SOR=0.339            | GT 1/1:5,<br>:A 3683:3<br>D: 688:99 BF.<br>DP: :12930 7 yes<br>GQ 0,1093<br>:PL 6,0              |
| 21 | C T | 19<br>57<br>47.<br>1 | P<br>A<br>S<br>S | AC=2;AF=1.00;AN=2;DP=<br>4637;ExcessHet=0.0000;FS<br>=0.000;MLEAC=2;MLEAF<br>=1.00;MQ=60.00;QD=32.91<br>;SOR=0.792                                                                         | GT 1/1:0,<br>:A 4550:4<br>D: 557:99 BF.<br>DP: :19576 7 yes<br>GQ 1,1369<br>:PL 5,0              |
| 21 | G A | 22<br>75<br>38.<br>1 | P<br>A<br>S<br>S | AC=2;AF=1.00;AN=2;DP=<br>6008;ExcessHet=0.0000;FS<br>=0.000;MLEAC=2;MLEAF<br>=1.00;MQ=60.00;MQRankS                                                                                        | GT 1/1:1,<br>:A 5814:5 BF.<br>D: 817:99 7 yes<br>DP: :22755                                      |

|    |     |       |         |  |                                                                                                                                                                    |                                                                                                                                                                                            |       |     |  |
|----|-----|-------|---------|--|--------------------------------------------------------------------------------------------------------------------------------------------------------------------|--------------------------------------------------------------------------------------------------------------------------------------------------------------------------------------------|-------|-----|--|
| 22 |     |       |         |  | um=-3.000e-02;QD=33.27;SOR=0.555                                                                                                                                   | GQ 2,1748<br>:PL 5,0<br>GT 0 1:13,<br>:A 2:15:4<br>D: 5:0 1:2<br>DP: 2176_                                                                                                                 |       |     |  |
| 18 | G C | 37.64 | P A S S |  | AC=1;AF=0.500;AN=2;BaseQRankSum=-1.960e-01;DP=15;ExcessHet=0.0000;FS=0.000;MLEAC=1;MLEAF=0.500;MQ=60.00;MQRankSum=0.00;QD=2.51;ReadPosRankSum=-2.133e+00;SOR=0.569 | GQ C_CA<br>:PG TTAC<br>T:P AGCT<br>ID: A:45,0<br>PL: ,540:2<br>PS 2176<br>GT<br>:A 1 1:0,2<br>D: 2:22:6<br>DP: 6:1 1:2<br>GQ 2199_<br>:PG G_C:9<br>T:P 90,66,<br>ID: 0:2219<br>PL: 9<br>PS | BF. 7 | no  |  |
| 19 | G C | 6.06  | P A S S |  | AC=2;AF=1.00;AN=2;DP=24;ExcessHet=0.0000;FS=0.000;MLEAC=2;MLEAF=1.00;MQ=60.00;QD=29.56;SOR=1.085                                                                   | GQ 2199_<br>:PG G_C:9<br>T:P 90,66,<br>ID: 0:2219<br>PL: 9<br>PS                                                                                                                           | BF. 7 | no  |  |
| 22 | T G | 21.85 | P A S S |  | AC=2;AF=1.00;AN=2;BaseQRankSum=3.98;DP=6018;ExcessHet=0.0000;FS=0.000;MLEAC=2;MLEAF=1.00;MQ=60.00;MQRankSum=0.270;QD=31.26;ReadPosRankSum=0.691;SOR=0.490          | GT 1/1:10<br>:A ,5756:<br>D: 5766:9<br>DP: 9:2186<br>GQ 10,170<br>:PL 84,0                                                                                                                 | BF. 7 | yes |  |
| 22 | C T | 13.88 | P A S S |  | AC=1;AF=0.500;AN=2;BaseQRankSum=1.08;DP=248;ExcessHet=0.0000;FS=0.504;MLEAC=1;MLEAF=0.500;MQ=60.00;MQRankSum=0.00;QD=5.81;ReadPosRankSum=3.80;SOR=0.622            | GT 0/1:16<br>:A 0,79:2<br>D: 39:99:<br>DP: 1396,0<br>GQ ,3510<br>:PL                                                                                                                       | BF. 7 | no  |  |
| 22 | C A | 53.64 | P A S S |  | AC=1;AF=0.500;AN=2;BaseQRankSum=0.00;DP=21;ExcessHet=0.0000;FS=0.000;MLEAC=1;MLEAF=0.500;MQ=60.00;MQRankSum=0.00;QD=2.55;ReadPosRankSum=-8.230e-01;SOR=1.022       | GT 0/1:16<br>:A ,5:21:<br>D: 61:61,<br>DP: 0,373<br>GQ<br>:PL                                                                                                                              | BF. 7 | no  |  |
| 22 | G A | 21.23 | P A     |  | AC=2;AF=1.00;AN=2;BaseQRankSum=3.47;DP=4966;ExcessHet=0.0000;FS=0.00                                                                                               | GT 1/1:16<br>:A ,4844:<br>D: 4860:9                                                                                                                                                        | BF. 7 | yes |  |

|    |   |   |     |   |                           |            |     |     |  |
|----|---|---|-----|---|---------------------------|------------|-----|-----|--|
|    |   |   | 73. | S | 0;MLEAC=2;MLEAF=1.00;     | DP: 9:2123 |     |     |  |
|    |   |   | 1   | S | MQ=60.00;MQRankSum=-      | GQ 87,139  |     |     |  |
|    |   |   |     |   | 1.240e-                   | :PL 87,0   |     |     |  |
|    |   |   |     |   | 01;QD=27.76;ReadPosRank   |            |     |     |  |
|    |   |   |     |   | Sum=2.14;SOR=0.419        |            |     |     |  |
|    |   |   |     |   | AC=2;AF=1.00;AN=2;Base    | GT 1/1:4,  |     |     |  |
| 22 |   |   | 19  | P | QRankSum=0.095;DP=4639    | :A 4570:4  |     |     |  |
| 59 | G | C | 62  | A | ;ExcessHet=0.0000;FS=0.00 | D: 574:99  | BF. |     |  |
| 9  |   |   | 62. | S | 0;MLEAC=2;MLEAF=1.00;     | :19627     | 7   | yes |  |
|    |   |   | 1   | S | MQ=60.00;MQRankSum=0.     | GQ 6,1361  |     |     |  |
|    |   |   |     |   | 171;QD=31.26;ReadPosRan   | :PL 0,0    |     |     |  |
|    |   |   |     |   | kSum=0.920;SOR=0.513      |            |     |     |  |
|    |   |   |     |   | AC=1;AF=0.500;AN=2;Bas    |            |     |     |  |
|    |   |   |     |   | eQRankSum=-6.150e-        | GT         |     |     |  |
| 22 |   |   | 10  | P | 01;DP=13;ExcessHet=0.000  | :A 0/1:7,  |     |     |  |
| 66 | T | C | 1.6 | A | 0;FS=0.000;MLEAC=1;ML     | D: 6:13:9  | BF. |     |  |
| 7  |   |   | 4   | S | EAF=0.500;MQ=60.00;MQ     | DP: 9:109, | 7   | no  |  |
|    |   |   |     | S | RankSum=0.00;QD=7.82;R    | GQ 0,151   |     |     |  |
|    |   |   |     |   | eadPosRankSum=1.59;SOR    | :PL        |     |     |  |
|    |   |   |     |   | =0.495                    |            |     |     |  |
|    |   |   |     |   | AC=2;AF=1.00;AN=2;DP=     | GT 1/1:0,  |     |     |  |
| 22 |   |   | 16  | P | 3797;ExcessHet=0.0000;FS  | :A 3665:3  |     |     |  |
| 67 | C | T | 34  | A | =0.000;MLEAC=2;MLEAF      | D: 665:99  | BF. |     |  |
| 4  |   |   | 06. | S | =1.00;MQ=60.00;QD=26.08   | DP: :16342 | 7   | yes |  |
|    |   |   | 1   | S | ;SOR=0.814                | GQ 0,1103  |     |     |  |
|    |   |   |     |   |                           | :PL 9,0    |     |     |  |
|    |   |   |     |   | AC=2;AF=1.00;AN=2;Base    | GT 1/1:34  |     |     |  |
|    |   |   |     |   | QRankSum=-                | :A ,3398:  |     |     |  |
| 22 |   |   | 13  | P | 1.908e+00;DP=3538;Excess  | D: 3432:9  | BF. |     |  |
| 67 | T | C | 11  | A | Het=0.0000;FS=3.329;MLE   | DP: 9:1311 | 7   | yes |  |
| 9  |   |   | 06. | S | AC=2;MLEAF=1.00;MQ=6      | GQ 20,897  |     |     |  |
|    |   |   | 1   | S | 0.00;MQRankSum=0.00;QD    | :PL 7,0    |     |     |  |
|    |   |   |     |   | =33.85;ReadPosRankSum=0   |            |     |     |  |
|    |   |   |     |   | .305;SOR=0.698            |            |     |     |  |
|    |   |   |     |   | AC=2;AF=1.00;AN=2;Base    | GT 1/1:70  |     |     |  |
|    |   |   |     |   | QRankSum=0.114;DP=3375    | :A ,3202:  |     |     |  |
| 22 |   |   | 12  | P | ;ExcessHet=0.0000;FS=0.00 | D: 3272:9  | BF. |     |  |
| 68 | C | T | 31  | A | 0;MLEAC=2;MLEAF=1.00;     | DP: 9:1232 | 7   | yes |  |
| 6  |   |   | 99. | S | MQ=60.00;MQRankSum=0.     | GQ 13,691  |     |     |  |
|    |   |   | 1   | S | 00;QD=27.08;ReadPosRank   | :PL 3,0    |     |     |  |
|    |   |   |     |   | Sum=1.64;SOR=0.575        |            |     |     |  |
|    |   |   |     |   | AC=2;AF=1.00;AN=2;Base    | GT 1/1:31  |     |     |  |
|    |   |   |     |   | QRankSum=-5.330e-         | :A ,3133:  | BF. |     |  |
| 22 | A | G | 12  | P | 01;DP=3310;ExcessHet=0.0  | D: 3226:9  | 7   | yes |  |
| 68 |   |   | 04  | A | 000;FS=0.000;MLEAC=2;     | DP: 9:1204 |     |     |  |
| 8  |   |   | 37. | S | MLEAF=1.00;MQ=60.00;M     |            |     |     |  |
|    |   |   | 1   | S |                           |            |     |     |  |

|               |        |                      |                  |  |                                                                                                                                                                                           |                                                                        |                                                                                       |          |     |
|---------------|--------|----------------------|------------------|--|-------------------------------------------------------------------------------------------------------------------------------------------------------------------------------------------|------------------------------------------------------------------------|---------------------------------------------------------------------------------------|----------|-----|
|               |        |                      |                  |  | QRankSum=0.00;QD=25.42<br>;ReadPosRankSum=1.90;SOR=0.878                                                                                                                                  | GQ<br>:PL                                                              | 51,837<br>7,0                                                                         |          |     |
| 22<br>77<br>5 | G<br>A | 13<br>99<br>48.<br>1 | P<br>A<br>S<br>S |  | AC=2;AF=1.00;AN=2;Base<br>QRankSum=0.887;DP=3287<br>;ExcessHet=0.0000;FS=0.00<br>0;MLEAC=2;MLEAF=1.00;<br>MQ=60.00;MQRankSum=0.<br>00;QD=29.48;ReadPosRank<br>Sum=2.12;SOR=0.061          | GT<br>:A<br>D:<br>DP:<br>GQ<br>:PG<br>_A:13<br>T:P<br>ID:<br>PL:<br>PS | 1 1:3,3<br>172:31<br>75:99:<br>1 1:22<br>775_G<br>9962,9<br>482,0:<br>22775           | BF.<br>7 | yes |
| 22<br>78<br>6 | A<br>C | 16<br>72<br>74.<br>1 | P<br>A<br>S<br>S |  | AC=2;AF=1.00;AN=2;DP=<br>3775;ExcessHet=0.0000;FS<br>=0.000;MLEAC=2;MLEAF<br>=1.00;MQ=60.00;QD=29.48<br>;SOR=0.726                                                                        | GT<br>:A<br>D:<br>DP:<br>GQ<br>:PL                                     | 1/1:0,<br>3644:3<br>645:99<br>:16728<br>8,1134<br>5,0                                 | BF.<br>7 | yes |
| 22<br>81<br>3 | G<br>T | 16<br>62<br>45.<br>1 | P<br>A<br>S<br>S |  | AC=2;AF=1.00;AN=2;Base<br>QRankSum=2.96;DP=4042;<br>ExcessHet=0.0000;FS=0.00<br>0;MLEAC=2;MLEAF=1.00;<br>MQ=60.00;MQRankSum=0.<br>00;QD=27.08;ReadPosRank<br>Sum=0.700;SOR=0.138          | GT<br>:A<br>D:<br>DP:<br>GQ<br>:PL                                     | 1/1:3,<br>3959:3<br>962:99<br>:16625<br>9,1185<br>1,0                                 | BF.<br>7 | yes |
| 22<br>88<br>2 | T<br>G | 19<br>82<br>34.<br>1 | P<br>A<br>S<br>S |  | AC=2;AF=1.00;AN=2;Base<br>QRankSum=-8.110e-<br>01;DP=4653;ExcessHet=0.0<br>000;FS=0.000;MLEAC=2;<br>MLEAF=1.00;MQ=60.00;M<br>QRankSum=0.00;QD=33.63<br>;ReadPosRankSum=1.21;SO<br>R=0.275 | GT<br>:A<br>D:<br>DP:<br>GQ<br>:PL                                     | 1/1:1,<br>4462:4<br>465:99<br>:19824<br>8,1365<br>1,0                                 | BF.<br>7 | yes |
| 22<br>91<br>7 | T<br>G | 22<br>75<br>79.<br>1 | P<br>A<br>S<br>S |  | AC=2;AF=1.00;AN=2;DP=<br>5113;ExcessHet=0.0000;FS<br>=0.000;MLEAC=2;MLEAF<br>=1.00;MQ=60.00;QD=30.55<br>;SOR=0.765                                                                        | GT<br>:A<br>D:<br>DP:<br>GQ<br>:PG<br>_G:22<br>T:P<br>ID:<br>PL:<br>PS | 1 1:0,5<br>104:51<br>04:99:<br>1 1:22<br>917_T<br>_G:22<br>7593,1<br>5363,0<br>:22917 | BF.<br>7 | yes |

|               |        |                      |                  |                                                                                                    |                                                               |                                                                                       |          |     |
|---------------|--------|----------------------|------------------|----------------------------------------------------------------------------------------------------|---------------------------------------------------------------|---------------------------------------------------------------------------------------|----------|-----|
| 22<br>99<br>2 | G<br>A | 22<br>53<br>05.<br>1 | P<br>A<br>S<br>S | AC=2;AF=1.00;AN=2;DP=5085;ExcessHet=0.0000;FS=0.000;MLEAC=2;MLEAF=1.00;MQ=60.00;QD=25.42;SOR=1.024 | GT<br>:A<br>D:<br>DP:<br>GQ<br>:PG<br>T:P<br>ID:<br>PL:<br>PS | 1 1:0,5<br>025:50<br>25:99:<br>1 1:22<br>917_T<br>_G:22<br>5319,1<br>5125,0<br>:22917 | BF.<br>7 | yes |
| 22<br>99<br>5 | C<br>A | 22<br>53<br>25.<br>1 | P<br>A<br>S<br>S | AC=2;AF=1.00;AN=2;DP=5017;ExcessHet=0.0000;FS=0.000;MLEAC=2;MLEAF=1.00;MQ=60.00;QD=27.65;SOR=1.013 | GT<br>:A<br>D:<br>DP:<br>GQ<br>:PG<br>T:P<br>ID:<br>PL:<br>PS | 1 1:0,5<br>017:50<br>17:99:<br>1 1:22<br>917_T<br>_G:22<br>5339,1<br>5101,0<br>:22917 | BF.<br>7 | yes |
| 23<br>01<br>3 | A<br>C | 19<br>61<br>42.<br>1 | P<br>A<br>S<br>S | AC=2;AF=1.00;AN=2;DP=4360;ExcessHet=0.0000;FS=0.000;MLEAC=2;MLEAF=1.00;MQ=60.00;QD=29.48;SOR=0.996 | GT<br>:A<br>D:<br>DP:<br>GQ<br>:PG<br>T:P<br>ID:<br>PL:<br>PS | 1 1:0,4<br>360:43<br>60:99:<br>1 1:22<br>917_T<br>_G:19<br>6156,1<br>3124,0<br>:22917 | BF.<br>7 | yes |
| 23<br>01<br>8 | T<br>G | 18<br>69<br>04.<br>1 | P<br>A<br>S<br>S | AC=2;AF=1.00;AN=2;DP=4163;ExcessHet=0.0000;FS=0.000;MLEAC=2;MLEAF=1.00;MQ=60.00;QD=30.56;SOR=1.007 | GT<br>:A<br>D:<br>DP:<br>GQ<br>:PG<br>T:P<br>ID:<br>PL:<br>PS | 1 1:0,4<br>155:41<br>55:99:<br>1 1:22<br>917_T<br>_G:18<br>6918,1<br>2507,0<br>:22917 | BF.<br>7 | yes |
| 23<br>05<br>5 | A<br>G | 13<br>68<br>43.<br>1 | P<br>A<br>S<br>S | AC=2;AF=1.00;AN=2;DP=3044;ExcessHet=0.0000;FS=0.000;MLEAC=2;MLEAF=1.00;MQ=60.00;QD=34.30;SOR=0.763 | GT<br>:A<br>D:<br>DP:<br>GQ<br>:PL                            | 1/1:0,<br>3043:3<br>043:99<br>:13685<br>7,9160<br>,0                                  | BF.<br>7 | yes |

|               |        |                      |                  |                                                                                                                                                                           |                                    |                                                       |          |     |
|---------------|--------|----------------------|------------------|---------------------------------------------------------------------------------------------------------------------------------------------------------------------------|------------------------------------|-------------------------------------------------------|----------|-----|
| 23<br>06<br>3 | A<br>T | 13<br>72<br>15.<br>1 | P<br>A<br>S<br>S | AC=2;AF=1.00;AN=2;DP=3059;ExcessHet=0.0000;FS=0.000;MLEAC=2;MLEAF=1.00;MQ=60.00;QD=27.00;SOR=0.829                                                                        | GT<br>:A<br>D:<br>DP:<br>GQ<br>:PL | 1/1:0,<br>3059:3<br>059:99<br>:13722<br>9,9208<br>,0  | BF.<br>7 | yes |
| 23<br>07<br>5 | T<br>C | 13<br>73<br>67.<br>1 | P<br>A<br>S<br>S | AC=2;AF=1.00;AN=2;DP=3175;ExcessHet=0.0000;FS=0.000;MLEAC=2;MLEAF=1.00;MQ=60.00;QD=30.82;SOR=0.852                                                                        | GT<br>:A<br>D:<br>DP:<br>GQ<br>:PL | 1/1:0,<br>3110:3<br>110:99<br>:13738<br>1,9360<br>,0  | BF.<br>7 | yes |
| 23<br>19<br>1 | C<br>T | 12<br>58<br>6.0<br>6 | P<br>A<br>S<br>S | AC=2;AF=1.00;AN=2;BaseQRankSum=0.946;DP=452;ExcessHet=0.0000;FS=0.000;MLEAC=2;MLEAF=1.00;MQ=60.00;MQRankSum=0.00;QD=28.74;ReadPosRankSum=2.08;SOR=0.521                   | GT<br>:A<br>D:<br>DP:<br>GQ<br>:PL | 1/1:3,<br>435:43<br>8:99:1<br>2600,1<br>230,0         | BF.<br>7 | yes |
| 23<br>40<br>3 | A<br>G | 23<br>89<br>39.<br>1 | P<br>A<br>S<br>S | AC=2;AF=1.00;AN=2;BaseQRankSum=-1.388e+00;DP=6196;ExcessHet=0.0000;FS=0.000;MLEAC=2;MLEAF=1.00;MQ=60.00;MQRankSum=-1.000e-03;QD=35.92;ReadPosRankSum=-2.370e-01;SOR=0.474 | GT<br>:A<br>D:<br>DP:<br>GQ<br>:PL | 1/1:3,<br>5904:5<br>915:99<br>:23895<br>3,1784<br>6,0 | BF.<br>7 | yes |
| 23<br>43<br>9 | C<br>T | 55<br>91.<br>64      | P<br>A<br>S<br>S | AC=1;AF=0.500;AN=2;BaseQRankSum=1.71;DP=461;ExcessHet=0.0000;FS=1.746;MLEAC=1;MLEAF=0.500;MQ=60.00;MQRankSum=0.00;QD=12.77;ReadPosRankSum=-8.730e-01;SOR=0.777            | GT<br>:A<br>D:<br>DP:<br>GQ<br>:PL | 0/1:19<br>4,244:<br>438:99<br>:5599,<br>0,4075        | BF.<br>7 | yes |
| 23<br>52<br>5 | C<br>T | 24<br>66<br>20.<br>1 | P<br>A<br>S<br>S | AC=2;AF=1.00;AN=2;BaseQRankSum=3.00;DP=6018;ExcessHet=0.0000;FS=0.000;MLEAC=2;MLEAF=1.00;MQ=60.00;MQRankSum=-1.000e-03;QD=29.63;ReadPosRankSum=-1.310e+00;SOR=0.461       | GT<br>:A<br>D:<br>DP:<br>GQ<br>:PL | 1/1:1,<br>5914:5<br>915:99<br>:24663<br>4,1779<br>1,0 | BF.<br>7 | yes |

|    |   |   |     |   |                           |     |         |        |     |     |
|----|---|---|-----|---|---------------------------|-----|---------|--------|-----|-----|
| 23 |   |   |     |   | AC=2;AF=1.00;AN=2;Base    | GT  | 1/1:19  |        |     |     |
| 59 | T | G | 21  | P | 1.302e+00;DP=4795;Excess  | :A  | ,4759:  |        |     |     |
| 9  |   |   | 15  | A | Het=0.0000;FS=0.000;MLE   | D:  | 4778:9  | BF.    |     | yes |
|    |   |   | 23. | S | AC=2;MLEAF=1.00;MQ=6      | DP: | 9:2115  | 7      |     |     |
|    |   |   | 1   | S | 0.00;MQRankSum=0.104;Q    | GQ  | 37,135  |        |     |     |
|    |   |   |     |   | D=28.76;ReadPosRankSum    | :PL | 26,0    |        |     |     |
|    |   |   |     |   | =3.50;SOR=0.835           |     |         |        |     |     |
| 23 |   |   | 20  | P | AC=2;AF=1.00;AN=2;DP=     | GT  | 1/1:4,  |        |     |     |
| 60 | C | A | 25  | A | 4628;ExcessHet=0.0000;FS  | :A  | 4509:4  |        |     |     |
| 4  |   |   | 59. | S | =0.000;MLEAC=2;MLEAF      | D:  | 517:99  | BF.    |     | yes |
|    |   |   | 1   | S | =1.00;MQ=60.00;MQRankS    | DP: | :20257  | 7      |     |     |
|    |   |   |     |   | um=0.00;QD=27.00;SOR=0    | GQ  | 3,1356  |        |     |     |
|    |   |   |     |   | .945                      | :PL | 1,0     |        |     |     |
| 23 |   |   | 18  | P | AC=2;AF=1.00;AN=2;Base    | GT  | 1/1:1,  |        |     |     |
| 85 | C | A | 01  | A | QRankSum=-6.060e-         | :A  | 4856:4  |        |     |     |
| 4  |   |   | 09. | S | 01;DP=5020;ExcessHet=0.0  | D:  | 857:99  | BF.    |     | yes |
|    |   |   | 1   | S | 000;FS=0.000;MLEAC=2;     | DP: | :18012  | 7      |     |     |
|    |   |   |     |   | MLEAF=1.00;MQ=60.00;M     | GQ  | 3,1456  |        |     |     |
|    |   |   |     |   | QRankSum=0.00;QD=29.94    | :PL | 8,0     |        |     |     |
|    |   |   |     |   | ;ReadPosRankSum=-         |     |         |        |     |     |
|    |   |   |     |   | 1.539e+00;SOR=0.342       |     |         |        |     |     |
| 23 |   |   | 18  | P | AC=2;AF=1.00;AN=2;Base    | GT  | 1/1:4,  |        |     |     |
| 94 | G | T | 53  | A | QRankSum=2.49;DP=5028;    | :A  | 4892:4  |        |     |     |
| 8  |   |   | 16. | S | ExcessHet=0.0000;FS=0.00  | D:  | 898:99  | BF.    |     | yes |
|    |   |   | 1   | S | 0;MLEAC=2;MLEAF=1.00;     | DP: | :18533  | 7      |     |     |
|    |   |   |     |   | MQ=60.00;MQRankSum=0.     | GQ  | 0,1461  |        |     |     |
|    |   |   |     |   | 260;QD=31.54;ReadPosRan   | :PL | 0,0     |        |     |     |
|    |   |   |     |   | kSum=3.32;SOR=0.476       |     |         |        |     |     |
| 24 |   |   | 40  | P | AC=1;AF=0.500;AN=2;Bas    | GT  | 0/1:44  |        |     |     |
| 10 | C | T | 6.6 | A | eQRankSum=0.242;DP=68;    | :A  | ,22:66  |        |     |     |
| 6  |   |   | 4   | S | ExcessHet=0.0000;FS=0.00  | D:  | :99:41  | BF.    |     | yes |
|    |   |   |     | S | 0;MLEAC=1;MLEAF=0.50      | DP: | 4,0,10  | 7      |     |     |
|    |   |   |     |   | 0;MQ=60.00;MQRankSum=     | GQ  | 09      |        |     |     |
|    |   |   |     |   | 0.00;QD=6.16;ReadPosRan   | :PL |         |        |     |     |
|    |   |   |     |   | kSum=0.307;SOR=0.770      |     |         |        |     |     |
| 24 |   |   | 35. | P | AC=2;AF=1.00;AN=2;DP=     | GT  | 1 1:0,1 |        |     |     |
| 15 | C | G | 48  | A | 1;ExcessHet=0.0000;FS=0.0 | :A  | :1:3 1  |        |     |     |
| 0  |   |   |     | S | 00;MLEAC=1;MLEAF=0.5      | D:  | 1:2415  |        |     |     |
|    |   |   |     | S | 00;MQ=60.00;QD=28.93;S    | DP: | GQ      | 1:2415 | BF. | no  |
|    |   |   |     |   | OR=1.609                  | :PG | 0_C_    | 7      |     |     |
|    |   |   |     |   |                           | T:P | G:45,3  |        |     |     |
|    |   |   |     |   |                           | ID: | ,0:241  |        |     |     |
|    |   |   |     |   |                           | PL: | 50      |        |     |     |
|    |   |   |     |   |                           | PS  |         |        |     |     |

|               |        |                      |                  |                                                                                                                                                                     |                                                                                                                  |          |     |
|---------------|--------|----------------------|------------------|---------------------------------------------------------------------------------------------------------------------------------------------------------------------|------------------------------------------------------------------------------------------------------------------|----------|-----|
| 24<br>15<br>1 | T<br>A | 35.<br>48            | P<br>A<br>S<br>S | AC=2;AF=1.00;AN=2;DP=1;ExcessHet=0.0000;FS=0.000;MLEAC=1;MLEAF=0.500;MQ=60.00;QD=28.80;SOR=1.609                                                                    | GT<br>:A<br>D: 1 1:0,1<br>DP: :1:3:1 <br>GQ 1:2415<br>:PG 0_C_<br>T:P G:45,3<br>ID: ,0:241<br>PL: 50<br>PS<br>GT | BF.<br>7 | no  |
| 24<br>38<br>1 | C<br>T | 37<br>1.0<br>6       | P<br>A<br>S<br>S | AC=2;AF=1.00;AN=2;DP=13;ExcessHet=0.0000;FS=0.000;MLEAC=2;MLEAF=1.00;MQ=60.00;QD=30.92;SOR=1.022                                                                    | GT<br>:A 1/1:0,<br>D: 12:12:<br>DP: 36:385<br>GQ ,36,0<br>:PL                                                    | BF.<br>7 | no  |
| 24<br>42<br>4 | A<br>T | 24<br>78<br>51.<br>1 | P<br>A<br>S<br>S | AC=2;AF=1.00;AN=2;BaseQRankSum=-1.301e+00;DP=6018;ExcessHet=0.0000;FS=0.000;MLEAC=2;MLEAF=1.00;MQ=60.00;MQRankSum=0.00;QD=31.54;ReadPosRankSum=-2.670e-01;SOR=0.033 | GT 1/1:12<br>:A ,5741:<br>D: 5766:9<br>DP: 9:2478<br>GQ 65,170<br>:PL 76,0                                       | BF.<br>7 | yes |
| 24<br>46<br>9 | T<br>A | 24<br>00<br>09.<br>1 | P<br>A<br>S<br>S | AC=2;AF=1.00;AN=2;DP=5834;ExcessHet=0.0000;FS=0.000;MLEAC=2;MLEAF=1.00;MQ=60.00;QD=28.86;SOR=0.860                                                                  | GT 1/1:0,<br>:A 5728:5<br>D: 752:99<br>DP: :24002<br>GQ 3,1720<br>:PL 9,0<br>GT                                  | BF.<br>7 | yes |
| 24<br>72<br>0 | C<br>T | 52.<br>64            | P<br>A<br>S<br>S | AC=1;AF=0.500;AN=2;BaseQRankSum=-2.530e-01;DP=10;ExcessHet=0.0000;FS=0.000;MLEAC=1;MLEAF=0.500;MQ=60.00;MQRankSum=0.00;QD=5.26;ReadPosRankSum=-1.593e+00;SOR=0.693  | :A 0 1:8,2<br>D: :10:60<br>DP: :0 1:24<br>GQ 720_C<br>:PG _T:60,<br>T:P 0,330:<br>ID: 24720<br>PL:<br>PS<br>GT   | BF.<br>7 | no  |
| 24<br>73<br>1 | C<br>T | 35.<br>64            | P<br>A<br>S<br>S | AC=1;AF=0.500;AN=2;BaseQRankSum=1.29;DP=16;ExcessHet=0.0000;FS=0.000;MLEAC=1;MLEAF=0.500;MQ=60.00;MQRankSum=0.                                                      | :A 0/1:13<br>D: ,3:16:<br>DP: 43:43,<br>GQ 0,291<br>:PL                                                          | BF.<br>7 | no  |



|       |   |   |           |                  |                                                                                                                                                                                                        |                                                                |                                                                                       |          |     |
|-------|---|---|-----------|------------------|--------------------------------------------------------------------------------------------------------------------------------------------------------------------------------------------------------|----------------------------------------------------------------|---------------------------------------------------------------------------------------|----------|-----|
| 25000 | C | T | 1879.92.1 | P<br>A<br>S<br>S | 00;QD=2.23;ReadPosRankSum=0.405;SOR=1.002<br>AC=2;AF=1.00;AN=2;BaseQRankSum=0.936;DP=5288;ExcessHet=0.0000;FS=0.000;MLEAC=2;MLEAF=1.00;MQ=60.00;MQRankSum=0.00;QD=28.76;ReadPosRankSum=0.037;SOR=0.437 | GT<br>:A<br>D:<br>DP:<br>GQ<br>:PL                             | 1/1:1,<br>5136:5<br>137:99<br>:18800<br>6,1539<br>1,0                                 | BF.<br>7 | yes |
| 25290 | G | T | 1827.37.1 | P<br>A<br>S<br>S | AC=2;AF=1.00;AN=2;BaseQRankSum=3.81;DP=5583;ExcessHet=0.0000;FS=0.000;MLEAC=2;MLEAF=1.00;MQ=60.00;MQRankSum=-3.800e-02;QD=33.91;ReadPosRankSum=6.12;SOR=0.819                                          | GT<br>:A<br>D:<br>DP:<br>GQ<br>:PL                             | 1/1:29<br>8,5091<br>:5392:<br>99:182<br>751,54<br>30,0                                | BF.<br>7 | yes |
| 25333 | T | A | 1833.86.1 | P<br>A<br>S<br>S | AC=2;AF=1.00;AN=2;DP=4548;ExcessHet=0.0000;FS=0.000;MLEAC=2;MLEAF=1.00;MQ=60.00;MQRankSum=-2.880e-01;QD=31.54;SOR=0.430                                                                                | GT<br>:A<br>D:<br>DP:<br>GQ<br>:PG<br>_T:P<br>ID:<br>PL:<br>PS | 1 1:1,4<br>487:44<br>88:99:<br>1 1:25<br>290_G<br>_T:18<br>3400,1<br>3447,0<br>:25290 | BF.<br>7 | no  |
| 25584 | C | T | 2337.19.1 | P<br>A<br>S<br>S | AC=2;AF=1.00;AN=2;BaseQRankSum=-6.410e-01;DP=6477;ExcessHet=0.0000;FS=0.000;MLEAC=2;MLEAF=1.00;MQ=60.00;MQRankSum=-1.000e-03;QD=29.41;ReadPosRankSum=0.811;SOR=0.354                                   | GT<br>:A<br>D:<br>DP:<br>GQ<br>:PL                             | 1/1:1,<br>5925:5<br>951:99<br>:23373<br>3,1788<br>6,0                                 | BF.<br>7 | yes |
| 26060 | C | T | 2275.49.1 | P<br>A<br>S<br>S | AC=2;AF=1.00;AN=2;BaseQRankSum=2.68;DP=6003;ExcessHet=0.0000;FS=0.000;MLEAC=2;MLEAF=1.00;MQ=60.00;MQRankSum=0.382;QD=31.11;ReadPosRankSum=1.66;SOR=0.461                                               | GT<br>:A<br>D:<br>DP:<br>GQ<br>:PL                             | 1/1:5,<br>5743:5<br>754:99<br>:22756<br>3,1703<br>7,0                                 | BF.<br>7 | yes |
| 26270 | C | T | 2375.07.1 | P<br>A<br>S<br>S | AC=2;AF=1.00;AN=2;BaseQRankSum=1.85;DP=6199;ExcessHet=0.0000;FS=0.000;MLEAC=2;MLEAF=1.00;                                                                                                              | GT<br>:A<br>D:<br>DP:                                          | 1/1:2,<br>4378:4<br>410:99<br>:23752                                                  | BF.<br>7 | yes |

|    |   |   |     |   |                                                                            |     |         |     |  |     |
|----|---|---|-----|---|----------------------------------------------------------------------------|-----|---------|-----|--|-----|
| 26 |   |   |     |   | MQ=60.00;MQRankSum=-1.660e-01;QD=34.66;ReadPosRankSum=-3.670e-01;SOR=0.231 | GQ  | 1,1791  |     |  |     |
| 52 | G | A | 24  | P | AC=2;AF=1.00;AN=2;BaseQRankSum=0.413;DP=5928                               | GT  | 1/1:3,  |     |  |     |
| 9  |   |   | 78  | A | ;ExcessHet=0.0000;FS=0.00                                                  | :A  | 5771:5  |     |  |     |
|    |   |   | 02. | S | 0;MLEAC=2;MLEAF=1.00;                                                      | D:  | 776:99  | BF. |  | yes |
|    |   |   | 1   | S | MQ=60.00;MQRankSum=-4.970e-01;QD=29.40;ReadPosRankSum=1.21;SOR=0.110       | DP: | :24781  | 7   |  |     |
|    |   |   |     |   | AC=2;AF=1.00;AN=2;BaseQRankSum=0.413;DP=5928                               | GQ  | 6,1727  |     |  |     |
|    |   |   |     |   | ;ExcessHet=0.0000;FS=0.00                                                  | :PL | 0,0     |     |  |     |
| 26 |   |   | 25  | P | AC=2;AF=1.00;AN=2;DP=5987;ExcessHet=0.0000;FS                              | GT  | 1/1:2,  |     |  |     |
| 57 | C | G | 33  | A | =0.000;MLEAC=2;MLEAF                                                       | :A  | 5906:5  |     |  |     |
| 7  |   |   | 42. | S | =1.00;MQ=60.00;MQRankS                                                     | D:  | 908:99  | BF. |  | yes |
|    |   |   | 1   | S | um=-6.360e-01;QD=36.76;SOR=0.187                                           | DP: | :25335  | 7   |  |     |
|    |   |   |     |   | AC=2;AF=1.00;AN=2;DP=1;ExcessHet=0.0000;FS=0.0                             | GQ  | 6,1773  |     |  |     |
| 26 |   |   | 35. | P | 00;MLEAC=1;MLEAF=0.5                                                       | :PL | 3,0     |     |  |     |
| 62 | G | A | 48  | A | 00;MQ=60.00;QD=28.07;S                                                     | GT  |         |     |  |     |
| 0  |   |   |     | S | OR=1.609                                                                   | :A  | 1 1:0,1 |     |  |     |
|    |   |   |     |   |                                                                            | D:  | :1:3:1  |     |  |     |
|    |   |   |     |   |                                                                            | DP: | 1:2661  |     |  |     |
|    |   |   |     |   |                                                                            | GQ  | 9_T_T   | BF. |  | no  |
|    |   |   |     |   |                                                                            | :PG | AATA    | 7   |  |     |
|    |   |   |     |   |                                                                            | T:P | A:45,3  |     |  |     |
|    |   |   |     |   |                                                                            | ID: | ,0:266  |     |  |     |
|    |   |   |     |   |                                                                            | PL: | 19      |     |  |     |
|    |   |   |     |   |                                                                            | PS  |         |     |  |     |
|    |   |   |     |   |                                                                            | GT  |         |     |  |     |
|    |   |   |     |   |                                                                            | :A  | 1 1:0,1 |     |  |     |
|    |   |   |     |   |                                                                            | D:  | :1:3:1  |     |  |     |
| 26 |   |   | 35. | P | AC=2;AF=1.00;AN=2;DP=1;ExcessHet=0.0000;FS=0.0                             | DP: | 1:2661  |     |  |     |
| 62 | C | A | 48  | A | 00;MLEAC=1;MLEAF=0.5                                                       | GQ  | 9_T_T   | BF. |  | no  |
| 2  |   |   |     | S | 00;MQ=60.00;QD=29.04;S                                                     | :PG | AATA    | 7   |  |     |
|    |   |   |     | S | OR=1.609                                                                   | T:P | A:45,3  |     |  |     |
|    |   |   |     |   |                                                                            | ID: | ,0:266  |     |  |     |
|    |   |   |     |   |                                                                            | PL: | 19      |     |  |     |
|    |   |   |     |   |                                                                            | PS  |         |     |  |     |
|    |   |   |     |   |                                                                            | GT  |         |     |  |     |
|    |   |   |     |   |                                                                            | :A  | 1/1:1,  |     |  |     |
| 26 |   |   | 22  | P | QRankSum=-4.450e-01;DP=5950;ExcessHet=0.0                                  | :A  | 5810:5  |     |  |     |
| 70 | G | A | 64  | A | 000;FS=0.000;MLEAC=2;                                                      | D:  | 813:99  | BF. |  | yes |
| 9  |   |   | 13. | S | MLEAF=1.00;MQ=60.00;M                                                      | DP: | :22642  | 7   |  |     |
|    |   |   | 1   | S | QRankSum=-2.500e-                                                          | GQ  | 7,1740  |     |  |     |
|    |   |   |     |   |                                                                            | :PL | 9,0     |     |  |     |

|    |   |   |     |   |                                               |     |         |       |     |    |
|----|---|---|-----|---|-----------------------------------------------|-----|---------|-------|-----|----|
| 26 | C | T | 93  | P | 02;QD=36.76;ReadPosRank<br>Sum=1.50;SOR=0.615 | GT  | 0/1:31  |       |     |    |
| 77 |   |   | 28. | A | AC=1;AF=0.500;AN=2;Bas                        | :A  | 1,413:  | BF.   | no  |    |
| 6  |   |   | 64  | S | eQRankSum=0.419;DP=735                        | D:  | 724:99  | 7     |     |    |
|    |   |   |     | S | ;ExcessHet=0.0000;FS=1.11                     | DP: | :9336,  |       |     |    |
|    |   |   |     | S | 0;MQ=60.00;MQRankSum=                         | GQ  | 0,6321  |       |     |    |
|    |   |   |     | S | 0.00;QD=12.88;ReadPosRa                       | :PL |         |       |     |    |
|    |   |   |     | S | nkSum=-9.680e-                                |     |         |       |     |    |
|    |   |   |     | S | 01;SOR=0.597                                  |     |         |       |     |    |
| 26 | T | C | 11  | P | AC=2;AF=1.00;AN=2;Base                        | GT  | 1/1:33  |       |     |    |
| 89 |   |   | 95  | A | QRankSum=2.91;DP=4205;                        | :A  | 1,3725  |       |     |    |
| 7  |   |   | 87. | S | ExcessHet=0.0000;FS=0.00                      | D:  | :4056:  | BF.   | no  |    |
|    |   |   | 1   | S | 0;MLEAC=2;MLEAF=1.00;                         | DP: | 99:119  | 7     |     |    |
|    |   |   |     | S | MQ=60.00;MQRankSum=0.                         | GQ  | 601,10  |       |     |    |
|    |   |   |     | S | 00;QD=29.48;ReadPosRank                       | :PL | 53,0    |       |     |    |
|    |   |   |     | S | Sum=1.28;SOR=0.644                            |     |         |       |     |    |
|    |   |   |     | S | AC=2;AF=1.00;AN=2;Base                        | GT  | 1/1:24  |       |     |    |
| 27 | A | G | 21  | P | QRankSum=1.54;DP=6130;                        | :A  | 3,5534  |       |     |    |
| 03 |   |   | 11  | A | ExcessHet=0.0000;FS=0.00                      | D:  | :5820:  | BF.   | yes |    |
| 8  |   |   | 00. | S | 0;MLEAC=2;MLEAF=1.00;                         | DP: | 99:211  | 7     |     |    |
|    |   |   | 1   | S | MQ=60.00;MQRankSum=-                          | GQ  | 114,75  |       |     |    |
|    |   |   |     | S | 5.300e-                                       | :PL | 60,0    |       |     |    |
|    |   |   |     | S | 02;QD=21.53;ReadPosRank                       |     |         |       |     |    |
|    |   |   |     | S | Sum=7.27;SOR=0.562                            |     |         |       |     |    |
|    |   |   |     | S | AC=1;AF=0.500;AN=2;Bas                        | GT  | 0 1:9,4 |       |     |    |
| 27 | C | T | 93. | P | eQRankSum=0.396;DP=13;                        | :A  | :13:99  |       |     |    |
| 33 |   |   | 64  | A | ExcessHet=0.0000;FS=0.00                      | D:  | :0 1:27 |       |     |    |
| 5  |   |   |     | S | 0;MLEAC=1;MLEAF=0.50                          | DP: | GQ      | 335_C | BF. | no |
|    |   |   |     | S | 0;MQ=60.00;MQRankSum=                         | :PG | _T:10   | 7     |     |    |
|    |   |   |     | S | 0.00;QD=7.20;ReadPosRan                       | T:P | 1,0,29  |       |     |    |
|    |   |   |     | S | kSum=0.111;SOR=0.527                          | ID: | 0:2733  |       |     |    |
|    |   |   |     | S |                                               | PL: | 5       |       |     |    |
|    |   |   |     | S |                                               | PS  |         |       |     |    |
|    |   |   |     | S |                                               | GT  |         |       |     |    |
|    |   |   |     | S |                                               | :A  | 0 1:6,2 |       |     |    |
| 27 | A | T | 58. | P | AC=1;AF=0.500;AN=2;Bas                        | D:  | :8:66:  |       |     |    |
| 34 |   |   | 64  | A | eQRankSum=0.00;DP=8;Ex                        | DP: | 0 1:27  |       |     |    |
| 4  |   |   |     | S | cessHet=0.0000;FS=0.000;                      | GQ  | 335_C   | BF.   | no  |    |
|    |   |   |     | S | MLEAC=1;MLEAF=0.500;                          | :PG | _T:66,  | 7     |     |    |
|    |   |   |     | S | MQ=60.00;MQRankSum=0.                         | T:P | 0,246:  |       |     |    |
|    |   |   |     | S | 00;QD=7.33;ReadPosRankS                       | ID: | 27335   |       |     |    |
|    |   |   |     | S | um=-6.190e-01;SOR=0.693                       | PL: |         |       |     |    |
|    |   |   |     | S |                                               | PS  |         |       |     |    |

|               |     |                      |                  |                                                                                                                                                                |                                                                                                                           |          |     |
|---------------|-----|----------------------|------------------|----------------------------------------------------------------------------------------------------------------------------------------------------------------|---------------------------------------------------------------------------------------------------------------------------|----------|-----|
| 27<br>34<br>5 | A T | 58.<br>64            | P<br>A<br>S<br>S | AC=1;AF=0.500;AN=2;BaseQRankSum=0.00;DP=8;ExcessHet=0.0000;FS=0.000;MLEAC=1;MLEAF=0.500;MQ=60.00;MQRankSum=0.00;QD=7.33;ReadPosRankSum=-6.190e-01;SOR=0.693    | GT<br>:A<br>D: 0 1:6,2<br>:8:66:<br>DP: 0 1:27<br>GQ 335_C<br>:PG<br>_T:66,<br>T:P 0,246:<br>ID: 27335<br>PL:<br>PS<br>GT | BF.<br>7 | no  |
| 27<br>35<br>4 | A G | 52.<br>64            | P<br>A<br>S<br>S | AC=1;AF=0.500;AN=2;BaseQRankSum=0.253;DP=10;ExcessHet=0.0000;FS=0.000;MLEAC=1;MLEAF=0.500;MQ=60.00;MQRankSum=0.00;QD=5.26;ReadPosRankSum=-2.287e+00;SOR=0.693  | :A<br>D: 0 1:8,2<br>:10:60<br>DP: :0 1:27<br>GQ 335_C<br>:PG<br>_T:60,<br>T:P 0,249:<br>ID: 27335<br>PL:<br>PS            | BF.<br>7 | no  |
| 27<br>43<br>8 | T C | 80<br>12.<br>06      | P<br>A<br>S<br>S | AC=2;AF=1.00;AN=2;BaseQRankSum=1.09;DP=308;ExcessHet=0.0000;FS=0.000;MLEAC=2;MLEAF=1.00;MQ=60.00;MQRankSum=0.00;QD=26.89;ReadPosRankSum=-2.600e-02;SOR=0.721   | GT<br>:A 1/1:6,<br>292:29<br>D: 8:99:8<br>DP: 026,74<br>GQ 4,0<br>:PL                                                     | BF.<br>7 | no  |
| 27<br>46<br>1 | G A | 67.<br>64            | P<br>A<br>S<br>S | AC=1;AF=0.500;AN=2;BaseQRankSum=-1.242e+00;DP=8;ExcessHet=0.0000;FS=0.000;MLEAC=1;MLEAF=0.500;MQ=60.00;MQRankSum=0.00;QD=8.45;ReadPosRankSum=0.00;SOR=0.693    | GT<br>:A 0/1:4,<br>D: 4:8:75<br>DP: :75,0,1<br>GQ 09<br>:PL                                                               | BF.<br>7 | no  |
| 27<br>53<br>2 | C T | 20<br>97<br>15.<br>1 | P<br>A<br>S<br>S | AC=2;AF=1.00;AN=2;BaseQRankSum=-5.430e-01;DP=5830;ExcessHet=0.0000;FS=0.000;MLEAC=2;MLEAF=1.00;MQ=60.00;MQRankSum=0.055;QD=34.87;ReadPosRankSum=1.98;SOR=0.628 | GT 1/1:19<br>:A 8,5436<br>D: :5634:<br>DP: 99:209<br>GQ 729,92<br>:PL 93,0                                                | BF.<br>7 | yes |

|               |   |   |                      |                  |                                                                                                                                                                    |                                                                                                                                                                                               |          |     |
|---------------|---|---|----------------------|------------------|--------------------------------------------------------------------------------------------------------------------------------------------------------------------|-----------------------------------------------------------------------------------------------------------------------------------------------------------------------------------------------|----------|-----|
| 27<br>63<br>4 | T | A | 61.<br>64            | P<br>A<br>S<br>S | AC=1;AF=0.500;AN=2;BaseQRankSum=-2.720e-01;DP=15;ExcessHet=0.0000;FS=2.796;MLEAC=1;MLEAF=0.500;MQ=60.00;MQRankSum=0.00;QD=4.11;ReadPosRankSum=-6.280e-01;SOR=0.939 | GT<br>:A 0 1:12,<br>D: 3:15:6<br>DP: 9:0 1:2<br>GQ 7634_<br>:PG T_A:6<br>T:P 9,0,41<br>ID: 4:2763<br>PL: 4<br>PS<br>GT 1/1:0,<br>:A 4387:4<br>D: 402:99<br>DP: :24519<br>GQ 5,1791<br>:PL 8,0 | BF.<br>7 | no  |
| 27<br>80<br>7 | C | T | 24<br>51<br>81.<br>1 | P<br>A<br>S<br>S | AC=2;AF=1.00;AN=2;DP=6083;ExcessHet=0.0000;FS=0.000;MLEAC=2;MLEAF=1.00;MQ=60.00;QD=25.57;SOR=0.764                                                                 | GT 1/1:3,<br>:A 5824:5<br>D: 827:99<br>DP: :24027<br>GQ 5,1743<br>:PL 5,0                                                                                                                     | BF.<br>7 | yes |
| 27<br>88<br>9 | C | T | 24<br>02<br>61.<br>1 | P<br>A<br>S<br>S | AC=2;AF=1.00;AN=2;BaseQRankSum=2.41;DP=5971;ExcessHet=0.0000;FS=0.000;MLEAC=2;MLEAF=1.00;MQ=60.00;MQRankSum=-5.010e-01;QD=33.11;ReadPosRankSum=2.69;SOR=0.592      | GT 1/1:1,<br>:A 5417:5<br>D: 423:99<br>DP: :20773<br>GQ 2,1626<br>:PL 1,0                                                                                                                     | BF.<br>7 | no  |
| 28<br>09<br>3 | C | T | 20<br>77<br>18.<br>1 | P<br>A<br>S<br>S | AC=2;AF=1.00;AN=2;BaseQRankSum=-1.340e+00;DP=5628;ExcessHet=0.0000;FS=0.000;MLEAC=2;MLEAF=1.00;MQ=60.00;MQRankSum=0.00;QD=27.86;ReadPosRankSum=1.63;SOR=0.453      | GT 1 1:0,5<br>:A 904:59<br>D: 04:99:<br>DP: 1 1:28<br>GQ 271_A<br>:PG _T:25<br>T:P 4294,1<br>ID: 7762,0<br>PL: :28271<br>PS<br>GT 1/1:2,<br>:A 4789:4<br>D: 791:99<br>DP: :25989              | BF.<br>7 | yes |
| 28<br>31<br>1 | C | T | 25<br>98<br>85.<br>1 | P<br>A<br>S<br>S | AC=2;AF=1.00;AN=2;DP=5867;ExcessHet=0.0000;FS=0.000;MLEAC=2;MLEAF=1.00;MQ=60.00;QD=34.17;SOR=0.794                                                                 |                                                                                                                                                                                               |          |     |

|               |     |                      |                  |  |                                                                                                                                                                                                 |                                                                            |          |     |  |
|---------------|-----|----------------------|------------------|--|-------------------------------------------------------------------------------------------------------------------------------------------------------------------------------------------------|----------------------------------------------------------------------------|----------|-----|--|
|               |     |                      |                  |  | =1.00;MQ=60.00;QD=28.60<br>;SOR=0.969                                                                                                                                                           | GQ 9,1746<br>:PL 8,0                                                       |          |     |  |
| 28<br>33<br>0 | A G | 24<br>98<br>89.<br>1 | P<br>A<br>S<br>S |  | AC=2;AF=1.00;AN=2;DP=<br>5589;ExcessHet=0.0000;FS<br>=0.000;MLEAC=2;MLEAF<br>=1.00;MQ=60.00;QD=25.57<br>;SOR=0.933                                                                              | GT 1/1:0,<br>:A 5563:5<br>D: 578:99<br>DP: :24990<br>GQ 3,1674<br>:PL 6,0  | BF.<br>7 | yes |  |
| 28<br>50<br>9 | G T | 10<br>98<br>8.0<br>6 | P<br>A<br>S<br>S |  | AC=2;AF=1.00;AN=2;Base<br>QRankSum=-8.050e-<br>01;DP=442;ExcessHet=0.00<br>00;FS=0.000;MLEAC=2;M<br>LEAF=1.00;MQ=60.00;MQ<br>RankSum=0.00;QD=26.87;<br>ReadPosRankSum=-<br>2.384e+00;SOR=0.368  | GT 1/1:3,<br>:A 406:40<br>D: 9:99:1<br>DP: 1002,1<br>GQ 135,0<br>:PL       | BF.<br>7 | no  |  |
| 28<br>69<br>0 | G C | 33<br>00.<br>64      | P<br>A<br>S<br>S |  | AC=1;AF=0.500;AN=2;Bas<br>eQRankSum=-4.700e-<br>02;DP=355;ExcessHet=0.00<br>00;FS=1.266;MLEAC=1;M<br>LEAF=0.500;MQ=60.00;M<br>QRankSum=0.00;QD=9.48;<br>ReadPosRankSum=0.050;S<br>OR=0.749      | GT 0/1:19<br>:A 3,155:<br>D: 348:99<br>DP: :3308,<br>GQ 0,4414<br>:PL      | BF.<br>7 | no  |  |
| 28<br>88<br>1 | G A | 22<br>64<br>07.<br>1 | P<br>A<br>S<br>S |  | AC=2;AF=1.00;AN=2;Base<br>QRankSum=-<br>1.509e+00;DP=5213;Excess<br>Het=0.0000;FS=0.000;MLE<br>AC=2;MLEAF=1.00;MQ=6<br>0.00;MQRankSum=0.00;QD<br>=33.11;ReadPosRankSum=-<br>1.504e+00;SOR=0.074 | GT 1/1:21<br>:A ,5048:<br>D: 5078:9<br>DP: 9:2264<br>GQ 21,144<br>:PL 60,0 | BF.<br>7 | yes |  |
| 28<br>88<br>2 | G A | 20<br>23<br>24.<br>1 | P<br>A<br>S<br>S |  | AC=2;AF=1.00;AN=2;Base<br>QRankSum=-6.430e-<br>01;DP=4711;ExcessHet=0.0<br>000;FS=0.000;MLEAC=2;<br>MLEAF=1.00;MQ=60.00;M<br>QRankSum=0.00;QD=30.36<br>;ReadPosRankSum=1.85;SO<br>R=0.749       | GT 1/1:4,<br>:A 3966:3<br>D: 992:99<br>DP: :20233<br>GQ 8,1281<br>:PL 8,0  | BF.<br>7 | yes |  |
| 28<br>88<br>3 | G C | 19<br>57<br>93.<br>1 | P<br>A<br>S<br>S |  | AC=2;AF=1.00;AN=2;Base<br>QRankSum=-6.520e-<br>01;DP=4492;ExcessHet=0.0<br>000;FS=0.000;MLEAC=2;<br>MLEAF=1.00;MQ=60.00;M<br>QRankSum=0.168;QD=29.5                                             | GT 1/1:2,<br>:A 4379:4<br>D: 410:99<br>DP: :19657<br>GQ 6,1283<br>:PL 0,0  | BF.<br>7 | yes |  |

|    |   |   |     |   |                                                                                                                                                              |     |         |     |     |  |  |  |  |
|----|---|---|-----|---|--------------------------------------------------------------------------------------------------------------------------------------------------------------|-----|---------|-----|-----|--|--|--|--|
| 29 |   |   |     |   | 3;ReadPosRankSum=1.71;SOR=0.169                                                                                                                              |     |         |     |     |  |  |  |  |
| 09 | G | T | 19  | P | AC=2;AF=1.00;AN=2;BaseQRankSum=-                                                                                                                             | GT  | 1/1:7,  |     |     |  |  |  |  |
| 0  |   |   | 29  | A | 1.073e+00;DP=708;ExcessHet=0.0000;FS=0.000;MLEAC=2;MLEAF=1.00;MQ=6                                                                                           | :A  | 670:67  | BF. | no  |  |  |  |  |
|    |   |   | 5.0 | S | 0.00;MQRankSum=0.00;QD=28.50;ReadPosRankSum=-1.670e+00;SOR=0.728                                                                                             | D:  | 7:99:1  | 7   |     |  |  |  |  |
|    |   |   | 6   | S | AC=2;AF=1.00;AN=2;BaseQRankSum=3.20;DP=5586;ExcessHet=0.0000;FS=0.000;MLEAC=2;MLEAF=1.00;MQ=60.00;MQRankSum=-3.490e-                                         | DP: | 9309,1  |     |     |  |  |  |  |
|    |   |   |     |   | 01;QD=31.67;ReadPosRankSum=1.61;SOR=1.269                                                                                                                    | GQ  | 806,0   |     |     |  |  |  |  |
|    |   |   |     |   |                                                                                                                                                              | :PL |         |     |     |  |  |  |  |
| 29 |   |   | 20  | P | AC=1;AF=0.500;AN=2;BaseQRankSum=1.08;DP=74;ExcessHet=0.0000;FS=0.000;MLEAC=1;MLEAF=0.500;MQ=60.00;MQRankSum=0.00;QD=2.24;ReadPosRankSum=-2.756e+00;SOR=0.854 | GT  | 1/1:4,  |     |     |  |  |  |  |
| 51 | A | C | 42  | A |                                                                                                                                                              | :A  | 5300:5  | BF. | yes |  |  |  |  |
| 0  |   |   | 13. | S |                                                                                                                                                              | D:  | 304:99  | 7   |     |  |  |  |  |
|    |   |   | 1   | S |                                                                                                                                                              | DP: | :20422  |     |     |  |  |  |  |
|    |   |   |     |   |                                                                                                                                                              | GQ  | 7,1584  |     |     |  |  |  |  |
|    |   |   |     |   |                                                                                                                                                              | :PL | 7,0     |     |     |  |  |  |  |
| 29 |   |   | 15  | P | AC=2;AF=1.00;AN=2;DP=391;ExcessHet=0.0000;FS=0.000;MLEAC=2;MLEAF=1.00;MQ=60.00;QD=27.48;SOR=0.981                                                            | GT  | 1/1:0,  |     |     |  |  |  |  |
| 51 | C | T | 2.6 | A |                                                                                                                                                              | :A  | 0 1:56, | BF. | no  |  |  |  |  |
| 8  |   |   | 4   | S |                                                                                                                                                              | D:  | 12:68:  | 7   |     |  |  |  |  |
|    |   |   |     | S |                                                                                                                                                              | DP: | 99:0 1: |     |     |  |  |  |  |
|    |   |   |     |   |                                                                                                                                                              | GQ  | 29510   |     |     |  |  |  |  |
|    |   |   |     |   |                                                                                                                                                              | :PG | _A_C:   |     |     |  |  |  |  |
|    |   |   |     |   |                                                                                                                                                              | T:P | 160,0,  |     |     |  |  |  |  |
|    |   |   |     |   |                                                                                                                                                              | ID: | 1409:2  |     |     |  |  |  |  |
|    |   |   |     |   |                                                                                                                                                              | PL: | 9510    |     |     |  |  |  |  |
|    |   |   |     |   |                                                                                                                                                              | PS  |         |     |     |  |  |  |  |
| 29 |   |   | 10  | P | AC=2;AF=1.00;AN=2;BaseQRankSum=4.79;DP=5364;ExcessHet=0.0000;FS=0.000;MLEAC=2;MLEAF=1.00;MQ=60.00;QD=29.53;ReadPosRankSum=0.756;SOR=1.414                    | GT  | 1/1:16  |     |     |  |  |  |  |
| 61 | C | T | 52  | A |                                                                                                                                                              | :A  | ,5104:  | BF. | yes |  |  |  |  |
| 4  |   |   | 4.0 | S |                                                                                                                                                              | D:  | 5120:9  | 7   |     |  |  |  |  |
|    |   |   | 6   | S |                                                                                                                                                              | DP: | 9:1923  |     |     |  |  |  |  |
|    |   |   |     |   |                                                                                                                                                              | GQ  | 70,152  |     |     |  |  |  |  |
|    |   |   |     |   |                                                                                                                                                              | :PL | 81,0    |     |     |  |  |  |  |
| 29 |   |   | 19  | P | AC=2;AF=1.00;AN=2;BaseQRankSum=0.671;DP=196;ExcessHet=0.0000;FS=0.000;MLEAC=2;MLEAF=1.00;                                                                    | GT  | 1/1:2,  |     |     |  |  |  |  |
| 63 | C | T | 23  | A |                                                                                                                                                              | :A  | 188:19  | BF. | yes |  |  |  |  |
| 2  |   |   | 56. | S |                                                                                                                                                              | D:  | 0:99:5  | 7   |     |  |  |  |  |
|    |   |   | 1   | S |                                                                                                                                                              | DP: |         |     |     |  |  |  |  |
|    |   |   |     |   |                                                                                                                                                              | GQ  |         |     |     |  |  |  |  |
|    |   |   |     |   |                                                                                                                                                              | :PL |         |     |     |  |  |  |  |
| 29 |   |   | 52  | P | AC=2;AF=1.00;AN=2;BaseQRankSum=0.671;DP=196;ExcessHet=0.0000;FS=0.000;MLEAC=2;MLEAF=1.00;                                                                    | GT  | 1/1:2,  |     |     |  |  |  |  |
| 66 | C | T | 69. | A |                                                                                                                                                              | :A  | 188:19  | BF. | yes |  |  |  |  |
| 6  |   |   | 06  | S |                                                                                                                                                              | D:  | 0:99:5  | 7   |     |  |  |  |  |
|    |   |   |     | S |                                                                                                                                                              | DP: |         |     |     |  |  |  |  |

|    |     |     |   |  |                                                                                                  |                                                         |                                                                   |          |     |
|----|-----|-----|---|--|--------------------------------------------------------------------------------------------------|---------------------------------------------------------|-------------------------------------------------------------------|----------|-----|
|    |     |     |   |  | MQ=60.00;MQRankSum=0.00;QD=27.73;ReadPosRankSum=2.34;SOR=0.901                                   | GQ<br>:PL                                               | 283,52<br>1,0                                                     |          |     |
| 29 |     | 16  | P |  | AC=2;AF=1.00;AN=2;DP=4;ExcessHet=0.0000;FS=0.00;MLEAC=2;MLEAF=1.00;MQ=60.00;QD=31.31;SOR=0.693   | GT<br>:A<br>D:<br>DP:<br>GQ<br>:PG<br>T:P<br>ID:<br>PL: | 1 1:0,4<br>:4:12:<br>1 1:29<br>845_T<br>_G:18<br>0,12,0:<br>29845 | BF.<br>7 | no  |
| 84 | T G | 6.1 | A |  |                                                                                                  |                                                         |                                                                   |          |     |
| 5  |     | 4   | S |  |                                                                                                  |                                                         |                                                                   |          |     |
| 29 |     | 16  | P |  | AC=2;AF=1.00;AN=2;DP=4;ExcessHet=0.0000;FS=0.00;MLEAC=2;MLEAF=1.00;MQ=60.00;QD=31.45;SOR=0.693   | GT<br>:A<br>D:<br>DP:<br>GQ<br>:PG<br>T:P<br>ID:<br>PL: | 1 1:0,4<br>:4:12:<br>1 1:29<br>845_T<br>_G:18<br>0,12,0:<br>29845 | BF.<br>7 | no  |
| 84 | T A | 6.1 | A |  |                                                                                                  |                                                         |                                                                   |          |     |
| 6  |     | 4   | S |  |                                                                                                  |                                                         |                                                                   |          |     |
| 29 |     | 10  | P |  | AC=2;AF=1.00;AN=2;DP=41;ExcessHet=0.0000;FS=0.000;MLEAC=2;MLEAF=1.00;MQ=60.00;QD=28.63;SOR=1.148 | GT<br>:A<br>D:<br>DP:<br>GQ<br>:PL                      | 1/1:0,<br>35:35:<br>99:101<br>6,105,<br>0                         | BF.<br>7 | yes |
| 86 | G A | 02. | A |  |                                                                                                  |                                                         |                                                                   |          |     |
| 8  |     | 06  | S |  |                                                                                                  |                                                         |                                                                   |          |     |



**Table S4. The negative controls of the top 20 bacteria and fungi**

| NC1                       | NC2                       | NC3                       | NC4                                         | Bacteria Species                                                                                              |
|---------------------------|---------------------------|---------------------------|---------------------------------------------|---------------------------------------------------------------------------------------------------------------|
| 13.74045801<br>52672<br>0 | 5.4635545703<br>4815<br>0 | 18.294016559<br>9125<br>0 | 4.0456208306<br>4343<br>29.600719917<br>053 | <i>Pseudomonas(Pseudomonas)</i><br><i>Capnocytophaga(Capnocytophaga)</i>                                      |
| 0                         | 22.943017342<br>5479      | 0.1874707077<br>01922     | 0.5145059373<br>59391                       | <i>Allorhizobium-Neorhizobium-Pararhizobium-Rhizobium(Allorhizobium-Neorhizobium-Pararhizobium-Rhizobium)</i> |
| 0                         | 22.832181509<br>9752      | 0                         | 0.0606451865<br>32856                       | <i>Brevundimonas(Brevundimonas)</i>                                                                           |
| 19.84732824<br>42748      | 0.0260790194<br>288695    | 1.4945581419<br>5699      | 0.1291155584<br>2479                        | <i>Kocuria(Kocuria)</i>                                                                                       |
| 17.55725190<br>83969      | 0                         | 0                         | 0                                           | <i>Pseudoxanthomonas(Pseudoxanthomonas)</i>                                                                   |
| 0.763358778<br>625954     | 4.3682357543<br>3564      | 1.3279175128<br>8861      | 7.1972142340<br>1217                        | <i>(Proteobacteria)(Proteobacteria)</i>                                                                       |
| 0                         | 2.3601512583<br>1269      | 9.4099880227<br>0479      | 1.5493867010<br>9748                        | <i>Delftia(Delftia) aureus,Candida albicans</i>                                                               |
| 3.053435114<br>50382      | 2.1189203285<br>9565      | 4.9523511951<br>2576      | 0.8431637224<br>40675                       | <i>(Comamonadaceae)(Comamonadaceae)</i>                                                                       |
| 7.633587786<br>25954      | 0.0521580388<br>577389    | 0.6092798000<br>31245     | 0.3462644521<br>3921                        | <i>Corynebacterium(Corynebacterium)</i>                                                                       |
| 3.816793893<br>12977      | 0.5998174468<br>63998     | 3.6765088788<br>2102      | 0.0469511121<br>544692                      | <i>Chryseobacterium(Chryseobacterium)</i>                                                                     |
| 3.053435114<br>50382      | 1.1148780805<br>8417      | 2.4058740821<br>7466      | 1.3068059549<br>6606                        | <i>(Bacteria) (Bacteria)</i>                                                                                  |
| 0                         | 1.2778719520<br>146       | 0.6249023590<br>06405     | 4.1043097208<br>3651                        | <i>Enhydrobacter(Enhydrobacter)</i>                                                                           |
| 1.526717557<br>25191      | 0.8475681314<br>38258     | 2.7339478206<br>5302      | 0.6436214957<br>84181                       | <i>Acinetobacter(Acinetobacter)</i>                                                                           |
| 3.053435114<br>50382      | 0.5411396531<br>49042     | 2.1298755402<br>8016      | 0.0039125926<br>795391                      | <i>(Sphingomonadaceae)(Sphingomonadaceae)</i>                                                                 |
| 0                         | 0                         | 0                         | 5.5128430854<br>7059                        | <i>Capnocytophaga uncultured Capnocytophaga sp.</i>                                                           |
| 0                         | 0                         | 0.2812060615<br>52882     | 5.1959230784<br>2792                        | <i>Fusobacterium (Fusobacterium)</i>                                                                          |
| 0                         | 5.1766853566<br>3059      | 0.0989428735<br>093475    | 0                                           | <i>Caulobacter (Caulobacter)</i>                                                                              |
| 4.580152671<br>75572      | 0                         | 0.4895068478<br>88351     | 0                                           | <i>Corynebacterium uncultured bacterium</i>                                                                   |
| 0                         | 5.0397705046<br>2903      | 0                         | 0                                           | <i>(Caulobacteraceae)(Caulobacteraceae)</i>                                                                   |

|             |             |             |             | Fungi Species                   |
|-------------|-------------|-------------|-------------|---------------------------------|
| 85.71428571 | 54.46428571 | 87.06165337 | 83.40168357 | <i>AglaucusCBS516.65</i>        |
| 0           | 15.47619048 | 8.12761109  | 7.446578891 | <i>AmnigerUAMH3544</i>          |
| 14.28571429 | 9.821428571 | 2.709203697 | 3.345564429 | <i>AmutatusUAMH3576</i>         |
| 0           | 8.779761905 | 0.050639321 | 1.057630045 | <i>AsydowiiCBS593.65</i>        |
| 0           | 6.398809524 | 0.215217116 | 0.280595726 | <i>BcinereaB05-10</i>           |
| 0           | 4.31547619  | 0.025319661 | 0.884955752 | <i>CeuropaeaCBS101466</i>       |
| 0           | 0           | 0.746929991 | 1.273472912 | <i>CparapsilosisCDC317</i>      |
| 0           | 0           | 0           | 1.208720052 | <i>CqueenslandicumCBS280.77</i> |
| 0           | 0           | 0.113938473 | 1.036045759 | <i>EoligospermaCBS72588</i>     |
| 0           | 0.595238095 | 0.36713508  | 0           | <i>MglobosaCBS7966</i>          |
| 0           | 0           | 0.582352196 | 0.06475286  | <i>MrestrictaKCTC27527</i>      |
| 0           | 0.148809524 | 0           | 0           | <i>PjiroveciiSE8</i>            |
| 0           | 0           | 0           | 0           | <i>PrubensWisconsin54-1255</i>  |
| 0           | 0           | 0           | 0           | <i>Smacrosporak-hell</i>        |
| 0           | 0           | 0           | 0           | <i>YlipolyticaCLIB122</i>       |
| 0           | 0           | 0           | 0           | <i>YlipolyticaCLIB89W29</i>     |

**Table S5. Escherichia coli and Aspergillus in bronchoalveolar lavage fluid detected by RNA-seq, confirmed by sputum culture**

| Sample | Clinical outcomes | RNA-seq                                                                                 | Sputum culture          |
|--------|-------------------|-----------------------------------------------------------------------------------------|-------------------------|
| s26    | death             | <i>Escherichia coli</i> ,<br><i>Pseudomonas</i> , <i>Neisseria</i>                      | <i>Escherichia coli</i> |
| s2     | death             | <i>Escherichia coli</i> ,<br><i>Streptococcus pneumoniae</i> ,<br><i>Granulicatella</i> | <i>Escherichia coli</i> |
| s28    | death             | <i>Escherichia coli</i> , <i>Gemella</i> ,<br><i>Klebsiella</i>                         | <i>Escherichia coli</i> |
| ss21   | survival          | <i>Aspergillus</i> ,<br><i>Corynebacterium</i> , <i>Neisseria</i>                       | <i>Aspergillus</i>      |
| ss7    | death             | <i>Aspergillus</i> , <i>Catelicoccus</i> ,<br><i>Aliterella</i>                         | <i>Aspergillus</i>      |

**Table S6. Characteristics of the HAP/CAP**

|               | Survival(n=20)<br>Median (IQR) | Death(n=7)<br>Median (IQR) | <i>P</i> value |
|---------------|--------------------------------|----------------------------|----------------|
| Age, yr       | 73.50 (26.00)                  | 71.00 (24.00)              | 0.69           |
| Sex           |                                |                            | 1.00           |
| Male, n (%)   | 16.00(75.00)                   | 6.00(85.71)                |                |
| Female, n (%) | 4.00(25.00)                    | 1.00(14.29)                |                |

HAP/CAP:Hospital/Community Acquired Pneumonia,IQR=interquartile range, *P* values were evaluated by Mann-Whitney test or Chi-square test ,Two-tailed degree of significance between groups was set at  $P < 0.05$ .

**Table S7. Sputum culture and sequencing analysis identified pathogens in the HAP/CAP cohort**

| Sample | RNA-seq of Bronchoalveolar Lavage Fluid              | Sputum culture                                       |
|--------|------------------------------------------------------|------------------------------------------------------|
| B20    | <i>Proteus mirabilis</i>                             | <i>Proteus mirabilis</i>                             |
| B24    | <i>C.albicans</i>                                    | <i>Candida albicans</i>                              |
| B25    | <i>C.albicans</i>                                    | <i>Candida albicans</i>                              |
| B26    | <i>Enterococcus</i>                                  | negative                                             |
| B27    | <i>Acinetobacter baumannii</i>                       | <i>Acinetobacter baumannii</i>                       |
| B28    | <i>C.albicans,Acinetobacter baumannii</i>            | <i>Candida albicans,Acinetobacter baumannii</i>      |
| B37    | <i>Acinetobacter baumannii</i>                       | <i>Acinetobacter baumannii</i>                       |
| X13    | <i>Staphylococcus aureus,Candida albicans</i>        | <i>Staphylococcus aureus,Candida albicans</i>        |
| X23    | <i>Enterococcus,Candida</i>                          | <i>Enterococcus,Candida</i>                          |
| X5     | <i>Acinetobacter baumannii,Klebsiella pneumoniae</i> | <i>Acinetobacter baumannii,Klebsiella pneumoniae</i> |
| X6     | <i>Neisseria</i>                                     | <i>Viridans Streptococci,Neisseria</i>               |
| X8     | <i>Pseudomonas aeruginosa</i>                        | <i>Pseudomonas aeruginosa</i>                        |
| X9     | <i>Pseudomonas aeruginosa</i>                        | <i>Pseudomonas aeruginosa</i>                        |
| X3     | <i>Acinetobacter baumannii</i>                       | <i>Acinetobacter baumannii</i>                       |
